# Supplementary material for: Long non-coding RNAs defining major subtypes of B cell precursor acute lymphoblastic leukemia
Source: J Hematol Oncol. 2019 Jan 14;12:8. doi: 10.1186/s13045-018-0692-3 (PMC6332539; doi:10.1186/s13045-018-0692-3)
Supplement: Supplementary file 3 — Table S2. The functionally involved subtype-specific lncRNAs from DUX4 and Ph-like subtypes. The trans and cis co-expressed subtype-specific lncRNAs (XLSX 143 kb) [file 13045_2018_692_MOESM3_ESM.xlsx]

## Sheet: Table_description
The functionally involved subtype-specific lncRNAs from DUX4 and Ph-like subtypes. The trans and cis-acting subtype-specific lncRNAs
Table S2_A. DUX4 specific Functional lncRNAs (Cis): 58 DUX4 specific lncRNAs correlated with the protein coding genes activated in signaling pathways in DUX4 subtype. The cis protein coding genes (within 100 Kb) for the DUX4 specific lncRNAs, obtained from GREAT.
Table S2_B. DUX4 specific Functional lncRNAs (Trans): 127 DUX4 specific lncRNAs correlated with the protein coding genes activated in signaling pathways in DUX4 subtype. The trans protein coding genes (greater than 100 Kb ) for the DUX4 specific lncRNAs, obtained from GREAT.
Table S2_C. Cis KEGG DUX4: Gene enrichment analysis results for nearby protein coding (PC) cis (hits within 100 kb of DE lncRNAs) gene from DUX4 subtype. The output contains results using KEGG as reference database in GeneSCF tool.
Table S2_D. Trans KEGG DUX4: Gene enrichment analysis results for distinct protein coding gene hits > 100 kb of DE lncRNAs from DUX4 subtype. The output contains results using KEGG as reference database in GeneSCF tool.
Table S2_E. Functions DUX4 PC lncRNAs overlap: The agreement between functional enrichment analysis using DUX4 specific DE PC genes and DUX4 specific lncRNAs. The output contains results using KEGG as reference database in GeneSCF tool.
Table S2_F. Ph-like specific Functional lncRNAs (Cis): 24 Ph-like specific lncRNAs correlated with its cis protein coding genes and activated in signaling pathways in the Ph-like subtype. The cis protein coding genes (within 100 Kb) for the Ph-like specific lncRNAs, obtained from GREAT.
Table S2_G. Ph-like specific Functional lncRNAs (Trans): 20 Ph-like lncRNAs correlated with the protein coding genes activated in signaling pathways in Ph-like subtype. The trans protein coding genes (greater than 100 Kb) for the Ph-like specific lncRNAs, obtained from GREAT
Table S2_H. Cis KEGG Ph-like: Gene enrichment analysis results for nearby PC cis (hits within 100 kb of DE lncRNAs) gene hits within 100 kb of DE lncRNAs from Ph-like subtype. The output contains results using KEGG as reference database in GeneSCF tool.
Table S2_I. Trans pathway Ph-like: Gene enrichment analysis results for distinct first protein coding gene hits > 100 kb of DE lncRNAs from Ph-like subtype. The output contains results using KEGG as reference database in GeneSCF tool.
Table S2_J. Functions Ph-like PC lncRNAs overlap: The agreement between functional enrichment analysis using Ph-like specific DE PC genes and Ph-like specific lncRNAs. The output contains results using KEGG as reference database in GeneSCF tool.

## Sheet: Table S2_A
58 DUX4 specific lncRNAs correlated with the cis PC genes involved in different signaling pathways which are significantly enriched within DUX4 subtype
Cis PC genes	DUX4 specific lncRNAs	Pearson correlation rate	P-value
ERG	RP11-719K4.6	0.576832	1.41e-08
ERG	AC135048.13	0.576925	1.4e-08
ERG	VIPR1-AS1	0.572496	1.92e-08
FCGR1A	CTD-2616J11.10	0.738574	2.39e-15
FCGR1A	AC069363.1	0.566384	2.92e-08
FCGR1A	CTD-2616J11.10	0.738574	2.39e-15
FCGR1A	AC069363.1	0.566384	2.92e-08
FCGR1A	CTD-2616J11.10	0.738574	2.39e-15
FCGR1A	AC069363.1	0.566384	2.92e-08
IGF1R	CTD-2528A14.1	0.710974	7.23e-14
IGF1R	CTC-523E23.4	0.672685	4.47e-12
IGF1R	CTB-25B13.9	0.64841	4.51e-11
IGF1R	RP11-1157N2-B.2	0.617323	6.54e-10
IGF1R	RP11-314O13.1	0.614397	8.28e-10
IGF1R	RP11-654A16.3	0.898619	2.34e-30
IGF1R	RP11-35O15.1	0.674379	3.77e-12
IGF1R	CTD-2134A5.3	0.598185	3e-09
IGF1R	LINC00637	0.550329	8.51e-08
IGF1R	RP11-725G5.2	0.57391	1.73e-08
IGF1R	RP11-186F10.2	0.632029	1.92e-10
IGF1R	RP11-87C12.5	0.704751	1.48e-13
IGF1R	RP11-264E20.1	0.621802	4.53e-10
IGF1R	AF131215.3	0.621317	4.71e-10
IGF1R	RP11-166A12.1	0.622933	4.12e-10
IGF1R	CTD-2516F10.2	0.573773	1.75e-08
IGF1R	CTD-2187J20.1	0.565492	3.1e-08
IGF1R	SMAD1-AS2	0.583731	8.62e-09
IGF1R	RP11-713M15.1	0.553452	6.94e-08
IGF1R	SPTY2D1-AS1	0.68397	1.41e-12
IGF1R	RGMB-AS1	0.659471	1.61e-11
IGF1R	RP11-696N14.1	0.636759	1.27e-10
IGF1R	RP11-744N12.3	0.574026	1.72e-08
IGF1R	RP11-624M8.1	0.706637	1.19e-13
IGF1R	RP11-528G1.2	0.614171	8.44e-10
IGF1R	AC114877.3	0.662108	1.26e-11
IGF1R	AC062029.1	0.609183	1.26e-09
IGF1R	RP11-523O18.5	0.647894	4.73e-11
IGF1R	RP11-465M18.1	0.676167	3.15e-12
IGF1R	RP11-63K6.7	0.562919	3.7e-08
IGF1R	RP11-298A8.2	0.559024	4.8e-08
IGF1R	LINC00954	0.628861	2.51e-10
IGF1R	RP11-563N6.6	0.611967	1e-09
IGF1R	PCAT6	0.684188	1.38e-12
IGF1R	RP11-735G4.1	0.634232	1.58e-10
IGF1R	RP5-1077I2.3	0.566076	2.98e-08
IGF1R	LINC00694	0.568809	2.47e-08
IGF1R	AC015977.6	0.624253	3.7e-10
IGF1R	RP1-293L8.2	0.641544	8.36e-11
IGF1R	RP3-395M20.2	0.585138	7.78e-09
IGF1R	RP11-15H20.6	0.602823	2.06e-09
IGF1R	SRRM2-AS1	0.609963	1.18e-09
IGF1R	LINC01006	0.593201	4.29e-09
IGF1R	IGF2-AS	0.63948	1e-10
IGF1R	CTD-2528A14.1	0.710974	7.23e-14
IGF1R	CTC-523E23.4	0.672685	4.47e-12
IGF1R	CTB-25B13.9	0.64841	4.51e-11
IGF1R	RP11-1157N2-B.2	0.617323	6.54e-10
IGF1R	RP11-314O13.1	0.614397	8.28e-10
IGF1R	RP11-654A16.3	0.898619	2.34e-30
IGF1R	RP11-35O15.1	0.674379	3.77e-12
IGF1R	CTD-2134A5.3	0.598185	3e-09
IGF1R	LINC00637	0.550329	8.51e-08
IGF1R	RP11-725G5.2	0.57391	1.73e-08
IGF1R	RP11-186F10.2	0.632029	1.92e-10
IGF1R	RP11-87C12.5	0.704751	1.48e-13
IGF1R	RP11-264E20.1	0.621802	4.53e-10
IGF1R	AF131215.3	0.621317	4.71e-10
IGF1R	RP11-166A12.1	0.622933	4.12e-10
IGF1R	CTD-2516F10.2	0.573773	1.75e-08
IGF1R	CTD-2187J20.1	0.565492	3.1e-08
IGF1R	SMAD1-AS2	0.583731	8.62e-09
IGF1R	RP11-713M15.1	0.553452	6.94e-08
IGF1R	SPTY2D1-AS1	0.68397	1.41e-12
IGF1R	RGMB-AS1	0.659471	1.61e-11
IGF1R	RP11-696N14.1	0.636759	1.27e-10
IGF1R	RP11-744N12.3	0.574026	1.72e-08
IGF1R	RP11-624M8.1	0.706637	1.19e-13
IGF1R	RP11-528G1.2	0.614171	8.44e-10
IGF1R	AC114877.3	0.662108	1.26e-11
IGF1R	AC062029.1	0.609183	1.26e-09
IGF1R	RP11-523O18.5	0.647894	4.73e-11
IGF1R	RP11-465M18.1	0.676167	3.15e-12
IGF1R	RP11-63K6.7	0.562919	3.7e-08
IGF1R	RP11-298A8.2	0.559024	4.8e-08
IGF1R	LINC00954	0.628861	2.51e-10
IGF1R	RP11-563N6.6	0.611967	1e-09
IGF1R	PCAT6	0.684188	1.38e-12
IGF1R	RP11-735G4.1	0.634232	1.58e-10
IGF1R	RP5-1077I2.3	0.566076	2.98e-08
IGF1R	LINC00694	0.568809	2.47e-08
IGF1R	AC015977.6	0.624253	3.7e-10
IGF1R	RP1-293L8.2	0.641544	8.36e-11
IGF1R	RP3-395M20.2	0.585138	7.78e-09
IGF1R	RP11-15H20.6	0.602823	2.06e-09
IGF1R	SRRM2-AS1	0.609963	1.18e-09
IGF1R	LINC01006	0.593201	4.29e-09
IGF1R	IGF2-AS	0.63948	1e-10
IGF1R	CTD-2528A14.1	0.710974	7.23e-14
IGF1R	CTC-523E23.4	0.672685	4.47e-12
IGF1R	CTB-25B13.9	0.64841	4.51e-11
IGF1R	RP11-1157N2-B.2	0.617323	6.54e-10
IGF1R	RP11-314O13.1	0.614397	8.28e-10
IGF1R	RP11-654A16.3	0.898619	2.34e-30
IGF1R	RP11-35O15.1	0.674379	3.77e-12
IGF1R	CTD-2134A5.3	0.598185	3e-09
IGF1R	LINC00637	0.550329	8.51e-08
IGF1R	RP11-725G5.2	0.57391	1.73e-08
IGF1R	RP11-186F10.2	0.632029	1.92e-10
IGF1R	RP11-87C12.5	0.704751	1.48e-13
IGF1R	RP11-264E20.1	0.621802	4.53e-10
IGF1R	AF131215.3	0.621317	4.71e-10
IGF1R	RP11-166A12.1	0.622933	4.12e-10
IGF1R	CTD-2516F10.2	0.573773	1.75e-08
IGF1R	CTD-2187J20.1	0.565492	3.1e-08
IGF1R	SMAD1-AS2	0.583731	8.62e-09
IGF1R	RP11-713M15.1	0.553452	6.94e-08
IGF1R	SPTY2D1-AS1	0.68397	1.41e-12
IGF1R	RGMB-AS1	0.659471	1.61e-11
IGF1R	RP11-696N14.1	0.636759	1.27e-10
IGF1R	RP11-744N12.3	0.574026	1.72e-08
IGF1R	RP11-624M8.1	0.706637	1.19e-13
IGF1R	RP11-528G1.2	0.614171	8.44e-10
IGF1R	AC114877.3	0.662108	1.26e-11
IGF1R	AC062029.1	0.609183	1.26e-09
IGF1R	RP11-523O18.5	0.647894	4.73e-11
IGF1R	RP11-465M18.1	0.676167	3.15e-12
IGF1R	RP11-63K6.7	0.562919	3.7e-08
IGF1R	RP11-298A8.2	0.559024	4.8e-08
IGF1R	LINC00954	0.628861	2.51e-10
IGF1R	RP11-563N6.6	0.611967	1e-09
IGF1R	PCAT6	0.684188	1.38e-12
IGF1R	RP11-735G4.1	0.634232	1.58e-10
IGF1R	RP5-1077I2.3	0.566076	2.98e-08
IGF1R	LINC00694	0.568809	2.47e-08
IGF1R	AC015977.6	0.624253	3.7e-10
IGF1R	RP1-293L8.2	0.641544	8.36e-11
IGF1R	RP3-395M20.2	0.585138	7.78e-09
IGF1R	RP11-15H20.6	0.602823	2.06e-09
IGF1R	SRRM2-AS1	0.609963	1.18e-09
IGF1R	LINC01006	0.593201	4.29e-09
IGF1R	IGF2-AS	0.63948	1e-10
IGF1R	CTD-2528A14.1	0.710974	7.23e-14
IGF1R	CTC-523E23.4	0.672685	4.47e-12
IGF1R	CTB-25B13.9	0.64841	4.51e-11
IGF1R	RP11-1157N2-B.2	0.617323	6.54e-10
IGF1R	RP11-314O13.1	0.614397	8.28e-10
IGF1R	RP11-654A16.3	0.898619	2.34e-30
IGF1R	RP11-35O15.1	0.674379	3.77e-12
IGF1R	CTD-2134A5.3	0.598185	3e-09
IGF1R	LINC00637	0.550329	8.51e-08
IGF1R	RP11-725G5.2	0.57391	1.73e-08
IGF1R	RP11-186F10.2	0.632029	1.92e-10
IGF1R	RP11-87C12.5	0.704751	1.48e-13
IGF1R	RP11-264E20.1	0.621802	4.53e-10
IGF1R	AF131215.3	0.621317	4.71e-10
IGF1R	RP11-166A12.1	0.622933	4.12e-10
IGF1R	CTD-2516F10.2	0.573773	1.75e-08
IGF1R	CTD-2187J20.1	0.565492	3.1e-08
IGF1R	SMAD1-AS2	0.583731	8.62e-09
IGF1R	RP11-713M15.1	0.553452	6.94e-08
IGF1R	SPTY2D1-AS1	0.68397	1.41e-12
IGF1R	RGMB-AS1	0.659471	1.61e-11
IGF1R	RP11-696N14.1	0.636759	1.27e-10
IGF1R	RP11-744N12.3	0.574026	1.72e-08
IGF1R	RP11-624M8.1	0.706637	1.19e-13
IGF1R	RP11-528G1.2	0.614171	8.44e-10
IGF1R	AC114877.3	0.662108	1.26e-11
IGF1R	AC062029.1	0.609183	1.26e-09
IGF1R	RP11-523O18.5	0.647894	4.73e-11
IGF1R	RP11-465M18.1	0.676167	3.15e-12
IGF1R	RP11-63K6.7	0.562919	3.7e-08
IGF1R	RP11-298A8.2	0.559024	4.8e-08
IGF1R	LINC00954	0.628861	2.51e-10
IGF1R	RP11-563N6.6	0.611967	1e-09
IGF1R	PCAT6	0.684188	1.38e-12
IGF1R	RP11-735G4.1	0.634232	1.58e-10
IGF1R	RP5-1077I2.3	0.566076	2.98e-08
IGF1R	LINC00694	0.568809	2.47e-08
IGF1R	AC015977.6	0.624253	3.7e-10
IGF1R	RP1-293L8.2	0.641544	8.36e-11
IGF1R	RP3-395M20.2	0.585138	7.78e-09
IGF1R	RP11-15H20.6	0.602823	2.06e-09
IGF1R	SRRM2-AS1	0.609963	1.18e-09
IGF1R	LINC01006	0.593201	4.29e-09
IGF1R	IGF2-AS	0.63948	1e-10
THBS4	RP11-455F5.5	0.583453	8.79e-09
THBS4	AC006369.2	0.581105	1.04e-08
THBS4	RP11-206L10.3	0.620551	5.02e-10
THBS4	AC009495.2	0.572974	1.85e-08
THBS4	LINC01001	0.58857	6.05e-09
THBS4	RP11-455F5.5	0.583453	8.79e-09
THBS4	AC006369.2	0.581105	1.04e-08
THBS4	RP11-206L10.3	0.620551	5.02e-10
THBS4	AC009495.2	0.572974	1.85e-08
THBS4	LINC01001	0.58857	6.05e-09
IFNG	LA16c-380H5.2	0.602178	2.17e-09
IFNG	RP11-229P13.19	0.687351	9.92e-13
IFNG	AC006369.2	0.61321	9.11e-10
IFNG	RP11-206L10.3	0.563928	3.45e-08
IFNG	AC069363.1	0.575567	1.54e-08
BHLHE40	BHLHE40-AS1	0.609996	1.18e-09
TPO	CTD-2134A5.4	0.592449	4.54e-09

## Sheet: Table S2_B
127 DUX4 specific lncRNAs correlated with the trans PC genes involved in different signaling pathways which are significantly enriched within DUX4 subtype
Trans PC genes	DUX4 specific lncRNAs	Pearson correlation rate	P-value
MKL2	RP11-266O8.1	0.589238	5.76071e-09
MKL2	SMAD1-AS2	0.643675	6.91308e-11
MKL2	AC131097.3	0.615271	7.72094e-10
MKL2	SNHG14	0.598508	2.87473e-09
MKL2	LINC00487	0.576441	1.45168e-08
MKL2	AC003090.1	0.61801	6.18261e-10
MKL2	AC093642.3	0.553709	6.8234e-08
MKL2	RP11-1078H9.1	0.577754	1.32276e-08
MKL2	LL0XNC01-237H1.2	0.614321	8.3356e-10
ZSWIM2	RP11-320G24.1	0.553292	7.01237e-08
ZSWIM2	RP11-398B16.2	0.614706	8.08105e-10
ZSWIM2	AC004837.5	0.585296	7.69088e-09
ZSWIM2	RP11-251M1.1	0.721372	2.09939e-14
ZSWIM2	RP11-158M2.3	0.550687	8.31054e-08
CNTNAP3B	AC006042.7	0.581804	9.90292e-09
CNTNAP3B	RP11-426C22.6	0.580682	1.07339e-08
THY1	RP11-395G23.3	0.550643	8.33445e-08
SH3GL3	RP11-346D6.6	0.623219	4.02773e-10
EYS	CTD-3060P21.1	0.568577	2.51265e-08
FAM3D	RP11-527H14.4	0.580321	1.1015e-08
FAM3D	RP11-63K6.7	0.575364	1.56632e-08
PTPN20A	CTB-43E15.3	0.554819	6.3435e-08
PTPN20A	AC016735.1	0.692022	6.03028e-13
ETS1	SENCR	0.555734	5.97264e-08
ETS1	CTC-523E23.4	0.592596	4.48959e-09
ETS1	RP11-359D14.2	0.657963	1.86229e-11
ETS1	RP11-677M14.3	0.566538	2.89011e-08
ETS1	RP11-436M15.3	0.555021	6.25998e-08
ETS1	RP11-417E7.2	0.576709	1.42447e-08
ETS1	RP11-91I20.2	0.55527	6.15804e-08
ETS1	SERTAD4-AS1	0.602192	2.1675e-09
CBWD7	LINC00630	0.676664	2.99637e-12
CBWD7	RP11-16E12.2	0.559305	4.71178e-08
CBWD7	PHKA2-AS1	0.567125	2.77624e-08
CBWD7	LL0XNC01-237H1.2	0.640508	9.16001e-11
LRRC37A3	AC144521.1	0.554462	6.4946e-08
DMD	RP11-677M14.3	0.586636	6.97406e-09
DMD	RP11-211N8.2	0.608974	1.27664e-09
DMD	CTD-2540L5.6	0.565664	3.06791e-08
DMD	RP11-166A12.1	0.579193	1.19401e-08
NR5A2	C9orf106	0.815081	1.17564e-20
IGF1R	AC007319.1	0.653584	2.80468e-11
IGF1R	RP11-305F18.1	0.595859	3.51422e-09
IGF1R	CTD-2187J20.1	0.565492	3.10413e-08
IGF1R	CTC-523E23.4	0.672685	4.46917e-12
IGF1R	RP11-735G4.1	0.634232	1.58493e-10
IGF1R	RP11-480D4.2	0.672983	4.33816e-12
IGF1R	LINC00954	0.628861	2.50922e-10
IGF1R	RP1-90L6.2	0.689892	7.57658e-13
IGF1R	RP11-359D14.2	0.725267	1.30196e-14
IGF1R	CTD-2313P7.1	0.568492	2.52742e-08
IGF1R	SMAD1-AS2	0.583731	8.61618e-09
IGF1R	PCDH9-AS2	0.704063	1.59812e-13
IGF1R	RP11-462G22.1	0.712701	5.91261e-14
IGF1R	RP11-624M8.1	0.706637	1.19269e-13
IGF1R	AC131097.3	0.563735	3.49773e-08
IGF1R	RP1-122P22.2	0.716987	3.56112e-14
IGF1R	RP11-186F10.2	0.632029	1.9157e-10
IGF1R	RP11-298A8.2	0.559024	4.80102e-08
IGF1R	RP11-250B2.3	0.584465	8.16945e-09
IGF1R	PCDH9-AS4	0.689157	8.19364e-13
IGF1R	FGF13-AS1	0.593032	4.3459e-09
IGF1R	RP11-728K20.2	0.606325	1.57213e-09
IGF1R	RP1-293L8.2	0.641544	8.35748e-11
IGF1R	NAMA	0.591299	4.94502e-09
IGF1R	LINC00487	0.572094	1.96944e-08
IGF1R	RP1-90L6.3	0.601537	2.27963e-09
IGF1R	RP11-62C7.2	0.568044	2.60654e-08
IGF1R	RP11-446J8.1	0.729571	7.60482e-15
IGF1R	RP11-480D4.1	0.596483	3.35238e-09
IGF1R	LINC01006	0.593201	4.29129e-09
IGF1R	AC011284.3	0.597005	3.22259e-09
IGF1R	PCDH9-AS3	0.736911	2.96806e-15
IGF1R	RP11-575A19.2	0.600123	2.54107e-09
IGF1R	RP11-527H14.6	0.585576	7.53522e-09
IGF1R	AF131215.3	0.621317	4.71443e-10
IGF1R	RP11-211N8.2	0.593639	4.15272e-09
IGF1R	AC107072.2	0.594722	3.82869e-09
IGF1R	AC093642.3	0.647479	4.9085e-11
IGF1R	RP11-138M12.1	0.671028	5.26911e-12
IGF1R	CTD-2516F10.2	0.573773	1.75158e-08
IGF1R	RP11-523O18.5	0.647894	4.72733e-11
IGF1R	RP11-35O15.1	0.674379	3.7726e-12
IGF1R	RP11-725G5.2	0.57391	1.73476e-08
IGF1R	RGMB-AS1	0.659471	1.61498e-11
IGF1R	CTD-2528A14.1	0.710974	7.23405e-14
IGF1R	RP11-166A12.1	0.622933	4.12431e-10
IGF1R	RP11-713M15.1	0.553452	6.93923e-08
IGF1R	AC114877.3	0.662108	1.25615e-11
IGF1R	RP5-1077I2.3	0.566076	2.98286e-08
IGF1R	RP11-314O13.1	0.614397	8.28482e-10
IGF1R	RP11-63K6.7	0.562919	3.69629e-08
IGF1R	RP11-15H20.6	0.602823	2.06443e-09
IGF1R	RP11-563N6.6	0.611967	1.00657e-09
IGF1R	RP11-1157N2-B.2	0.617323	6.53825e-10
PIK3R1	GDNF-AS1	0.572174	1.9585e-08
PIK3R1	RP11-677M14.3	0.675194	3.476e-12
PIK3R1	RP11-158M2.2	0.617274	6.56422e-10
PIK3R1	RP11-214O1.1	0.56298	3.68096e-08
PIK3R1	RP11-815J21.1	0.57633	1.46315e-08
PIK3R1	RP11-712B9.2	0.582924	9.13435e-09
VIPR2	LINC00689	0.762781	8.25753e-17
SNTG2	AC007319.1	0.662066	1.26122e-11
SNTG2	RP11-147N17.1	0.558575	4.94701e-08
SNTG2	SENCR	0.628372	2.61532e-10
SNTG2	RP11-305F18.1	0.699833	2.56726e-13
SNTG2	RP11-16L9.4	0.601259	2.32899e-09
SNTG2	CTD-2187J20.1	0.589094	5.82197e-09
SNTG2	CTC-523E23.4	0.551929	7.66531e-08
SNTG2	RP11-735G4.1	0.83367	2.49677e-22
SNTG2	RP11-480D4.2	0.766655	4.64341e-17
SNTG2	RP11-264E18.1	0.589062	5.83592e-09
SNTG2	RP1-90L6.2	0.721081	2.175e-14
SNTG2	AC116614.1	0.696565	3.68183e-13
SNTG2	RP11-545D19.1	0.562477	3.80833e-08
SNTG2	RP11-359D14.2	0.613836	8.66722e-10
SNTG2	CTD-2313P7.1	0.550255	8.54642e-08
SNTG2	SMAD1-AS2	0.686808	1.05074e-12
SNTG2	PCDH9-AS2	0.729679	7.50192e-15
SNTG2	RP11-462G22.1	0.618339	6.01921e-10
SNTG2	RP11-624M8.1	0.84828	8.52971e-24
SNTG2	RP1-122P22.2	0.645163	6.04958e-11
SNTG2	RP11-569G13.2	0.56868	2.49501e-08
SNTG2	AC114808.2	0.717462	3.36455e-14
SNTG2	RP11-382E9.1	0.684185	1.38344e-12
SNTG2	RP11-186F10.2	0.595032	3.74037e-09
SNTG2	SLC9A9-AS2	0.606906	1.50219e-09
SNTG2	PCDH9-AS4	0.5718	2.01024e-08
SNTG2	FGF13-AS1	0.684795	1.298e-12
SNTG2	RP1-283K11.2	0.57159	2.03976e-08
SNTG2	LINC00399	0.634182	1.59178e-10
SNTG2	RP3-323P13.2	0.671572	4.99254e-12
SNTG2	RP11-367F23.2	0.689284	8.08411e-13
SNTG2	SLC9A9-AS1	0.649149	4.21695e-11
SNTG2	RP1-293L8.2	0.777165	9.19477e-18
SNTG2	NAMA	0.593524	4.18868e-09
SNTG2	LINC00487	0.641102	8.69136e-11
SNTG2	RP1-90L6.3	0.606156	1.59306e-09
SNTG2	RP11-446J8.1	0.709896	8.1985e-14
SNTG2	RP11-480D4.1	0.802404	1.27941e-19
SNTG2	PCDH9-AS3	0.744269	1.11941e-15
SNTG2	RP11-575A19.2	0.591125	5.00935e-09
SNTG2	RP11-527H14.6	0.598178	2.94801e-09
SNTG2	AF131215.3	0.64382	6.82401e-11
SNTG2	RP11-211N8.2	0.595497	3.61152e-09
SNTG2	CTC-340A15.2	0.606811	1.51345e-09
SNTG2	AC107072.2	0.591028	5.04575e-09
SNTG2	RP1-30E17.2	0.672747	4.44178e-12
SNTG2	AC093642.3	0.655616	2.32134e-11
SNTG2	RP11-138M12.1	0.775119	1.26891e-17
SNTG2	RP11-523O18.5	0.588502	6.08166e-09
SNTG2	RP11-332H18.5	0.592373	4.56513e-09
SNTG2	RP11-35O15.1	0.724342	1.45948e-14
SNTG2	RP11-725G5.2	0.644213	6.58804e-11
SNTG2	RGMB-AS1	0.787411	1.7389e-18
SNTG2	CTD-2528A14.1	0.72465	1.40502e-14
SNTG2	AC099754.1	0.569663	2.33129e-08
SNTG2	RP11-166A12.1	0.577001	1.39535e-08
SNTG2	RP11-328D5.1	0.571043	2.11883e-08
SNTG2	AC114877.3	0.705396	1.37393e-13
SNTG2	RP5-1077I2.3	0.559511	4.6476e-08
SNTG2	RP11-314O13.1	0.64349	7.02816e-11
SNTG2	RP11-43N5.1	0.58383	8.55515e-09
SNTG2	RP5-1024N4.4	0.670737	5.42342e-12
SNTG2	RP11-1078H9.1	0.672485	4.55903e-12
SNTG2	RP11-80H8.3	0.644334	6.51699e-11
SNTG2	RP11-486O13.2	0.60456	1.80424e-09
SNTG2	RP11-15H20.6	0.612907	9.33756e-10
SNTG2	RP11-676J15.1	0.620825	4.90944e-10
SNTG2	RP11-563N6.6	0.566231	2.95133e-08
SNTG2	LINC00930	0.614701	8.08415e-10
SNTG2	RP11-1157N2-B.2	0.601205	2.33865e-09
SNTG2	WI2-85898F10.1	0.588986	5.86878e-09
SNTG2	AC108462.1	0.678555	2.47251e-12
GPR34	RP11-728K20.2	0.590729	5.1587e-09
JAG1	AC104820.2	0.596692	3.29988e-09
ZNF30	CTC-523E23.4	0.738949	2.27307e-15
ZNF30	RP11-264E18.1	0.552358	7.45415e-08
ZNF30	RP11-462G22.1	0.595429	3.63027e-09
ZNF30	RP11-624M8.1	0.575891	1.50924e-08
ZNF30	RP1-122P22.2	0.571022	2.12196e-08
ZNF30	RP11-186F10.2	0.583246	8.92399e-09
ZNF30	LINC00487	0.558514	4.96727e-08
ZNF30	PCDH9-AS3	0.620736	4.94524e-10
ZNF30	RGMB-AS1	0.566554	2.88686e-08
ZNF30	RP11-15H20.6	0.576863	1.40904e-08
ZNF30	RP11-676J15.1	0.573477	1.78814e-08
HEY2	AC007319.1	0.706674	1.18764e-13
HEY2	RP11-147N17.1	0.558134	5.09429e-08
HEY2	SENCR	0.637561	1.18685e-10
HEY2	RP11-305F18.1	0.633759	1.65094e-10
HEY2	RP11-16L9.4	0.723264	1.66624e-14
HEY2	CTD-2187J20.1	0.678309	2.53541e-12
HEY2	CTC-523E23.4	0.570648	2.17768e-08
HEY2	RP11-735G4.1	0.802348	1.29242e-19
HEY2	RP11-480D4.2	0.808919	3.8357e-20
HEY2	RP11-264E18.1	0.678069	2.59814e-12
HEY2	RP1-90L6.2	0.734828	3.88895e-15
HEY2	RP11-545D19.1	0.570815	2.15268e-08
HEY2	RP11-359D14.2	0.698989	2.81901e-13
HEY2	CTD-2313P7.1	0.610223	1.15646e-09
HEY2	SMAD1-AS2	0.630727	2.14115e-10
HEY2	PCDH9-AS2	0.701145	2.21818e-13
HEY2	RP11-462G22.1	0.715967	4.02105e-14
HEY2	AF127936.5	0.551829	7.71548e-08
HEY2	RP11-624M8.1	0.869382	3.28245e-26
HEY2	RP1-122P22.2	0.649518	4.07745e-11
HEY2	RP11-382E9.1	0.781784	4.38869e-18
HEY2	RP11-186F10.2	0.558899	4.84134e-08
HEY2	SLC9A9-AS2	0.566255	2.94645e-08
HEY2	RP11-181K12.2	0.572757	1.88057e-08
HEY2	PCDH9-AS4	0.634594	1.53616e-10
HEY2	FGF13-AS1	0.745034	1.00959e-15
HEY2	LINC00399	0.626642	3.0261e-10
HEY2	STARD4-AS1	0.556055	5.84728e-08
HEY2	RP11-367F23.2	0.645387	5.92926e-11
HEY2	SLC9A9-AS1	0.622743	4.18988e-10
HEY2	RP1-293L8.2	0.807573	4.93784e-20
HEY2	LINC00487	0.560092	4.4704e-08
HEY2	RP11-628E19.2	0.553276	7.01995e-08
HEY2	RP1-90L6.3	0.595471	3.61864e-09
HEY2	RP11-62C7.2	0.567669	2.67462e-08
HEY2	RP11-446J8.1	0.624513	3.61637e-10
HEY2	RP11-480D4.1	0.710853	7.33654e-14
HEY2	LINC01006	0.649424	4.11261e-11
HEY2	PCDH9-AS3	0.748849	5.9986e-16
HEY2	RP11-385J1.2	0.562623	3.77098e-08
HEY2	RP11-475I24.3	0.630318	2.21712e-10
HEY2	RP11-527H14.6	0.606265	1.57955e-09
HEY2	AF131215.3	0.627633	2.78373e-10
HEY2	RP11-677M14.3	0.609956	1.1812e-09
HEY2	RP11-211N8.2	0.551851	7.70459e-08
HEY2	CTC-340A15.2	0.672054	4.75925e-12
HEY2	AC107072.2	0.606156	1.59303e-09
HEY2	AC093642.3	0.648167	4.61155e-11
HEY2	RP11-138M12.1	0.732539	5.21752e-15
HEY2	RP11-23E10.3	0.565569	3.08771e-08
HEY2	RP11-855A2.3	0.560212	4.43465e-08
HEY2	RP11-332H18.5	0.575291	1.57437e-08
HEY2	RP11-80H8.4	0.565008	3.20806e-08
HEY2	ISM1-AS1	0.643809	6.83094e-11
HEY2	RP11-35O15.1	0.663114	1.14057e-11
HEY2	RP11-725G5.2	0.634805	1.50832e-10
HEY2	RGMB-AS1	0.839175	7.27856e-23
HEY2	CTD-2528A14.1	0.624682	3.56602e-10
HEY2	RP11-166A12.1	0.550387	8.47409e-08
HEY2	RP11-328D5.1	0.586954	6.81346e-09
HEY2	AC114877.3	0.647108	5.07612e-11
HEY2	RP5-1077I2.3	0.701217	2.20025e-13
HEY2	RP11-43N5.1	0.598625	2.8493e-09
HEY2	RP5-1024N4.4	0.724566	1.41966e-14
HEY2	RP11-1078H9.1	0.615211	7.75827e-10
HEY2	RP11-80H8.3	0.663511	1.0979e-11
HEY2	RP11-486O13.2	0.611885	1.01324e-09
HEY2	RP11-15H20.6	0.666585	8.15223e-12
HEY2	RP11-676J15.1	0.677758	2.68151e-12
HEY2	RP11-563N6.6	0.601149	2.34873e-09
HEY2	RP11-1157N2-B.2	0.616941	6.74466e-10
HEY2	AC108462.1	0.609936	1.18307e-09
FAM150B	RP5-1063M23.1	0.677037	2.88529e-12
FAM150B	RP13-895J2.7	0.808256	4.34502e-20
FAM150B	RP11-723O4.2	0.802092	1.35379e-19
SOX9	RP11-196E1.3	0.577732	1.32485e-08
SOX9	LINC00511	0.665442	9.11019e-12
SOX9	RP11-320G24.1	0.60732	1.4542e-09
SOX9	CTB-49A3.2	0.646665	5.28379e-11
SOX9	RP11-13K12.2	0.551774	7.74314e-08
SOX9	RP11-267C16.1	0.710554	7.59593e-14
SOX9	RP11-417E7.2	0.796047	3.97181e-19
SOX9	RP11-158M2.2	0.58113	1.0394e-08
SOX9	SERTAD4-AS1	0.639762	9.78323e-11
IRX6	CTC-523E23.4	0.618203	6.08615e-10
IRX6	RP11-462G22.1	0.554073	6.66225e-08
IRX6	SMAD1-AS1	0.613393	8.98088e-10
IRX6	RP11-470P21.2	0.58737	6.60922e-09
IRX6	AC131097.3	0.573217	1.82098e-08
IRX6	RP1-122P22.2	0.574035	1.71961e-08
IRX6	AC093642.4	0.590965	5.06945e-09
IRX6	PCDH9-AS4	0.709383	8.69898e-14
IRX6	RP11-728K20.2	0.652347	3.14453e-11
IRX6	RP11-260O18.1	0.66065	1.44384e-11
IRX6	RP11-62C7.2	0.718812	2.86168e-14
IRX6	RP11-85B7.2	0.853781	2.17896e-24
IRX6	AC093642.3	0.575989	1.49879e-08
IRX6	RP11-436M15.3	0.641934	8.07319e-11
IRX6	RP11-166A12.1	0.763725	7.18358e-17
IRX6	RP11-358M11.3	0.708669	9.44663e-14
IRX6	RP11-809C18.3	0.550701	8.30292e-08
IRX6	RP11-82L18.2	0.606399	1.56305e-09
SYN3	CTD-2357A8.3	0.551344	7.96296e-08
NOMO1	LINC00892	0.596639	3.31302e-09
RNF113B	AC004837.5	0.555844	5.92915e-08
PRDM9	CTB-43E15.3	0.738379	2.44983e-15
PRDM9	RP11-18H21.1	0.655697	2.3037e-11
PRDM9	AC016735.1	0.822406	2.7186e-21
SALL3	RP11-267C16.1	0.774732	1.34817e-17
SALL3	RP11-417E7.2	0.783409	3.36833e-18
SALL3	RP11-158M2.2	0.610272	1.15197e-09
SALL3	SERTAD4-AS1	0.5599	4.52832e-08
ATP10B	RP11-305F18.1	0.652105	3.2157e-11
ATP10B	RP11-16L9.4	0.565279	3.14946e-08
ATP10B	CTD-2187J20.1	0.673422	4.15209e-12
ATP10B	RP11-735G4.1	0.778916	6.96119e-18
ATP10B	LINC00511	0.570949	2.13267e-08
ATP10B	RP1-90L6.2	0.793991	5.6808e-19
ATP10B	RP11-292F22.5	0.583904	8.50935e-09
ATP10B	RP11-545D19.1	0.772635	1.86758e-17
ATP10B	RP11-359D14.2	0.62967	2.34275e-10
ATP10B	AC113607.3	0.560504	4.34879e-08
ATP10B	SMAD1-AS2	0.583695	8.63891e-09
ATP10B	PCDH9-AS2	0.612571	9.59193e-10
ATP10B	SPANXA2-OT1	0.635234	1.45335e-10
ATP10B	AF127936.5	0.56261	3.77413e-08
ATP10B	RP11-624M8.1	0.571405	2.06616e-08
ATP10B	SNHG14	0.551396	7.93641e-08
ATP10B	RP1-122P22.2	0.566244	2.94875e-08
ATP10B	AC114808.2	0.624058	3.75639e-10
ATP10B	CCND2-AS2	0.593958	4.05482e-09
ATP10B	RP11-382E9.1	0.650779	3.63268e-11
ATP10B	PCDH9-AS4	0.579033	1.2077e-08
ATP10B	RP1-283K11.2	0.73589	3.38928e-15
ATP10B	LINC00399	0.62661	3.03426e-10
ATP10B	STARD4-AS1	0.598084	2.96914e-09
ATP10B	RP3-323P13.2	0.7001	2.49223e-13
ATP10B	RP11-367F23.2	0.679049	2.35081e-12
ATP10B	SLC9A9-AS1	0.743223	1.28851e-15
ATP10B	RP1-293L8.2	0.576335	1.46264e-08
ATP10B	RP1-90L6.3	0.682157	1.70785e-12
ATP10B	RP11-62C7.2	0.730369	6.87579e-15
ATP10B	RP11-649G15.2	0.586554	7.01606e-09
ATP10B	RP11-446J8.1	0.559938	4.51669e-08
ATP10B	RP11-480D4.1	0.642601	7.60833e-11
ATP10B	PCDH9-AS3	0.701266	2.18837e-13
ATP10B	RP11-385J1.2	0.629125	2.45369e-10
ATP10B	AF131215.3	0.557972	5.14955e-08
ATP10B	LINC01115	0.848761	7.58578e-24
ATP10B	RP11-484L8.1	0.56109	4.18113e-08
ATP10B	RP11-369K17.1	0.649788	3.97777e-11
ATP10B	AC107072.2	0.624296	3.68245e-10
ATP10B	AC093642.3	0.751284	4.28205e-16
ATP10B	LINC00238	0.606061	1.60491e-09
ATP10B	RP11-855A2.3	0.55435	6.5424e-08
ATP10B	RP11-332H18.5	0.8958	6.63711e-30
ATP10B	RP11-725G5.2	0.559849	4.54381e-08
ATP10B	RGMB-AS1	0.774182	1.46886e-17
ATP10B	RP11-328D5.1	0.578833	1.22502e-08
ATP10B	AC114877.3	0.691145	6.62604e-13
ATP10B	RBMS3-AS3	0.551233	8.02102e-08
ATP10B	RP11-43N5.1	0.715055	4.48078e-14
ATP10B	RP5-1024N4.4	0.560371	4.38752e-08
ATP10B	RP11-1078H9.1	0.680929	1.93863e-12
ATP10B	RP11-80H8.3	0.637868	1.15539e-10
ATP10B	RP11-883A18.3	0.555223	6.17715e-08
ATP10B	RP11-486O13.2	0.816262	9.32563e-21
ATP10B	RP11-15H20.6	0.598691	2.83495e-09
ATP10B	WI2-85898F10.1	0.632108	1.90269e-10
ATP10B	AC108462.1	0.807588	4.92439e-20
CRYBA4	RP11-85B7.2	0.562791	3.72826e-08
MYOM2	LINC00877	0.552122	7.56972e-08
MYOM2	RP11-521D12.5	0.576338	1.46227e-08
MYOM2	RP11-16E12.2	0.656801	2.07739e-11
ID4	RP11-429E11.2	0.557347	5.36783e-08
ID4	RP11-366M4.3	0.597496	3.1047e-09
ID4	RP1-167F1.2	0.902129	6.1421e-31
ID4	GDNF-AS1	0.668141	7.00281e-12
ID4	RP11-678G15.2	0.630996	2.09268e-10
ID4	RP11-789C17.3	0.563955	3.44587e-08
ID4	RP11-345M22.1	0.73344	4.649e-15
ID4	ZEB2-AS1	0.675258	3.4536e-12
ID4	GFOD1-AS1	0.557269	5.39575e-08
ID4	RP11-13K12.2	0.598625	2.84919e-09
ID4	RP11-80H8.4	0.570556	2.19161e-08
ID4	AGAP1-IT1	0.566706	2.85716e-08
ID4	SATB2-AS1	0.590581	5.21574e-09
ID4	RP11-676J12.8	0.59287	4.39867e-09
ID4	RP11-171A24.3	0.669234	6.2903e-12
ID4	AP001422.3	0.552161	7.55061e-08
POGK	RP11-54O7.1	0.577968	1.30285e-08
SEPT11	RP13-895J2.7	0.622085	4.42455e-10
SEPT11	RP11-723O4.2	0.639151	1.03242e-10
TENM2	RP11-320G24.1	0.746307	8.49492e-16
TENM2	AC004837.5	0.795511	4.36215e-19
TENM2	GS1-57L11.1	0.593549	4.1808e-09
TENM2	RP11-251M1.1	0.808583	4.08604e-20
TENM2	RP4-607I7.1	0.576319	1.46429e-08
TENM2	RP11-158M2.3	0.705625	1.33855e-13
SAMSN1	C9orf106	0.632463	1.84576e-10
SAMSN1	AC015969.3	0.621521	4.63546e-10
FRG1	RP11-231E4.2	0.632753	1.80038e-10
FRG1	RP11-542M13.3	0.556167	5.80407e-08
TNRC6C	RP11-53B2.3	0.550388	8.47311e-08
TNRC6C	DIO3OS	0.645449	5.89626e-11
HDDC2	RP1-122P22.2	0.55978	4.56464e-08
LHX5	RP11-429E11.2	0.57948	1.16976e-08
LHX5	RP11-65J21.3	0.576975	1.39791e-08
LHX5	AC114808.2	0.671927	4.8195e-12
LHX5	RP5-1063M23.1	0.753418	3.17626e-16
LHX5	RP13-895J2.7	0.955321	4.18226e-44
LHX5	RP11-723O4.2	0.91875	4.99432e-34
LHX5	RP5-1184F4.5	0.561238	4.13961e-08
LHX5	CTB-35F21.3	0.667217	7.66505e-12
HABP2	RP11-147N17.1	0.622919	4.12934e-10
HABP2	RP11-735G4.1	0.58148	1.01363e-08
HABP2	RP11-863P13.2	0.6932	5.31108e-13
HABP2	RP11-305L7.1	0.605752	1.64417e-09
HABP2	RP11-569G13.2	0.642614	7.59959e-11
HABP2	RP11-328J6.1	0.559569	4.6296e-08
HABP2	RP11-345M22.1	0.560154	4.4518e-08
HABP2	RP11-446J8.1	0.594267	3.96167e-09
HABP2	RP11-575A19.2	0.584402	8.20718e-09
HABP2	LA16c-444G7.2	0.559721	4.58266e-08
HABP2	RP11-138M12.1	0.727588	9.75445e-15
HABP2	RP11-80H8.4	0.66218	1.2476e-11
HABP2	AGAP1-IT1	0.555331	6.13343e-08
HABP2	RP5-1024N4.4	0.590368	5.29868e-09
CXADR	RP11-206L10.3	0.570759	2.16096e-08
CXADR	RP11-361F15.2	0.566328	2.93183e-08
FAM189A2	LLNLF-65H9.1	0.566521	2.89348e-08
AUH	RP11-735G4.1	0.560952	4.21983e-08
AUH	RP1-90L6.2	0.610971	1.08977e-09
AUH	SMAD1-AS2	0.702748	1.8535e-13
AUH	PCDH9-AS2	0.57777	1.3213e-08
AUH	RP11-624M8.1	0.672376	4.60881e-12
AUH	AC131097.3	0.584278	8.28133e-09
AUH	RP1-122P22.2	0.612023	1.00213e-09
AUH	CCND2-AS2	0.606082	1.60237e-09
AUH	CTD-2023M8.1	0.589003	5.86105e-09
AUH	RP11-250B2.3	0.581477	1.01382e-08
AUH	ANKRD10-IT1	0.619321	5.55463e-10
AUH	FGF13-AS1	0.587872	6.36978e-09
AUH	RP1-293L8.2	0.638292	1.11329e-10
AUH	MYLK-AS2	0.587202	6.69088e-09
AUH	RP11-446J8.1	0.626782	2.99056e-10
AUH	RP11-480D4.1	0.562168	3.88841e-08
AUH	AC003090.1	0.579835	1.1405e-08
AUH	RP11-554F20.1	0.551363	7.95321e-08
AUH	SNORD116-20	0.608263	1.35026e-09
AUH	RP11-23E10.3	0.619655	5.40469e-10
AUH	RGMB-AS1	0.552875	7.20621e-08
AUH	RP5-1077I2.3	0.559526	4.64289e-08
AUH	RP11-15H20.6	0.644785	6.25876e-11
UBE3A	DIO3OS	0.597599	3.08057e-09
MEF2A	CTC-529G1.1	0.550105	8.63012e-08
MEF2A	ANKRD10-IT1	0.628902	2.50048e-10
MEF2A	RP11-446J8.1	0.616726	6.86313e-10
MEF2A	RP11-523O18.5	0.584766	7.99289e-09
EYA1	RP11-147N17.1	0.64183	8.14795e-11
EYA1	RP1-122P22.2	0.616397	7.0488e-10
EYA1	RP11-326E22.1	0.884259	3.51597e-28
EYA1	CCND2-AS2	0.565288	3.14745e-08
EYA1	RP11-382E9.1	0.580151	1.11497e-08
EYA1	PCDH9-AS4	0.551457	7.90462e-08
EYA1	RP11-260O18.1	0.58563	7.50587e-09
EYA1	RP11-138M12.1	0.552333	7.46635e-08
EYA1	RP11-565A3.2	0.811799	2.21902e-20
EYA1	RP5-1077I2.3	0.573282	1.81278e-08
EYA1	RP11-676J15.1	0.568674	2.49602e-08
EYA1	RP11-563N6.6	0.558532	4.96128e-08
PTGDR	AF127936.5	0.667231	7.65491e-12
PTGDR	SLC9A9-AS2	0.663083	1.14401e-11
PTGDR	SLC9A9-AS1	0.643714	6.88893e-11
PTGDR	RP11-345M22.1	0.676527	3.0382e-12
PTGDR	RP11-13K12.5	0.554343	6.54534e-08
PTGDR	ZEB2-AS1	0.560968	4.21537e-08
PTGDR	RP11-80H8.4	0.677603	2.72406e-12
PTGDR	SATB2-AS1	0.578476	1.25657e-08
PTGDR	RP11-563N6.6	0.56143	4.0864e-08
PARP11	LL0XNC01-237H1.2	0.656055	2.22782e-11
ATP6AP2	RP11-127B16.1	0.552912	7.18905e-08
ATP6AP2	LINC00630	0.598629	2.8484e-09
ATP6AP2	RP11-59D5-B.2	0.59346	4.20887e-09
ATP6AP2	RP11-473E2.2	0.58575	7.44053e-09
ATP6AP2	ST7-AS1	0.576234	1.47312e-08
TSPAN8	AC007319.1	0.604823	1.76775e-09
TSPAN8	SENCR	0.550115	8.62464e-08
TSPAN8	CTC-523E23.4	0.621051	4.81897e-10
TSPAN8	RP11-264E18.1	0.634971	1.48688e-10
TSPAN8	RP11-462G22.1	0.671535	5.01077e-12
TSPAN8	SMAD1-AS1	0.610221	1.15664e-09
TSPAN8	AC131097.3	0.564939	3.22316e-08
TSPAN8	RP1-122P22.2	0.61693	6.75027e-10
TSPAN8	RP11-186F10.2	0.725388	1.28252e-14
TSPAN8	RP11-250B2.3	0.584403	8.20674e-09
TSPAN8	PCDH9-AS4	0.574534	1.66046e-08
TSPAN8	RP11-728K20.2	0.639827	9.72789e-11
TSPAN8	ZEB2-AS1	0.63785	1.15721e-10
TSPAN8	PCDH9-AS3	0.569384	2.37675e-08
TSPAN8	RP11-575A19.2	0.59672	3.29291e-09
TSPAN8	RP11-85B7.2	0.576537	1.4419e-08
TSPAN8	RP11-251M1.1	0.612643	9.53692e-10
TSPAN8	AC093642.3	0.553123	7.09033e-08
TSPAN8	RP11-138M12.1	0.570042	2.27112e-08
TSPAN8	RP11-166A12.1	0.663079	1.14441e-11
TSPAN8	CTD-2357A8.3	0.622637	4.22684e-10
TSPAN8	JARID2-AS1	0.571848	2.00347e-08
TSPAN8	RP11-1157N2-B.2	0.621136	4.78516e-10
CHST2	AF127936.3	0.564508	3.31902e-08
CHST2	RP11-13K12.1	0.58753	6.53221e-09
CHST2	AF127936.5	0.686499	1.08558e-12
CHST2	RP11-20G13.1	0.579285	1.18615e-08
CHST2	SLC9A9-AS2	0.738421	2.43623e-15
CHST2	RP13-635I23.3	0.587952	6.33266e-09
CHST2	RP11-678G15.2	0.633433	1.69803e-10
CHST2	RP11-789C17.3	0.613199	9.12152e-10
CHST2	RP11-13K12.5	0.704014	1.60697e-13
CHST2	LINC01088	0.80567	7.0336e-20
CHST2	RP11-80H8.4	0.626981	2.94104e-10
CHST2	SPATA41	0.570601	2.1848e-08
CHST2	AC099754.1	0.766191	4.97747e-17
CHST2	AGAP1-IT1	0.663868	1.06082e-11
CHST2	RP11-125B21.2	0.563873	3.46521e-08
CHST2	AP001422.3	0.594749	3.82078e-09
SMIM21	CTD-3060P21.1	0.593454	4.21072e-09
TMEM211	RP11-480D4.2	0.587212	6.68604e-09
TMEM211	LINC00487	0.594325	3.94455e-09
BASP1	SENCR	0.56178	3.99143e-08
BASP1	RGMB-AS1	0.553576	6.8833e-08
BASP1	RP11-43N5.1	0.581215	1.03309e-08
CPEB4	RP11-206L10.3	0.593211	4.28811e-09
SYK	RP11-332H18.5	0.559096	4.77811e-08
BCKDHB	RP11-250B2.3	0.579783	1.14473e-08
ARHGEF7	RP11-158M2.2	0.55364	6.85439e-08
ZNF827	SENCR	0.573612	1.7714e-08
ZNF827	RP11-735G4.1	0.583657	8.66255e-09
ZNF827	LINC00511	0.569089	2.42555e-08
ZNF827	RP11-82O18.2	0.646872	5.18569e-11
ZNF827	RP1-90L6.2	0.606151	1.59373e-09
ZNF827	RP11-359D14.2	0.597711	3.0545e-09
ZNF827	PCDH9-AS2	0.559487	4.6551e-08
ZNF827	RP11-638F5.1	0.554474	6.48931e-08
ZNF827	RP11-624M8.1	0.589291	5.73788e-09
ZNF827	RP1-122P22.2	0.61809	6.14237e-10
ZNF827	CCND2-AS2	0.568505	2.52525e-08
ZNF827	RP11-186F10.2	0.619852	5.31811e-10
ZNF827	RP11-250B2.3	0.588231	6.20432e-09
ZNF827	RP11-181K12.2	0.696947	3.53073e-13
ZNF827	SLC9A9-AS1	0.554878	6.31899e-08
ZNF827	RP1-293L8.2	0.552268	7.49769e-08
ZNF827	NAMA	0.577356	1.36065e-08
ZNF827	RP11-446J8.1	0.580609	1.07904e-08
ZNF827	PCDH9-AS3	0.656693	2.09855e-11
ZNF827	AC107072.2	0.550603	8.3559e-08
ZNF827	AC093642.3	0.603144	2.0138e-09
ZNF827	SNORD116-20	0.637413	1.20224e-10
ZNF827	RP11-138M12.1	0.602645	2.09295e-09
ZNF827	RGMB-AS1	0.608182	1.35884e-09
ZNF827	CTD-2528A14.1	0.628478	2.59191e-10
ZNF827	RP11-328D5.1	0.577422	1.35429e-08
ZNF827	AC114877.3	0.571848	2.00359e-08
ZNF827	RP11-43N5.1	0.555784	5.9527e-08
ZNF827	RP11-80H8.3	0.571877	1.99954e-08
ZNF827	RP11-563N6.6	0.556367	5.72796e-08
PDK1	MIR29A	0.573981	1.7262e-08
PDK1	RP11-17J14.2	0.586464	7.06227e-09
PDK1	AC004837.5	0.550509	8.407e-08
FGF13	AC007319.1	0.653626	2.79362e-11
FGF13	RP11-16L9.4	0.733859	4.40571e-15
FGF13	CTD-2187J20.1	0.616624	6.92016e-10
FGF13	RP11-735G4.1	0.618776	5.80802e-10
FGF13	RP11-480D4.2	0.728949	8.22429e-15
FGF13	RP11-82O18.2	0.613537	8.87758e-10
FGF13	RP11-266O8.1	0.675232	3.46259e-12
FGF13	RP11-359D14.2	0.564436	3.33519e-08
FGF13	CTD-2313P7.1	0.661404	1.34371e-11
FGF13	SMAD1-AS2	0.554401	6.52056e-08
FGF13	PCDH9-AS2	0.59543	3.63e-09
FGF13	RP11-462G22.1	0.674735	3.63998e-12
FGF13	RP11-624M8.1	0.696079	3.88298e-13
FGF13	RP1-122P22.2	0.58364	8.6735e-09
FGF13	RP11-382E9.1	0.641583	8.3288e-11
FGF13	RP11-21L23.3	0.619235	5.59405e-10
FGF13	PCDH9-AS4	0.575281	1.57548e-08
FGF13	FGF13-AS1	0.855201	1.51824e-24
FGF13	LINC00399	0.649211	4.19322e-11
FGF13	RP1-293L8.2	0.651954	3.26074e-11
FGF13	LINC00487	0.678916	2.38317e-12
FGF13	RP11-480D4.1	0.668398	6.82883e-12
FGF13	PCDH9-AS3	0.662836	1.17153e-11
FGF13	AC107072.2	0.604552	1.80541e-09
FGF13	AC093642.3	0.578076	1.29283e-08
FGF13	RP11-35O15.1	0.570178	2.24983e-08
FGF13	RGMB-AS1	0.710278	7.84271e-14
FGF13	RP5-1077I2.3	0.553941	6.72042e-08
FGF13	RP11-1078H9.1	0.588925	5.89487e-09
FGF13	RP11-486O13.2	0.559335	4.70242e-08
FGF13	RP11-676J15.1	0.649102	4.23515e-11
FGF13	LINC00930	0.604212	1.85367e-09
EGFLAM	RP11-75C9.1	0.594044	4.02858e-09
TCF21	AC113607.3	0.619915	5.29046e-10
TCF21	RP3-323P13.2	0.596004	3.4761e-09
TCF21	NAMA	0.621684	4.57362e-10
TCF21	AC009499.1	0.941834	1.22952e-39
TCF21	LINC01091	0.819368	5.03094e-21
TCF21	RP1-30E17.2	0.616047	7.25152e-10
TCF21	RP11-440G5.2	0.808656	4.03074e-20
TCF21	RP11-358M11.3	0.575084	1.59754e-08
CABLES1	RP11-65J21.3	0.790738	9.92567e-19
CABLES1	LINC00689	0.591495	4.87367e-09
CABLES1	RP11-17J14.2	0.685457	1.21108e-12
CABLES1	RP5-1063M23.1	0.583207	8.94978e-09
CABLES1	RP11-677M14.3	0.641547	8.35505e-11
CABLES1	RP11-308N19.1	0.57742	1.3545e-08
CABLES1	RP11-417E7.2	0.629135	2.45159e-10
CABLES1	CRYM-AS1	0.561097	4.17907e-08
CABLES1	RP11-158M2.2	0.588386	6.13367e-09
CABLES1	RP5-1184F4.5	0.618858	5.76911e-10
ANKRD30B	RP11-305F18.1	0.589232	5.76313e-09
ANKRD30B	RP11-735G4.1	0.580536	1.08467e-08
ANKRD30B	RP1-90L6.2	0.592571	4.49798e-09
ANKRD30B	RP11-292F22.5	0.56439	3.34574e-08
ANKRD30B	PCDH9-AS2	0.706591	1.19903e-13
ANKRD30B	RP11-624M8.1	0.606142	1.5948e-09
ANKRD30B	RP1-122P22.2	0.603975	1.88809e-09
ANKRD30B	RP11-186F10.2	0.586991	6.79532e-09
ANKRD30B	PCDH9-AS4	0.577358	1.36046e-08
ANKRD30B	RP11-527H14.4	0.965615	1.44029e-48
ANKRD30B	RP11-728K20.2	0.642661	7.56785e-11
ANKRD30B	RP11-62C7.2	0.570619	2.18209e-08
ANKRD30B	RP11-446J8.1	0.643163	7.23649e-11
ANKRD30B	PCDH9-AS3	0.628427	2.60322e-10
ANKRD30B	CTD-2341M24.1	0.572186	1.95695e-08
ANKRD30B	RP11-527H14.6	0.890191	4.82902e-29
ANKRD30B	AC093642.3	0.572529	1.91073e-08
ANKRD30B	RP11-138M12.1	0.604662	1.78998e-09
ANKRD30B	RP11-80H8.4	0.550957	8.16612e-08
ANKRD30B	RP11-166A12.1	0.562867	3.70933e-08
ANKRD30B	RP11-314O13.1	0.571283	2.08376e-08
ANKRD30B	RP11-63K6.7	0.666059	8.581e-12
ANKRD30B	RP11-80H8.3	0.572247	1.94856e-08
ANKRD30B	RP11-563N6.6	0.594568	3.87325e-09
ANKRD30B	RP11-1157N2-B.2	0.900723	1.05656e-30
RAB12	RP11-277L2.3	0.583293	8.8938e-09
ZNF599	CTC-523E23.4	0.643302	7.14714e-11
ZNF599	RP11-264E18.1	0.712832	5.82263e-14
ZNF599	CTC-529G1.1	0.564948	3.22113e-08
ZNF599	RP1-90L6.2	0.605947	1.61931e-09
ZNF599	AF127936.3	0.592493	4.52424e-09
ZNF599	RP11-462G22.1	0.598179	2.9477e-09
ZNF599	RP1-122P22.2	0.597841	3.02436e-09
ZNF599	RP11-569G13.2	0.55144	7.91342e-08
ZNF599	CCND2-AS2	0.559029	4.79939e-08
ZNF599	RP11-382E9.1	0.601976	2.20397e-09
ZNF599	RP11-186F10.2	0.693524	5.12814e-13
ZNF599	RP11-250B2.3	0.696529	3.69645e-13
ZNF599	AC144521.1	0.654914	2.47851e-11
ZNF599	RP11-728K20.2	0.57381	1.747e-08
ZNF599	RP1-90L6.3	0.691636	6.28626e-13
ZNF599	PCDH9-AS3	0.624798	3.53141e-10
ZNF599	RP11-575A19.2	0.624379	3.65724e-10
ZNF599	CTD-2341M24.1	0.5869	6.84069e-09
ZNF599	AC003090.1	0.64674	5.24825e-11
ZNF599	RP11-138M12.1	0.557442	5.33413e-08
ZNF599	RP11-23E10.3	0.597785	3.03729e-09
ZNF599	RP11-523O18.5	0.711954	6.45283e-14
ZNF599	ZMIZ1-AS1	0.686223	1.11749e-12
ZNF599	RP11-328D5.1	0.695537	4.12005e-13
ZNF599	RP11-15H20.6	0.57075	2.16232e-08
CDK13	AC007319.1	0.556508	5.67467e-08
CDK13	CTC-523E23.4	0.555739	5.97051e-08
CDK13	RP11-735G4.1	0.597885	3.01428e-09
CDK13	RP11-264E18.1	0.559279	4.72025e-08
CDK13	RP1-90L6.2	0.564941	3.22267e-08
CDK13	RP11-359D14.2	0.592071	4.66908e-09
CDK13	SMAD1-AS2	0.576596	1.43592e-08
CDK13	PCDH9-AS2	0.648463	4.48902e-11
CDK13	RP11-624M8.1	0.642407	7.74052e-11
CDK13	SMAD1-AS1	0.563772	3.48893e-08
CDK13	AC131097.3	0.574528	1.66121e-08
CDK13	RP1-122P22.2	0.59398	4.04809e-09
CDK13	CCND2-AS2	0.557701	5.24314e-08
CDK13	RP11-382E9.1	0.568638	2.50217e-08
CDK13	RP11-298A8.2	0.564251	3.37748e-08
CDK13	CTA-221G9.11	0.572739	1.8829e-08
CDK13	ANKRD10-IT1	0.580179	1.11276e-08
CDK13	PCDH9-AS4	0.566861	2.82698e-08
CDK13	FGF13-AS1	0.567945	2.62436e-08
CDK13	AC144521.1	0.566121	2.97359e-08
CDK13	RP11-480D4.1	0.585473	7.59226e-09
CDK13	PCDH9-AS3	0.626228	3.13315e-10
CDK13	AC107072.2	0.561899	3.95948e-08
CDK13	AC093642.3	0.605331	1.69912e-09
CDK13	RP11-138M12.1	0.626962	2.94554e-10
CDK13	RP11-23E10.3	0.56739	2.7262e-08
CDK13	RP11-35O15.1	0.578525	1.25219e-08
CDK13	RGMB-AS1	0.558995	4.81052e-08
CDK13	RP11-166A12.1	0.553454	6.93854e-08
CDK13	RP11-43N5.1	0.587546	6.52409e-09
CDK13	RP11-15H20.6	0.667611	7.37597e-12
CDK13	RP11-712B9.2	0.580268	1.10574e-08
SOD2	RP11-815J21.1	0.567455	2.71407e-08
NR4A3	RP11-65J21.3	0.572006	1.98161e-08
NR4A3	MIR29A	0.656649	2.10739e-11
NR4A3	RP11-863P13.2	0.586776	6.9033e-09
NR4A3	RP11-398B16.2	0.581827	9.88639e-09
NR4A3	RP11-17J14.2	0.636815	1.26665e-10
NR4A3	RP11-677M14.3	0.569597	2.34207e-08
NR4A3	LA16c-444G7.2	0.6546	2.55197e-11
NR4A3	CRYM-AS1	0.650301	3.79548e-11
NR4A3	RP11-158M2.2	0.562689	3.75407e-08
NR4A3	RP11-214O1.1	0.571567	2.04308e-08
NR4A3	RP11-815J21.1	0.611242	1.06646e-09
NR4A3	RP5-1184F4.5	0.624231	3.70242e-10
STAB2	RP11-206L10.3	0.555728	5.97488e-08
SIPA1L1	CTB-3M24.3	0.586609	6.98817e-09
SIPA1L1	LINC00444	0.551515	7.87489e-08
ANKRD20A1	RP11-211N8.7	0.619918	5.28917e-10
ANKRD20A1	BHLHE40-AS1	0.646297	5.46239e-11
PTPLB	KCNQ5-AS1	0.556502	5.67695e-08
FCGR1B	C9orf106	0.809076	3.72389e-20
CADM2	RP11-305F18.1	0.571356	2.07333e-08
CADM2	CTD-2187J20.1	0.57478	1.63202e-08
CADM2	RP11-735G4.1	0.668016	7.08905e-12
CADM2	LINC00511	0.692644	5.63981e-13
CADM2	RP1-90L6.2	0.640534	9.13878e-11
CADM2	RP11-545D19.1	0.683566	1.47545e-12
CADM2	RP11-359D14.2	0.62591	3.21767e-10
CADM2	AC113607.3	0.553276	7.01967e-08
CADM2	PCDH9-AS2	0.56224	3.86968e-08
CADM2	SPANXA2-OT1	0.603634	1.9388e-09
CADM2	AC114808.2	0.577058	1.38965e-08
CADM2	RP1-283K11.2	0.714528	4.76852e-14
CADM2	LINC00399	0.562804	3.7251e-08
CADM2	RP3-323P13.2	0.670443	5.58365e-12
CADM2	RP11-367F23.2	0.591202	4.98073e-09
CADM2	SLC9A9-AS1	0.658418	1.78404e-11
CADM2	RP11-62C7.2	0.667644	7.35184e-12
CADM2	PCDH9-AS3	0.62415	3.72758e-10
CADM2	LINC01115	0.897474	3.58993e-30
CADM2	RP11-369K17.1	0.638546	1.08871e-10
CADM2	AC107072.2	0.651062	3.53971e-11
CADM2	AC093642.3	0.67629	3.11189e-12
CADM2	LINC00238	0.597242	3.16505e-09
CADM2	RP11-332H18.5	0.872369	1.38246e-26
CADM2	RGMB-AS1	0.656291	2.17911e-11
CADM2	AC114877.3	0.639511	1.0002e-10
CADM2	RP11-43N5.1	0.654499	2.57616e-11
CADM2	RP11-1078H9.1	0.603269	1.99435e-09
CADM2	RP11-80H8.3	0.553897	6.73988e-08
CADM2	RP11-486O13.2	0.798611	2.52748e-19
CADM2	AC108462.1	0.710327	7.79842e-14
THBS1	C9orf106	0.757965	1.66364e-16
DYNLRB2	RP11-260O18.1	0.585016	7.84908e-09
DYNLRB2	RP11-138M12.1	0.579897	1.13548e-08
DYNLRB2	RP11-314O13.1	0.61343	8.95413e-10
PSD2	CTB-35F21.3	0.85869	6.14456e-25
HMGN3	RP11-446N19.1	0.55188	7.68995e-08
HMGN3	RP11-96H19.1	0.619096	5.65779e-10
PRMT8	AL132709.1	0.620622	4.99221e-10
PRMT8	LINC01115	0.648606	4.43087e-11
PRMT8	RP11-332H18.5	0.607076	1.48227e-09
PRMT8	RP11-486O13.2	0.574285	1.68973e-08
SHH	AC007319.1	0.577956	1.30394e-08
SHH	AC004837.5	0.643576	6.97454e-11
SHH	RP11-251M1.1	0.655595	2.32577e-11
GALNT9	CTC-523E23.4	0.664492	9.9876e-12
GALNT9	RP11-462G22.1	0.580736	1.06926e-08
GALNT9	SMAD1-AS1	0.59117	4.99259e-09
GALNT9	RP11-470P21.2	0.637104	1.23515e-10
GALNT9	AC131097.3	0.573089	1.83736e-08
GALNT9	AC093642.4	0.670094	5.77928e-12
GALNT9	PCDH9-AS4	0.641835	8.1441e-11
GALNT9	RP11-728K20.2	0.693868	4.94058e-13
GALNT9	RP11-260O18.1	0.640974	8.79053e-11
GALNT9	RP11-62C7.2	0.605462	1.68185e-09
GALNT9	RP11-85B7.2	0.911778	1.17144e-32
GALNT9	RP11-436M15.3	0.67196	4.80385e-12
GALNT9	RP11-166A12.1	0.714286	4.90692e-14
GALNT9	SERTAD4-AS1	0.556931	5.51811e-08
GALNT9	RP11-358M11.3	0.775409	1.21259e-17
GALNT9	RP11-809C18.3	0.629668	2.34323e-10
GALNT9	CTD-2357A8.3	0.606317	1.57309e-09
GALNT9	RP11-82L18.2	0.576546	1.44098e-08
PLXDC2	RP11-575A19.2	0.621203	4.75899e-10
SHISA6	RP1-167F1.2	0.573645	1.76727e-08
SHISA6	GDNF-AS1	0.566882	2.82281e-08
SHISA6	AC011284.3	0.554617	6.42837e-08
SHISA6	RP11-267C16.1	0.888098	9.85682e-29
SHISA6	RP11-417E7.2	0.76009	1.22383e-16
SHISA6	RP11-91I20.2	0.582784	9.22733e-09
SHISA6	RP11-399E6.4	0.589512	5.64522e-09
SHISA6	AGAP1-IT1	0.573187	1.82482e-08
SHISA6	SERTAD4-AS1	0.680785	1.96739e-12
SHISA6	SATB2-AS1	0.587487	6.5525e-09
SHISA6	SMARCA5-AS1	0.5544	6.52099e-08
SHISA6	RP11-676J12.8	0.573457	1.79072e-08
SHISA6	RP11-171A24.3	0.768485	3.52409e-17
SHISA6	AP001422.3	0.604709	1.78351e-09
CLMP	RP11-395G23.3	0.588883	5.91331e-09
CLMP	RP11-346D6.6	0.655575	2.33015e-11
KCNMB2	RP11-527H14.4	0.677349	2.79532e-12
KCNMB2	RP11-63K6.7	0.611012	1.0862e-09
KCNMB2	RP11-1157N2-B.2	0.607839	1.39611e-09
NTN1	AC007319.1	0.752004	3.87276e-16
NTN1	SENCR	0.644604	6.36121e-11
NTN1	CTD-2187J20.1	0.586859	6.86109e-09
NTN1	CTC-523E23.4	0.72022	2.41446e-14
NTN1	RP11-462G22.1	0.737998	2.57524e-15
NTN1	SMAD1-AS1	0.565555	3.09084e-08
NTN1	RP11-470P21.2	0.551102	8.08964e-08
NTN1	AC131097.3	0.644872	6.20981e-11
NTN1	RP1-122P22.2	0.609418	1.23253e-09
NTN1	PCDH9-AS4	0.623938	3.7941e-10
NTN1	RP11-728K20.2	0.585778	7.42508e-09
NTN1	NAMA	0.560202	4.43768e-08
NTN1	LINC00487	0.551743	7.75887e-08
NTN1	RP11-260O18.1	0.553564	6.88868e-08
NTN1	RP11-62C7.2	0.588858	5.9242e-09
NTN1	RP11-85B7.2	0.760926	1.08358e-16
NTN1	RP11-251M1.1	0.564144	3.40193e-08
NTN1	RP11-677M14.3	0.559816	4.55381e-08
NTN1	AC093642.3	0.605554	1.6698e-09
NTN1	RP11-436M15.3	0.573348	1.80435e-08
NTN1	RP11-35O15.1	0.710223	7.89275e-14
NTN1	RP11-166A12.1	0.705785	1.31443e-13
NTN1	RP11-358M11.3	0.645183	6.03881e-11
NTN1	CTD-2357A8.3	0.592125	4.65026e-09
NOTCH1	RP11-723O4.2	0.596387	3.37682e-09
DEFB115	RP11-20G13.1	0.590966	5.06887e-09
DEFB115	SLC9A9-AS2	0.556386	5.72073e-08
DEFB115	RP11-13K12.5	0.590568	5.2207e-09
DEFB115	LINC01088	0.947758	1.87854e-41
DEFB115	AC099754.1	0.66702	7.81424e-12
SLIT2	LINC01059	0.556237	5.77714e-08
SLIT2	SLIT2-IT1	0.919906	2.88033e-34
SLIT2	PTPRG-AS1	0.588752	5.97086e-09
SNTB1	CTC-523E23.4	0.645929	5.64697e-11
SNTB1	RP11-359D14.2	0.618	6.18783e-10
SNTB1	RP1-122P22.2	0.553455	6.93794e-08
SNTB1	RP11-436M15.3	0.567342	2.73518e-08
SNTB1	RP11-713M15.1	0.637677	1.1749e-10
SNTB1	SERTAD4-AS1	0.558275	5.0468e-08
ROBO3	CTD-2234B20.1	0.553592	6.87594e-08
ROBO3	RP11-638F5.1	0.729025	8.14584e-15
ROBO3	ZEB2-AS1	0.609378	1.2365e-09
ROBO3	RP3-470B24.5	0.691016	6.71848e-13
ROBO3	ZMIZ1-AS1	0.705996	1.2832e-13
ROBO3	RP11-328D5.1	0.611645	1.03281e-09
ROBO3	KIF25-AS1	0.709871	8.22207e-14
ROBO3	JARID2-AS1	0.61215	9.92032e-10
ETS2	RP11-53B2.3	0.598629	2.84831e-09
ETS2	RP11-691H4.4	0.599151	2.73724e-09
ETS2	DIO3OS	0.672971	4.34346e-12
ETS2	RP11-582J16.4	0.608702	1.30431e-09
FAT4	RP11-473E2.2	0.698311	3.03851e-13
FSTL4	RP11-100K18.1	0.755183	2.47546e-16
FSTL4	GDNF-AS1	0.55885	4.85715e-08
FSTL4	RP11-81H14.2	0.798323	2.65971e-19
FSTL4	EZR-AS1	0.71078	7.39844e-14
FSTL4	RP11-712B9.2	0.580977	1.0509e-08
ACTRT1	RP3-525N10.2	0.67295	4.35262e-12
ACTRT1	RP11-366M4.3	0.774173	1.471e-17
ACTRT1	AP001172.2	0.655555	2.3345e-11
ACTRT1	RP11-789C17.3	0.715663	4.16884e-14
ACTRT1	AC099754.1	0.585343	7.66418e-09
ACTRT1	RP11-125B21.2	0.719052	2.78016e-14
IGFBP3	RP11-100K18.1	0.585999	7.30645e-09
DCC	LINC00882	0.813214	1.69013e-20
DCC	RP11-508N22.8	0.571452	2.05946e-08
STARD13	RP11-141M1.1	0.802298	1.30416e-19
STARD13	STARD13-IT1	0.706911	1.15601e-13
STARD13	STARD13-AS	0.837285	1.11708e-22
FAT1	CTB-3M24.3	0.732559	5.20418e-15
FAT1	LYST-AS1	0.635648	1.40203e-10
FAT1	LINC00444	0.594207	3.97975e-09
FAT1	RP1-62O9.3	0.782076	4.18537e-18
FGGY	AC003090.1	0.584094	8.39245e-09
BHLHE40	BHLHE40-AS1	0.609996	1.17743e-09
ZNF750	HLCS-IT1	0.620557	5.01883e-10
PROK2	RP11-206L10.3	0.706815	1.16872e-13
PROK2	AC015969.3	0.850186	5.34903e-24
PROK2	AC009495.2	0.603833	1.90913e-09
ZNF618	AC007319.1	0.652411	3.12604e-11
ZNF618	RP11-462G22.1	0.569648	2.33373e-08
ZNF618	AC131097.3	0.61897	5.71666e-10
ZNF618	RP11-250B2.3	0.568587	2.51104e-08
ZNF618	LINC00487	0.597721	3.05222e-09
ZNF618	AC093642.3	0.582396	9.48918e-09
ZNF618	SNORD116-20	0.601228	2.33453e-09
ZNF618	RP11-35O15.1	0.571258	2.08747e-08
DBX1	RP1-67K17.4	0.589512	5.64524e-09
MAP3K7	LINC00630	0.642998	7.34345e-11
MAP3K7	LL0XNC01-237H1.2	0.685939	1.15137e-12
GRAP	RP11-160E2.16	0.611369	1.05572e-09
GRAP	RP11-160E2.21	0.622766	4.18203e-10
GRAP	AC007952.4	0.599672	2.63043e-09
FKBP4	LINC00892	0.644634	6.34418e-11
NETO1	AC007319.1	0.693213	5.30347e-13
NETO1	CTD-2187J20.1	0.641854	8.13068e-11
NETO1	RP11-735G4.1	0.579714	1.15036e-08
NETO1	RP11-480D4.2	0.5801	1.11906e-08
NETO1	RP11-82O18.2	0.592841	4.40837e-09
NETO1	RP11-266O8.1	0.589731	5.5546e-09
NETO1	RP11-359D14.2	0.552096	7.58231e-08
NETO1	SMAD1-AS2	0.591472	4.88188e-09
NETO1	PCDH9-AS2	0.636937	1.25332e-10
NETO1	RP11-462G22.1	0.682592	1.63255e-12
NETO1	RP11-624M8.1	0.613724	8.74514e-10
NETO1	SMAD1-AS1	0.58178	9.92004e-09
NETO1	AC131097.3	0.564111	3.40954e-08
NETO1	RP1-122P22.2	0.639242	1.02415e-10
NETO1	PCDH9-AS4	0.634436	1.5573e-10
NETO1	FGF13-AS1	0.672123	4.72638e-12
NETO1	RP11-367F23.2	0.550916	8.1878e-08
NETO1	LINC00487	0.633725	1.65577e-10
NETO1	RP11-62C7.2	0.570555	2.19184e-08
NETO1	RP11-480D4.1	0.608025	1.37574e-09
NETO1	PCDH9-AS3	0.589691	5.5709e-09
NETO1	AC107072.2	0.588369	6.14132e-09
NETO1	AC093642.3	0.635918	1.3696e-10
NETO1	RP11-138M12.1	0.553087	7.10734e-08
NETO1	RP11-35O15.1	0.683069	1.55376e-12
NETO1	RGMB-AS1	0.645146	6.05891e-11
NETO1	RP11-166A12.1	0.611742	1.02484e-09
NETO1	RP5-1077I2.3	0.553484	6.92499e-08
NETO1	RP11-1078H9.1	0.599551	2.65481e-09
NETO1	RP11-486O13.2	0.594472	3.90134e-09
NETO1	RP11-15H20.6	0.5705	2.20009e-08
NETO1	RP11-676J15.1	0.895088	8.5919e-30
HAAO	RP11-38L15.3	0.621677	4.57638e-10
HAAO	RP11-134G8.7	0.616011	7.2726e-10
HAAO	CTC-458I2.2	0.576483	1.44736e-08
PSMG1	RP11-54O7.1	0.604684	1.7869e-09
PSMG1	CTD-2012J19.3	0.560192	4.44052e-08
PRSS1	AC007319.1	0.757812	1.70074e-16
PRSS1	CTD-2187J20.1	0.603181	2.00795e-09
PRSS1	CTC-523E23.4	0.751942	3.90646e-16
PRSS1	LINC00954	0.561561	4.05076e-08
PRSS1	PCDH9-AS2	0.555416	6.09924e-08
PRSS1	RP11-462G22.1	0.82171	3.13399e-21
PRSS1	SMAD1-AS1	0.669654	6.03569e-12
PRSS1	RP11-470P21.2	0.669689	6.01461e-12
PRSS1	AC131097.3	0.688656	8.64232e-13
PRSS1	RP1-122P22.2	0.677674	2.70466e-12
PRSS1	AC093642.4	0.675209	3.47047e-12
PRSS1	PCDH9-AS4	0.75781	1.70119e-16
PRSS1	RP11-728K20.2	0.72306	1.70853e-14
PRSS1	NAMA	0.602633	2.095e-09
PRSS1	LINC00487	0.560759	4.2749e-08
PRSS1	RP11-260O18.1	0.681234	1.87852e-12
PRSS1	RP11-62C7.2	0.68194	1.7466e-12
PRSS1	PCDH9-AS3	0.595075	3.72821e-09
PRSS1	RP11-85B7.2	0.920596	2.06611e-34
PRSS1	AC093642.3	0.673425	4.15075e-12
PRSS1	RP11-436M15.3	0.686394	1.09763e-12
PRSS1	RP11-35O15.1	0.710493	7.64995e-14
PRSS1	RP11-166A12.1	0.822311	2.77224e-21
PRSS1	RP11-358M11.3	0.816422	9.03643e-21
PRSS1	RP11-809C18.3	0.589903	5.48414e-09
PRSS1	RP11-82L18.2	0.551558	7.85323e-08
PRSS1	RP11-486O13.2	0.579879	1.13693e-08
PRSS1	RP11-15H20.6	0.550456	8.43574e-08
PRSS1	RP11-676J15.1	0.61752	6.4345e-10
SAMD11	AC145110.1	0.645848	5.68786e-11
SAMD11	RP11-54O7.1	0.797788	2.92393e-19
SAMD11	CTD-2012J19.3	0.620022	5.24435e-10
SAMD11	CTD-2201I18.1	0.561323	4.11615e-08
HIF1A	CTB-118N6.3	0.57142	2.0641e-08
HIF1A	RP11-439C15.4	0.559627	4.61168e-08
AADAT	RP11-713N11.5	0.791779	8.31168e-19
PRKCQ	RP11-403I13.8	0.555641	6.00933e-08
PRKCQ	RP6-206I17.1	0.554903	6.30873e-08
IFNK	AC003090.1	0.604861	1.76245e-09
IFNK	CTD-2281E23.1	0.561385	4.09885e-08
IFNK	RP3-323N1.2	0.601337	2.3151e-09
IFNK	RP11-53B2.4	0.570905	2.13922e-08
IFNK	LEF1-AS1	0.553049	7.1248e-08
IFNK	KB-1460A1.1	0.692724	5.59131e-13
IFNK	RP11-38L15.3	0.585842	7.39054e-09
IFNK	RP11-148B3.1	0.556505	5.6759e-08
IFNK	RP11-134G8.7	0.60751	1.43264e-09
IFNK	RP11-96H19.1	0.666801	7.98297e-12
IFNK	CTD-2023N9.1	0.753102	3.32081e-16
IFNK	RP11-114N19.3	0.641401	8.46399e-11
IFNK	CTD-3060P21.1	0.655141	2.42649e-11
BPY2C	CTB-43E15.3	0.721934	1.96051e-14
BPY2C	RP11-18H21.1	0.660556	1.45676e-11
BPY2C	AC016735.1	0.821913	3.00683e-21
LDLRAD4	RP11-53B2.3	0.828972	6.90349e-22
LDLRAD4	RP11-691H4.4	0.631042	2.08445e-10
LDLRAD4	RP11-53B2.4	0.740753	1.79121e-15
LDLRAD4	RP11-53B2.5	0.814974	1.20061e-20
LDLRAD4	RP11-53B2.1	0.600407	2.48647e-09
LDLRAD4	RP11-582J16.4	0.614396	8.28516e-10
TBX18	RP11-713N11.5	0.697005	3.50846e-13
TDRP	RP3-470B24.5	0.58616	7.22129e-09
CELF2	CELF2-AS1	0.673573	4.08981e-12
CELF2	RP6-206I17.1	0.554481	6.48646e-08
CELF2	RP11-640M9.1	0.560873	4.24233e-08
CELF2	LINC00623	0.561119	4.1729e-08
PHYKPL	AC144521.1	0.655462	2.35483e-11
PHYKPL	CTB-39G8.3	0.619168	5.62454e-10
PHYKPL	LINC00869	0.610045	1.17289e-09
PHYKPL	RP11-403I13.8	0.56886	2.4642e-08
PHYKPL	RP11-16E12.2	0.606243	1.58227e-09
PHYKPL	RP11-523O18.5	0.551697	7.78219e-08
PHYKPL	TNRC6C-AS1	0.644479	6.43293e-11
PSD3	CTD-2281E23.1	0.63824	1.11833e-10
PSD3	RP11-161I2.1	0.621839	4.51542e-10
PSD3	RP11-473E2.2	0.588973	5.87433e-09
PSD3	AC007381.2	0.658119	1.83522e-11
PSD3	AC109826.1	0.562347	3.84169e-08
PSD3	RP11-473E2.3	0.612694	9.4982e-10
CREB1	RP11-128B16.3	0.648617	4.42648e-11
CREB1	LINC00264	0.650989	3.56335e-11
PRR15	RP11-30P6.6	0.602208	2.1649e-09
PRR15	AC008697.1	0.575518	1.54941e-08
BCAT1	AC007880.1	0.621544	4.62696e-10
OR4F16	RP11-462G22.1	0.560981	4.21179e-08
OR4F16	LINC01006	0.566898	2.81978e-08
MED13L	RP11-53B2.3	0.554667	6.4075e-08
MED13L	RP11-439E19.1	0.554397	6.52208e-08
MED13L	CTB-118N6.3	0.607106	1.47887e-09
SIM2	HLCS-IT1	0.688629	8.66657e-13
SIM2	TNRC6C-AS1	0.57191	1.99491e-08
DLGAP2	CTD-2281E23.1	0.66259	1.19944e-11
DLGAP2	CTD-2281E23.2	0.71464	4.706e-14
DLGAP2	ERICH1-AS1	0.644414	6.4705e-11
THBS4	RP11-206L10.3	0.620551	5.02134e-10
THBS4	RP11-361F15.2	0.551533	7.86574e-08
THBS4	AC006369.2	0.581105	1.04132e-08
THBS4	AC009495.2	0.572974	1.85222e-08
UST	RP11-403I13.8	0.590554	5.22613e-09
UST	RP6-206I17.1	0.669702	6.00715e-12
UST	CTB-118N6.3	0.640852	8.88572e-11
CYB5A	DIAPH2-AS1	0.565263	3.15292e-08
CYB5A	LINC00707	0.746106	8.73098e-16
CYB5A	RP11-59D5-B.2	0.774526	1.39222e-17
CYB5A	RP11-473E2.2	0.763246	7.71046e-17
CYB5A	AC109826.1	0.561397	4.09568e-08
CYB5A	RP11-473E2.3	0.570449	2.20799e-08
CYB5A	CTD-3060P21.1	0.567312	2.74096e-08
DYNC1H1	DIO3OS	0.635927	1.3685e-10
AMIGO2	LINC00880	0.571221	2.09279e-08
FMN2	RP11-713N11.5	0.584481	8.16009e-09
AGR3	RP11-305L7.1	0.709943	8.15324e-14
PIK3C3	LINC00630	0.575866	1.51186e-08
FANCL	RP11-298A8.2	0.558431	4.99464e-08
CITED2	CTD-2234B20.1	0.643588	6.96696e-11
CITED2	CTB-43E15.3	0.576545	1.44106e-08
KANK1	RP11-53B2.4	0.657955	1.86383e-11
KANK1	RP11-148B3.1	0.565603	3.08061e-08
KANK1	ERICH1-AS1	0.575296	1.57381e-08
KANK1	CACNA1C-AS1	0.588507	6.07956e-09
KANK1	CTD-2023N9.1	0.630661	2.15336e-10
KANK1	CTD-2201I18.1	0.664327	1.01483e-11
HIVEP2	RP1-67K17.4	0.65229	3.16112e-11
IRX1	AC104820.2	0.654048	2.68627e-11
FCGR1A	C9orf106	0.776274	1.05847e-17
CAV2	AC007319.1	0.603561	1.94984e-09
CAV2	CTC-523E23.4	0.581445	1.01619e-08
CAV2	RP11-462G22.1	0.631981	1.92356e-10
CAV2	SMAD1-AS1	0.567103	2.7805e-08
CAV2	RP11-470P21.2	0.642917	7.39709e-11
CAV2	PCDH9-AS4	0.562939	3.69118e-08
CAV2	RP11-728K20.2	0.623493	3.93715e-10
CAV2	RP11-260O18.1	0.566007	2.99694e-08
CAV2	RP11-85B7.2	0.807291	5.20524e-20
CAV2	RP11-166A12.1	0.666569	8.16495e-12
CAV2	RP11-358M11.3	0.651079	3.5341e-11
CAV2	RP11-809C18.3	0.577344	1.36185e-08
CAV2	CTD-2357A8.3	0.637226	1.22208e-10
ITGA4	CTC-529G1.1	0.624652	3.57495e-10
ITGA4	STARD4-AS1	0.746359	8.43553e-16
ITGA4	AC144521.1	0.652321	3.15211e-11
ITGA4	RP11-628E19.2	0.596521	3.34291e-09
ITGA4	RP1-90L6.3	0.573977	1.72666e-08
ITGA4	CTC-458I2.2	0.632312	1.86983e-10
ITGA4	RP11-461F16.3	0.629687	2.33939e-10
ITGA4	RP11-96H19.1	0.601164	2.34607e-09
ITGA4	RP11-403A21.3	0.575635	1.53665e-08
ITGA4	RP11-69I8.3	0.565378	3.12816e-08
KLF7	CELF2-AS1	0.692783	5.5556e-13
SULF2	LINC00877	0.5853	7.68833e-09
SULF2	RP11-160E2.21	0.561715	4.00879e-08
SULF2	ZNF883	0.638788	1.06586e-10
GOLGA8O	RP11-403I13.8	0.572627	1.89766e-08
GOLGA8O	RP11-640M9.1	0.653265	2.88864e-11
GOLGA8O	RP11-1000B6.3	0.873788	9.09724e-27
GOLGA8O	AC026150.8	0.908415	4.89298e-32
GOLGA8O	RP11-461F16.3	0.654965	2.46671e-11
GOLGA8O	LINC00623	0.634616	1.53325e-10
GOLGA8R	RP11-403I13.8	0.590988	5.06048e-09
GOLGA8R	CTC-458I2.2	0.582579	9.36509e-09
GOLGA8R	RP11-640M9.1	0.683947	1.41806e-12
GOLGA8R	RP11-269F21.3	0.55085	8.22289e-08
GOLGA8R	RP11-1000B6.3	0.901473	7.9194e-31
GOLGA8R	AC026150.8	0.924686	2.70122e-35
GOLGA8R	RP11-461F16.3	0.681666	1.79664e-12
GOLGA8R	RP11-353N4.4	0.559593	4.62225e-08
GOLGA8R	LINC00623	0.67624	3.12792e-12
GOLGA8R	LINC01071	0.581586	1.00592e-08
CDH4	PCDH9-AS2	0.623312	3.99672e-10
CDH4	RP11-624M8.1	0.55019	8.58294e-08
CDH4	AC131097.3	0.552707	7.28596e-08
CDH4	RP1-122P22.2	0.589405	5.68997e-09
CDH4	RP11-527H14.4	0.695867	3.97406e-13
CDH4	RP11-728K20.2	0.625023	3.46588e-10
CDH4	RP11-260O18.1	0.55985	4.54332e-08
CDH4	RP11-527H14.6	0.687164	1.01204e-12
CDH4	RP11-314O13.1	0.564037	3.42675e-08
CDH4	RP11-1157N2-B.2	0.663875	1.06008e-11
BACH2	RP3-512E2.2	0.852711	2.85389e-24
FUT8	CTD-2201I18.1	0.586521	7.03322e-09
FUT8	AC018462.2	0.555536	6.0509e-08
FAM171A1	RP11-395G23.3	0.568859	2.46446e-08
FAM171A1	RP11-25G10.2	0.793856	5.81519e-19
RAB27B	AC114808.2	0.593438	4.2159e-09
RAB27B	RP13-895J2.7	0.681425	1.84194e-12
RAB27B	RP11-723O4.2	0.684329	1.36268e-12
SPATA31A7	CTB-43E15.3	0.652933	2.97883e-11
SPATA31A7	RP11-18H21.1	0.561735	4.00344e-08
SPATA31A7	AC016735.1	0.719222	2.7236e-14
KCNQ5	KCNQ5-AS1	0.795345	4.49057e-19
KCNQ5	KCNQ5-IT1	0.794273	5.41051e-19
FHIT	CTD-2234B20.1	0.649318	4.15253e-11
FHIT	RP11-638F5.1	0.676141	3.15909e-12
FHIT	RP11-57H14.2	0.598132	2.95829e-09
FHIT	CCND2-AS2	0.560893	4.23666e-08
FHIT	RP11-186F10.2	0.599178	2.73169e-09
FHIT	AC144521.1	0.597878	3.01594e-09
FHIT	ZEB2-AS1	0.622919	4.12919e-10
FHIT	CTD-2341M24.1	0.568278	2.56499e-08
FHIT	ZMIZ1-AS1	0.649877	3.94577e-11
SYT9	AC007319.1	0.563963	3.44409e-08
SYT9	RP11-480D4.2	0.638228	1.11951e-10
SYT9	RP1-90L6.2	0.577532	1.34379e-08
SYT9	RP11-462G22.1	0.596051	3.46382e-09
SYT9	RP11-624M8.1	0.592165	4.63626e-09
SYT9	RP1-293L8.2	0.567337	2.73623e-08
SYT9	LINC00487	0.628961	2.48811e-10
SYT9	RP11-480D4.1	0.591083	5.02513e-09
SYT9	PCDH9-AS3	0.563678	3.51126e-08
SYT9	AF131215.3	0.554856	6.32835e-08
SYT9	RP11-554F20.1	0.602064	2.18898e-09
SYT9	SNORD116-20	0.562781	3.73096e-08
SYT9	CTD-2516F10.2	0.568974	2.44488e-08
SYT9	RGMB-AS1	0.555181	6.1944e-08
PTPRG	RP11-789C17.3	0.571202	2.0956e-08
PTPRG	RP1-293L8.2	0.578086	1.29192e-08
PTPRG	SLIT2-IT1	0.589656	5.58551e-09
PTPRG	PTPRG-AS1	0.855785	1.30703e-24
PTPRG	AC099754.1	0.640985	8.78141e-11
PTPRG	RP11-125B21.2	0.553735	6.81192e-08
VSTM4	RP1-90L6.2	0.558546	4.95658e-08
VSTM4	SLC9A9-AS1	0.58023	1.10869e-08
SMOC2	CTD-3032H12.1	0.640275	9.35088e-11
SMOC2	RP1-167F1.2	0.596887	3.25144e-09
SMOC2	GDNF-AS1	0.625741	3.26377e-10
SMOC2	AC011284.3	0.641162	8.64492e-11
SMOC2	GFOD1-AS1	0.612223	9.86208e-10
SMOC2	RP11-267C16.1	0.762524	8.57469e-17
SMOC2	RP11-417E7.2	0.641811	8.16209e-11
SMOC2	RP11-91I20.2	0.570676	2.17343e-08
SMOC2	SERTAD4-AS1	0.711463	6.83326e-14
SMOC2	SATB2-AS1	0.71091	7.28787e-14
SMOC2	RP11-676J12.8	0.562571	3.78417e-08
SMOC2	RP11-171A24.3	0.773547	1.62136e-17
SMOC2	AP001422.3	0.578524	1.25232e-08
GLI3	LINC00707	0.550688	8.3098e-08
GLI3	AC104820.2	0.576239	1.47258e-08
BCAS3	SENCR	0.562637	3.76735e-08
BCAS3	RP11-305F18.1	0.639829	9.72581e-11
BCAS3	RP11-16L9.4	0.576906	1.40475e-08
BCAS3	CTD-2187J20.1	0.604786	1.77286e-09
BCAS3	RP11-735G4.1	0.683299	1.51712e-12
BCAS3	LINC00511	0.712655	5.94454e-14
BCAS3	RP1-90L6.2	0.693059	5.39226e-13
BCAS3	RP11-545D19.1	0.719747	2.55648e-14
BCAS3	RP11-359D14.2	0.577598	1.33749e-08
BCAS3	AC113607.3	0.790324	1.06495e-18
BCAS3	SMAD1-AS2	0.570585	2.18725e-08
BCAS3	PCDH9-AS2	0.699707	2.60344e-13
BCAS3	RP11-638F5.1	0.610927	1.09355e-09
BCAS3	SPANXA2-OT1	0.633304	1.71699e-10
BCAS3	RP11-378A12.1	0.592081	4.66555e-09
BCAS3	AC131097.3	0.579716	1.15025e-08
BCAS3	SNHG14	0.61831	6.03345e-10
BCAS3	RP1-122P22.2	0.665457	9.09723e-12
BCAS3	CCND2-AS2	0.6597	1.58032e-11
BCAS3	RP11-382E9.1	0.588553	6.05902e-09
BCAS3	RP11-298A8.2	0.595084	3.72562e-09
BCAS3	PCDH9-AS4	0.604424	1.82346e-09
BCAS3	RP1-283K11.2	0.825349	1.48122e-21
BCAS3	LINC00399	0.691873	6.12824e-13
BCAS3	CTB-49A3.5	0.622912	4.13158e-10
BCAS3	STARD4-AS1	0.575758	1.52343e-08
BCAS3	RP3-323P13.2	0.876838	3.63674e-27
BCAS3	RP11-367F23.2	0.733713	4.48908e-15
BCAS3	SLC9A9-AS1	0.68647	1.08889e-12
BCAS3	NAMA	0.607461	1.43817e-09
BCAS3	RP1-90L6.3	0.636381	1.31556e-10
BCAS3	RP11-62C7.2	0.675191	3.47695e-12
BCAS3	RP11-649G15.2	0.63756	1.18698e-10
BCAS3	RP11-446J8.1	0.558585	4.94361e-08
BCAS3	RP11-480D4.1	0.739563	2.0965e-15
BCAS3	PCDH9-AS3	0.720633	2.29661e-14
BCAS3	RP11-385J1.2	0.598641	2.84587e-09
BCAS3	LINC01115	0.843415	2.72749e-23
BCAS3	RP11-369K17.1	0.55749	5.31712e-08
BCAS3	AC107072.2	0.616552	6.96061e-10
BCAS3	LINC01091	0.634221	1.5864e-10
BCAS3	RP1-30E17.2	0.582193	9.62915e-09
BCAS3	AC093642.3	0.762385	8.75237e-17
BCAS3	RP11-138M12.1	0.558168	5.08301e-08
BCAS3	LINC00238	0.588914	5.89983e-09
BCAS3	RP11-523O18.5	0.594546	3.87964e-09
BCAS3	RP11-332H18.5	0.866628	7.15115e-26
BCAS3	RP11-35O15.1	0.557019	5.48571e-08
BCAS3	RGMB-AS1	0.671544	5.00628e-12
BCAS3	CTD-2528A14.1	0.584567	8.10959e-09
BCAS3	RP11-166A12.1	0.592351	4.57267e-09
BCAS3	RP11-328D5.1	0.57622	1.47453e-08
BCAS3	AC114877.3	0.646448	5.38858e-11
BCAS3	RP11-1078H9.1	0.642961	7.36774e-11
BCAS3	RP11-486O13.2	0.800508	1.8014e-19
BCAS3	RP11-15H20.6	0.578672	1.23919e-08
BCAS3	RP11-563N6.6	0.685107	1.25627e-12
BCAS3	WI2-85898F10.1	0.646415	5.40455e-11
BCAS3	AC108462.1	0.742877	1.34961e-15
PTPRC	C9orf106	0.611097	1.07887e-09
WDR60	RP11-53B2.3	0.754326	2.79465e-16
WDR60	RP11-691H4.4	0.569095	2.42462e-08
WDR60	RP11-53B2.1	0.62833	2.62473e-10
WDR60	DIO3OS	0.794875	4.87309e-19
WDR60	IFNG-AS1	0.594803	3.80547e-09
WDR60	RP11-582J16.4	0.688778	8.53069e-13
AKAP13	RP5-1063M23.1	0.574162	1.70439e-08
AKAP13	RP11-13K12.2	0.566524	2.89295e-08
AKAP13	RP11-158M2.2	0.757901	1.679e-16
AKAP13	RP11-815J21.1	0.837634	1.03251e-22
SPTLC3	RP11-735G4.1	0.599144	2.7387e-09
SPTLC3	RP1-90L6.2	0.567702	2.66856e-08
SPTLC3	RP11-624M8.1	0.57259	1.90259e-08
SPTLC3	RP1-283K11.2	0.621175	4.76962e-10
SPTLC3	RP3-323P13.2	0.624733	3.55069e-10
SPTLC3	RP11-367F23.2	0.593976	4.04936e-09
SPTLC3	RP11-480D4.1	0.621879	4.50044e-10
SPTLC3	LINC01115	0.609761	1.19952e-09
SPTLC3	SNORD116-20	0.605914	1.62348e-09
SPTLC3	RP11-332H18.5	0.608194	1.3576e-09
SPTLC3	RGMB-AS1	0.597078	3.20471e-09
SPTLC3	RP11-486O13.2	0.557437	5.33584e-08
SEMA5A	AC007319.1	0.67003	5.81612e-12
SEMA5A	RP3-525N10.2	0.730176	7.04585e-15
SEMA5A	SENCR	0.573587	1.77446e-08
SEMA5A	RP11-305F18.1	0.698702	2.90991e-13
SEMA5A	RP11-16L9.4	0.655476	2.35175e-11
SEMA5A	CTD-2187J20.1	0.813831	1.49968e-20
SEMA5A	RP11-735G4.1	0.820978	3.6359e-21
SEMA5A	RP11-480D4.2	0.664686	9.80201e-12
SEMA5A	RP1-90L6.2	0.677006	2.89437e-12
SEMA5A	RP11-545D19.1	0.669406	6.18471e-12
SEMA5A	RP11-359D14.2	0.648318	4.5485e-11
SEMA5A	AC113607.3	0.665106	9.41224e-12
SEMA5A	SMAD1-AS2	0.666997	7.83184e-12
SEMA5A	PCDH9-AS2	0.77083	2.46561e-17
SEMA5A	RP11-624M8.1	0.671055	5.25548e-12
SEMA5A	RP1-122P22.2	0.633793	1.64611e-10
SEMA5A	RP11-382E9.1	0.673325	4.19245e-12
SEMA5A	PCDH9-AS4	0.611363	1.05626e-09
SEMA5A	FGF13-AS1	0.636574	1.29363e-10
SEMA5A	RP1-283K11.2	0.749706	5.33011e-16
SEMA5A	LINC00399	0.732903	4.98076e-15
SEMA5A	RP3-323P13.2	0.755059	2.5193e-16
SEMA5A	RP11-367F23.2	0.852239	3.21222e-24
SEMA5A	SLC9A9-AS1	0.649647	4.02946e-11
SEMA5A	RP1-293L8.2	0.61875	5.82041e-10
SEMA5A	NAMA	0.551801	7.72989e-08
SEMA5A	RP11-628E19.2	0.572411	1.92643e-08
SEMA5A	RP11-62C7.2	0.674053	3.89795e-12
SEMA5A	RP11-446J8.1	0.577362	1.36005e-08
SEMA5A	RP11-480D4.1	0.819621	4.78166e-21
SEMA5A	PCDH9-AS3	0.714594	4.73192e-14
SEMA5A	RP11-385J1.2	0.623904	3.8047e-10
SEMA5A	RP11-527H14.6	0.570632	2.18009e-08
SEMA5A	LINC01115	0.773983	1.51502e-17
SEMA5A	RP11-369K17.1	0.576064	1.4909e-08
SEMA5A	RP11-211N8.2	0.607948	1.38417e-09
SEMA5A	AC107072.2	0.643033	7.32077e-11
SEMA5A	RP1-30E17.2	0.743751	1.20033e-15
SEMA5A	AC093642.3	0.756083	2.17809e-16
SEMA5A	RP11-138M12.1	0.651765	3.31807e-11
SEMA5A	RP11-332H18.5	0.799971	1.98307e-19
SEMA5A	RP11-35O15.1	0.673492	4.12322e-12
SEMA5A	RGMB-AS1	0.792126	7.83266e-19
SEMA5A	CTD-2528A14.1	0.595746	3.54432e-09
SEMA5A	RP11-166A12.1	0.610744	1.10953e-09
SEMA5A	AC114877.3	0.755603	2.33216e-16
SEMA5A	RP11-43N5.1	0.571382	2.06954e-08
SEMA5A	RP5-1024N4.4	0.565735	3.05297e-08
SEMA5A	RP11-1078H9.1	0.65591	2.2583e-11
SEMA5A	RP11-80H8.3	0.555462	6.08071e-08
SEMA5A	RP11-486O13.2	0.821958	2.9791e-21
SEMA5A	RP11-676J15.1	0.633672	1.66336e-10
SEMA5A	RP11-563N6.6	0.599958	2.57347e-09
SEMA5A	AC108462.1	0.704813	1.46795e-13
RGMA	AC007319.1	0.709712	8.37497e-14
RGMA	SENCR	0.555569	6.03779e-08
RGMA	RP11-305F18.1	0.618112	6.13172e-10
RGMA	CTD-2187J20.1	0.685207	1.24322e-12
RGMA	RP11-735G4.1	0.574196	1.70037e-08
RGMA	RP11-480D4.2	0.574196	1.70029e-08
RGMA	RP11-82O18.2	0.601405	2.30291e-09
RGMA	RP11-266O8.1	0.787869	1.61054e-18
RGMA	RP1-90L6.2	0.585053	7.82802e-09
RGMA	RP11-545D19.1	0.647961	4.69838e-11
RGMA	RP11-359D14.2	0.728821	8.35749e-15
RGMA	CTD-2313P7.1	0.572051	1.97536e-08
RGMA	SMAD1-AS2	0.723093	1.70153e-14
RGMA	PCDH9-AS2	0.663277	1.12292e-11
RGMA	RP11-462G22.1	0.690154	7.36789e-13
RGMA	RP11-624M8.1	0.605122	1.72707e-09
RGMA	SMAD1-AS1	0.741138	1.70193e-15
RGMA	RP11-470P21.2	0.575235	1.5806e-08
RGMA	AC131097.3	0.679922	2.14996e-12
RGMA	RP1-122P22.2	0.692248	5.88555e-13
RGMA	CTA-221G9.11	0.551273	7.99981e-08
RGMA	PCDH9-AS4	0.75452	2.71904e-16
RGMA	FGF13-AS1	0.624618	3.58491e-10
RGMA	RP1-293L8.2	0.62159	4.60936e-10
RGMA	LINC00487	0.626823	2.98043e-10
RGMA	RP11-62C7.2	0.743327	1.27073e-15
RGMA	RP11-480D4.1	0.553266	7.02449e-08
RGMA	PCDH9-AS3	0.714737	4.65265e-14
RGMA	RP11-85B7.2	0.593857	4.0854e-09
RGMA	RP11-484L8.1	0.56403	3.42836e-08
RGMA	RP11-211N8.2	0.621053	4.81818e-10
RGMA	AC107072.2	0.716695	3.68729e-14
RGMA	AC093642.3	0.757273	1.83759e-16
RGMA	RP11-332H18.5	0.647695	4.81339e-11
RGMA	RP11-35O15.1	0.610915	1.09456e-09
RGMA	RP11-725G5.2	0.599505	2.66424e-09
RGMA	RGMB-AS1	0.736842	2.99505e-15
RGMA	CTD-2528A14.1	0.567076	2.78561e-08
RGMA	RP11-166A12.1	0.740265	1.91083e-15
RGMA	RP11-1078H9.1	0.715792	4.10576e-14
RGMA	RP11-486O13.2	0.731592	5.88743e-15
RGMA	RP11-15H20.6	0.637053	1.24065e-10
RGMA	RP11-676J15.1	0.707667	1.06005e-13
RGMA	AC108462.1	0.627638	2.78255e-10
XKR3	LINC00882	0.840549	5.31294e-23
XKR3	TPTEP1	0.633069	1.75209e-10
CDH12	AC009499.1	0.718783	2.87165e-14
CDH12	LINC01091	0.639404	1.00965e-10
CDH12	RP11-440G5.2	0.618751	5.81996e-10
MYO16	C9orf106	0.691952	6.07617e-13
MYO16	RP11-206L10.3	0.558589	4.94245e-08
MYO16	AC015969.3	0.563366	3.58611e-08
GALR1	AC113607.3	0.659156	1.66379e-11
GALR1	RP1-283K11.2	0.662144	1.25189e-11
GALR1	RP3-323P13.2	0.678435	2.50301e-12
GALR1	RP11-367F23.2	0.583729	8.61777e-09
GALR1	RP11-480D4.1	0.559983	4.50316e-08
GALR1	LINC01115	0.70428	1.55933e-13
GALR1	AC009499.1	0.576943	1.40106e-08
GALR1	LINC01091	0.59913	2.74154e-09
GALR1	RP11-332H18.5	0.620817	4.91254e-10
GALR1	RP11-440G5.2	0.572152	1.96161e-08
GALR1	RP11-486O13.2	0.561839	3.97549e-08
TASP1	RP11-638F5.1	0.564289	3.36861e-08
TASP1	RP11-250B2.3	0.618064	6.15572e-10
TASP1	STARD4-AS1	0.556766	5.57876e-08
TASP1	ZEB2-AS1	0.55249	7.38976e-08
TASP1	RP11-523O18.5	0.553526	6.90592e-08
TASP1	RP11-563N6.6	0.579816	1.14207e-08
ARRDC4	RP11-677M14.3	0.560026	4.49022e-08
CSMD1	RP11-366M4.3	0.642115	7.94437e-11
CSMD1	AC078883.4	0.603884	1.90157e-09
CSMD1	RP11-125B21.2	0.592618	4.48217e-09
EDN2	RP11-713N11.5	0.622031	4.44426e-10
ROR2	AC007319.1	0.675914	3.23251e-12
ROR2	SENCR	0.610997	1.08748e-09
ROR2	RP11-305F18.1	0.75503	2.52978e-16
ROR2	CTC-523E23.4	0.62	5.25403e-10
ROR2	RP11-735G4.1	0.655834	2.27449e-11
ROR2	RP11-134O21.1	0.553315	7.00203e-08
ROR2	RP11-359D14.2	0.5603	4.40865e-08
ROR2	AC113607.3	0.658484	1.77311e-11
ROR2	SMAD1-AS2	0.551713	7.77428e-08
ROR2	PCDH9-AS2	0.704822	1.46642e-13
ROR2	AF127936.3	0.558218	5.0661e-08
ROR2	RP11-462G22.1	0.612311	9.79345e-10
ROR2	RP11-624M8.1	0.753883	2.97485e-16
ROR2	RP11-378A12.1	0.599233	2.72011e-09
ROR2	RP1-122P22.2	0.723307	1.65746e-14
ROR2	RP11-382E9.1	0.56008	4.4739e-08
ROR2	PCDH9-AS4	0.649278	4.16769e-11
ROR2	FGF13-AS1	0.611422	1.05133e-09
ROR2	RP1-283K11.2	0.595135	3.71134e-09
ROR2	RP3-323P13.2	0.651929	3.26807e-11
ROR2	RP11-367F23.2	0.706459	1.21725e-13
ROR2	SLC9A9-AS1	0.56098	4.21198e-08
ROR2	RP11-728K20.2	0.569492	2.35914e-08
ROR2	RP1-293L8.2	0.650966	3.57084e-11
ROR2	NAMA	0.76708	4.3559e-17
ROR2	RP11-260O18.1	0.69699	3.51428e-13
ROR2	RP11-62C7.2	0.626881	2.96574e-10
ROR2	RP11-446J8.1	0.579073	1.20428e-08
ROR2	RP11-480D4.1	0.721852	1.9803e-14
ROR2	PCDH9-AS3	0.650125	3.85715e-11
ROR2	RP11-575A19.2	0.584157	8.35457e-09
ROR2	RP11-475I24.3	0.554313	6.55846e-08
ROR2	RP11-85B7.2	0.572445	1.92191e-08
ROR2	RP11-677M14.3	0.58676	6.91089e-09
ROR2	RP11-211N8.2	0.610744	1.10961e-09
ROR2	RP1-30E17.2	0.648934	4.30038e-11
ROR2	AC093642.3	0.631266	2.04497e-10
ROR2	RP11-138M12.1	0.714337	4.87771e-14
ROR2	RP11-436M15.3	0.551421	7.92333e-08
ROR2	RP11-35O15.1	0.784079	3.01845e-18
ROR2	RGMB-AS1	0.679733	2.19185e-12
ROR2	RP11-166A12.1	0.674488	3.73145e-12
ROR2	RP5-1077I2.3	0.592977	4.36369e-09
ROR2	RP11-314O13.1	0.585537	7.55675e-09
ROR2	RP11-358M11.3	0.623442	3.95378e-10
ROR2	RP11-486O13.2	0.613474	8.92241e-10
ROR2	RP11-15H20.6	0.606024	1.60963e-09
ROR2	RP11-676J15.1	0.69495	4.39244e-13
ROR2	RP11-563N6.6	0.607451	1.43928e-09
SHROOM3	AC007319.1	0.611885	1.01322e-09
SHROOM3	RP11-305F18.1	0.623176	4.04199e-10
SHROOM3	CTD-2187J20.1	0.648797	4.35466e-11
SHROOM3	RP11-735G4.1	0.688648	8.64977e-13
SHROOM3	RP11-480D4.2	0.595251	3.67907e-09
SHROOM3	LINC00511	0.712563	6.00848e-14
SHROOM3	RP11-266O8.1	0.61347	8.92554e-10
SHROOM3	RP1-90L6.2	0.654695	2.52949e-11
SHROOM3	RP11-545D19.1	0.630182	2.24308e-10
SHROOM3	RP11-359D14.2	0.969692	1.00015e-50
SHROOM3	SMAD1-AS2	0.653151	2.91944e-11
SHROOM3	PCDH9-AS2	0.70304	1.79354e-13
SHROOM3	RP11-462G22.1	0.579108	1.20122e-08
SHROOM3	SPANXA2-OT1	0.57026	2.23701e-08
SHROOM3	RP11-624M8.1	0.59902	2.76483e-09
SHROOM3	SMAD1-AS1	0.590721	5.16207e-09
SHROOM3	AC131097.3	0.585777	7.4257e-09
SHROOM3	SNHG14	0.556236	5.77786e-08
SHROOM3	RP1-122P22.2	0.706096	1.26866e-13
SHROOM3	CCND2-AS2	0.588733	5.97904e-09
SHROOM3	PCDH9-AS4	0.670702	5.44202e-12
SHROOM3	FGF13-AS1	0.589865	5.49965e-09
SHROOM3	RP1-283K11.2	0.575569	1.54386e-08
SHROOM3	LINC00399	0.626017	3.18907e-10
SHROOM3	RP3-323P13.2	0.602585	2.10271e-09
SHROOM3	RP11-367F23.2	0.562351	3.84085e-08
SHROOM3	SLC9A9-AS1	0.624366	3.66127e-10
SHROOM3	RP1-293L8.2	0.590039	5.42955e-09
SHROOM3	LINC00487	0.569034	2.43487e-08
SHROOM3	RP11-62C7.2	0.668837	6.54053e-12
SHROOM3	RP11-446J8.1	0.613735	8.73753e-10
SHROOM3	RP11-480D4.1	0.602928	2.04777e-09
SHROOM3	AC011284.3	0.623303	3.99982e-10
SHROOM3	PCDH9-AS3	0.7093	8.78358e-14
SHROOM3	LINC01115	0.621911	4.48867e-10
SHROOM3	AC107072.2	0.89979	1.50784e-30
SHROOM3	AC093642.3	0.720571	2.31381e-14
SHROOM3	RP11-138M12.1	0.601913	2.21467e-09
SHROOM3	RP11-332H18.5	0.704163	1.58009e-13
SHROOM3	RP11-35O15.1	0.579352	1.18053e-08
SHROOM3	RGMB-AS1	0.738703	2.34788e-15
SHROOM3	CTD-2528A14.1	0.703025	1.79659e-13
SHROOM3	RP11-166A12.1	0.633694	1.66023e-10
SHROOM3	AC114877.3	0.693139	5.34592e-13
SHROOM3	RP11-43N5.1	0.602604	2.09972e-09
SHROOM3	RP11-1078H9.1	0.654512	2.57295e-11
SHROOM3	RP11-80H8.3	0.556414	5.70994e-08
SHROOM3	RP11-486O13.2	0.703698	1.66528e-13
SHROOM3	RP11-15H20.6	0.632608	1.82288e-10
SHROOM3	RP11-676J15.1	0.564594	3.29975e-08
SHROOM3	RP11-563N6.6	0.618683	5.85244e-10
SHROOM3	LINC00930	0.55776	5.22277e-08
SHROOM3	AC108462.1	0.590339	5.31011e-09
SYNE3	LINC00630	0.663312	1.11909e-11
SYNE3	CTD-2281E23.1	0.573082	1.83832e-08
SYNE3	AC007255.8	0.590271	5.33699e-09
SYNE3	KB-1460A1.1	0.730466	6.79186e-15
SYNE3	RP11-38L15.3	0.615171	7.78372e-10
SYNE3	RP11-473E2.2	0.715542	4.22948e-14
SYNE3	RP13-297E16.4	0.587574	6.51115e-09
SYNE3	PHKA2-AS1	0.69469	4.5187e-13
SYNE3	CTD-2023N9.1	0.611165	1.07306e-09
SYNE3	LL0XNC01-237H1.2	0.658183	1.82408e-11
SYNE3	RP11-114N19.3	0.762784	8.25358e-17
SYNE3	AC109826.1	0.610728	1.11103e-09
SYNE3	RP11-473E2.3	0.619667	5.39935e-10
PCDH9	SENCR	0.575487	1.55282e-08
PCDH9	RP11-204M4.2	0.570998	2.1255e-08
PCDH9	RP11-305F18.1	0.691715	6.23276e-13
PCDH9	RP11-735G4.1	0.584414	8.19986e-09
PCDH9	RP1-90L6.2	0.59421	3.97882e-09
PCDH9	RP11-292F22.5	0.584733	8.01242e-09
PCDH9	PCDH9-AS2	0.73416	4.23863e-15
PCDH9	AF127936.3	0.580384	1.09653e-08
PCDH9	AF127936.5	0.661578	1.32152e-11
PCDH9	RP11-624M8.1	0.599373	2.69114e-09
PCDH9	RP1-122P22.2	0.581462	1.01494e-08
PCDH9	SLC9A9-AS2	0.664265	1.02093e-11
PCDH9	PCDH9-AS4	0.609051	1.26882e-09
PCDH9	SLC9A9-AS1	0.659326	1.63734e-11
PCDH9	RP11-527H14.4	0.658977	1.69225e-11
PCDH9	RP11-345M22.1	0.557954	5.15592e-08
PCDH9	RP11-446J8.1	0.636721	1.27709e-10
PCDH9	PCDH9-AS3	0.675348	3.42224e-12
PCDH9	RP11-475I24.3	0.665944	8.67672e-12
PCDH9	RP11-527H14.6	0.737502	2.7477e-15
PCDH9	RP11-211N8.2	0.622814	4.16554e-10
PCDH9	RP11-80H8.4	0.669371	6.206e-12
PCDH9	RGMB-AS1	0.689646	7.7778e-13
PCDH9	AC099754.1	0.555513	6.06039e-08
PCDH9	RP11-145E17.2	0.626065	3.17609e-10
PCDH9	AC114877.3	0.606567	1.54267e-09
PCDH9	RP11-314O13.1	0.610084	1.16922e-09
PCDH9	RP11-125B21.2	0.612396	9.72709e-10
PCDH9	RP11-80H8.3	0.570432	2.2106e-08
PCDH9	RP11-15H20.6	0.577518	1.3451e-08
PCDH9	RP11-676J15.1	0.554126	6.63935e-08
PCDH9	RP11-563N6.6	0.669904	5.88882e-12
PCDH9	RP11-1157N2-B.2	0.619056	5.6764e-10
PCDH9	AC108462.1	0.60534	1.69787e-09
TRIML1	AC007319.1	0.59034	5.30961e-09
TRIML1	RP11-16L9.4	0.578786	1.22913e-08
TRIML1	CTD-2187J20.1	0.630859	2.11734e-10
TRIML1	RP11-735G4.1	0.634396	1.56267e-10
TRIML1	RP11-480D4.2	0.71476	4.63962e-14
TRIML1	RP1-90L6.2	0.58987	5.49781e-09
TRIML1	RP11-359D14.2	0.570597	2.18535e-08
TRIML1	RP11-462G22.1	0.585426	7.61847e-09
TRIML1	RP11-624M8.1	0.643961	6.73859e-11
TRIML1	RP11-382E9.1	0.565169	3.17305e-08
TRIML1	FGF13-AS1	0.674909	3.5769e-12
TRIML1	LINC00399	0.609648	1.21037e-09
TRIML1	RP1-293L8.2	0.660547	1.45803e-11
TRIML1	RP11-480D4.1	0.593803	4.10208e-09
TRIML1	PCDH9-AS3	0.584882	7.926e-09
TRIML1	AC093642.3	0.573692	1.76152e-08
TRIML1	RP11-332H18.5	0.57405	1.71781e-08
TRIML1	RP11-725G5.2	0.596952	3.2354e-09
TRIML1	RGMB-AS1	0.669987	5.84041e-12
TRIML1	RP5-1024N4.4	0.640478	9.18434e-11
TRIML1	RP11-1078H9.1	0.580872	1.05889e-08
TRIML1	RP11-486O13.2	0.576825	1.41278e-08
SEPT9	RP11-53B2.4	0.562204	3.87891e-08
DTD1	RP11-361F15.2	0.611055	1.08245e-09
RBM19	RP11-305F18.1	0.586917	6.83218e-09
RBM19	CASK-AS1	0.576602	1.43531e-08
RBM19	RP11-545D19.1	0.559363	4.69365e-08
RBM19	AC113607.3	0.826289	1.21711e-21
RBM19	SMAD1-AS2	0.583759	8.599e-09
RBM19	PCDH9-AS2	0.661751	1.29987e-11
RBM19	RP11-378A12.1	0.554628	6.42398e-08
RBM19	RP11-57H14.2	0.558461	4.98483e-08
RBM19	AC131097.3	0.62401	3.7715e-10
RBM19	RP1-122P22.2	0.61074	1.10994e-09
RBM19	CCND2-AS2	0.648379	4.52343e-11
RBM19	RP11-250B2.3	0.683473	1.48983e-12
RBM19	RP1-283K11.2	0.740624	1.82212e-15
RBM19	RP3-323P13.2	0.767643	4.00219e-17
RBM19	RP11-367F23.2	0.617443	6.47473e-10
RBM19	SLC9A9-AS1	0.551018	8.1337e-08
RBM19	AC144521.1	0.58953	5.63758e-09
RBM19	RP11-728K20.2	0.610866	1.09891e-09
RBM19	NAMA	0.742175	1.48249e-15
RBM19	RP11-446J8.1	0.552983	7.15549e-08
RBM19	RP11-480D4.1	0.676916	2.92078e-12
RBM19	PCDH9-AS3	0.642824	7.45842e-11
RBM19	LINC01115	0.599718	2.62113e-09
RBM19	AC009499.1	0.646716	5.25948e-11
RBM19	LINC01091	0.71058	7.57248e-14
RBM19	RP1-30E17.2	0.613554	8.86565e-10
RBM19	AC093642.3	0.695348	4.20584e-13
RBM19	SNORD116-20	0.573051	1.84222e-08
RBM19	RP11-523O18.5	0.624918	3.49627e-10
RBM19	RP11-332H18.5	0.606558	1.54377e-09
RBM19	RP11-35O15.1	0.588477	6.09294e-09
RBM19	RP11-440G5.2	0.579231	1.19079e-08
RBM19	RP11-166A12.1	0.598661	2.84139e-09
RBM19	RP11-358M11.3	0.590352	5.30501e-09
RBM19	RP11-486O13.2	0.620817	4.91274e-10
RBM19	RP11-563N6.6	0.673227	4.23412e-12
RBM19	WI2-85898F10.1	0.580052	1.12295e-08
USP25	RP11-582J16.4	0.653195	2.90743e-11
APBA1	CTC-523E23.4	0.637113	1.23417e-10
APBA1	RP11-462G22.1	0.710794	7.38696e-14
APBA1	RP11-470P21.2	0.759252	1.38193e-16
APBA1	RP1-122P22.2	0.56433	3.35928e-08
APBA1	LINC01006	0.609563	1.21851e-09
SDCCAG8	LINC00869	0.561015	4.20218e-08
SDCCAG8	RP11-403I13.8	0.617306	6.54722e-10
SDCCAG8	RP11-134G8.7	0.661391	1.34527e-11
SDCCAG8	CTC-458I2.2	0.651451	3.41521e-11
SDCCAG8	RP11-96H19.1	0.574037	1.71942e-08
SDCCAG8	RP11-353N4.4	0.589796	5.52796e-09
SDCCAG8	LINC01071	0.575544	1.54656e-08
MAP3K9	RP11-30P6.6	0.558076	5.11402e-08
MAP3K9	CTD-2540L5.6	0.562659	3.76184e-08
LSAMP	MIR17HG	0.590233	5.35199e-09
LSAMP	IFNG-AS1	0.585466	7.59607e-09
LSAMP	CTB-118N6.3	0.575066	1.59949e-08
LSAMP	LINC00880	0.748142	6.61156e-16
XKR9	RP11-326E22.1	0.672061	4.75597e-12
XKR9	RP11-565A3.2	0.570326	2.22688e-08
ZNF33B	RP11-23E10.3	0.555205	6.18467e-08
ZNF33B	LL0XNC01-237H1.2	0.561268	4.13116e-08
OXSM	AC144521.1	0.555369	6.11809e-08
SNCAIP	RP3-470B24.5	0.566925	2.81452e-08
PDHX	LL0XNC01-237H1.2	0.636901	1.25722e-10
PDHX	CTD-2201I18.1	0.569446	2.36665e-08
GBX2	RP11-863P13.2	0.638169	1.12532e-10
GBX2	LA16c-444G7.2	0.639002	1.04597e-10
GBX2	CRYM-AS1	0.587232	6.67631e-09
GBX2	RP5-1184F4.5	0.564773	3.2598e-08
ITPR1	EGOT	0.813917	1.47479e-20
CDH18	RP11-147N17.1	0.554163	6.62303e-08
CDH18	RP11-16L9.4	0.563286	3.60558e-08
CDH18	RP11-735G4.1	0.714472	4.8001e-14
CDH18	RP11-480D4.2	0.582023	9.74751e-09
CDH18	RP11-624M8.1	0.714316	4.88949e-14
CDH18	RP11-111F5.3	0.667124	7.73531e-12
CDH18	RP11-305L7.1	0.79188	8.16969e-19
CDH18	RP11-382E9.1	0.702784	1.84591e-13
CDH18	FGF13-AS1	0.72608	1.17703e-14
CDH18	RP11-367F23.2	0.617622	6.38118e-10
CDH18	RP1-293L8.2	0.563137	3.64211e-08
CDH18	RP11-260O18.1	0.613067	9.21835e-10
CDH18	RP11-480D4.1	0.660496	1.46508e-11
CDH18	LINC01006	0.660431	1.47418e-11
CDH18	RP11-575A19.2	0.598203	2.94228e-09
CDH18	RP11-138M12.1	0.73071	6.58515e-15
CDH18	RP11-725G5.2	0.632644	1.81731e-10
CDH18	RP5-1024N4.4	0.796384	3.74386e-19
CDH18	RP11-676J15.1	0.60276	2.0745e-09
SYT14	RP11-100E13.1	0.704416	1.53556e-13
SYT14	LINC01088	0.585864	7.37886e-09
ING1	RP11-231E4.2	0.590939	5.07914e-09
ING1	RP11-542M13.3	0.552953	7.16985e-08
NEK10	LINC00954	0.575003	1.60664e-08
FTCDNL1	CTD-2012J19.3	0.585583	7.53144e-09
FTCDNL1	CTD-2201I18.1	0.55478	6.3598e-08
COL9A1	RP11-20G13.1	0.579125	1.19981e-08
COL9A1	SLC9A9-AS2	0.576276	1.46877e-08
COL9A1	RP11-13K12.5	0.634487	1.55035e-10
COL9A1	LINC01088	0.953965	1.34696e-43
COL9A1	AC099754.1	0.662386	1.22321e-11
COL9A1	AGAP1-IT1	0.567885	2.63525e-08
EYA4	RP11-305F18.1	0.673707	4.03563e-12
EYA4	RP11-16L9.4	0.565589	3.0835e-08
EYA4	RP11-735G4.1	0.771674	2.16609e-17
EYA4	LINC00511	0.635806	1.383e-10
EYA4	CTC-529G1.1	0.579048	1.20641e-08
EYA4	RP1-90L6.2	0.66261	1.19714e-11
EYA4	RP11-545D19.1	0.624195	3.71377e-10
EYA4	RP11-359D14.2	0.557805	5.20719e-08
EYA4	AC113607.3	0.792465	7.38955e-19
EYA4	PCDH9-AS2	0.764436	6.46527e-17
EYA4	SPANXA2-OT1	0.58573	7.45108e-09
EYA4	RP11-624M8.1	0.60705	1.48536e-09
EYA4	RP11-378A12.1	0.578821	1.22611e-08
EYA4	RP11-57H14.2	0.550253	8.5478e-08
EYA4	RP1-122P22.2	0.64861	4.42912e-11
EYA4	CCND2-AS2	0.657352	1.97256e-11
EYA4	RP11-382E9.1	0.669597	6.06973e-12
EYA4	RP11-250B2.3	0.576572	1.43833e-08
EYA4	RP1-283K11.2	0.931635	6.44642e-37
EYA4	LINC00399	0.674104	3.8783e-12
EYA4	CTB-49A3.5	0.583314	8.88053e-09
EYA4	RP3-323P13.2	0.910137	2.36905e-32
EYA4	RP11-367F23.2	0.825579	1.41181e-21
EYA4	SLC9A9-AS1	0.713565	5.34179e-14
EYA4	AC144521.1	0.559256	4.72727e-08
EYA4	NAMA	0.753299	3.22978e-16
EYA4	RP11-328J6.1	0.636538	1.29765e-10
EYA4	RP11-628E19.2	0.580662	1.07496e-08
EYA4	RP1-90L6.3	0.629978	2.28228e-10
EYA4	RP11-62C7.2	0.577506	1.34625e-08
EYA4	RP11-446J8.1	0.637623	1.18041e-10
EYA4	RP11-480D4.1	0.814017	1.44648e-20
EYA4	AC011284.3	0.562604	3.77575e-08
EYA4	PCDH9-AS3	0.725203	1.31216e-14
EYA4	RP11-575A19.2	0.569933	2.28826e-08
EYA4	RP11-385J1.2	0.659279	1.64456e-11
EYA4	LINC01115	0.82438	1.81152e-21
EYA4	AC009499.1	0.594343	3.93913e-09
EYA4	AC107072.2	0.666991	7.83649e-12
EYA4	LINC01091	0.745371	9.64579e-16
EYA4	RP1-30E17.2	0.743303	1.27472e-15
EYA4	AC093642.3	0.704743	1.47962e-13
EYA4	RP11-138M12.1	0.699185	2.75841e-13
EYA4	LINC00238	0.5653	3.14498e-08
EYA4	RP11-523O18.5	0.636488	1.30327e-10
EYA4	RP11-332H18.5	0.783616	3.25621e-18
EYA4	RP11-35O15.1	0.567807	2.64932e-08
EYA4	RP11-440G5.2	0.589283	5.74154e-09
EYA4	RGMB-AS1	0.646346	5.43838e-11
EYA4	CTD-2528A14.1	0.632535	1.83435e-10
EYA4	RP11-328D5.1	0.599694	2.62601e-09
EYA4	AC114877.3	0.694567	4.57924e-13
EYA4	RP5-1024N4.4	0.552997	7.14931e-08
EYA4	RP11-1078H9.1	0.605896	1.62578e-09
EYA4	RP11-80H8.3	0.550366	8.48532e-08
EYA4	RP11-486O13.2	0.71725	3.45101e-14
EYA4	RP11-563N6.6	0.734811	3.89734e-15
EYA4	RP11-1157N2-B.2	0.583653	8.6654e-09
EYA4	AC108462.1	0.680103	2.11033e-12
NREP	AF127936.3	0.776825	9.70301e-18
NREP	AF127936.5	0.578783	1.22937e-08
NREP	RP1-122P22.2	0.621817	4.52378e-10
NREP	SLC9A9-AS2	0.63061	2.16271e-10
NREP	RP11-250B2.3	0.567703	2.66841e-08
NREP	PCDH9-AS4	0.593481	4.2021e-09
NREP	STARD4-AS1	0.630997	2.09248e-10
NREP	PCDH9-AS3	0.567628	2.68211e-08
NREP	RP11-475I24.3	0.572893	1.86273e-08
NREP	RP11-23E10.3	0.612404	9.72064e-10
NREP	RP11-436M15.3	0.567751	2.65965e-08
NREP	RP11-80H8.4	0.610982	1.08879e-09
NREP	SPATA41	0.724855	1.36992e-14
NREP	RP11-145E17.2	0.561853	3.97175e-08
NREP	RP11-82L18.2	0.618513	5.93425e-10
SMARCA2	RP11-53B2.3	0.714063	5.03755e-14
SMARCA2	CELF2-AS1	0.560153	4.45225e-08
SMARCA2	RP11-691H4.4	0.621221	4.75177e-10
SMARCA2	RP11-53B2.4	0.588037	6.29341e-09
SMARCA2	RP11-53B2.5	0.591098	5.01955e-09
SMARCA2	RP11-53B2.1	0.698139	3.09655e-13
SMARCA2	IFNG-AS1	0.655034	2.45085e-11
SMARCA2	RP11-582J16.4	0.68552	1.20317e-12
IFNG	RP11-206L10.3	0.563928	3.4523e-08
IFNG	AC006369.2	0.61321	9.11375e-10
TMEM241	RP11-65J21.3	0.592053	4.67512e-09
TMEM241	MIR29A	0.727714	9.60273e-15
TMEM241	LINC00689	0.677254	2.82247e-12
TMEM241	RP11-17J14.2	0.86147	2.93709e-25
TMEM241	AC004837.5	0.588738	5.97704e-09
TMEM241	RP11-677M14.3	0.620997	4.84023e-10
TMEM241	LA16c-444G7.2	0.562079	3.91183e-08
TMEM241	RP11-308N19.1	0.668494	6.76486e-12
TMEM241	CRYM-AS1	0.551347	7.96166e-08
TMEM241	RP11-35O15.1	0.649008	4.27161e-11
SATB1	RP11-82O18.2	0.559132	4.7668e-08
SATB1	CTC-529G1.1	0.665344	9.1977e-12
SATB1	RP1-90L6.2	0.606541	1.54583e-09
SATB1	RP11-57H14.2	0.631603	1.98684e-10
SATB1	AC131097.3	0.558146	5.09043e-08
SATB1	SNHG14	0.618687	5.85028e-10
SATB1	CCND2-AS2	0.734098	4.27226e-15
SATB1	ANKRD10-IT1	0.627467	2.82298e-10
SATB1	STARD4-AS1	0.575788	1.52018e-08
SATB1	AC144521.1	0.765382	5.61645e-17
SATB1	RP11-628E19.2	0.570955	2.13181e-08
SATB1	RP1-90L6.3	0.666793	7.9888e-12
HS3ST4	AC007255.8	0.68995	7.53006e-13
HS3ST4	CTD-2023N9.1	0.576965	1.39885e-08
PTPRM	RP11-429E11.2	0.565934	3.0119e-08
PTPRM	RP11-366M4.3	0.633947	1.6245e-10
PTPRM	RP11-111F5.4	0.578564	1.24877e-08
PTPRM	RP11-678G15.2	0.665862	8.74665e-12
PTPRM	RP11-13K12.2	0.651202	3.49448e-11
PTPRM	RP11-267C16.1	0.594392	3.92484e-09
PTPRM	CRYM-AS1	0.619163	5.62688e-10
PTPRM	AGAP1-IT1	0.5875	6.54624e-09
PTPRM	RP11-125B21.2	0.576677	1.42769e-08
SPATA6	RP11-25G10.2	0.569391	2.37554e-08
KCNH5	CTB-43E15.3	0.643733	6.87711e-11
KCNH5	AC016735.1	0.716631	3.71561e-14
FNDC1	CTC-523E23.4	0.584032	8.43073e-09
FNDC1	AC093642.4	0.561299	4.12261e-08
FNDC1	RP11-85B7.2	0.574638	1.64842e-08
FNDC1	RP11-417E7.2	0.736399	3.17263e-15
FNDC1	SERTAD4-AS1	0.766997	4.41041e-17
SOX11	RP11-20G13.1	0.596872	3.25507e-09
SOX11	RP11-13K12.5	0.560969	4.21502e-08
SOX11	LINC01088	0.922536	7.98205e-35
SOX11	AC099754.1	0.642576	7.62481e-11
ZMYND11	AC003090.1	0.552252	7.50593e-08
ZMYND11	LL0XNC01-237H1.2	0.647115	5.07299e-11
XKR4	RP11-147N17.1	0.589866	5.49914e-09
XKR4	RP11-735G4.1	0.719066	2.77526e-14
XKR4	RP11-480D4.2	0.703785	1.64902e-13
XKR4	RP11-264E18.1	0.563827	3.476e-08
XKR4	LINC00511	0.557365	5.36136e-08
XKR4	CTC-529G1.1	0.690093	7.41562e-13
XKR4	RP1-90L6.2	0.747655	7.06725e-16
XKR4	SMAD1-AS2	0.647556	4.87452e-11
XKR4	PCDH9-AS2	0.596823	3.26737e-09
XKR4	RP11-638F5.1	0.693474	5.15602e-13
XKR4	RP11-624M8.1	0.755807	2.26545e-16
XKR4	RP11-57H14.2	0.575279	1.57569e-08
XKR4	RP1-122P22.2	0.618761	5.8152e-10
XKR4	CCND2-AS2	0.604543	1.80664e-09
XKR4	RP11-382E9.1	0.677777	2.67628e-12
XKR4	RP11-298A8.2	0.554495	6.48037e-08
XKR4	RP11-250B2.3	0.554818	6.34398e-08
XKR4	ANKRD10-IT1	0.591666	4.81209e-09
XKR4	FGF13-AS1	0.580593	1.08028e-08
XKR4	RP1-283K11.2	0.615224	7.75067e-10
XKR4	LINC00399	0.589636	5.5936e-09
XKR4	STARD4-AS1	0.692172	5.93419e-13
XKR4	RP3-323P13.2	0.7454	9.60843e-16
XKR4	RP11-367F23.2	0.628665	2.55136e-10
XKR4	SLC9A9-AS1	0.567815	2.64786e-08
XKR4	AC144521.1	0.631527	1.99988e-10
XKR4	RP1-293L8.2	0.680379	2.05138e-12
XKR4	NAMA	0.614663	8.10933e-10
XKR4	RP11-628E19.2	0.813966	1.46105e-20
XKR4	RP1-90L6.3	0.694669	4.52857e-13
XKR4	RP11-446J8.1	0.606063	1.60471e-09
XKR4	RP11-480D4.1	0.734399	4.10998e-15
XKR4	PCDH9-AS3	0.639481	1.00282e-10
XKR4	LINC01091	0.563917	3.45483e-08
XKR4	RP1-30E17.2	0.563362	3.58722e-08
XKR4	AC093642.3	0.593343	4.24574e-09
XKR4	SNORD116-20	0.649129	4.22449e-11
XKR4	RP11-138M12.1	0.642867	7.43023e-11
XKR4	RP11-523O18.5	0.570605	2.18425e-08
XKR4	RP11-332H18.5	0.560565	4.33103e-08
XKR4	ZMIZ1-AS1	0.587884	6.36429e-09
XKR4	RP11-725G5.2	0.613891	8.62878e-10
XKR4	RGMB-AS1	0.651659	3.35058e-11
XKR4	CTD-2528A14.1	0.605842	1.63267e-09
XKR4	AC099754.1	0.60261	2.09861e-09
XKR4	RP11-328D5.1	0.575999	1.49778e-08
XKR4	AC114877.3	0.628096	2.67715e-10
XKR4	RP5-1024N4.4	0.552103	7.57893e-08
XKR4	RP11-1078H9.1	0.575889	1.50939e-08
XKR4	RP11-563N6.6	0.561936	3.94974e-08
XKR4	WI2-85898F10.1	0.682569	1.63648e-12
XKR4	AC108462.1	0.580883	1.05803e-08
SLITRK5	RP11-735G4.1	0.619852	5.31795e-10
SLITRK5	RP11-480D4.2	0.648285	4.56233e-11
SLITRK5	RP11-266O8.1	0.635953	1.36541e-10
SLITRK5	CTD-2313P7.1	0.627992	2.70079e-10
SLITRK5	RP11-624M8.1	0.674092	3.88293e-12
SLITRK5	RP11-569G13.2	0.56025	4.42334e-08
SLITRK5	FGF13-AS1	0.563357	3.58828e-08
SLITRK5	RP1-293L8.2	0.658786	1.72307e-11
SLITRK5	RP11-480D4.1	0.598272	2.92691e-09
SLITRK5	PCDH9-AS3	0.577783	1.32008e-08
SLITRK5	CTC-340A15.2	0.600393	2.48913e-09
SLITRK5	AC107072.2	0.552433	7.41753e-08
SLITRK5	RP11-138M12.1	0.56292	3.69589e-08
SLITRK5	RGMB-AS1	0.628241	2.6444e-10
SLITRK5	CTD-2528A14.1	0.574789	1.63096e-08
SLITRK5	RP5-1024N4.4	0.633309	1.71629e-10
SLITRK5	RP11-1078H9.1	0.667639	7.35579e-12
SLITRK5	RP11-80H8.3	0.557265	5.39724e-08
SLITRK5	RP11-676J15.1	0.576499	1.44573e-08
SLITRK5	LINC00930	0.583246	8.92448e-09
PCNX	CELF2-AS1	0.574295	1.68861e-08
PCNX	RP11-206L10.2	0.58505	7.82984e-09
PIEZO2	RP11-13K12.5	0.644444	6.4529e-11
PIEZO2	LINC01088	0.793812	5.85979e-19
PIEZO2	AC099754.1	0.571911	1.9947e-08
PIEZO2	AP001422.3	0.587466	6.56271e-09
NXN	RP11-305F18.1	0.579255	1.1887e-08
NXN	RP13-507P19.2	0.561638	4.02968e-08
NXN	LINC00882	0.60447	1.81697e-09
NXN	RP11-446J8.1	0.588549	6.06064e-09
NXN	LA16c-444G7.2	0.602209	2.16466e-09
NXN	CRYM-AS1	0.612057	9.99423e-10
NXN	AGAP1-IT1	0.582046	9.73132e-09
NXN	SMARCA5-AS1	0.552207	7.52796e-08
NXN	RP11-676J12.8	0.902058	6.31429e-31
S1PR3	AC007319.1	0.585488	7.58394e-09
S1PR3	RP11-462G22.1	0.568052	2.60514e-08
S1PR3	RP11-17J14.2	0.578001	1.29972e-08
S1PR3	RP11-35O15.1	0.709271	8.81244e-14
S1PR3	RP11-166A12.1	0.564266	3.37406e-08
S1PR3	RP11-713M15.1	0.577719	1.32603e-08
S1PR3	RP5-1077I2.3	0.572134	1.96403e-08
ZNF91	RP11-292F22.5	0.568316	2.55822e-08
ZNF91	RP11-545D19.1	0.564785	3.25711e-08
ZNF91	CTD-2023M8.1	0.565543	3.0933e-08
ZNF91	STARD4-AS1	0.598266	2.9282e-09
ZNF91	RP11-23E10.3	0.684915	1.28186e-12
ZNF91	RP11-15H20.6	0.604555	1.805e-09
LCA5	RP11-206L10.3	0.608966	1.27743e-09
LDB2	RP1-90L6.2	0.605835	1.63351e-09
LDB2	RP11-446J8.1	0.630619	2.161e-10
FBXO15	AC003090.1	0.555998	5.86934e-08
TSPAN9	RP11-141M1.1	0.590959	5.07151e-09
TSPAN9	RP11-100K18.1	0.556803	5.56504e-08
TSPAN9	RP5-1063M23.1	0.636567	1.29437e-10
TSPAN9	RP11-417E7.2	0.568754	2.48225e-08
TSPAN9	RP11-158M2.2	0.55933	4.70406e-08
SDK1	RP11-305F18.1	0.724373	1.45379e-14
SDK1	RP4-742J24.2	0.554054	6.67082e-08
SDK1	RP11-735G4.1	0.659682	1.58302e-11
SDK1	LINC00511	0.574925	1.61543e-08
SDK1	RP1-90L6.2	0.579208	1.19269e-08
SDK1	RP11-359D14.2	0.703172	1.76702e-13
SDK1	SMAD1-AS2	0.594241	3.96957e-09
SDK1	PCDH9-AS2	0.68316	1.53911e-12
SDK1	RP11-367F23.2	0.573724	1.75754e-08
SDK1	SLC9A9-AS1	0.627808	2.74296e-10
SDK1	RP11-446J8.1	0.678498	2.4868e-12
SDK1	AC011284.3	0.618208	6.08358e-10
SDK1	PCDH9-AS3	0.580958	1.05234e-08
SDK1	RP11-211N8.2	0.690468	7.12475e-13
SDK1	AC107072.2	0.612668	9.51744e-10
SDK1	RP1-30E17.2	0.58695	6.81569e-09
SDK1	RP11-138M12.1	0.585133	7.78232e-09
SDK1	CRYM-AS1	0.629494	2.3782e-10
SDK1	RP11-332H18.5	0.559667	4.59945e-08
SDK1	RP11-725G5.2	0.576168	1.47994e-08
SDK1	RGMB-AS1	0.617783	6.29787e-10
SDK1	CTD-2528A14.1	0.610534	1.1282e-09
SDK1	AC114877.3	0.710912	7.2859e-14
SDK1	SATB2-AS1	0.571308	2.08025e-08
SDK1	RP11-563N6.6	0.556829	5.5553e-08
SDK1	AC108462.1	0.560329	4.39992e-08
MUC8	CTD-2516F10.2	0.553199	7.05539e-08
NEBL	SENCR	0.597443	3.11732e-09
NEBL	LINC00511	0.623342	3.98663e-10
NEBL	RP11-638F5.1	0.630076	2.26337e-10
NEBL	RP11-378A12.1	0.583186	8.96335e-09
NEBL	RP3-323P13.2	0.552935	7.17815e-08
NEBL	NAMA	0.551897	7.68134e-08
NEBL	ZEB2-AS1	0.564765	3.26158e-08
NEBL	RP11-575A19.2	0.596392	3.37564e-09
NEBL	RP11-523O18.5	0.551995	7.63252e-08
NEBL	RP11-35O15.1	0.556177	5.8003e-08
NEBL	RP11-328D5.1	0.63724	1.22061e-10
NEBL	JARID2-AS1	0.596551	3.33526e-09
ERG	AC131097.3	0.646043	5.58909e-11
CXXC5	CTD-3224K15.2	0.656103	2.21801e-11
ZMAT3	RP11-385J1.2	0.626699	3.01153e-10
STX8	RP11-231E4.2	0.571405	2.0663e-08
WDFY4	AC007319.1	0.628418	2.6051e-10
WDFY4	SENCR	0.619725	5.37375e-10
WDFY4	RP11-204M4.2	0.578764	1.2311e-08
WDFY4	RP11-305F18.1	0.712096	6.34662e-14
WDFY4	RP11-16L9.4	0.550975	8.15673e-08
WDFY4	CTD-2187J20.1	0.684658	1.31672e-12
WDFY4	CTC-523E23.4	0.580655	1.07546e-08
WDFY4	RP11-735G4.1	0.689566	7.84461e-13
WDFY4	RP11-480D4.2	0.608743	1.30006e-09
WDFY4	RP11-264E18.1	0.585457	7.60095e-09
WDFY4	LINC00511	0.655165	2.42103e-11
WDFY4	RP1-90L6.2	0.684308	1.36573e-12
WDFY4	RP11-545D19.1	0.680743	1.97603e-12
WDFY4	RP11-359D14.2	0.715391	4.30575e-14
WDFY4	AC113607.3	0.577496	1.34724e-08
WDFY4	SMAD1-AS2	0.634837	1.50417e-10
WDFY4	PCDH9-AS2	0.746936	7.79779e-16
WDFY4	RP11-462G22.1	0.608268	1.34969e-09
WDFY4	SPANXA2-OT1	0.560005	4.49649e-08
WDFY4	RP11-624M8.1	0.658683	1.74004e-11
WDFY4	RP11-378A12.1	0.60787	1.3927e-09
WDFY4	AC131097.3	0.577459	1.3507e-08
WDFY4	RP1-122P22.2	0.73089	6.43669e-15
WDFY4	CCND2-AS2	0.5774	1.35639e-08
WDFY4	RP11-382E9.1	0.564201	3.38879e-08
WDFY4	RP11-186F10.2	0.605581	1.66629e-09
WDFY4	PCDH9-AS4	0.713957	5.10132e-14
WDFY4	RP1-283K11.2	0.584778	7.98591e-09
WDFY4	LINC00399	0.625628	3.29484e-10
WDFY4	RP3-323P13.2	0.625638	3.29182e-10
WDFY4	RP11-367F23.2	0.600878	2.39823e-09
WDFY4	SLC9A9-AS1	0.681772	1.77714e-12
WDFY4	RP1-293L8.2	0.598918	2.78625e-09
WDFY4	NAMA	0.579262	1.18814e-08
WDFY4	LINC00487	0.561879	3.96492e-08
WDFY4	RP1-90L6.3	0.631417	2.01873e-10
WDFY4	RP11-62C7.2	0.677432	2.77197e-12
WDFY4	ZEB2-AS1	0.551112	8.0843e-08
WDFY4	RP11-446J8.1	0.72906	8.11054e-15
WDFY4	RP11-480D4.1	0.625325	3.3793e-10
WDFY4	AC011284.3	0.622547	4.2587e-10
WDFY4	PCDH9-AS3	0.764463	6.43921e-17
WDFY4	RP11-475I24.3	0.551843	7.70835e-08
WDFY4	RP11-527H14.6	0.619709	5.38088e-10
WDFY4	LINC01115	0.555478	6.0741e-08
WDFY4	RP11-369K17.1	0.556319	5.74594e-08
WDFY4	RP11-677M14.3	0.694009	4.86517e-13
WDFY4	RP11-211N8.2	0.686276	1.11136e-12
WDFY4	AC107072.2	0.655219	2.40895e-11
WDFY4	AC093642.3	0.728894	8.28141e-15
WDFY4	RP11-138M12.1	0.631471	2.00946e-10
WDFY4	RP11-523O18.5	0.699587	2.63815e-13
WDFY4	RP11-332H18.5	0.65707	2.02571e-11
WDFY4	ISM1-AS1	0.649553	4.06424e-11
WDFY4	RP11-35O15.1	0.669138	6.34993e-12
WDFY4	RGMB-AS1	0.730646	6.63841e-15
WDFY4	CTD-2528A14.1	0.675153	3.49015e-12
WDFY4	RP11-166A12.1	0.709429	8.65286e-14
WDFY4	RP11-328D5.1	0.617253	6.57584e-10
WDFY4	RP11-713M15.1	0.570896	2.14054e-08
WDFY4	AC114877.3	0.677438	2.77014e-12
WDFY4	RP5-1077I2.3	0.632775	1.79692e-10
WDFY4	RP11-43N5.1	0.570581	2.18782e-08
WDFY4	RP11-80H8.3	0.635373	1.43597e-10
WDFY4	RP11-486O13.2	0.687314	9.96153e-13
WDFY4	RP11-15H20.6	0.643536	6.99925e-11
WDFY4	RP11-563N6.6	0.81666	8.62302e-21
WDFY4	RP11-1157N2-B.2	0.629762	2.32453e-10
WDFY4	AC108462.1	0.613616	8.82149e-10
JPH3	CTC-523E23.4	0.572488	1.9161e-08
JPH3	RP11-638F5.1	0.586654	6.96492e-09
[truncated: 492 more rows]

## Sheet: Table_2C
	The output contains result using KEGG as reference database in GeneSCF tool for highly correlated cis PC genes from DE lncRNAs in DUX4 subtype
Cis PC genes correlated with DUX4 DE lncRNAs (Gene Symbols)	Pathways	Number of cis PC genes correlated with DUX4 DE lncRNAs	P-value
KLRK1; IFNG; ITGAL; ITGB2; TGFB2; THBS2;	hsa05144: Malaria	6	1.04e-05
ITGA6; ITGAL; ITGB2; CD99; PVRL1; SELPLG; ESAM; CD22; CD34;	hsa04514: Cell adhesion molecules (CAMs)	9	1.27e-05
AGAP1; EPN2; EHD2; IGF1R; MDM2; SH3GLB1; TGFB2; PSD2; PARD6G;	hsa04144: Endocytosis	9	0.000145238
AKT3; IGF1R; FAS; ITGA6; MDM2; LEF1; RALA; RARA; TCF7L2; TGFB2; FZD6;	hsa05200: Pathways in cancer	11	0.000283076
AKT3; IGF1R; IGF2; FAS; MDM2; TGFB2; TIAM1; EZR; FZD6;	hsa05205: Proteoglycans in cancer	9	0.000311972
IGF1R; LEF1; PVRL1; TCF7L2; ACTN1;	hsa04520: Adherens junction	5	0.000721278
ITGB2; SMAD1; LEF1; TCF7L2; TGFB2; FZD6; PARD6G;	hsa04390: Hippo signaling pathway	7	0.000739537
ITGAL; ITGB2; CD99; EZR; ACTN1; ESAM;	hsa04670: Leukocyte transendothelial migration	6	0.000952882
ERG; H3F3A; IGF1R; SMAD1; MDM2; RARA; WT1;	hsa05202: Transcriptional misregulation in cancer	7	0.00163923
AKT3; IGF1R; MDM2; LEF1; TCF7L2;	hsa05215: Prostate cancer	5	0.00166829
TCIRG1; IFNG; ITGAL; ITGB2; TGFB2;	hsa05323: Rheumatoid arthritis	5	0.00209591
AKT3; LEF1; RARA; TCF7L2;	hsa05221: Acute myeloid leukemia	4	0.00228524
KLRK1; IFNG; FAS; ITGAL; ITGB2; KLRD1;	hsa04650: Natural killer cell mediated cytotoxicity	6	0.00242977
AKT3; LEF1; TCF7L2; TGFB2;	hsa05210: Colorectal cancer	4	0.00304692
AKT3; GNA15; IFNG; FAS; TGFB2;	hsa05142: Chagas disease (American trypanosomiasis)	5	0.00331041
PRKAG1; RORB; BHLHE40;	hsa04710: Circadian rhythm	3	0.00356611
GNA15; IFNG; ITGB2; TGFB2; ACTN1;	hsa05146: Amoebiasis	5	0.00385687
SESN3; DDB2; FAS; MDM2;	hsa04115: p53 signaling pathway	4	0.00416974
ITGA6; ITGAL; ITGB2; ARHGEF4; TIAM1; EZR; ACTN1;	hsa04810: Regulation of actin cytoskeleton	7	0.00425548
ITGA6; LEF1; TCF7L2; ACTN1;	hsa05412: Arrhythmogenic right ventricular cardiomyopathy (ARVC)	4	0.00579797
IFNG; SMAD1; TGFB2; ACVR2B;	hsa04350: TGF-beta signaling pathway	4	0.00749208
AKT3; TCIRG1; CORO1A; IFNG; ITGB2; TGFB2;	hsa05152: Tuberculosis	6	0.00768466
IFNG; FAS; KLRD1;	hsa05332: Graft-versus-host disease	3	0.00939426
IL9R; ITGA6; CD22; CD34;	hsa04640: Hematopoietic cell lineage	4	0.00984558
AKT3; FLOT2; IRS1; PHKA2; PRKAG1;	hsa04910: Insulin signaling pathway	5	0.0104569
AKT3; IGF1R; ITGA6; THBS2; ZYX; ACTN1;	hsa04510: Focal adhesion	6	0.0130288
AKT3; LEF1; TCF7L2;	hsa05213: Endometrial cancer	3	0.0136067
LEF1; TCF7L2; FZD6;	hsa05217: Basal cell carcinoma	3	0.0156906
PDSS1; ACAT1;	hsa00900: Terpenoid backbone biosynthesis	2	0.0182187
ITGAL; ITGB2; SELPLG;	hsa05150: Staphylococcus aureus infection	3	0.0187333
AKT3; IGF1R; MDM2;	hsa05214: Glioma	3	0.023867
AKT3; RALA; TGFB2;	hsa05212: Pancreatic cancer	3	0.0247892
AKT3; IFNG; ITGA6; TGFB2;	hsa05145: Toxoplasmosis	4	0.0278585
ETFB; CA13;	hsa00910: Nitrogen metabolism	2	0.0282189
AKT3; IRS1; PRKAG1;	hsa04920: Adipocytokine signaling pathway	3	0.0296849
AKT3; IGF1R; MDM2;	hsa05218: Melanoma	3	0.0296849
NT5E; NAPRT1;	hsa00760: Nicotinate and nicotinamide metabolism	2	0.030057
AKT3; MDM2; TGFB2;	hsa05220: Chronic myeloid leukemia	3	0.0317755
LEF1; TCF7L2;	hsa05216: Thyroid cancer	2	0.0319414
ITGAL; ITGB2; MYH3;	hsa05416: Viral myocarditis	3	0.032849
AKT3; IFITM1; CD22;	hsa04662: B cell receptor signaling pathway	3	0.0350521
IFNG; ITGB2; TGFB2;	hsa05140: Leishmaniasis	3	0.0350521
AKT3; MYH3; PARD6G; ACTN1;	hsa04530: Tight junction	4	0.0370645
AKT3; ITGAL; ITGB2; ANAPC7; TGFB2; FZD6;	hsa05166: HTLV-I infection	6	0.0391995
IFNG; FAS;	hsa05143: African trypanosomiasis	2	0.042024
AKT3; IGF1R; ITGA6; IRS1; MDM2; PPP2R5C; THBS2;	hsa04151: PI3K-Akt signaling pathway	7	0.0430914
BET1; STX16;	hsa04130: SNARE interactions in vesicular transport	2	0.0463476
AKT3; IGF1R; ANAPC7;	hsa04914: Progesterone-mediated oocyte maturation	3	0.0471745
ITGA6; PRKAG1; TGFB2;	hsa05410: Hypertrophic cardiomyopathy (HCM)	3	0.0484864
AKT3; DDB2; FAS; TGFB2;	hsa05161: Hepatitis B	4	0.0497663

## Sheet: Table S2_D
The output contains result using KEGG as reference database in GeneSCF tool for highly correlated trans (genomic size >100 kb) PC genes from DE lncRNAs in DUX4 subtype
Trans PC genes correlated with DUX4 DE lncRNAs	Process	Number of trans PC genes correlated with DUX4 DE lncRNAs	P-value
CREB1; FCGR1A; IFNG; PPP3CC; SYK; MAP3K7;	hsa04380: Osteoclast differentiation	6	0.000286329
ERG; EYA1; FCGR1A; FUT8; IGF1R; NR4A3;	hsa05202: Transcriptional misregulation in cancer	6	0.00122634
CREB1; FCGR1A; IFNG; PIK3C3; PPP3CC; SYK;	hsa05152: Tuberculosis	6	0.00133083
FCGR1A; IFNG; ITGA4; MAP3K7;	hsa05140: Leishmaniasis	4	0.0016875
CREB1; FGF13; IGF1R; ITGA4; LAMA3; SYK; THBS4; TCL1A;	hsa04151: PI3K-Akt signaling pathway	8	0.00199131
FUT8; CHST2;	hsa00533: Glycosaminoglycan biosynthesis - keratan sulfate	2	0.00508669
LAT; IFNG; PPP3CC; MAP3K7;	hsa04660: T cell receptor signaling pathway	4	0.00566853
EPHA7; PPP3CC; SLIT2; NTN1;	hsa04360: Axon guidance	4	0.010802
CREB1; ITPR1; TPO;	hsa04918: Thyroid hormone synthesis	3	0.0120578
IGF1R; PTPRM; MAP3K7;	hsa04520: Adherens junction	3	0.012496
LAT; IFNG; PPP3CC; SYK;	hsa04650: Natural killer cell mediated cytotoxicity	4	0.014383
CREB1; BHLHE40;	hsa04710: Circadian rhythm	2	0.0184841
ITGA4; LAMA3; THBS4;	hsa04512: ECM-receptor interaction	3	0.0195882
FCGR1A; ITGA4; TPO;	hsa04640: Hematopoietic cell lineage	3	0.0201639
IFNG; PIK3C3;	hsa04140: Regulation of autophagy	2	0.0217843
FCGR1A; LAT; SYK;	hsa04666: Fc gamma R-mediated phagocytosis	3	0.0219464
LAT; SYK; MAP3K7;	hsa04064: NF-kappa B signaling pathway	3	0.0225592
HLCS;	hsa00780: Biotin metabolism	1	0.0250677
IGF1R; ITPR1; PPP3CC;	hsa04114: Oocyte meiosis	3	0.0367508
CREB1; ITPR1; KCNQ5;	hsa04725: Cholinergic synapse	3	0.0375563
IFNG; THBS4;	hsa05144: Malaria	2	0.0414608
IGF1R; ITGA4; LAMA3; THBS4;	hsa04510: Focal adhesion	4	0.0448459
IFNG; LAMA3; MAP3K7;	hsa05145: Toxoplasmosis	3	0.0452085

## Sheet: Table S2_E
Output from lncRNAs based enrichment analysis based on correlated cis PC genes				Output from DE PC based enrichment analysis
Cis PC genes correlated with DUX4 DE lncRNAs	KEGG pathways	Number of cis PC genes correlated with DUX4 DE lncRNAs	P-value	Genes in PC based analysis	Number of genes involved in pathways	P-value
KLRK1; IFNG; ITGAL; ITGB2; TGFB2; THBS2;	hsa05144: Malaria	6	1.04e-05	COMP; CR1; ICAM1; IL10; IL12A; ITGAL; ITGB2; SDC1; SDC2; TGFB2; THBS2; THBS4; TNF;	13	0.000424649
ITGA6; ITGAL; ITGB2; CD99; PVRL1; SELPLG; ESAM; CD22; CD34;	hsa04514: Cell adhesion molecules (CAMs)	9	1.27e-05	CDH2; CDH3; CDH4; CDH5; NTNG1; HLA-DMA; HLA-DMB; HLA-DPB1; HLA-DRA; HLA-DRB1; ICAM1; ICAM3; ITGA6; ITGAL; ITGAV; ITGB2; ITGB7; CD99; CLDN11; NLGN2; PTPRF; PTPRM; PVRL1; PVRL2; SDC1; SDC2; CNTN2; ITGA8; MPZL1; CLDN2; ESAM; CD6; CD22; LRRC4B; CD34;	35	8.46e-08
AGAP1; EPN2; EHD2; IGF1R; MDM2; SH3GLB1; TGFB2; PSD2; PARD6G;	hsa04144: Endocytosis	9	0.000145238	RNF41; EHD1; ACAP3; ARAP2; AGAP1; CLTC; CSF1R; IQSEC2; FLT1; NEDD4L; PSD3; PSD4; LDLRAP1; GRK5; GRK6; SH3KBP1; EHD4; EHD2; IGF1R; KIT; SMAD3; SMAD7; MDM2; NTRK1; PDGFRA; PLD1; PML; PRKCZ; PARD3; RET; SMAP2; TFRC; TGFB2; CLTCL1; PSD2; RAB11FIP4; PARD6G; IQSEC1;	38	4.93e-06
AKT3; IGF1R; FAS; ITGA6; MDM2; LEF1; RALA; RARA; TCF7L2; TGFB2; FZD6;	hsa05200: Pathways in cancer	11	0.000283076	AKT3; CDK6; EGLN3; CSF1R; E2F3; ETS1; FGF13; FOXO1; FLT3; FN1; PIK3R5; GLI3; GSK3B; XIAP; IGF1R; FAS; ITGA6; AR; ITGA2; ITGAV; KIT; LAMA3; LAMA5; LAMB1; SMAD3; MDM2; MITF; NFKBIA; NTRK1; LEF1; WNT16; PDGFRA; PIK3CD; PIK3R1; PLD1; PML; PRKCA; MAPK10; RALA; RARA; RET; HHIP; SMO; SPI1; STAT3; TCF7; TCF7L2; TGFB2; WNT5A; WNT8B; BIRC7; FZD6; CASP8; IKBKG; FGF18; FGF16; CCNA1; CCNE2; FGF19;	59	4.38e-08
AKT3; IGF1R; IGF2; FAS; MDM2; TGFB2; TIAM1; EZR; FZD6;	hsa05205: Proteoglycans in cancer	9	0.000311972	AKT3; HPSE; DCN; FGF13; FLNC; FN1; PIK3R5; ANK2; DROSHA; IGF1R; IGF2; FAS; ITGA2; ITGAV; MDM2; PAK1; WNT16; PIK3CD; PIK3R1; PPP1CC; PRKCA; PTPN6; SDC1; SDC2; SMO; STAT3; TGFB2; TIAM1; TIMP3; ACTG1; TNF; VAV2; WNT5A; WNT8B; CAMK2B; FZD6; FGF18; FGF16; FGF19;	39	1.94e-05
IGF1R; LEF1; PVRL1; TCF7L2; ACTN1;	hsa04520: Adherens junction	5	0.000721278	WASF2; SORBS1; IGF1R; SMAD3; LEF1; PARD3; PTPN6; PTPRF; PTPRM; PVRL1; PVRL2; TCF7; TCF7L2; TJP1; ACTG1; ACTN1;	16	0.00061169
ITGB2; SMAD1; LEF1; TCF7L2; TGFB2; FZD6; PARD6G;	hsa04390: Hippo signaling pathway	7	0.000739537	INADL; CTGF; AMOT; DLG3; GSK3B; ID4; ITGB2; SMAD1; SMAD3; SMAD7; LEF1; WNT16; PPP1CC; PPP2R2B; PRKCZ; PARD3; BMPR2; TCF7; TCF7L2; TGFB2; ACTG1; WNT5A; WNT8B; FZD6; PARD6G; AJUBA; CCND3; MOB1B;	28	0.000153404
ITGAL; ITGB2; CD99; EZR; ACTN1; ESAM;	hsa04670: Leukocyte transendothelial migration	6	0.000952882	CDH5; MYL12B; MYL9; MYL12A; PTK2B; PIK3R5; ICAM1; ITGAL; ITGB2; ITK; CD99; NCF2; NCF4; CLDN11; PIK3CD; PIK3R1; PRKCA; CXCL12; ACTG1; VAV2; ACTN1; CLDN2; ESAM; BCAR1;	24	8.53e-05
ERG; H3F3A; IGF1R; SMAD1; MDM2; RARA; WT1;	hsa05202: Transcriptional misregulation in cancer	7	0.00163923	CDK9; CEBPE; CSF1R; PTCRA; DUSP6; EYA1; FOXO1; FLI1; FLT1; FLT3; FUT8; H3F3A; IGF1R; IGFBP3; ITGB7; SMAD1; MDM2; MPO; ATM; NTRK1; PAX5; WNT16; PML; BMP2K; RARA; REL; BCL6; SPI1; TSPAN7; WT1; NR4A3; SLC45A3; PROM1; CCNA1;	34	1.28e-05
AKT3; IGF1R; MDM2; LEF1; TCF7L2;	hsa05215: Prostate cancer	5	0.00166829	AKT3; E2F3; FOXO1; PIK3R5; GSK3B; IGF1R; AR; MDM2; NFKBIA; LEF1; PDGFRA; PIK3CD; PIK3R1; PDGFC; TCF7; TCF7L2; PDGFD; IKBKG; CCNE2;	19	0.000264116
TCIRG1; IFNG; ITGAL; ITGB2; TGFB2;	hsa05323: Rheumatoid arthritis	5	0.00209591	TCIRG1; FLT1; ANGPT1; HLA-DMA; HLA-DMB; HLA-DPB1; HLA-DRA; HLA-DRB1; ICAM1; IL15; ITGAL; ITGB2; ATP6V0A4; CCL5; CXCL12; TGFB2; TNF; TNFSF13; TNFRSF11A;	19	0.000477662
AKT3; LEF1; RARA; TCF7L2;	hsa05221: Acute myeloid leukemia	4	0.00228524	AKT3; PIM2; FLT3; PIK3R5; KIT; LEF1; PIK3CD; PIK3R1; PML; RARA; SPI1; STAT3; TCF7; TCF7L2; IKBKG; CCNA1;	16	5.49e-05
KLRK1; IFNG; FAS; ITGAL; ITGB2; KLRD1;	hsa04650: Natural killer cell mediated cytotoxicity	6	0.00242977	MICA; PTK2B; PIK3R5; LAT; ICAM1; RAET1G; FAS; ITGAL; ITGB2; KIR2DL1; KIR2DL3; KIR2DL4; KIR3DL1; KIR3DL2; LCK; LCP2; NFATC2; NFATC4; PAK1; PIK3CD; PIK3R1; PRKCA; PTPN6; SH3BP2; TNF; VAV2; ULBP3; ULBP1; TNFSF10; TNFRSF10A; CD247; CD48;	32	1.09e-06
AKT3; LEF1; TCF7L2; TGFB2;	hsa05210: Colorectal cancer	4	0.00304692	AKT3; PIK3R5; GSK3B; SMAD3; LEF1; PIK3CD; PIK3R1; MAPK10; TCF7; TCF7L2; TGFB2;	11	0.0156491
AKT3; GNA15; IFNG; FAS; TGFB2;	hsa05142: Chagas disease (American trypanosomiasis)	5	0.00331041	AKT3; TLR6; ADCY1; PIK3R5; GNA11; GNA15; GNAO1; FAS; IL10; IL12A; SMAD3; NFKBIA; PIK3CD; PIK3R1; PPP2R2B; MAPK10; CCL5; TGFB2; TNF; CASP8; IKBKG; CD3D; CD3E; CD247;	24	1.7e-05
GNA15; IFNG; ITGB2; TGFB2; ACTN1;	hsa05146: Amoebiasis	5	0.00385687	ADCY1; SERPINB1; FN1; PIK3R5; COL24A1; GNA11; GNA15; IL10; IL12A; ITGB2; LAMA3; LAMA5; LAMB1; SERPINB6; SERPINB9; PIK3CD; PIK3R1; PRKCA; TGFB2; TNF; ACTN1;	21	0.000433234
SESN3; DDB2; FAS; MDM2;	hsa04115: p53 signaling pathway	4	0.00416974	CDK6; SESN3; GADD45A; APAF1; IGFBP3; FAS; MDM2; ATM; CASP8; CCND3; CCNE2;	11	0.0268347
ITGA6; ITGAL; ITGB2; ARHGEF4; TIAM1; EZR; ACTN1;	hsa04810: Regulation of actin cytoskeleton	7	0.00425548	ARPC1B; WASF2; MYL12B; MYL9; MYL12A; CHRM3; DIAPH2; FGF13; FN1; PIK3R5; GSN; ITGA6; ITGA2; ITGAL; ITGAV; ITGB2; ITGB7; LIMK2; PAK1; ARHGEF4; PDGFRA; PIK3CD; PIK3R1; SSH3; PPP1CC; PDGFC; TIAM1; ACTG1; VAV2; MYH14; PDGFD; ARPC5L; ITGA8; SSH2; ACTN1; FGF18; FGF16; BCAR1; FGF19;	39	7.12e-06
ITGA6; LEF1; TCF7L2; ACTN1;	hsa05412: Arrhythmogenic right ventricular cardiomyopathy (ARVC)	4	0.00579797	CDH2; DMD; DSP; ITGA6; ITGA2; ITGAV; ITGB7; LEF1; SGCD; SGCG; TCF7; TCF7L2; ACTG1; CACNA1C; CACNA2D1; ITGA8; ACTN1; CACNA2D2; CACNA2D4;	19	3.82e-05
IFNG; SMAD1; TGFB2; ACVR2B;	hsa04350: TGF-beta signaling pathway	4	0.00749208	FST; DCN; E2F5; BAMBI; ID4; SMAD1; SMAD3; SMAD7; BMPR2; TGFB2; LEFTY2; TNF; CHRD; ACVR1; ACVR2B;	15	0.00375204
AKT3; TCIRG1; CORO1A; IFNG; ITGB2; TGFB2;	hsa05152: Tuberculosis	6	0.00768466	AKT3; TCIRG1; CLEC4M; TLR6; CORO1A; CR1; FCGR2B; HLA-DMA; HLA-DMB; HLA-DPB1; HLA-DRA; HLA-DRB1; APAF1; IL10; IL10RA; IL12A; IRAK2; ITGB2; LAMP2; MRC1; NFYA; ATP6V0A4; MAPK10; TGFB2; TNF; CAMK2B; CASP8; RIPK2;	28	0.00142159
IFNG; FAS; KLRD1;	hsa05332: Graft-versus-host disease	3	0.00939426	HLA-DMA; HLA-DMB; HLA-DPB1; HLA-DRA; HLA-DRB1; FAS; KIR2DL1; KIR2DL3; KIR3DL1; KIR3DL2; TNF;	11	0.00201531
IL9R; ITGA6; CD22; CD34;	hsa04640: Hematopoietic cell lineage	4	0.00984558	CR1; CR2; CSF1R; FLT3; HLA-DRA; HLA-DRB1; IL3RA; IL6R; IL9R; ITGA6; ITGA2; KIT; TFRC; TNF; TPO; CD1E; CD3D; CD3E; CD5; CD9; MS4A1; CD22; CD34; CD38;	24	1.31e-06
AKT3; FLOT2; IRS1; PHKA2; PRKAG1;	hsa04910: Insulin signaling pathway	5	0.0104569	AKT3; SORBS1; PPARGC1A; FOXO1; FLOT2; PIK3R5; MKNK2; GSK3B; GYS2; IRS1; PDE3B; PIK3CD; PIK3R1; PPP1CC; PRKAR1A; PRKCZ; MAPK10; PTPRF; PYGL; PYGM; TRIP10;	21	0.00638434
AKT3; IGF1R; ITGA6; THBS2; ZYX; ACTN1;	hsa04510: Focal adhesion	6	0.0130288	AKT3; MYL12B; MYL9; MYL12A; COMP; FLNC; FLT1; FN1; PIK3R5; COL24A1; GSK3B; PARVB; XIAP; IGF1R; ITGA6; ITGA2; ITGAV; ITGB7; LAMA3; LAMA5; LAMB1; PAK1; PDGFRA; PIK3CD; PIK3R1; PPP1CC; PRKCA; MAPK10; PDGFC; SPP1; THBS2; THBS4; ACTG1; VAV2; ZYX; PDGFD; TLN2; ITGA8; ACTN1; CCND3; BCAR1;	41	5.46e-07
LEF1; TCF7L2; FZD6;	hsa05217: Basal cell carcinoma	3	0.0156906	GLI3; GSK3B; LEF1; WNT16; HHIP; SMO; TCF7; TCF7L2; WNT5A; WNT8B; FZD6;	11	0.00748921
ITGAL; ITGB2; SELPLG;	hsa05150: Staphylococcus aureus infection	3	0.0187333	MASP2; FCGR2B; HLA-DMA; HLA-DMB; HLA-DPB1; HLA-DRA; HLA-DRB1; ICAM1; IL10; ITGAL; ITGB2; PLG;	12	0.0047631
AKT3; IGF1R; MDM2;	hsa05214: Glioma	3	0.023867	AKT3; CDK6; E2F3; PIK3R5; IGF1R; MDM2; PDGFRA; PIK3CD; PIK3R1; PRKCA; CAMK2B;	11	0.0206902
AKT3; RALA; TGFB2;	hsa05212: Pancreatic cancer	3	0.0247892	AKT3; CDK6; E2F3; PIK3R5; SMAD3; PIK3CD; PIK3R1; PLD1; MAPK10; RALA; STAT3; TGFB2; IKBKG;	13	0.00428412
AKT3; IFNG; ITGA6; TGFB2;	hsa05145: Toxoplasmosis	4	0.0278585	AKT3; PIK3R5; LY96; ALOX5; GNAO1; HLA-DMA; HLA-DMB; HLA-DPB1; HLA-DRA; HLA-DRB1; XIAP; IRGM; IL10; IL10RA; IL12A; ITGA6; LAMA3; LAMA5; LAMB1; NFKBIA; PIK3CD; PIK3R1; MAPK10; STAT3; TGFB2; TNF; BIRC7; CASP8; IKBKG;	29	1.21e-06
AKT3; IRS1; PRKAG1;	hsa04920: Adipocytokine signaling pathway	3	0.0296849	AKT3; PPARGC1A; CPT1C; CPT1B; ACSL4; IRS1; NFKBIA; NFKBIE; MAPK10; STAT3; TNF; TNFRSF1B; IKBKG;	13	0.00726669
AKT3; IGF1R; MDM2;	hsa05218: Melanoma	3	0.0296849	AKT3; CDK6; E2F3; FGF13; PIK3R5; IGF1R; MDM2; MITF; PDGFRA; PIK3CD; PIK3R1; PDGFC; PDGFD; FGF18; FGF16; FGF19;	16	0.000470863
AKT3; MDM2; TGFB2;	hsa05220: Chronic myeloid leukemia	3	0.0317755	AKT3; CDK6; E2F3; PIK3R5; SMAD3; MDM2; NFKBIA; PIK3CD; PIK3R1; TGFB2; IKBKG;	11	0.0398317
ITGAL; ITGB2; MYH3;	hsa05416: Viral myocarditis	3	0.032849	DMD; HLA-DMA; HLA-DMB; HLA-DPB1; HLA-DRA; HLA-DRB1; ICAM1; ITGAL; ITGB2; SGCD; SGCG; ACTG1; MYH14; CASP8;	14	0.00424808
AKT3; IFITM1; CD22;	hsa04662: B cell receptor signaling pathway	3	0.0350521	AKT3; CR2; FCGR2B; PIK3R5; DAPP1; GSK3B; INPP5D; NFATC2; NFATC4; NFKBIA; NFKBIE; PIK3CD; PIK3R1; PTPN6; VAV2; IKBKG; IFITM1; CD22;	18	0.000125962
IFNG; ITGB2; TGFB2;	hsa05140: Leishmaniasis	3	0.0350521	CR1; HLA-DMA; HLA-DMB; HLA-DPB1; HLA-DRA; HLA-DRB1; IL10; IL12A; ITGB2; NCF2; NCF4; NFKBIA; PTPN6; TGFB2; TNF;	15	0.00220822
AKT3; MYH3; PARD6G; ACTN1;	hsa04530: Tight junction	4	0.0370645	AKT3; INADL; MYL12B; MYL9; MYL12A; AMOTL1; EPB41L2; CLDN11; PPP2R2B; PRKCA; PRKCE; PRKCH; PRKCZ; PARD3; CGN; TJP1; ACTG1; MYH14; PARD6G; CASK; ACTN1; CLDN2; TJP2;	23	0.000973205
AKT3; ITGAL; ITGB2; ANAPC7; TGFB2; FZD6;	hsa05166: HTLV-I infection	6	0.0391995	AKT3; ADCY1; ADCY3; ADCY5; ADCY6; ADCY7; ADCY9; E2F3; ETS1; ETS2; PIK3R5; SLC25A4; GSK3B; HLA-DMA; HLA-DMB; HLA-DPB1; HLA-DRA; HLA-DRB1; XIAP; ICAM1; IL15; IL15RA; ITGAL; ITGB2; JAK3; LCK; LTA; SMAD3; MSX1; ATF3; ATM; NFATC2; NFATC4; NFKBIA; WNT16; ANAPC11; PDGFRA; PIK3CD; PIK3R1; MAPK10; SPI1; TGFB2; TNF; WNT5A; WNT8B; FZD6; TLN2; IKBKG; NRP1; CCND3; CD3D; CD3E; TP53INP1;	53	1.56e-08
IFNG; FAS;	hsa05143: African trypanosomiasis	2	0.042024	F2RL1; ICAM1; FAS; IL10; IL12A; PRKCA; TNF;	7	0.0265663
AKT3; IGF1R; ITGA6; IRS1; MDM2; PPP2R5C; THBS2;	hsa04151: PI3K-Akt signaling pathway	7	0.0430914	AKT3; SGK2; CDK6; COMP; CSF1R; EFNA4; FGF13; FLT1; FN1; PIK3R5; COL24A1; GNG7; GNG11; ANGPT1; ANGPT2; GSK3B; GYS2; IGF1R; IL3RA; IL6R; ITGA6; IRS1; ITGA2; ITGAV; ITGB7; JAK3; KIT; LAMA3; LAMA5; LAMB1; MDM2; PDGFRA; PIK3CD; PIK3R1; GNG2; PPP2R2B; PRKCA; PRKCZ; PDGFC; PRL; SPP1; THBS2; THBS4; PDGFD; ITGA8; IKBKG; FGF18; FGF16; CCND3; CCNE2; LPAR2; FGF19;	52	2.98e-05
AKT3; IGF1R; ANAPC7;	hsa04914: Progesterone-mediated oocyte maturation	3	0.0471745	AKT3; ADCY1; ADCY3; ADCY5; ADCY6; ADCY7; ADCY9; PIK3R5; IGF1R; PDE3B; ANAPC11; PIK3CD; PIK3R1; MAPK10; RPS6KA1; RPS6KA3; CCNA1; CDC25B;	18	0.000464935
ITGA6; PRKAG1; TGFB2;	hsa05410: Hypertrophic cardiomyopathy (HCM)	3	0.0484864	DMD; AGT; ITGA6; ITGA2; ITGAV; ITGB7; SGCD; SGCG; TGFB2; ACTG1; TNF; TNNT2; CACNA1C; CACNA2D1; ITGA8; CACNA2D2; CACNA2D4;	17	0.0012791
AKT3; DDB2; FAS; TGFB2;	hsa05161: Hepatitis B	4	0.0497663	AKT3; CDK6; E2F3; PTK2B; PIK3R5; APAF1; FAS; SMAD3; NFATC2; NFATC4; NFKBIA; PIK3CD; PIK3R1; PRKCA; MAPK10; STAT2; STAT3; TGFB2; TNF; CASP8; IKBKG; CCNA1; CCNE2;	23	0.00303399

## Sheet: Table S2_F
24 Cis lncRNAs correlated with genes activated in signalling pathways in Ph-like subytpe
Cis PC genes	Ph-like specific lncRNAs	Pearson correlation rate	P-value
ERG	AC009970.1	0.652674	3.05109e-11
AGAP1	AC091814.3	0.575198	1.5847e-08
AGAP1	AGAP1-IT1	0.803279	1.09106e-19
AKT3	AKT3-IT1	0.697383	3.36559e-13
AGAP1	CRYM-AS1	0.709092	8.99669e-14
ERG	FLNB-AS1	0.564872	3.23788e-08
AGAP1	IGF2-AS	0.568906	2.45637e-08
IFNG	MIAT	0.551637	7.81247e-08
MLLT4	MLLT4-AS1	0.748578	6.22691e-16
AGAP1	RGMB-AS1	0.618785	5.80382e-10
IFNG	RP11-1094M14.5	0.606262	1.5799e-09
AGAP1	RP11-125B21.2	0.609959	1.1809e-09
ERG	RP11-228B15.4	0.634005	1.61634e-10
ERG	RP11-229P13.20	0.560758	4.27525e-08
AGAP1	RP11-332H18.4	0.57362	1.77037e-08
AGAP1	RP11-366M4.3	0.774198	1.46513e-17
AKT3	RP11-382A20.2	0.609712	1.20424e-09
ERG	RP11-473M20.7	0.557014	5.48771e-08
AGAP1	RP11-481J2.2	0.598489	2.87897e-09
AGAP1	RP11-735G4.1	0.685387	1.22006e-12
AGAP1	RP11-744N12.3	0.592322	4.58226e-09
AGAP1	RP11-80H8.4	0.621568	4.61757e-10
ERG	SOCS2-AS1	0.592342	4.5755e-09
AGAP1	ZEB2-AS1	0.559931	4.51889e-08

## Sheet: Table S2_G
20 lncRNAs correlated with its Trans PC genes which are activated in signaling pathways in Ph-like subytpe
Trans PC genes	Ph-like specific lncRNAs	Pearson correlation rate	P-value
NRXN3	AC007463.2	0.64252	7.66291e-11
SMARCA2	CTB-118N6.3	0.698305	3.04035e-13
BANK1	CTB-118N6.3	0.678562	2.47063e-12
ITPR1	CTB-118N6.3	0.672838	4.40172e-12
LDLRAD4	CTB-118N6.3	0.664087	1.03858e-11
NRXN3	CTB-118N6.3	0.641062	8.72218e-11
FAM65B	CTB-118N6.3	0.620183	5.17566e-10
COL23A1	CTB-118N6.3	0.587749	6.42764e-09
SERINC5	CTC-458I2.2	0.949826	3.88747e-42
SDCCAG8	CTC-458I2.2	0.657775	1.89571e-11
SDCCAG8	CTC-458I2.2	0.657775	1.89571e-11
SMARCA2	CTC-458I2.2	0.644671	6.32317e-11
BANK1	CTC-458I2.2	0.61215	9.91962e-10
FLNB	CTC-458I2.2	0.590927	5.08344e-09
FUT8	CTC-458I2.2	0.576387	1.45727e-08
PHYKPL	CTD-2509G16.5	0.568425	2.53917e-08
ITPR1	EGOT	0.740299	1.90235e-15
FLNB	FLNB-AS1	0.895278	8.02189e-30
SERINC5	FLNB-AS1	0.59428	3.95804e-09
CNTNAP3B	LINC00937	0.602141	2.17611e-09
NAMPT	LINC00937	0.563196	3.62771e-08
TRPM6	LINC00937	0.561551	4.05353e-08
GOLGA8O	LINC01071	0.5947	3.83487e-09
SDCCAG8	LINC01071	0.578028	1.29723e-08
BANK1	LINC01071	0.572199	1.95517e-08
JPH1	LINC01071	0.569169	2.41229e-08
SMARCA2	LINC01071	0.566656	2.86682e-08
NRXN3	LINC01071	0.559143	4.76318e-08
FUT8	LINC01071	0.555019	6.26072e-08
NRXN3	RP11-1023P17.2	0.584958	7.8822e-09
COL23A1	RP11-1259L22.1	0.678931	2.37938e-12
BANK1	RP11-1259L22.1	0.593993	4.04401e-09
SMARCA2	RP11-1259L22.1	0.58882	5.94084e-09
MDFIC	RP11-1259L22.1	0.55559	6.02959e-08
SHROOM3	RP11-359D14.2	0.797194	3.24754e-19
KCNMA1	RP11-443A13.5	0.60169	2.25297e-09
KCNMA1	RP11-443A13.5	0.60169	2.25297e-09
ANKRD30B	RP11-527H14.4	0.848801	7.51163e-24
PCDH9	RP11-527H14.4	0.699648	2.6205e-13
PTPRM	RP11-527H14.4	0.64551	5.86406e-11
ID4	RP11-527H14.4	0.641803	8.16766e-11
DMD	RP11-527H14.4	0.640796	8.92968e-11
HEY2	RP11-527H14.4	0.62458	3.59646e-10
AOX1	RP11-527H14.4	0.587652	6.47357e-09
GBX2	RP11-527H14.4	0.553342	6.98946e-08
LDLRAD4	RP11-53B2.4	0.635673	1.39902e-10
SMARCA2	RP11-53B2.4	0.59044	5.27071e-09
SEPT9	RP11-53B2.4	0.553195	7.05714e-08
NRXN3	RP11-53B2.4	0.553059	7.12009e-08
CTGF	RP11-69I8.3	0.786703	1.95666e-18
MDFIC	RP11-69I8.3	0.578295	1.2729e-08
PNLDC1	RP11-69I8.3	0.555377	6.11473e-08
GPHN	RP11-72M17.1	0.55968	4.59525e-08
GPHN	RP11-72M17.1	0.55968	4.59525e-08
SDCCAG8	RP11-96H19.1	0.665959	8.66422e-12
BANK1	RP11-96H19.1	0.657339	1.97499e-11
SLC38A4	RP11-96H19.1	0.623813	3.83356e-10
FUT8	RP11-96H19.1	0.613674	8.78029e-10
ZNF717	RP11-96H19.1	0.578934	1.21629e-08
SMARCA2	RP11-96H19.1	0.578324	1.27024e-08
FGGY	RP11-96H19.1	0.557384	5.35468e-08
KCNQ5	SENCR	0.609103	1.26364e-09
PCDH9	SENCR	0.581916	9.82338e-09
RRAS2	SPON1	0.583722	8.62181e-09

## Sheet: Table S2_H
The output contains result using KEGG as reference database in GeneSCF tool for highly correlated cis PC genes from DE lncRNAs in Ph-like subtype
Cis PC genes correlated with Ph-like DE lncRNAs (Gene Symbols)	Process	Number of cis PC genes correlated with Ph-like DE lncRNAs	P-value
AKT3; ADCY6; ETS2; IL2RA; IL15RA; STAT5B; FZD6; TP53INP1;	hsa05166: HTLV-I infection	8	3.63e-05
SERPINB1; IFNG; SERPINB9; PLCB2; ACTN1;	hsa05146: Amoebiasis	5	0.00016629
AKT3; CDK6; IFNG; IL2RA; STAT5B;	hsa05162: Measles	5	0.000416588
AKT3; IFNG; IL2RA; IL15RA; STAT5B;	hsa04630: Jak-STAT signaling pathway	5	0.000857366
AKT3; ADCY6; PLCB2; PRKCZ; STAT5B;	hsa04062: Chemokine signaling pathway	5	0.0019807
CD99; MLLT4; NCF4; ACTN1;	hsa04670: Leukocyte transendothelial migration	4	0.00224936
AKT3; MLLT4; PRKCZ; ACTN1;	hsa04530: Tight junction	4	0.00350615
AKT3; CDK6; STAT5B;	hsa05220: Chronic myeloid leukemia	3	0.0048695
AKT3; ADCY6; PLCB2;	hsa04915: Estrogen signaling pathway	3	0.0112258
IFNG; PLCB2;	hsa05143: African trypanosomiasis	2	0.0113602
ADCY6; PLCB2; FZD6;	hsa04916: Melanogenesis	3	0.011522
AKT3; IFNG; PLCB2;	hsa05142: Chagas disease (American trypanosomiasis)	3	0.0127518
AGAP1; EHD4; IL2RA; PRKCZ;	hsa04144: Endocytosis	4	0.0142376
AKT3; ADCY6; PLCB2;	hsa04725: Cholinergic synapse	3	0.015429
AKT3; CDK6; SMO; STAT5B; FZD6;	hsa05200: Pathways in cancer	5	0.0170938
AKT3; PLCB2;	hsa04973: Carbohydrate digestion and absorption	2	0.0188793
AKT3; IGF2; SMO; FZD6;	hsa05205: Proteoglycans in cancer	4	0.0201336
IRS1; PRKCZ;	hsa04930: Type II diabetes mellitus	2	0.021209
ADCY6; PLCB2;	hsa04961: Endocrine and other factor-regulated calcium reabsorption	2	0.021209
AKT3; CDK6; IL2RA; IRS1; PRKCZ;	hsa04151: PI3K-Akt signaling pathway	5	0.0213935
AKT3; IFNG; NCF4;	hsa04380: Osteoclast differentiation	3	0.0243092
ADCY6; PLCB2;	hsa04742: Taste transduction	2	0.025341
AKT3; CDK6;	hsa05223: Non-small cell lung cancer	2	0.0262036
AKT3; IRS1; PRKCZ;	hsa04910: Insulin signaling pathway	3	0.0266398
SMO; FZD6;	hsa05217: Basal cell carcinoma	2	0.0270781
AKT3; STAT5B;	hsa05221: Acute myeloid leukemia	2	0.0288619
AKT3; CDK6; STAT5B;	hsa05161: Hepatitis B	3	0.0306089
AKT3; IRS1;	hsa04150: mTOR signaling pathway	2	0.0316232
AKT3; CDK6;	hsa05214: Glioma	2	0.0364455
IFNG; IL2RA; IL15RA; ACVR2B;	hsa04060: Cytokine-cytokine receptor interaction	4	0.0367259
AKT3; CDK6;	hsa05212: Pancreatic cancer	2	0.0374419
AKT3; IRS1;	hsa04920: Adipocytokine signaling pathway	2	0.0425779
AKT3; CDK6;	hsa05218: Melanoma	2	0.0425779
AKT3; STAT5B;	hsa04917: Prolactin signaling pathway	2	0.0436351
ADCY6; PLCB2;	hsa04918: Thyroid hormone synthesis	2	0.0436351
ADCY6; EPHX1;	hsa04976: Bile secretion	2	0.0436351
MLLT4; ACTN1;	hsa04520: Adherens junction	2	0.044702
ADCY6; PLCB2;	hsa04971: Gastric acid secretion	2	0.0468647
CACNB3; ACTN1;	hsa05412: Arrhythmogenic right ventricular cardiomyopathy (ARVC)	2	0.0468647
AKT3; IFITM1;	hsa04662: B cell receptor signaling pathway	2	0.0479602
IFNG; NCF4;	hsa05140: Leishmaniasis	2	0.0479602
ERG; BCL6; SPINT1;	hsa05202: Transcriptional misregulation in cancer	3	0.0493881

## Sheet: Table S2_I
	The output contains result using KEGG as reference database in GeneSCF tool for highly correlated trans (genomic size >100 kb) PC genes from DE lncRNAs in Ph-like subtype
Trans PC genes correlated with Ph-like DE lncRNAs	Process	Number of trans PC genes correlated with Ph-like DE lncRNAs	P-value
ETS1; ETS2; RRAS2; JUN; PPP3CC; CRTC3; TLN2;	hsa05166: HTLV-I infection	7	0.000189488
ETS1; ETS2; SPIRE1;	hsa04320: Dorso-ventral axis formation	3	0.000208037
KCNMB2; ITPR1; KCNMA1; PRKCH; PRKCQ;	hsa04270: Vascular smooth muscle contraction	5	0.000295787
GADD45G; DUSP4; RRAS2; FLNB; JUN; PPP3CC;	hsa04010: MAPK signaling pathway	6	0.00102932
FLNB; JUN; THBS1; THBS4; TLN2;	hsa04510: Focal adhesion	5	0.00219067
FUT8; CHST2;	hsa00533: Glycosaminoglycan biosynthesis - keratan sulfate	2	0.00237188
RRAS2; FLNB; HIF1A; ITPR1; THBS1;	hsa05205: Proteoglycans in cancer	5	0.00323365
ETS1; HIF1A; JUN;	hsa05211: Renal cell carcinoma	3	0.0032694
NAMPT; AOX1;	hsa00760: Nicotinate and nicotinamide metabolism	2	0.00731584
JUN; PPP3CC; PRKCQ;	hsa04660: T cell receptor signaling pathway	3	0.0121568
HAAO; AOX1;	hsa00380: Tryptophan metabolism	2	0.0140047
PLXNC1; PPP3CC; SLIT2;	hsa04360: Axon guidance	3	0.0200239
ITPR1; ARNTL; PPP3CC;	hsa04728: Dopaminergic synapse	3	0.0200239
THBS1; THBS4;	hsa05144: Malaria	2	0.0202275
RRAS2; PRKCH; PRKCQ;	hsa04530: Tight junction	3	0.021214
FCGR1A; JUN; PPP3CC;	hsa04380: Osteoclast differentiation	3	0.0216192
TRPM6; SLC8A1;	hsa04978: Mineral absorption	2	0.0217409
NCAM2; PTPRM; NRXN3;	hsa04514: Cell adhesion molecules (CAMs)	3	0.0263554
AOX1;	hsa00750: Vitamin B6 metabolism	1	0.0295918
CTGF; ID4; TEAD1;	hsa04390: Hippo signaling pathway	3	0.031104
FCGR1A; THBS1; THBS4;	hsa04145: Phagosome	3	0.031602
GADD45G; THBS1;	hsa04115: p53 signaling pathway	2	0.0363561
JUN; PPP3CC;	hsa05031: Amphetamine addiction	2	0.0382678
ITPR1; PPP3CC;	hsa04720: Long-term potentiation	2	0.0392378
JUN; PPP3CC;	hsa04662: B cell receptor signaling pathway	2	0.0442255
SEPT9; SEPT11;	hsa05100: Bacterial invasion of epithelial cells	2	0.0442255
FCGR1A; JUN;	hsa05140: Leishmaniasis	2	0.0442255
SLC8A1; TPM1;	hsa04260: Cardiac muscle contraction	2	0.04525
ITPR1; PPP3CC; SLC8A1;	hsa04020: Calcium signaling pathway	3	0.0460002
ID4; THBS1;	hsa04350: TGF-beta signaling pathway	2	0.0494344

[truncated: 1 more sheets: Table S2_J]
