# Supplementary material for: Long non-coding RNAs defining major subtypes of B cell precursor acute lymphoblastic leukemia
Source: J Hematol Oncol. 2019 Jan 14;12:8. doi: 10.1186/s13045-018-0692-3 (PMC6332539; doi:10.1186/s13045-018-0692-3)
Supplement: Supplementary file 4 — Table S3. The relapse-specific lncRNAs from three subtypes. The lncRNAs involved in functions from DUX4 subtype (XLSX 371 kb) [file 13045_2018_692_MOESM4_ESM.xlsx]

## Sheet: Table description
The relapse-specific lncRNAs from three subtypes. The lncRNAs involved in functions from DUX4 subtype
Table S3_A. Relapse-specific DUXS3 ID vs REL: 570 relapse-specific DE lncRNAs from DUXS3 subtype. We analyzed the fold change of ID versus REL samples within DUX4 subtype to find relapse-specific lncRNAs using LIMMA Voom R package.
Table S3_B. Relapse-specific Ph-like ID vs REL: 113 relapse-specific DE lncRNAs from Ph-like subtype. We analyzed the fold change of ID versus REL samples within Ph-like subtype to find relapse-specific lncRNAs using LIMMA Voom R package.
Table S3_C. Relapse-specific NH-HeH ID vs REL: 258 relapse-specific DE lncRNAs from NH-HeH subtype. We analyzed the fold change of ID versus REL samples within NH-HeH subtype to find relapse-specific lncRNAs using LIMMA Voom R package.
Table S3_D. Positively correlated relapse-specific lncRNAs in DUX4 with its cis PC genes: 321 relapse-specific lncRNAs in DUXS3 correlated with its cis protein coding genes and activated in signaling and metabolic pathways in the DUXS3 subtype. The cis protein coding genes (within 100 Kb) for the Ph-like specific lncRNAs, obtained from GREAT.
Table S3_E. Functions based on relapse-specific DUX4 lncRNAs: Gene enrichment analysis results for nearby protein coding gene hits within 100 kb of relapse-specific DE lncRNAs from DUX4 subtype. The output contains results using KEGG as reference database in GeneSCF tool.
Table S3_F. Overlap between relapse-specific lncRNAs and S-phase lncRNAs: The relapse-specific lncRNAs overlapped with S-phase lncRNAs. The significance of overlap is determined using hypergeometric test.
Table S3_I. DUX4 specific lncRNAs associated with Metabolic pathways: The relapse-specific lncRNAs within DUXS3 subtype co-expressed with PC genes which are activated in metabolic pathway. The PC genes are in proximity of >100 Kb, obtained from GREAT. The table contains the lncRNAs (highlighted) which are overlapped with recently published list of lncRNAs synergistically dysregulate metabolic pat…

## Sheet: Table S3_A
The table contain the list of 570 DUX4 relapse-specific lncRNAs between ID and REL samples obtained using LIMMA voom
Geneid	Log Fold change	P-value	Gene_sym	Gene_type	AE14_ID	AE14_REL	AL26_ID	PE02_ID	PE02_REL	PE08_ID	PE08_REL	PE09_ID	PE09_REL	PE11_ID	PE11_REL	PL01_ID	PL01_REL	PL02_ID	PL02_REL	PL03_ID	PL03_REL	PL04_ID	PL04_REL	PL11_ID	PL11_REL	PL12_ID	PL12_REL
ENSG00000271797	1.8237	9.52e-08	CTC-428G20.6	antisense	-2.15921	-0.890153	-1.79302	-1.20467	-6.0449	-2.27013	-6.27175	-3.59843	-6.74694	-1.74862	-6.30784	-0.696197	-6.63607	-2.50965	-5.91459	-2.55511	-5.86522	-2.1276	-6.45907	-1.07564	-5.85018	-2.14691	-5.24796
ENSG00000223561	1.60645	7.61e-07	AC003090.1	lincRNA	-1.33608	-2.319	0.913931	2.33071	-2.13801	2.32429	0.716937	1.54259	-1.70254	1.79928	-2.40095	0.842223	-1.14422	0.476414	-1.66667	1.8266	-3.54329	0.321712	-1.60109	0.612412	-5.85018	1.66835	-1.54752
ENSG00000263327	1.41359	7.67e-07	TAPT1-AS1	antisense	3.74953	-2.56	2.31427	4.07472	1.80685	4.83454	4.04	3.15837	0.0212469	3.76262	0.586978	4.58214	3.02392	3.65255	1.05119	4.29616	1.85588	2.99533	0.552159	4.09576	0.127097	4.60283	0.941867
ENSG00000197989	-0.704003	9.54e-07	SNHG12	antisense	4.05175	4.54947	3.65285	3.5901	5.54053	3.55742	5.57178	3.71963	4.89737	4.06656	5.76597	5.11075	5.08631	4.72729	5.80351	4.11405	6.29055	4.18179	4.843	3.44326	6.0824	3.49473	5.06152
ENSG00000260876	1.58834	1.78e-06	RP11-345M22.1	lincRNA	-1.00167	-6.01944	-0.45422	-0.391755	-6.0449	-0.451966	-1.62789	-0.572891	-1.99205	-0.914626	-3.13792	-0.651109	-1.99222	-0.377196	-3.10724	-0.27827	-3.54329	-0.336182	-0.392979	1.30902	-5.85018	-0.355493	-5.24796
ENSG00000248138	1.66945	1.83e-06	RP11-446J8.1	antisense	-0.0267564	-6.01944	-1.48817	0.456241	-6.0449	1.104	-0.24938	0.692251	-2.84005	0.846763	-3.98591	-1.24721	-5.05111	1.33681	-1.39103	0.458696	-3.05786	-0.618581	-0.967215	1.32934	-1.32662	0.302401	-2.4406
ENSG00000235477	1.03684	2.14e-06	RP11-122G18.5	lincRNA	0.679512	-0.464847	1.799	1.34743	-0.835451	2.11494	0.328165	2.38538	1.04097	2.00859	-1.78428	1.59799	0.482867	0.684731	-1.66667	1.93921	-1.34166	0.400784	0.110788	1.20289	-1.45787	0.972833	-2.07803
ENSG00000187621	1.70012	2.82e-06	TCL6	processed_transcript	4.46566	-0.0886984	3.04136	8.01312	3.53818	7.68919	2.88054	6.70225	3.6161	6.08565	2.43699	7.10285	3.9517	5.52674	3.57525	6.0336	-0.192792	5.99015	5.50491	7.64786	1.9636	6.67155	4.86969
ENSG00000223960	0.612529	3.06e-06	AC009948.5	antisense	4.58226	2.9607	4.90497	5.1371	3.71831	5.25137	4.32909	5.12706	4.69756	5.1034	3.57327	5.37058	4.50539	5.32276	3.39602	5.01416	3.10345	3.91175	3.48784	5.19807	4.2333	4.72346	2.96636
ENSG00000249635	1.51711	4.12e-06	RP11-710F7.3	antisense	-1.95276	-3.21208	-0.388631	0.155732	-1.95744	-0.178205	-1.22735	0.223576	-1.88896	-0.845913	-6.30784	-0.607388	-2.93563	-0.852534	-5.91459	-1.12627	-5.86522	-3.02068	-4.87411	-1.74307	-5.85018	-0.421081	-2.92603
ENSG00000232884	1.51525	4.72e-06	AF127936.3	lincRNA	-2.15921	-6.01944	-0.671031	0.215233	-3.72298	-1.23265	-0.845483	-0.475043	-3.0465	-1.31798	-6.30784	0.33775	-2.72918	-1.00063	-2.74467	-2.55511	-5.86522	-2.65811	-3.28914	-0.972551	-5.85018	0.492504	-3.663
ENSG00000231616	0.854908	5.03e-06	RP11-575L7.4	antisense	-0.502094	-1.26455	0.386302	0.765786	-0.316984	0.830673	-0.389104	-0.475043	-2.84005	0.825854	-1.66398	0.963148	-0.908154	0.866729	-2.0077	0.252245	-1.61729	0.00485521	-0.392979	0.769381	-0.805789	0.419441	-1.78853
ENSG00000267659	-1.23984	5.15e-06	RP11-118B18.1	lincRNA	-5.85965	-2.11255	-5.88048	-6.41412	-3.72298	-6.51806	-6.27175	-6.40578	-1.99205	-6.27218	-2.84841	-6.67348	-4.31415	-6.21009	-4.32963	-6.25555	-4.28026	-5.82803	-3.65171	-5.83053	-5.85018	-5.84735	-1.34107
ENSG00000249881	1.46099	8e-06	CTB-57H20.1	sense_overlapping	0.881821	-6.01944	1.03838	3.40446	0.104843	2.40379	0.573743	1.85631	0.687691	1.32028	-3.98591	1.56014	0.419208	1.57782	0.235152	2.27193	-0.579816	1.92016	0.282399	2.08236	-2.14974	1.44727	-2.07803
ENSG00000248115	1.06646	8.17e-06	RP11-752D24.2	antisense	1.05922	-2.319	0.494555	1.03709	-1.65259	1.66682	0.62307	2.47992	0.452735	1.14567	-0.753251	1.04762	0.482867	1.52462	-2.0077	1.7943	-3.05786	1.41037	0.700803	1.40787	-0.992202	2.44267	0.941867
ENSG00000240888	1.25715	8.33e-06	RP13-635I23.3	sense_intronic	-2.68972	-6.01944	-1.1256	-2.50723	-2.58547	-1.3086	-2.81232	-2.15785	-3.93958	-3.10225	-6.30784	-1.8155	-2.93563	-2.50965	-4.32963	-2.34866	-5.86522	-3.02068	-6.45907	-1.74307	-5.85018	-0.637893	-3.663
ENSG00000214797	-1.66451	8.51e-06	RP11-1036E20.9	lincRNA	-5.85965	-0.809982	-2.42105	-6.41412	-0.372479	-6.51806	-1.74819	-6.40578	-2.84005	-6.27218	-1.09839	-2.97304	-1.99222	-6.21009	-5.91459	-6.25555	-1.61729	-5.82803	-1.17367	-5.83053	-5.85018	-5.84735	-2.07803
ENSG00000188825	1.20939	1.17e-05	LINC00910	lincRNA	4.33388	1.72876	3.23586	4.0707	0.825461	2.19962	0.522668	4.15932	1.07961	4.28145	-1.35364	4.44482	3.65969	3.79974	0.685318	3.3162	-0.373365	2.15496	1.83095	1.73171	-0.564781	2.05352	1.91191
ENSG00000230124	1.3535	1.18e-05	RP5-1180C10.2	antisense	2.48465	-1.62712	4.32041	4.29926	1.50199	4.59112	3.1774	5.23311	4.20508	4.46507	0.586978	5.1399	3.71597	3.7043	0.107773	3.88272	-1.11033	2.1086	1.99626	4.01339	-0.492631	3.81621	1.41025
ENSG00000257746	-1.22577	1.23e-05	RP11-202G11.2	lincRNA	-5.85965	-3.21208	-5.88048	-6.41412	-2.87498	-6.51806	-2.36486	-6.40578	-2.84005	-4.68722	-3.13792	-6.67348	-3.82872	-3.40273	-3.59267	-6.25555	-2.16478	-5.82803	-1.50487	-5.83053	-5.85018	-5.84735	-5.24796
ENSG00000259920	1.22545	1.26e-05	RP11-2E11.5	lincRNA	-5.85965	-6.01944	-1.79302	-2.32666	-6.0449	-2.27013	-6.27175	-2.70534	-6.74694	-2.81275	-6.30784	-6.67348	-6.63607	-3.40273	-5.91459	-3.44819	-5.86522	-5.82803	-6.45907	-3.5086	-5.85018	-3.03999	-5.24796
ENSG00000261474	1.04374	1.3e-05	RP11-452L6.1	lincRNA	1.67174	-2.56	2.39098	1.33407	0.294946	1.90401	0.522668	2.95835	0.583979	1.78852	-1.66398	1.46095	0.523797	1.39724	-2.0077	0.863391	-1.4729	-0.618581	-0.4367	1.13525	-0.64073	0.972833	-0.724396
ENSG00000225032	0.872271	1.42e-05	RP11-228B15.4	antisense	4.52729	0.423508	3.89265	4.83913	2.63809	5.87614	3.30379	6.15336	3.76778	5.02989	3.79151	4.53415	4.0927	4.99142	2.25031	4.2212	2.83869	4.21225	4.45756	4.76099	3.42827	4.90838	2.80189
ENSG00000197585	1.26594	1.51e-05	AC107218.3	antisense	-1.61172	-6.01944	-1.23663	-3.2442	-6.0449	-1.76317	-3.94982	-2.94635	-3.0465	-1.62832	-6.30784	-3.21405	-6.63607	-2.12262	-2.74467	-1.39757	-5.86522	-2.1276	-3.65171	-1.5826	-3.04283	-0.89315	-2.92603
ENSG00000233261	1.24718	1.61e-05	LINC00264	lincRNA	-0.244937	-1.49587	3.10536	1.96526	-0.430194	1.90401	1.52915	2.92737	-0.239143	2.94457	-1.44986	2.02349	1.45668	1.85061	-1.15971	3.07761	-3.54329	2.25411	1.52393	2.32429	-1.20633	1.42878	0.424468
ENSG00000217258	1.02251	1.76e-05	AC007249.3	lincRNA	-3.05229	-6.01944	-3.07313	-2.95469	-6.0449	-3.34813	-4.68678	-4.08385	-5.16197	-3.95025	-6.30784	-3.86612	-6.63607	-2.12262	-5.91459	-3.08562	-5.86522	-3.02068	-4.87411	-5.83053	-5.85018	-3.52542	-3.663
ENSG00000260744	1.44713	1.88e-05	RP11-329J18.3	antisense	-2.40021	-2.84951	-0.45422	-1.77027	-6.0449	-1.23265	-1.06229	-2.31832	-6.74694	-1.31798	-3.13792	-2.42555	-1.88119	-3.04016	-5.91459	-1.73199	-5.86522	-1.92114	-6.45907	-0.338679	-5.85018	-1.75988	-5.24796
ENSG00000253424	0.957368	1.93e-05	CTC-436K13.3	lincRNA	0.117634	-3.21208	-0.265775	-0.483386	-1.95744	1.04419	-0.294468	1.28771	-0.864294	0.927494	-1.78428	-0.103621	-0.128279	-0.0603393	-3.59267	0.0843002	-2.16478	1.09083	-0.481788	0.937653	-0.64073	-0.292757	-2.4406
ENSG00000228956	0.665555	2.25e-05	AC144521.1	processed_transcript	3.80391	1.90538	4.73331	4.47234	3.19589	5.17587	4.3927	5.53417	3.87603	4.55039	2.51553	3.4977	3.83865	4.92755	3.31182	5.29952	2.83175	4.13341	3.58942	4.04752	2.83281	4.5047	2.8967
ENSG00000260011	1.24445	2.34e-05	RP13-20L14.1	lincRNA	-2.15921	-6.01944	-1.97359	-2.32666	-2.87498	-2.81762	-6.27175	-2.31832	-6.74694	-2.81275	-6.30784	-2.28116	-2.72918	-2.50965	-3.59267	-3.08562	-5.86522	-2.3686	-1.93551	-1.30697	-5.85018	-2.38791	-5.24796
ENSG00000253878	1.18126	2.34e-05	RP11-347C18.3	sense_intronic	2.05324	-3.21208	0.30934	2.06566	-0.212014	2.09297	0.442498	0.00361017	0.329878	1.07655	-1.66398	1.88494	-2.24376	-1.0808	-2.0077	1.40979	-3.05786	1.82302	0.700803	1.44559	-1.20633	1.07152	-1.00003
ENSG00000269609	0.830023	2.75e-05	RP11-18I14.10	processed_transcript	2.65999	1.38144	4.26035	4.17927	2.36872	3.71676	3.85367	3.86218	2.74291	4.57253	1.81628	3.6983	2.98415	4.01993	2.38461	4.27681	1.53566	2.83374	2.48638	3.48462	-0.423919	3.03224	0.901789
ENSG00000231816	1.15957	2.87e-05	RP4-782L23.1	lincRNA	-5.85965	-6.01944	-3.07313	-4.0922	-6.0449	-2.12574	-3.94982	-2.49889	-3.93958	-2.18472	-6.30784	-2.14991	-6.63607	-3.04016	-5.91459	-3.44819	-3.05786	-3.50611	-6.45907	-2.66061	-5.85018	-2.38791	-5.24796
ENSG00000215424	0.641905	3.03e-05	MCM3AP-AS1	antisense	1.83384	1.55799	3.04729	3.50325	1.83161	3.64811	2.4798	3.38049	2.79803	3.61809	1.22354	3.71346	2.73679	3.21408	1.6011	2.63623	0.764139	2.22181	1.41745	3.41026	2.37382	3.51679	1.64686
ENSG00000224616	0.77007	3.19e-05	RP11-305E17.6	antisense	-0.90545	-2.319	-0.388631	0.0616101	-2.87498	-0.736696	-1.41377	-1.76192	-2.10308	0.170765	-2.6074	-1.31592	-1.59168	-0.279349	-1.82713	-0.189461	-2.16478	-0.783641	-2.55218	-1.07564	-1.94329	0.562045	-1.78853
ENSG00000261971	0.81221	3.4e-05	RP11-473M20.7	antisense	3.5001	1.46438	5.21161	3.30527	3.21954	4.63233	3.32258	5.16645	3.80477	4.43777	3.24098	3.71991	2.44341	3.76576	1.87331	2.9612	1.05365	2.61905	1.36748	3.96551	1.48073	4.65549	2.18667
ENSG00000233852	1.14769	3.94e-05	AC005304.1	lincRNA	-5.85965	-6.01944	-3.55856	-2.50723	-3.23755	-4.93309	-6.27175	-1.36139	-3.57701	-2.18472	-6.30784	-2.76659	-6.63607	-3.88816	-5.91459	-3.44819	-5.86522	-3.02068	-4.87411	-1.92364	-5.85018	-2.38791	-5.24796
ENSG00000231842	1.02797	4.3e-05	RP11-527F13.1	lincRNA	-5.85965	-6.01944	-2.42105	-2.50723	-4.45994	-2.43059	-3.46439	-2.49889	-5.16197	-2.57174	-6.30784	-3.86612	-6.63607	-3.40273	-5.91459	-3.93362	-5.86522	-4.24307	-4.13714	-3.5086	-5.85018	-2.38791	-5.24796
ENSG00000258695	1.08339	4.48e-05	RP3-414A15.2	antisense	-1.61172	-3.21208	-1.0225	-0.859534	-4.45994	-1.23265	-1.51686	-0.102	-1.61765	-0.599753	-3.50049	-1.31592	-2.54861	-1.16569	-3.59267	-2.55511	-5.86522	-3.02068	-2.55218	-1.74307	-4.26522	-0.89315	-5.24796
ENSG00000253449	0.73096	4.5e-05	CTC-436K13.6	lincRNA	0.071091	-3.21208	-0.208059	-0.581233	-2.34446	0.352309	-0.914195	-0.102	-1.07451	0.966227	-1.55295	-0.298438	-0.705337	-0.0603393	-1.27074	-0.42266	-1.00724	0.711124	-0.677708	0.100206	-0.7209	0.381473	-2.07803
ENSG00000179406	0.634164	4.52e-05	LINC00174	lincRNA	3.46453	2.41936	4.18964	4.0907	3.27025	4.27555	4.28954	5.28727	3.35241	3.9482	2.47679	4.52926	2.23737	3.91533	1.70746	4.11623	2.11778	3.54918	3.90178	3.93931	2.14417	3.65449	2.97604
ENSG00000254810	-1.89432	4.72e-05	RP11-672A2.4	lincRNA	-1.77218	-0.0886984	-5.88048	-6.41412	0.183915	-6.51806	-1.22735	-6.40578	-6.74694	-6.27218	0.199955	-6.67348	-2.38815	-2.3032	1.87331	-3.44819	0.876249	-5.82803	-4.13714	-5.83053	0.0324598	-5.84735	-3.663
ENSG00000245213	0.833741	4.95e-05	RP11-10K16.1	antisense	2.77335	-1.06524	2.66255	3.40765	1.13501	3.74286	2.55798	2.80611	2.67302	2.5059	0.930565	3.5027	2.59034	2.52123	0.95577	2.27973	-0.310629	2.89648	2.79596	3.14961	0.127097	3.14418	1.12708
ENSG00000241163	-1.32932	5.52e-05	LINC00877	lincRNA	-2.15921	1.49626	-2.71056	-3.60677	2.29049	-1.66007	-1.62789	-6.40578	0.241747	-2.18472	0.135103	-2.28116	1.22811	-1.25589	-0.081705	-3.44819	-0.911021	-0.40177	0.552159	-0.621078	-0.64073	0.0352971	1.69456
ENSG00000258809	0.948635	5.61e-05	CTD-2555O16.1	lincRNA	-3.53772	-6.01944	-3.07313	-3.2442	-4.45994	-3.05862	-6.27175	-2.94635	-3.93958	-3.46482	-6.30784	-3.21405	-6.63607	-2.75065	-5.91459	-3.93362	-5.86522	-5.82803	-4.87411	-4.24557	-4.26522	-3.03999	-5.24796
ENSG00000241679	0.756615	5.86e-05	RP11-80H8.4	lincRNA	4.09018	0.899427	2.93009	3.87935	2.87098	4.33915	1.85237	5.51122	3.34185	3.1893	2.3324	5.1383	3.79333	3.95356	2.85689	4.50017	2.22754	4.20951	3.12777	4.70766	4.35561	5.18125	3.34823
ENSG00000236066	1.29415	6.11e-05	RP11-389O22.1	lincRNA	-2.15921	-6.01944	-0.0991247	-2.32666	-4.45994	-1.23265	-1.62789	-0.215956	-2.10308	-0.24981	-4.72288	0.506432	-1.88119	-2.50965	-2.45516	-0.897998	-5.86522	-3.50611	-6.45907	-1.5826	-3.04283	-0.89315	-3.663
ENSG00000263011	0.935474	6.14e-05	RP11-473M20.11	sense_overlapping	-4.27468	-6.01944	-2.71056	-2.95469	-4.45994	-2.61116	-6.27175	-2.15785	-3.57701	-2.81275	-6.30784	-3.21405	-3.17664	-2.50965	-5.91459	-3.44819	-4.28026	-4.24307	-4.87411	-3.02318	-4.26522	-3.03999	-5.24796
ENSG00000228481	1.1948	6.26e-05	U51244.2	antisense	-3.53772	-6.01944	-2.18004	-0.987859	-3.23755	-2.61116	-1.62789	-0.913928	-2.35462	-1.06272	-6.30784	-1.38807	-2.93563	-2.12262	-2.45516	-1.50066	-3.54329	-0.970054	-3.65171	-0.54513	-5.85018	-0.989365	-5.24796
ENSG00000267784	1.05067	6.31e-05	RP11-171I2.1	antisense	-5.85965	-6.01944	-5.88048	-3.60677	-6.0449	-3.7107	-6.27175	-2.70534	-6.74694	-6.27218	-6.30784	-2.97304	-6.63607	-3.40273	-5.91459	-3.44819	-5.86522	-5.82803	-6.45907	-3.02318	-5.85018	-1.75988	-5.24796
ENSG00000233840	1.2935	7.02e-05	PCDH9-AS4	antisense	-4.27468	-6.01944	-5.88048	-0.632764	-6.0449	-0.903346	-3.46439	-3.59843	-6.74694	-1.4142	-6.30784	-1.91859	-3.17664	-2.3032	-5.91459	-2.55511	-5.86522	-4.24307	-3.65171	-1.74307	-5.85018	-4.26238	-5.24796
ENSG00000271199	1.0116	7.11e-05	RP13-216E22.5	sense_overlapping	-1.95276	-6.01944	-1.63256	-2.32666	-3.23755	-2.12574	-3.10182	-1.76192	-3.57701	-2.18472	-6.30784	-2.42555	-3.82872	-2.12262	-3.59267	-2.34866	-2.40579	-4.24307	-4.87411	-2.3711	-5.85018	-2.67742	-5.24796
ENSG00000236778	0.756449	7.27e-05	INTS6-AS1	antisense	2.24364	0.946349	2.80251	2.77323	1.21248	2.73224	2.42522	2.79634	2.00461	2.97337	-0.753251	3.00776	1.99692	1.61646	0.389186	3.361	0.544173	0.741821	0.680483	2.24093	0.489667	3.12707	1.16143
ENSG00000267274	0.948463	7.39e-05	CTD-2006C1.12	sense_overlapping	-2.15921	-2.84951	-0.325896	-0.686203	-2.58547	0.0818574	-0.986345	0.560004	-1.46154	0.0316027	-3.13792	0.445464	-1.42662	-1.0808	-4.32963	-1.61169	-3.05786	-1.74057	-1.70418	-0.972551	-4.26522	-0.89315	-2.92603
ENSG00000245849	0.840556	7.75e-05	RAD51-AS1	processed_transcript	3.06813	0.130311	4.2083	4.17927	2.43488	3.40527	3.59708	4.44049	1.91484	3.71224	1.3575	4.02088	2.86576	3.55313	0.624564	3.43619	0.673941	1.57284	2.78648	2.6248	0.688976	3.22143	2.16989
ENSG00000254350	1.30848	7.9e-05	RP11-542A14.1	lincRNA	-2.68972	-6.01944	-2.18004	-1.36973	-3.23755	-0.143016	-0.294468	-1.19633	-2.65947	-0.00539154	-6.30784	-0.0441203	-1.77809	0.0936944	-1.82713	0.314306	-5.86522	-1.07315	-1.50487	-0.404267	-3.04283	0.0833914	-3.663
ENSG00000263618	1.16315	7.9e-05	RP11-527H14.4	lincRNA	0.583297	-6.01944	-0.265775	0.380293	-0.759502	0.794828	-0.779894	0.489037	-3.28751	0.0676719	-2.05991	-1.46402	-2.54861	-1.25589	-3.59267	0.799733	-3.05786	-0.542633	0.282399	0.739324	-2.68026	-1.20349	-2.07803
ENSG00000265204	0.927085	8.43e-05	RP11-403A21.3	antisense	-1.95276	-4.43447	-2.71056	-2.02181	-4.45994	-1.1605	-4.68678	-2.01346	-3.57701	-2.57174	-4.72288	-1.91859	-3.17664	-1.96216	-5.91459	-2.55511	-5.86522	-3.02068	-2.99964	-2.66061	-3.04283	-3.52542	-2.92603
ENSG00000237371	-1.03555	8.68e-05	RP13-152O15.5	antisense	-5.85965	-2.84951	-5.88048	-4.0922	-2.58547	-6.51806	-3.46439	-6.40578	-3.93958	-4.68722	-2.22038	-6.67348	-3.46615	-6.21009	-5.91459	-6.25555	-5.86522	-3.50611	-3.28914	-5.83053	-2.68026	-5.84735	-2.92603
ENSG00000225948	1.0869	8.82e-05	RP11-554I8.1	lincRNA	-3.05229	-6.01944	-1.63256	-1.89056	-2.58547	-2.12574	-6.27175	-1.5478	-2.65947	-3.46482	-6.30784	-3.50355	-3.46615	-3.04016	-5.91459	-2.55511	-3.05786	-1.92114	-3.28914	-2.66061	-5.85018	-1.75988	-5.24796
ENSG00000240291	0.618851	9.83e-05	RP11-499P20.2	antisense	2.24364	1.86931	2.53314	3.30527	2.63809	2.69869	2.23208	3.88769	1.95003	3.20153	1.28462	3.1258	2.18091	2.87472	1.39829	3.41511	0.284529	1.94675	1.68559	2.85246	0.378635	2.36697	2.23586
ENSG00000254826	-1.16627	0.000101523	CTD-2530H12.2	sense_intronic	-5.85965	-1.26455	-4.29552	-6.41412	-2.58547	-6.51806	-4.68678	-6.40578	-5.16197	-6.27218	-2.84841	-3.86612	-3.82872	-6.21009	-5.91459	-6.25555	-3.05786	-5.82803	-2.21114	-5.83053	-5.85018	-5.84735	-1.16049
ENSG00000272156	1.27084	0.00010286	RP11-477N3.1	lincRNA	-2.15921	-2.319	0.0967955	-0.987859	-6.0449	-0.84563	-0.717159	-0.851192	-3.0465	-0.986776	-3.50049	-0.444658	-1.59168	-0.783822	-5.91459	-0.372907	-5.86522	-2.3686	-3.65171	-1.30697	-5.85018	-1.32378	-0.85564
ENSG00000229484	1.43019	0.000113108	RP5-888M10.2	lincRNA	-1.95276	-3.21208	-0.265775	0.765786	-2.13801	1.5747	0.137643	0.754091	-0.303994	1.56703	-6.30784	-0.0152655	-0.407255	-0.428727	-4.32963	-0.324812	-3.54329	-1.18418	-2.75863	-2.13009	-5.85018	-1.32378	-5.24796
ENSG00000225393	0.746873	0.000114895	RP11-218L14.4	antisense	-0.502094	-2.56	-0.45422	-0.224299	-1.65259	0.579977	-1.51686	-1.5478	-1.79274	0.0316027	-2.6074	-0.74274	-1.35067	-0.327443	-1.52228	-0.829285	-3.05786	-1.30447	-1.70418	1.22475	-0.492631	-0.355493	-2.4406
ENSG00000250033	-1.42076	0.000115329	SLC7A11-AS1	processed_transcript	-5.85965	0.130311	-5.88048	-6.41412	-6.0449	-4.93309	-6.27175	-6.40578	-2.10308	-6.27218	-0.00405936	-6.67348	-3.82872	-6.21009	-5.91459	-6.25555	-2.16478	-5.82803	-2.06675	-5.83053	-5.85018	-5.84735	-1.16049
ENSG00000224216	0.807464	0.000116388	RP13-228J13.1	antisense	-0.574244	-2.56	0.459366	-0.581233	-0.915621	1.59569	-0.294468	0.194132	-0.117581	0.98521	-1.91552	1.22739	-0.0662184	0.265647	-1.66667	0.512635	-2.16478	-0.100114	-2.99964	-0.404267	-0.895987	-0.355493	-1.16049
ENSG00000244625	0.618022	0.000120186	CTA-211A9.5	lincRNA	3.00144	0.55042	3.65673	3.72926	2.23587	4.13926	3.46803	3.23988	3.19704	3.8839	2.31055	3.61539	2.74979	3.57291	2.30941	3.55019	1.12347	2.04848	1.99626	3.63911	2.16663	4.28836	2.99522
ENSG00000224358	1.05669	0.000123254	RP11-466F5.8	antisense	-0.730363	-2.56	-1.1256	-0.224299	-3.23755	-1.1605	-2.57131	-1.5478	-2.22338	-2.02425	-3.98591	-0.52373	-2.38815	-2.12262	-3.10724	-1.73199	-5.86522	-3.02068	-2.21114	-3.02318	-5.85018	-0.561944	-5.24796
ENSG00000243795	1.21506	0.000123774	RP11-572M11.3	lincRNA	-1.61172	-3.69751	0.050253	-0.110343	-3.23755	-0.540776	-0.34101	1.66568	-1.25508	0.496006	-3.50049	0.445464	-0.569985	-0.279349	-3.10724	0.924359	-3.54329	-3.02068	-6.45907	-0.54513	-2.14974	-0.561944	-1.54752
ENSG00000259422	1.24865	0.000125486	RP11-593F23.1	antisense	-2.40021	-6.01944	-0.388631	-1.89056	-6.0449	-2.12574	-2.02382	-0.979516	-4.42501	-1.74862	-3.50049	-2.42555	-3.82872	-4.62512	-5.91459	-2.00762	-5.86522	-5.82803	-3.65171	-1.92364	-5.85018	-0.89315	-5.24796
ENSG00000240012	1.18764	0.000131315	SLC9A9-AS1	antisense	-1.46733	-6.01944	-1.23663	-2.02181	-3.72298	0.168445	-1.31755	-1.36139	-3.0465	-1.87986	-6.30784	-1.24721	-1.42662	-2.3032	-5.91459	-2.16809	-5.86522	-2.1276	-3.65171	-0.049172	-1.94329	-0.421081	-1.78853
ENSG00000229418	0.978223	0.000131855	RP11-35J23.1	antisense	1.39774	-1.62712	2.31427	2.02467	-0.553051	3.03461	0.357609	1.54259	1.9979	2.07212	-0.815987	2.53354	1.45668	1.96484	-0.081705	1.64532	-2.40579	-0.783641	0.907254	1.42686	-0.7209	2.02917	-1.34107
ENSG00000229989	1.2083	0.000133987	MIR181A1HG	lincRNA	3.13188	1.12012	5.3198	4.24141	1.72988	5.34574	3.70982	6.32745	4.98735	4.60357	-0.285472	4.40267	2.05392	4.37582	1.05119	3.22221	2.44312	1.94675	3.19736	6.79495	2.5292	6.70796	1.93195
ENSG00000229403	1.74996	0.000135414	RP4-718N17.2	lincRNA	0.515393	-6.01944	-2.42105	-1.65924	-6.0449	-2.61116	-6.27175	2.92289	-3.57701	-2.81275	-6.30784	-4.35155	-6.63607	-3.40273	-5.91459	0.0843002	-5.86522	0.614909	-0.0840284	-0.215822	-0.492631	0.129934	-3.663
ENSG00000270184	-0.604853	0.000141069	RP11-568J23.5	antisense	1.17378	1.46438	0.386302	-0.305599	1.48648	0.997644	2.26353	1.20155	0.960422	-0.0823535	1.69778	0.403339	1.16483	0.558098	0.826872	-0.0657252	2.22754	1.11448	2.15932	0.677263	2.35439	-1.09246	1.3814
ENSG00000231365	0.59375	0.000141182	RP11-418J17.1	antisense	2.20105	0.355604	2.86435	2.55454	1.54755	2.76966	2.32444	3.62351	2.55456	3.12228	0.911328	2.932	2.44873	2.26969	0.826872	2.2952	0.610516	1.70335	1.35471	2.41264	0.524856	2.71871	2.13575
ENSG00000257221	0.858307	0.000142279	RP11-689B22.2	antisense	1.25929	-3.21208	1.1082	1.39966	0.669342	1.9937	-0.986345	0.832624	-0.117581	0.646685	-2.40095	0.424555	-0.963649	0.949785	-0.705142	0.220184	-2.40579	-0.618581	-0.350543	-0.049172	-0.564781	-0.421081	-0.724396
ENSG00000267852	1.12172	0.000157546	CTB-133G6.2	antisense	-1.46733	-1.77151	-0.152564	-0.741698	-2.87498	-0.587318	-2.57131	-0.475043	-2.35462	-0.490818	-6.30784	-0.0735641	-2.38815	-1.56623	-5.91459	-1.73199	-5.86522	-1.92114	-2.37161	-1.5826	-1.76272	-0.355493	-0.85564
ENSG00000224950	1.16226	0.00015762	RP5-1086K13.1	lincRNA	2.35467	-2.319	4.40145	4.74133	2.64509	4.67239	3.46127	4.56792	4.68717	3.6718	0.231319	5.26132	3.19523	4.70505	0.27523	3.57892	0.821283	1.50288	1.36748	3.56821	1.09233	5.11193	2.72359
ENSG00000236144	0.655623	0.000161868	AD000090.2	antisense	4.0814	2.26134	4.55101	3.96417	3.62575	4.27717	3.793	5.29769	3.60731	4.47013	2.84951	4.4173	3.42867	3.51953	1.8065	3.21002	1.10057	2.75317	3.03878	3.42921	1.4627	4.03682	2.10077
ENSG00000223704	0.800535	0.000162054	RP1-90L6.2	lincRNA	3.98113	0.77498	2.51612	3.76703	1.85596	5.21623	2.95466	4.12463	3.72981	4.64892	1.6637	2.07807	1.76907	3.65255	0.494796	3.3973	1.35395	2.95004	2.97764	4.23421	2.64567	4.23347	3.30279
ENSG00000226202	1.26471	0.000176511	RP11-328D5.1	lincRNA	-3.53772	-6.01944	-2.42105	-0.987859	-1.95744	0.0818574	-2.02382	0.649502	-1.70254	-0.490818	-3.50049	-1.54419	-1.42662	-1.0808	-4.32963	-1.86323	-5.86522	-3.50611	-6.45907	-1.74307	-5.85018	-2.67742	-5.24796
ENSG00000253134	0.954233	0.000179982	CTC-436K13.2	lincRNA	-0.367793	-6.01944	-0.595082	-0.0390839	-1.40105	0.758069	-0.294468	1.51903	-1.46154	1.00395	-1.44986	0.424555	-0.160341	0.558098	-1.82713	0.842482	-1.61729	0.102703	0.0487268	0.612412	-1.45787	0.0833914	-0.724396
ENSG00000250057	0.879684	0.000180637	RP11-576N17.5	lincRNA	-3.05229	-3.69751	-2.71056	-2.50723	-4.45994	-1.8742	-2.81232	-2.01346	-3.28751	-2.18472	-6.30784	-2.42555	-3.17664	-2.3032	-3.59267	-2.55511	-5.86522	-3.50611	-3.65171	-3.5086	-5.85018	-3.03999	-5.24796
ENSG00000250903	0.776576	0.000182529	GMDS-AS1	lincRNA	1.47127	-0.0421558	3.62533	3.52104	1.51734	3.53315	2.53238	1.78898	2.83615	3.10069	0.486576	2.84419	2.37795	2.45169	1.16222	3.53724	-0.0838581	2.03615	1.02475	2.41264	-0.492631	2.63243	1.19499
ENSG00000236088	0.741768	0.000186389	COX10-AS1	processed_transcript	1.91514	0.320414	3.64895	3.65868	1.37295	3.04609	2.37571	3.3935	2.36941	2.81263	-0.158093	3.36132	1.6071	2.40094	0.826872	2.56782	0.324607	0.438752	1.75525	2.4959	0.657611	2.5058	1.64686
ENSG00000245573	0.922229	0.000198763	BDNF-AS	antisense	-1.95276	-3.21208	0.459366	-0.305599	-2.34446	-0.328231	-0.0429288	1.53086	-0.680848	0.716507	-2.84841	-0.0735641	-0.908154	1.0473	-2.21416	0.686965	-3.05786	-0.698752	-0.904479	-1.5826	-2.68026	0.660449	-1.54752
ENSG00000248323	-1.18942	0.000201305	LUCAT1	lincRNA	-0.502094	2.97774	-1.0225	-3.60677	-1.29002	-2.81762	0.62307	-2.70534	-2.35462	-6.27218	-0.635415	-3.21405	-0.296224	-2.75065	-1.66667	-2.34866	0.0174253	-0.698752	-0.392979	-2.13009	-0.564781	-3.03999	1.09189
ENSG00000258748	1.34925	0.000204121	CTD-2223O18.1	antisense	-1.77218	-4.43447	-1.63256	-3.60677	-6.0449	-0.685165	-6.27175	2.62489	-3.57701	-1.06272	-2.6074	-1.91859	-3.46615	0.504159	-3.10724	-0.147025	-2.40579	1.24878	-0.350543	0.00235828	-2.39075	-1.32378	-2.07803
ENSG00000099869	1.19006	0.00020455	IGF2-AS	antisense	0.369172	-1.16145	-0.522932	2.26183	-2.58547	1.2435	2.35396	0.649502	-1.88896	1.37887	-3.50049	1.78185	0.105393	-0.595377	-1.66667	-0.42266	-3.54329	-0.618581	-0.967215	1.20289	-2.14974	0.0833914	-5.24796
ENSG00000230709	-1.43545	0.000210235	AC104024.1	lincRNA	-1.00167	0.609921	-4.29552	-1.28484	1.57715	-3.7107	-0.163223	-6.40578	-1.38939	-2.18472	0.433627	-6.67348	-0.963649	-6.21009	1.24528	-1.50066	-3.05786	0.102703	0.638964	-2.3711	-1.60226	-2.38791	-0.604102
ENSG00000236304	-1.76537	0.000211031	AP001189.4	antisense	3.06219	4.55326	-0.325896	-2.1662	4.34849	-3.7107	2.69115	-1.12038	-0.557113	-0.24981	4.85518	-1.91859	4.14774	4.21513	6.60921	1.60864	4.23676	0.149245	-0.192281	-0.701249	2.28424	-2.67742	2.43152
ENSG00000248309	0.580431	0.00021248	MEF2C-AS1	antisense	1.03517	-0.186546	1.95872	1.69962	0.775275	2.10033	1.3793	2.01628	1.59736	1.95182	-0.52648	2.00248	1.46721	1.94473	0.624564	2.24828	-0.0838581	0.511815	0.483447	1.46409	-0.235473	2.08929	1.09189
ENSG00000260911	0.755329	0.000214388	RP11-196G11.2	lincRNA	-0.730363	-3.21208	0.777727	0.862001	-1.65259	0.55876	0.298108	1.51903	-0.518119	0.203555	-1.55295	-0.696197	-0.52755	0.199305	-2.45516	0.821266	-1.95833	-0.273446	-0.731147	-0.049172	-0.423919	0.419441	-0.85564
ENSG00000247199	1.21268	0.000218644	RP11-373N22.3	antisense	-2.40021	-6.01944	-0.671031	-0.799413	-6.0449	-1.76317	-3.46439	-0.475043	-1.99205	-0.163654	-4.72288	-4.35155	-3.82872	-1.35211	-5.91459	-1.0461	-2.16478	-2.1276	-1.41467	-1.74307	-5.85018	-1.59942	-2.4406
ENSG00000232098	0.804927	0.000220634	CTD-2619J13.14	lincRNA	-1.33608	-3.21208	-1.48817	-0.0390839	-1.29002	-0.328231	-1.62789	-0.0659308	-1.32067	-1.22778	-1.78428	0.545692	-1.27852	-0.852534	-1.15971	1.58365	-3.05786	-0.970054	-2.55218	-1.30697	-2.68026	-0.355493	-2.92603
ENSG00000232680	-1.10518	0.000222554	AC002511.3	lincRNA	-5.85965	-2.56	-5.88048	-4.82916	-2.34446	-3.34813	-0.438857	-6.40578	-2.35462	-1.87986	-2.22038	-6.67348	-1.59168	-3.04016	-4.32963	-3.93362	-2.40579	-5.82803	-2.06675	-3.5086	-2.68026	-3.03999	-2.4406
ENSG00000272377	1.00079	0.000225482	RP11-682N22.1	lincRNA	-3.05229	-3.69751	-1.35692	-0.987859	-6.0449	-1.8742	-6.27175	-0.851192	-0.8162	-1.74862	-3.98591	-0.483652	-2.24376	-1.68652	-3.59267	-2.79612	-3.54329	-2.65811	-3.28914	-1.30697	-3.52826	-0.89315	-2.92603
ENSG00000263072	0.586234	0.00022648	RP11-473M20.14	antisense	1.9921	1.05738	2.62334	3.09565	1.90346	2.90611	2.49974	3.13532	1.96387	3.27664	0.747442	3.30237	1.90696	2.25344	0.980223	2.37016	0.642577	1.18319	2.19557	2.18628	0.559208	2.57472	0.860567
ENSG00000267257	-1.88862	0.000230051	RP11-1151B14.4	antisense	-5.85965	1.16047	-2.42105	-6.41412	0.613307	-3.7107	-4.68678	-6.40578	-6.74694	-6.27218	2.2118	-6.67348	-2.38815	-6.21009	0.107773	-6.25555	0.200871	-5.82803	0.0166656	-3.02318	-5.85018	-5.84735	-2.4406
ENSG00000225234	1.15198	0.000230688	TRAPPC12-AS1	antisense	-2.40021	-2.84951	-0.265775	-0.147337	-2.34446	1.104	-0.163223	1.44597	-1.13223	-0.163654	-3.50049	0.583911	-1.99222	-1.35211	-4.32963	-2.16809	-5.86522	-0.542633	-0.844358	0.100206	-1.60226	-0.89315	-5.24796
ENSG00000255476	0.92659	0.000230741	RP11-1H15.2	antisense	-5.85965	-6.01944	-5.88048	-6.41412	-6.0449	-3.7107	-6.27175	-4.82082	-6.74694	-3.46482	-6.30784	-3.86612	-6.63607	-3.40273	-5.91459	-3.44819	-5.86522	-2.1276	-6.45907	-2.66061	-5.85018	-5.84735	-5.24796
ENSG00000272622	1.13679	0.000237792	RP11-395N3.2	lincRNA	-1.77218	-3.69751	-1.79302	-2.02181	-2.34446	-1.56386	-2.81232	-2.49889	-6.74694	-2.18472	-6.30784	-5.08851	-6.63607	-3.40273	-5.91459	-2.16809	-5.86522	-1.07315	-2.21114	-1.92364	-3.04283	-2.14691	-5.24796
ENSG00000245904	0.724871	0.000264825	RP11-796E2.4	antisense	1.08287	1.27519	1.48584	2.3441	1.17426	2.45061	2.01827	1.04543	1.00126	2.98285	-0.285472	2.45323	1.62602	2.29374	0.624564	2.97567	-0.438953	0.614909	0.335348	2.74312	-0.0688235	2.2664	-0.724396
ENSG00000250685	-1.3689	0.000268987	RP11-486L19.2	antisense	-0.0267564	-1.06524	-3.55856	-1.89056	-0.212014	-6.51806	-2.57131	-2.31832	-1.61765	-6.27218	-0.00405936	-5.08851	-3.82872	-6.21009	-2.45516	-6.25555	-1.95833	-5.82803	-1.60109	-1.74307	0.489667	-5.84735	-2.07803
ENSG00000262098	1.15154	0.000272375	CTD-2561B21.10	lincRNA	-2.15921	-6.01944	-0.325896	-0.987859	-3.72298	-0.790135	-0.845483	-0.215956	-2.35462	-2.81275	-6.30784	-2.28116	-1.88119	-2.12262	-5.91459	-1.73199	-2.16478	-3.02068	-3.65171	-2.3711	-5.85018	-1.59942	-5.24796
ENSG00000234423	1.00993	0.0002759	AC019118.2	lincRNA	-2.15921	-6.01944	-2.42105	-2.50723	-2.58547	-2.12574	-2.18428	-4.08385	-6.74694	-1.1429	-3.98591	-1.8155	-4.31415	-3.40273	-3.59267	-2.55511	-5.86522	-1.07315	-2.55218	-0.876335	-3.52826	-2.38791	-5.24796
ENSG00000234880	-1.34847	0.000281599	LINC00163	lincRNA	-3.05229	-2.319	-2.42105	-6.41412	-1.00051	-3.7107	-1.14246	-6.40578	-0.337546	-3.46482	-0.158093	-1.18162	0.781779	-1.68652	0.352192	-3.44819	-0.579816	-5.82803	-3.65171	-2.3711	0.0805541	-5.84735	-5.24796
ENSG00000223855	0.704369	0.000284883	AC147651.3	lincRNA	0.0229967	-2.319	0.459366	0.683909	0.258877	0.812861	-1.74819	-0.0659308	-2.35462	-0.206089	-1.44986	0.564928	-0.854714	1.62912	-0.705142	-0.147025	-0.735935	-0.40177	-0.0496769	1.28841	-0.492631	1.14134	0.68278
ENSG00000252690	-0.670584	0.000286045	SCARNA15	processed_transcript	-0.244937	0.00293207	-1.1256	-2.95469	0.39804	-2.12574	-0.657038	-2.15785	-1.01902	-2.36529	0.0320099	-1.38807	-0.486327	-0.187719	-0.48833	-1.86323	-0.911021	-1.92114	0.817057	-1.5826	-0.492631	-1.45503	-0.49307
ENSG00000249684	0.775187	0.000288354	RP11-423H2.3	antisense	-0.433382	-1.93197	1.48584	-0.264376	-1.79698	1.133	0.171196	1.75913	-0.371898	1.56703	-0.285472	0.545692	-0.128279	1.20777	-0.870201	1.71599	-2.40579	0.238054	-0.786643	-1.30697	-0.992202	0.342479	-0.49307
ENSG00000267612	1.10604	0.000296746	CTD-3116E22.7	lincRNA	-5.85965	-6.01944	-1.97359	-1.77027	-3.23755	-3.05862	-2.57131	-2.49889	-6.74694	-2.18472	-3.98591	-2.58601	-4.31415	-2.50965	-5.91459	-1.21116	-5.86522	-5.82803	-6.45907	-2.66061	-5.85018	-2.67742	-5.24796
ENSG00000224100	0.880166	0.000303505	AP001630.5	antisense	-2.68972	-6.01944	-3.07313	-4.0922	-6.0449	-3.7107	-6.27175	-2.70534	-6.74694	-6.27218	-6.30784	-3.86612	-4.31415	-6.21009	-5.91459	-3.93362	-5.86522	-5.82803	-6.45907	-3.02318	-5.85018	-4.26238	-5.24796
ENSG00000266283	-1.16055	0.000321375	RP11-627G18.1	antisense	-5.85965	-6.01944	-5.88048	-6.41412	-6.0449	-6.51806	-2.36486	-6.40578	-6.74694	-6.27218	-3.13792	-6.67348	-3.82872	-6.21009	-5.91459	-6.25555	-3.54329	-5.82803	0.853815	-5.83053	-2.68026	-5.84735	-2.92603
ENSG00000244063	0.893322	0.00032673	AC024704.2	lincRNA	-4.27468	-6.01944	-4.29552	-2.71368	-6.0449	-4.19613	-6.27175	-3.59843	-5.16197	-2.81275	-6.30784	-3.21405	-6.63607	-4.62512	-5.91459	-3.93362	-5.86522	-5.82803	-3.65171	-5.83053	-5.85018	-1.94046	-5.24796
ENSG00000225806	1.27449	0.000326954	RP1-309F20.3	processed_transcript	0.162721	-2.11255	-1.79302	-2.71368	-6.0449	-3.34813	-0.779894	-0.851192	-1.38939	-0.544258	-3.13792	-0.483652	-6.63607	-2.3032	-2.74467	-0.42266	-5.86522	-2.65811	-4.87411	-2.66061	-5.85018	-0.802952	-5.24796
ENSG00000266963	0.973473	0.000329364	AC005625.1	antisense	-1.95276	-6.01944	-1.79302	-1.45993	-6.0449	-2.12574	-3.46439	-1.88222	-3.28751	-2.57174	-3.13792	-3.86612	-3.82872	-2.50965	-5.91459	-1.86323	-5.86522	-2.65811	-4.13714	-2.3711	-1.94329	-1.59942	-2.4406
ENSG00000233665	0.770085	0.000333019	RP11-523O18.5	antisense	-0.0782867	0.00293207	1.25907	2.15193	-0.430194	2.51812	2.72543	3.50261	1.12958	2.66151	0.0671993	1.66191	1.19047	2.16929	-0.557043	2.12383	-1.00724	1.04233	0.596215	2.46868	0.215906	1.66835	0.366752
ENSG00000205913	0.67537	0.000335555	SRRM2-AS1	antisense	1.65605	-0.34701	1.3769	1.63573	0.524952	2.29893	1.27515	2.78157	1.43794	1.92258	-0.158093	0.842223	0.397349	1.27373	-1.52228	2.00655	-0.0323278	-0.100114	0.907254	1.28841	-0.895987	1.83213	0.634685
ENSG00000231595	0.753312	0.000337151	AC005224.2	antisense	-0.650193	-3.69751	-0.751201	0.272377	-1.00051	-0.251269	-0.24938	0.164075	0.123427	0.327735	-2.6074	0.221341	-0.908154	-0.0603393	-3.10724	0.373807	-1.77775	-1.30447	-2.37161	-0.275943	-0.992202	0.456435	-1.34107
ENSG00000257222	0.935211	0.00033926	RP11-554E23.4	antisense	-1.95276	-2.56	-2.42105	-2.02181	-4.45994	-1.1605	-6.27175	-2.31832	-1.79274	-1.74862	-3.50049	-0.483652	-2.54861	-2.50965	-3.10724	-2.34866	-5.86522	-2.65811	-2.75863	-1.5826	-3.04283	-1.75988	-5.24796
ENSG00000273032	-1.54567	0.000339637	DGCR9	lincRNA	-5.85965	1.18024	-5.88048	-6.41412	-0.553051	-6.51806	-6.27175	-6.40578	-6.74694	-6.27218	-1.44986	-6.67348	-0.19313	-6.21009	-2.21416	-6.25555	-5.86522	-5.82803	-6.45907	-5.83053	0.299564	-5.84735	-5.24796
ENSG00000227155	0.789874	0.000341872	RP11-165F24.3	antisense	1.43497	1.46438	4.51933	3.34909	1.13501	3.04228	2.55162	2.256	2.00461	4.18212	1.22354	3.15783	3.46327	4.12419	0.624564	2.6423	0.284529	3.57498	2.3321	3.2806	-0.564781	2.59145	2.32947
ENSG00000261879	0.75406	0.000343432	RP11-333E1.1	antisense	0.960533	-2.319	1.78485	1.79045	0.92088	2.1579	1.33558	1.32893	1.53383	1.86225	-0.950288	2.07807	0.941355	1.60369	0.655261	1.03907	-2.40579	0.400784	-0.0840284	1.70085	0.416603	1.77471	-0.0385044
ENSG00000233303	0.833328	0.00034374	XXYLT1-AS1	antisense	-4.27468	-6.01944	-3.07313	-3.60677	-6.0449	-2.61116	-3.94982	-4.08385	-6.74694	-3.10225	-6.30784	-4.35155	-5.05111	-3.04016	-4.32963	-4.67059	-5.86522	-5.82803	-4.13714	-3.5086	-5.85018	-2.67742	-5.24796
ENSG00000236734	0.939261	0.000344897	GRIFIN	processed_transcript	-2.68972	-6.01944	-1.35692	-2.1662	-3.72298	-1.09179	-2.81232	-1.88222	-3.93958	-1.22778	-3.98591	-4.35155	-2.24376	-1.4552	-3.59267	-2.00762	-5.86522	-3.02068	-3.65171	-2.13009	-2.68026	-1.75988	-5.24796
ENSG00000261254	-1.8371	0.000347589	RP4-714D9.5	sense_overlapping	-5.85965	-6.01944	-5.88048	-6.41412	-0.263544	-6.51806	-6.27175	-6.40578	-0.518119	-6.27218	0.231319	-6.67348	0.440742	-6.21009	0.0161423	-6.25555	-0.373365	-0.873838	-0.309321	-0.876335	0.995307	-0.232636	-0.389977
ENSG00000235706	0.609732	0.000352262	DICER1-AS1	antisense	1.83384	0.423508	3.46159	3.45161	1.84384	2.5236	2.50633	3.25064	2.8915	2.78039	1.09304	3.33635	2.59994	2.63854	1.38003	3.16441	0.401569	1.71886	1.60163	2.38379	0.127097	2.53203	1.62241
ENSG00000203327	0.777733	0.000359763	AC012358.7	antisense	-0.305058	-3.21208	-0.325896	0.0288202	-0.263544	0.424459	-0.914195	-0.523138	-1.38939	-0.206089	-1.55295	-0.52373	-0.803184	-0.279349	-3.10724	-0.324812	-1.77775	-0.542633	-0.844358	-0.102611	-2.14974	-0.989365	-5.24796
ENSG00000225230	-0.790649	0.000361767	AC008937.3	antisense	-2.15921	-1.77151	-3.07313	-3.60677	-1.00051	-2.27013	-0.438857	-4.08385	-1.25508	-1.87986	-1.02244	-3.21405	-1.88119	-1.68652	-0.705142	-2.34866	-1.34166	-5.82803	-2.75863	-2.66061	-0.895987	-3.03999	-2.4406
ENSG00000248866	0.949596	0.000364575	USP46-AS1	lincRNA	0.549745	-6.01944	1.5204	1.13277	-0.316984	0.899797	-0.389104	0.671035	0.704274	1.02244	-0.950288	0.826369	-0.296224	0.504159	-1.27074	0.430951	-1.95833	-1.07315	-1.81521	0.398287	-1.94329	-0.174921	-1.00003
ENSG00000225839	0.764251	0.000367978	TRMT2B-AS1	sense_overlapping	-5.85965	-6.01944	-4.29552	-4.0922	-6.0449	-4.19613	-6.27175	-3.23586	-5.16197	-3.95025	-6.30784	-3.50355	-5.05111	-3.88816	-5.91459	-3.44819	-5.86522	-5.82803	-4.13714	-2.66061	-5.85018	-4.26238	-5.24796
ENSG00000236095	1.08776	0.000374348	RP11-49O14.2	sense_intronic	-1.33608	-4.43447	-0.595082	-1.77027	-2.58547	-0.84563	-1.31755	-0.138994	-3.57701	-0.544258	-3.50049	-0.651109	-2.11251	-1.25589	-5.91459	0.153841	-5.86522	-3.02068	-0.481788	-1.30697	-4.26522	-1.45503	-1.54752
ENSG00000236494	1.12346	0.000388084	RP11-89N17.4	lincRNA	-3.05229	-6.01944	-3.07313	-2.32666	-6.0449	-1.76317	-2.02382	-1.5478	-6.74694	-3.10225	-6.30784	-3.50355	-2.93563	-3.40273	-5.91459	-1.50066	-5.86522	-5.82803	-6.45907	-5.83053	-5.85018	-3.03999	-5.24796
ENSG00000229431	-0.602531	0.00039489	RP1-92O14.6	antisense	-0.502094	-0.0886984	-1.63256	-1.45993	-0.263544	-1.3086	-1.41377	-0.572891	-0.147025	-1.87986	0.0320099	-1.46402	-0.613706	-1.25589	0.853589	-2.34866	0.0174253	-2.3686	0.309116	-1.18668	0.172185	-0.561944	-0.724396
ENSG00000262222	0.596835	0.000396129	RP11-876N24.4	antisense	4.54017	2.85401	5.11175	5.30826	4.44193	5.92825	4.10655	7.2672	5.86892	5.35125	3.4882	5.43341	4.95872	5.26006	3.75252	5.24778	2.67781	5.26274	5.17256	5.04522	4.24389	5.35049	4.92572
ENSG00000233222	0.847507	0.000396256	RP11-216N14.9	antisense	-4.27468	-6.01944	-3.07313	-3.2442	-6.0449	-2.61116	-4.68678	-4.08385	-3.28751	-3.46482	-6.30784	-5.08851	-3.17664	-3.04016	-5.91459	-4.67059	-5.86522	-3.50611	-6.45907	-3.5086	-5.85018	-3.52542	-5.24796
ENSG00000236908	-1.46849	0.000398168	RP5-1063M23.2	lincRNA	-5.85965	-6.01944	-5.88048	-6.41412	-1.95744	-4.19613	-3.46439	-6.40578	-6.74694	-6.27218	-0.753251	-6.67348	-6.63607	-3.40273	-0.0319519	-6.25555	0.929198	-5.82803	-2.37161	-5.83053	-3.04283	-5.84735	0.306631
ENSG00000239775	1.2766	0.000400331	AC017116.11	sense_overlapping	1.05922	-0.527583	2.50753	2.58306	-0.835451	2.09297	-0.163223	1.80854	1.52453	1.59201	1.29949	2.60961	0.831532	1.96484	0.0626849	2.44835	-5.86522	1.13775	1.14826	1.98325	-5.85018	2.69569	1.95171
ENSG00000235117	1.26785	0.000402135	RP11-229P13.20	lincRNA	0.162721	-2.319	3.20432	3.09169	-0.553051	1.46494	-0.00496091	3.13532	1.11725	2.14145	-4.72288	1.58862	0.956383	2.80393	0.193929	1.54535	-2.16478	-2.1276	-0.576425	0.277993	-3.04283	0.381473	-1.00003
ENSG00000259772	1.01234	0.000407424	RP11-16E12.2	lincRNA	-2.15921	-2.56	-0.388631	0.272377	-3.23755	-0.84563	-1.41377	-1.2765	-2.65947	0.297678	-2.40095	-0.40669	-2.54861	0.504159	-2.45516	-1.61169	-5.86522	-3.02068	-1.50487	-2.13009	-5.85018	-1.45503	-2.92603
ENSG00000265139	0.854985	0.00041693	RP11-227G15.2	lincRNA	-3.05229	-3.69751	-2.42105	-2.02181	-2.34446	-3.7107	-2.81232	-0.733355	-3.28751	-2.02425	-3.13792	-1.71928	-3.46615	-2.75065	-5.91459	-2.55511	-5.86522	-2.65811	-4.87411	-2.13009	-4.26522	-3.03999	-5.24796
ENSG00000268392	0.932709	0.000419226	AC003682.16	lincRNA	-2.68972	-4.43447	-1.23663	-0.264376	-2.13801	-0.903346	-1.74819	-2.31832	-2.22338	-0.122431	-2.22038	-1.46402	-3.17664	-2.75065	-5.91459	-1.50066	-1.61729	-1.92114	-4.13714	-0.701249	-4.26522	-2.38791	-5.24796
ENSG00000272489	-1.63175	0.000427554	RP11-182L21.5	sense_intronic	-5.85965	-1.49587	-5.88048	-6.41412	-1.00051	-6.51806	-0.24938	-6.40578	-0.59719	-6.27218	-1.78428	-6.67348	-0.705337	-1.0808	-3.10724	-6.25555	-5.86522	-1.07315	-6.45907	-5.83053	0.0324598	-5.84735	-1.34107
ENSG00000227885	1.10962	0.000429242	RP11-79N23.1	lincRNA	-3.05229	-6.01944	-2.42105	-2.32666	-6.0449	-1.66007	-1.41377	-1.76192	-6.74694	-2.18472	-3.50049	-2.42555	-2.93563	-1.81777	-4.32963	-2.79612	-5.86522	-5.82803	-3.28914	-2.13009	-5.85018	-1.32378	-5.24796
ENSG00000235121	1.07072	0.000438345	RP11-90L20.2	antisense	-0.730363	-6.01944	-2.18004	-2.71368	-1.95744	-0.635412	-2.36486	-1.19633	-2.10308	-0.986776	-6.30784	-0.607388	-1.02136	-2.3032	-2.21416	-2.16809	-3.54329	-1.92114	-3.65171	-1.43821	-5.85018	-1.75988	-5.24796
ENSG00000272631	-1.03006	0.000443542	RP11-359E3.4	antisense	-5.85965	-1.93197	-5.88048	-6.41412	-6.0449	-6.51806	-3.46439	-6.40578	-1.46154	-6.27218	-6.30784	-6.67348	-3.17664	-6.21009	-5.91459	-6.25555	-5.86522	-5.82803	-3.65171	-5.83053	-5.85018	-5.84735	-1.54752
ENSG00000247595	0.749431	0.000447224	SPTY2D1-AS1	processed_transcript	1.23839	0.209383	2.43693	2.58306	0.800586	2.56143	1.3503	2.96708	-0.638413	3.10936	0.968284	0.0947074	0.712654	1.17362	-0.081705	0.821266	1.35395	1.57284	0.941812	3.15531	-0.64073	1.63647	-0.389977
ENSG00000250976	-0.861003	0.000462147	RP11-94C24.11	antisense	-5.85965	-6.01944	-5.88048	-6.41412	-3.23755	-6.51806	-3.46439	-6.40578	-4.42501	-6.27218	-4.72288	-6.67348	-5.05111	-6.21009	-5.91459	-6.25555	-2.69529	-5.82803	-6.45907	-5.83053	-1.76272	-5.84735	-5.24796
ENSG00000268001	-0.900016	0.000488717	CTC-241F20.3	antisense	3.02605	3.49034	0.748872	2.01633	3.98438	2.08557	1.66489	0.00361017	2.27265	2.09851	4.07478	3.80529	3.06263	2.28577	4.84446	1.43794	4.1192	-2.3686	3.4583	1.22475	2.94098	1.07152	2.62856
ENSG00000260907	1.15922	0.000488761	AC008088.4	lincRNA	-5.85965	-6.01944	-3.55856	-1.89056	-6.0449	-1.38877	-6.27175	-2.01346	-6.74694	-1.51729	-2.6074	-2.58601	-6.63607	-3.40273	-5.91459	-3.44819	-3.05786	-5.82803	-6.45907	-2.3711	-5.85018	-2.14691	-2.92603
ENSG00000267707	1.14902	0.000490198	RP11-95O2.5	antisense	-1.77218	-6.01944	-0.926288	-0.581233	-1.18692	-0.409531	0.0681026	0.0371627	-1.99205	-0.439288	-2.84841	-1.00105	-2.11251	-1.35211	-5.91459	-1.21116	-5.86522	-3.50611	-2.55218	-0.876335	-5.85018	-1.20349	-2.92603
ENSG00000267568	0.623696	0.000500754	RP11-87G24.3	processed_transcript	1.79141	-0.238076	1.48584	2.26887	0.524952	3.37525	1.66489	2.77164	2.01129	1.52872	0.930565	1.73166	0.781779	0.635404	-0.870201	1.32188	-0.579816	1.53829	0.700803	2.18628	1.1385	2.57472	1.43854
ENSG00000236031	1.17358	0.000501478	RP11-269F20.1	antisense	-2.40021	-1.26455	-1.79302	-0.686203	-6.0449	-0.368308	-0.845483	-0.67786	-2.10308	-1.1429	-6.30784	-1.24721	-2.54861	-1.0808	-5.91459	-1.61169	-3.54329	-3.02068	-1.93551	-0.876335	-5.85018	-3.03999	-5.24796
ENSG00000249898	0.612429	0.000507546	CTD-2541M15.1	antisense	-0.305058	-1.49587	0.050253	0.300122	-1.18692	0.621496	0.522668	0.925136	0.0474784	0.670336	-2.05991	-0.0441203	-0.00671736	-0.0202618	-2.0077	0.402662	-0.911021	-0.970054	-1.93551	0.235557	-1.0953	0.810866	-1.00003
ENSG00000243733	0.94521	0.000511386	RP11-80H8.3	lincRNA	-1.77218	-6.01944	-3.55856	-4.0922	-6.0449	-1.99449	-6.27175	-2.15785	-4.42501	-2.81275	-6.30784	-2.97304	-3.46615	-3.40273	-3.10724	-3.93362	-2.69529	-3.02068	-6.45907	-3.02318	-3.52826	-3.03999	-5.24796
ENSG00000270571	1.22222	0.000514732	RP11-355F16.1	antisense	-3.05229	-6.01944	-1.23663	-1.28484	-3.23755	-1.1605	-0.389104	-0.733355	-3.0465	-2.18472	-6.30784	-1.54419	-3.82872	-1.96216	-5.91459	-0.47419	-5.86522	-5.82803	-2.75863	-3.02318	-5.85018	-1.75988	-5.24796
ENSG00000251523	0.857663	0.000543461	RP11-724M22.1	antisense	-4.27468	-6.01944	-2.71056	-4.0922	-6.0449	-2.81762	-6.27175	-6.40578	-6.74694	-3.95025	-4.72288	-5.08851	-6.63607	-6.21009	-5.91459	-6.25555	-5.86522	-3.02068	-6.45907	-3.5086	-5.85018	-2.67742	-5.24796
ENSG00000262952	-1.02089	0.00055282	AC139099.6	lincRNA	-2.15921	-2.56	-5.88048	-6.41412	-3.23755	-4.93309	-4.68678	-3.59843	-4.42501	-4.68722	-3.50049	-6.67348	-2.93563	-4.62512	-2.21416	-4.67059	-1.00724	-5.82803	-4.87411	-5.83053	-0.805789	-5.84735	-2.92603
ENSG00000272752	0.663821	0.000555269	STAG3L5P-PVRIG2P-PILRB	processed_transcript	5.31715	3.27748	5.06715	6.74528	4.76808	6.08255	4.23506	6.0803	6.34235	5.91857	3.20193	6.4897	5.88724	6.13504	4.90319	5.81558	3.03263	4.62832	4.18569	4.45371	4.36292	4.78656	2.8967
ENSG00000255920	0.827059	0.000579833	CCND2-AS2	antisense	-1.95276	-3.69751	-1.35692	-0.92227	-2.34446	-0.368308	-1.31755	-0.733355	-2.35462	-0.986776	-4.72288	-2.02962	-1.27852	-1.56623	-3.10724	-1.12627	-4.28026	-3.02068	-3.65171	-2.13009	-2.68026	-1.94046	-5.24796
ENSG00000272748	-0.915692	0.000585275	RP11-222G7.2	lincRNA	-3.53772	-3.21208	-5.88048	-6.41412	-2.34446	-6.51806	-3.46439	-6.40578	-3.93958	-6.27218	-3.50049	-6.67348	-2.38815	-6.21009	-5.91459	-6.25555	-5.86522	-5.82803	-6.45907	-5.83053	-3.04283	-5.84735	-5.24796
ENSG00000237489	0.704421	0.00058623	LINC00959	lincRNA	-1.77218	-1.93197	0.62731	0.300122	-0.687352	1.55341	0.103292	0.754091	0.799957	0.887693	-1.17856	1.8618	-0.486327	0.660278	-1.15971	0.220184	-1.34166	-0.336182	-0.481788	0.963884	-1.76272	0.839155	-1.54752
ENSG00000269051	0.92264	0.00058867	CTD-2245F17.3	lincRNA	-1.46733	-6.01944	-1.48817	0.0288202	-1.79698	0.0211034	-1.87943	-0.67786	-0.864294	-0.24981	-3.13792	-0.230533	-1.50679	-1.68652	-2.21416	-1.73199	-3.05786	-1.92114	-3.28914	-2.3711	-2.39075	-0.421081	-5.24796
ENSG00000232995	0.846196	0.000610861	RP11-267N12.3	antisense	-0.244937	-1.26455	1.41414	1.86665	0.555009	0.848267	0.137643	1.14111	1.15393	1.60434	-1.66398	1.25134	0.712654	0.0567002	-0.24217	1.92933	-3.05786	-0.698752	-1.81521	0.82768	-2.68026	1.80371	0.0374445
ENSG00000267040	0.657218	0.000611649	RP11-35G9.3	antisense	1.81983	0.284345	2.74522	3.81349	2.63809	3.53043	2.65009	3.53527	3.41923	3.58425	1.67515	4.34958	2.98047	4.17254	2.60504	3.09096	1.0773	2.15496	2.37698	3.39588	0.0324598	3.73197	2.35937
ENSG00000232211	0.863191	0.000613599	RP11-395D3.1	lincRNA	-5.85965	-6.01944	-5.88048	-6.41412	-6.0449	-2.61116	-6.27175	-6.40578	-6.74694	-3.10225	-6.30784	-5.08851	-6.63607	-2.50965	-5.91459	-2.34866	-5.86522	-4.24307	-6.45907	-4.24557	-5.85018	-4.26238	-5.24796
ENSG00000269054	0.841678	0.000614603	CTD-2619J13.3	antisense	-0.244937	-6.01944	-0.671031	-1.45993	-1.18692	-0.0751119	0.137643	-0.339692	-1.13223	-0.0433594	-2.22038	-0.40669	-2.38815	0.0567002	-3.10724	-0.829285	-2.16478	-0.0466751	-1.0328	0.235557	-2.14974	-0.355493	-1.34107
ENSG00000233895	0.639235	0.000614796	RP1-122P22.2	lincRNA	-0.367793	-3.21208	-0.926288	0.380293	-1.79698	0.250129	-0.294468	-0.383413	-1.07451	0.102861	-2.6074	-1.00105	-1.77809	-1.25589	-2.21416	-0.147025	-2.69529	-0.873838	-1.24961	-0.404267	-1.32662	-1.32378	-1.16049
ENSG00000270015	2.5812	0.000684777	RP11-540B6.6	sense_intronic	1.73281	-6.01944	-5.88048	1.20793	-1.52134	3.50014	3.28092	4.92121	2.25024	4.90462	-6.30784	3.23191	1.04341	1.5647	-5.91459	4.39281	-5.86522	1.73421	-6.45907	4.15104	-5.85018	3.52552	3.28732
ENSG00000249456	-0.936688	0.000692148	RP11-298J20.4	sense_overlapping	3.16549	2.59159	-0.208059	-1.05657	2.71332	1.30849	2.20803	-3.59843	0.736878	0.573312	3.56098	0.486394	1.26479	1.71473	3.75252	1.32188	3.4317	2.52511	2.47462	0.910935	2.36414	-0.489794	1.59753
ENSG00000230631	-1.27646	0.000694488	RP11-359N11.1	lincRNA	-0.815252	-0.136793	-4.29552	-6.41412	-1.95744	-6.51806	-3.46439	-6.40578	-6.74694	-6.27218	-1.02244	-6.67348	-2.93563	-3.04016	-1.52228	-6.25555	-0.655764	-3.50611	-2.06675	-4.24557	-2.14974	-5.84735	-3.663
ENSG00000249825	0.624496	0.000697975	CTD-2201I18.1	antisense	0.206443	-1.16145	1.63522	0.824281	-1.09071	1.1893	-0.914195	0.439709	1.70015	0.496006	-1.78428	1.46095	0.815137	1.13864	-0.629193	-0.105803	-0.820824	0.581356	-0.481788	0.739324	-0.64073	1.42878	-0.0385044
ENSG00000223685	0.936831	0.000710585	LINC00571	lincRNA	-5.85965	-6.01944	-3.55856	-2.95469	-3.23755	-1.0262	-6.27175	-3.59843	-4.42501	-2.02425	-6.30784	-2.97304	-3.17664	-1.96216	-4.32963	-2.55511	-5.86522	-3.50611	-4.87411	-2.3711	-3.04283	-3.03999	-5.24796
ENSG00000188338	-1.96113	0.000714344	SLC38A3	processed_transcript	-1.61172	4.48141	-3.55856	-6.41412	2.99127	-2.27013	1.05917	-4.08385	-2.49901	-1.74862	3.84571	-3.86612	-1.50679	-3.40273	-3.59267	-0.970148	6.43313	-2.1276	-0.731147	-0.972551	0.0805541	-5.84735	-0.604102
ENSG00000224533	0.609858	0.00071751	TMLHE-AS1	antisense	-0.367793	-1.77151	-0.45422	0.354061	-0.915621	1.35846	-0.845483	-0.256034	-0.557113	0.327735	-2.40095	1.17827	-0.753431	-0.655498	-1.15971	-0.233182	-1.95833	-0.783641	-0.481788	0.00235828	-0.423919	-0.561944	-2.07803
ENSG00000253649	0.95784	0.000719414	PRSS51	antisense	0.798565	-6.01944	0.595249	2.93682	0.72328	1.6266	0.548432	0.995099	0.736878	1.77767	-1.17856	0.744376	0.0504265	0.297708	-2.0077	0.402662	-1.11033	0.28049	-1.17367	0.544508	-0.64073	0.342479	-0.724396
ENSG00000226686	1.04594	0.000744326	AC012309.5	lincRNA	-0.244937	-4.43447	0.965006	-0.483386	-4.45994	0.0818574	-0.438857	-0.851192	-1.79274	-0.163654	-1.35364	0.506432	-0.261035	-2.75065	-3.10724	0.821266	-4.28026	0.36179	0.411297	0.0521113	-1.76272	-0.989365	-5.24796
ENSG00000250490	0.759034	0.000763033	CTD-2324F15.2	lincRNA	-1.33608	-1.77151	-1.0225	0.6193	-1.52134	-0.587318	-0.294468	0.489037	-3.0465	1.24352	-2.05991	-0.696197	-1.50679	-0.0603393	-3.10724	-0.583124	-2.16478	-1.30447	-0.119218	-0.972551	-3.04283	0.527693	-1.16049
ENSG00000226738	-0.751917	0.000776354	CTA-384D8.31	antisense	-5.85965	-3.69751	-5.88048	-6.41412	-4.45994	-6.51806	-3.46439	-6.40578	-5.16197	-6.27218	-3.98591	-6.67348	-5.05111	-3.88816	-3.59267	-4.67059	-5.86522	-5.82803	-3.65171	-5.83053	-5.85018	-5.84735	-2.92603
ENSG00000228784	0.624927	0.000793068	LINC00954	lincRNA	2.80924	0.899427	1.5204	4.50697	2.36872	3.67793	2.43216	3.3033	1.87877	4.02817	1.94483	1.67082	0.831532	2.91145	1.75074	2.82394	1.31469	2.23266	2.35792	4.44443	3.19148	3.65449	2.20325
ENSG00000262152	-1.05997	0.000793492	LINC00514	lincRNA	-3.05229	-3.69751	-3.07313	-6.41412	-6.0449	-6.51806	-2.02382	-6.40578	-2.22338	-6.27218	-4.72288	-6.67348	-2.93563	-6.21009	-2.21416	-6.25555	-3.05786	-3.50611	-2.21114	-5.83053	-5.85018	-5.84735	-2.4406
ENSG00000270159	-0.824787	0.000794321	RP11-568J23.6	antisense	-0.502094	-0.464847	-0.751201	-2.71368	-0.316984	-2.12574	0.805068	-1.2765	-1.88896	-2.02425	-0.00405936	-5.08851	-0.332293	-2.3032	-0.299885	-2.34866	0.112062	0.102703	0.110788	-0.215822	-0.235473	-2.67742	-0.0385044
ENSG00000144596	-1.13704	0.000799519	GRIP2	processed_transcript	-5.85965	-2.11255	-4.29552	-4.0922	-2.34446	-6.51806	-3.46439	-6.40578	-3.93958	-1.74862	-1.78428	-3.86612	-2.93563	-6.21009	-2.45516	-6.25555	-0.373365	-5.82803	-6.45907	-5.83053	-0.7209	-3.03999	-2.92603
ENSG00000225263	1.1544	0.000799906	PCDH9-AS3	antisense	-5.85965	-6.01944	-5.88048	-1.28484	-3.23755	-0.587318	-1.87943	-1.36139	-5.16197	-0.986776	-6.30784	-1.91859	-5.05111	-2.50965	-5.91459	-2.79612	-5.86522	-5.82803	-4.87411	-3.02318	-5.85018	-1.94046	-5.24796
ENSG00000229327	0.638493	0.000850186	RP11-135A24.2	antisense	-0.0782867	-1.77151	0.269263	-1.05657	-1.40105	-1.66007	-1.41377	-1.45158	-2.49901	-0.544258	-3.13792	-1.54419	-1.42662	-1.4552	-2.74467	-2.00762	-3.54329	-1.07315	-2.75863	-0.47298	-3.04283	-1.45503	-2.4406
ENSG00000266708	-0.646705	0.000853276	RP11-661O13.1	antisense	0.444134	1.79435	-0.83609	-1.28484	0.749512	-0.495688	0.442498	-0.428501	-1.32067	-0.914626	0.350371	0.120939	0.105393	-0.655498	1.09663	-0.897998	0.902967	-0.273446	1.70584	-0.404267	1.58444	-2.38791	-0.118675
ENSG00000232855	0.869864	0.000872741	AF131217.1	lincRNA	-2.40021	-3.69751	-3.07313	-1.12872	-6.0449	-3.7107	-2.57131	-1.76192	-2.65947	-2.81275	-3.98591	-2.76659	-5.05111	-1.35211	-5.91459	-2.00762	-3.54329	-3.02068	-3.65171	-3.02318	-5.85018	-1.75988	-2.4406
ENSG00000231951	-0.951659	0.000883047	AC004837.4	antisense	-5.85965	-6.01944	-5.88048	-6.41412	-1.18692	-6.51806	-2.02382	-6.40578	-3.93958	-6.27218	-2.05991	-6.67348	-5.05111	-6.21009	-3.10724	-6.25555	-5.86522	-5.82803	-6.45907	-5.83053	-5.85018	-5.84735	-5.24796
ENSG00000234062	0.647848	0.00089994	RP11-308D16.4	processed_transcript	2.00454	-1.77151	2.83719	2.23334	1.756	2.15083	2.51942	2.75661	1.39772	2.28624	1.86709	2.6462	1.82745	2.52123	0.151494	1.97807	-0.310629	0.966381	0.596215	2.04599	0.127097	1.37182	0.818131
ENSG00000230489	0.772233	0.000915205	VAV3-AS1	antisense	-1.61172	-4.43447	-3.07313	-0.632764	-1.00051	-1.1605	-2.81232	-1.65089	-1.46154	-1.31798	-3.98591	-1.24721	-3.17664	-1.56623	-4.32963	-1.50066	-3.54329	-1.07315	-4.13714	-2.3711	-3.52826	-0.89315	-0.85564
ENSG00000258913	1.15337	0.000917397	RP11-260M19.2	lincRNA	-5.85965	-6.01944	-2.42105	-4.0922	-2.87498	-1.38877	-3.46439	-2.49889	-6.74694	-1.51729	-6.30784	-3.86612	-6.63607	-6.21009	-5.91459	-6.25555	-5.86522	-2.3686	-6.45907	-2.13009	-5.85018	-0.355493	-5.24796
ENSG00000258810	0.883447	0.00092404	RP11-219E7.1	antisense	-4.27468	-4.43447	-3.07313	-2.50723	-4.45994	-3.34813	-6.27175	-2.94635	-3.28751	-3.95025	-6.30784	-2.42555	-6.63607	-3.04016	-5.91459	-2.79612	-5.86522	-5.82803	-3.65171	-4.24557	-5.85018	-1.75988	-3.663
ENSG00000226416	1.12533	0.000943746	MRPL23-AS1	antisense	0.679512	-3.21208	1.92042	1.23693	0.183915	2.00942	-0.490388	3.65627	0.974162	2.47937	-3.98591	1.87727	1.01498	1.46939	-2.21416	-1.12627	-2.40579	-1.92114	0.483447	0.677263	-1.32662	1.20794	-1.16049
ENSG00000233695	0.903574	0.000955752	GAS6-AS1	antisense	3.19835	-3.69751	3.18291	1.49877	0.183915	1.50985	-0.34101	0.71316	-1.53748	2.4455	0.872069	1.34333	1.73461	2.94726	2.02204	0.799733	1.0296	1.95987	1.52393	2.02122	-1.45787	1.75998	0.584932
ENSG00000268568	-0.676173	0.000969481	AC007228.9	lincRNA	1.37876	1.60262	0.595249	0.125036	2.32578	-0.963467	2.36125	-1.36139	-0.239143	-0.986776	1.93533	0.873418	2.4327	1.35216	2.68903	1.38107	1.72724	1.80859	1.40512	1.34938	2.32474	0.894121	2.11836
ENSG00000231770	0.58306	0.000979909	TMEM44-AS1	antisense	-0.305058	-0.809982	1.55414	1.71	0.294946	2.15083	1.17946	1.69751	1.25869	1.62869	0.167893	1.88494	1.85177	1.92434	0.235152	1.3955	-0.735935	0.67976	-0.269243	1.48235	-0.992202	1.86001	1.05582
ENSG00000255421	0.667177	0.00099114	CTD-2011F17.2	antisense	-1.77218	-1.62712	0.965006	-0.483386	-2.34446	-1.47366	-0.438857	0.560004	-1.79274	0.0316027	-1.91552	-1.24721	-1.20981	0.0567002	-3.10724	-0.527629	-1.4729	-0.618581	-1.60109	0.191836	-2.68026	-0.0659862	-1.00003
ENSG00000246308	0.69358	0.000994721	RP11-685M7.3	antisense	1.10614	-1.26455	-0.208059	1.60269	-1.00051	0.621496	0.598617	1.64407	0.241747	0.907731	-0.69313	1.27489	0.0781715	-0.655498	-0.705142	1.00184	-1.34166	-0.542633	-0.309321	0.146748	-1.0953	0.129934	-3.663
ENSG00000258711	0.985758	0.00100083	RP11-218E20.3	lincRNA	-3.05229	-6.01944	-3.07313	-2.71368	-3.72298	-1.8742	-6.27175	-1.2765	-6.74694	-6.27218	-6.30784	-4.35155	-6.63607	-3.88816	-5.91459	-6.25555	-5.86522	-3.02068	-3.65171	-5.83053	-5.85018	-2.38791	-5.24796
ENSG00000228061	0.883846	0.00100127	Z83001.1	antisense	-3.53772	-3.69751	-2.18004	-2.02181	-3.23755	-1.8742	-6.27175	-3.59843	-2.84005	-1.51729	-6.30784	-2.28116	-2.93563	-3.40273	-5.91459	-3.08562	-3.05786	-2.3686	-3.65171	-4.24557	-5.85018	-2.38791	-5.24796
ENSG00000232411	0.863776	0.00100236	AC009495.3	lincRNA	-1.61172	-3.69751	-1.35692	-2.95469	-3.23755	-1.3086	-3.94982	-2.15785	-6.74694	-1.62832	-3.98591	-3.50355	-2.93563	-2.3032	-2.74467	-1.86323	-5.86522	-1.92114	-2.37161	-1.74307	-2.14974	-3.52542	-5.24796
ENSG00000233754	-1.01542	0.00100495	AP001628.7	lincRNA	-5.85965	-2.11255	-5.88048	-6.41412	-1.95744	-6.51806	-3.46439	-2.31832	-4.42501	-6.27218	-1.78428	-6.67348	-2.93563	-6.21009	-5.91459	-6.25555	-3.05786	-5.82803	-3.28914	-4.24557	-5.85018	-5.84735	-5.24796
ENSG00000261049	0.837877	0.00100538	RP11-357N13.1	antisense	-2.68972	-4.43447	-2.42105	-3.60677	-6.0449	-2.81762	-2.02382	-3.59843	-6.74694	-2.57174	-3.98591	-2.58601	-5.05111	-2.75065	-5.91459	-3.93362	-4.28026	-3.02068	-4.13714	-2.3711	-5.85018	-2.67742	-2.4406
ENSG00000269696	0.642032	0.00101837	AC007228.11	antisense	-0.650193	-2.84951	-0.595082	0.969581	-1.95744	0.168445	-1.06229	-1.5478	-1.99205	0.522238	-0.753251	-0.134318	-2.38815	-1.16569	-1.82713	-0.42266	-1.95833	-1.30447	-0.844358	0.146748	-0.0172932	-0.421081	-2.4406
ENSG00000240207	1.20906	0.00104292	RP11-379F4.4	antisense	-1.61172	-6.01944	-1.63256	-0.147337	-6.0449	-0.0751119	-1.51686	-1.19633	-1.32067	-1.22778	-3.50049	-0.40669	-1.68188	-2.75065	-5.91459	-0.763697	-5.86522	-5.82803	-6.45907	-3.02318	-3.04283	-0.802952	-2.4406
ENSG00000227502	-1.49775	0.00106042	RP1-249H1.4	lincRNA	-5.85965	0.0890887	-1.97359	-6.41412	-1.79698	-6.51806	-3.46439	-6.40578	1.3668	-6.27218	-0.815987	-6.67348	-1.14422	-3.40273	-5.91459	-6.25555	-0.137297	-1.58011	-0.392979	-2.3711	-2.14974	-2.38791	-5.24796
ENSG00000270112	-1.15925	0.0010722	RP11-742D12.2	processed_transcript	-5.85965	-1.62712	-5.88048	-6.41412	0.183915	-6.51806	-2.57131	-6.40578	-6.74694	-6.27218	-2.6074	-3.21405	-3.82872	-6.21009	-5.91459	-6.25555	-2.16478	-5.82803	-6.45907	-5.83053	-5.85018	-5.84735	-1.78853
ENSG00000266933	1.08419	0.00108859	AC005775.2	antisense	-5.85965	-6.01944	-3.07313	-1.12872	-1.79698	-0.409531	-3.46439	-2.01346	-1.61765	-2.36529	-6.30784	-1.8155	-3.17664	-1.81777	-3.10724	-1.21116	-5.86522	-3.50611	-3.65171	-0.876335	-5.85018	-1.09246	-5.24796
ENSG00000259349	0.787064	0.00109969	RP11-15E18.1	antisense	-1.21579	-6.01944	-1.63256	-1.20467	-3.72298	-0.963467	-1.87943	-0.979516	-2.35462	-1.4142	-3.50049	-2.42555	-3.17664	-3.04016	-2.74467	-1.73199	-3.05786	-3.50611	-3.28914	-1.5826	-2.68026	-2.67742	-5.24796
ENSG00000177699	-0.984812	0.00111144	RP11-16K12.1	antisense	-5.85965	-3.69751	-5.88048	-6.41412	-2.34446	-6.51806	-1.87943	-6.40578	-3.57701	-6.27218	-2.22038	-6.67348	-6.63607	-3.40273	-3.10724	-6.25555	-5.86522	-5.82803	-6.45907	-5.83053	-5.85018	-5.84735	-2.07803
ENSG00000233154	0.95773	0.00112914	RP4-655J12.4	lincRNA	-1.95276	-6.01944	-1.79302	0.6193	-1.95744	0.55876	-0.389104	0.164075	-0.407087	-0.439288	-2.22038	0.639406	-1.02136	-0.279349	-4.32963	-0.47419	-3.54329	-2.65811	-1.93551	-0.621078	-1.32662	0.72251	-2.92603
ENSG00000230063	0.869479	0.00113643	RP11-384C4.6	sense_intronic	-3.05229	-2.319	-1.97359	-2.02181	-2.34446	-2.27013	-2.57131	-0.624421	-2.65947	-0.986776	-4.72288	-2.42555	-5.05111	-1.96216	-3.10724	-1.73199	-5.86522	-3.02068	-2.99964	-1.18668	-5.85018	-0.718063	-1.78853
ENSG00000233862	0.937666	0.00114508	AC016907.3	antisense	-0.131726	-1.77151	-0.325896	-1.55614	-0.687352	-0.540776	-3.46439	-0.913928	-4.42501	0.761245	-3.98591	-2.58601	-1.27852	-2.3032	-3.10724	-1.39757	-3.05786	0.711124	-1.50487	1.58732	-3.04283	-0.232636	-1.00003
ENSG00000226505	0.901002	0.00118309	AC016700.3	processed_transcript	-0.244937	-2.319	-1.48817	0.215233	0.104843	-0.685165	-2.57131	0.414398	-0.8162	0.0316027	-3.13792	-0.298438	-0.0662184	-1.35211	-2.21416	-1.12627	-4.28026	-2.65811	-2.37161	0.100206	-3.52826	0.342479	-5.24796
ENSG00000253687	0.908493	0.00119862	CTC-348L5.1	antisense	-3.05229	-6.01944	-4.29552	-4.0922	-3.23755	-0.736696	-2.57131	-4.08385	-6.74694	-4.68722	-6.30784	-5.08851	-4.31415	-2.12262	-5.91459	-2.55511	-4.28026	-3.50611	-6.45907	-3.5086	-5.85018	-2.67742	-5.24796
ENSG00000229487	0.604038	0.00121367	ALG13-AS1	antisense	-1.61172	-2.56	-1.63256	-1.77027	-2.34446	-1.0262	-2.81232	-1.04823	-2.22338	-2.36529	-2.84841	-1.05877	-1.77809	-1.4552	-3.59267	-2.00762	-4.28026	-2.3686	-1.93551	-1.30697	-4.26522	-2.14691	-2.92603
ENSG00000250371	0.971053	0.00121522	RP11-22A3.2	lincRNA	-5.85965	-6.01944	-3.07313	-6.41412	-6.0449	-3.34813	-3.46439	-3.59843	-6.74694	-2.18472	-6.30784	-2.97304	-6.63607	-2.50965	-5.91459	-2.55511	-5.86522	-1.58011	-2.75863	-5.83053	-5.85018	-3.03999	-5.24796
ENSG00000271980	-1.27432	0.00127649	CTD-2256P15.4	antisense	-5.85965	-6.01944	-5.88048	-6.41412	-6.0449	-6.51806	-6.27175	-6.40578	-3.28751	-6.27218	0.231319	-6.67348	-0.908154	-6.21009	-5.91459	-6.25555	-5.86522	-5.82803	-2.21114	-5.83053	-0.895987	-2.67742	0.178307
ENSG00000259070	-0.835517	0.00127711	LINC00639	lincRNA	-5.85965	-6.01944	-5.88048	-6.41412	-6.0449	-6.51806	-2.57131	-6.40578	-2.35462	-6.27218	-3.50049	-3.86612	-2.38815	-6.21009	-5.91459	-6.25555	-5.86522	-5.82803	-3.65171	-5.83053	-3.04283	-5.84735	-5.24796
ENSG00000256164	0.954113	0.00128202	CCND2-AS1	antisense	-2.15921	-6.01944	-1.79302	-0.92227	-3.23755	-1.38877	-1.14246	0.308465	-1.88896	-1.06272	-2.05991	-1.24721	-1.59168	-1.0808	-3.59267	-0.64084	-3.05786	-4.24307	-6.45907	-2.3711	-3.04283	-1.75988	-5.24796
ENSG00000266783	-1.14838	0.00130493	RP11-715F3.2	sense_intronic	-5.85965	-1.77151	-5.88048	-6.41412	-2.34446	-6.51806	-6.27175	-6.40578	-6.74694	-6.27218	-1.44986	-6.67348	-2.93563	-6.21009	-2.45516	-6.25555	-2.16478	-5.82803	-1.50487	-5.83053	-5.85018	-1.94046	-5.24796
ENSG00000262884	1.03591	0.00130646	CTD-3060P21.1	antisense	-3.05229	-6.01944	-0.671031	-0.987859	-3.23755	-1.1605	-3.10182	-0.913928	-1.07451	-0.780325	-1.55295	-0.74274	-1.35067	-4.62512	-5.91459	-2.00762	-5.86522	-1.92114	-4.13714	-3.02318	-5.85018	-3.03999	-5.24796
ENSG00000223884	0.842008	0.00132565	AC019048.1	antisense	-3.53772	-3.69751	-3.55856	-2.32666	-4.45994	-2.27013	-2.57131	-3.23586	-3.57701	-2.02425	-6.30784	-3.50355	-4.31415	-1.56623	-5.91459	-4.67059	-5.86522	-3.50611	-4.87411	-1.5826	-2.39075	-1.94046	-5.24796
ENSG00000264263	0.799902	0.0013266	RP11-671P2.1	antisense	-3.53772	-6.01944	-5.88048	-6.41412	-6.0449	-6.51806	-6.27175	-4.08385	-6.74694	-3.10225	-6.30784	-4.35155	-6.63607	-6.21009	-5.91459	-2.79612	-5.86522	-5.82803	-6.45907	-3.5086	-5.85018	-2.38791	-5.24796
ENSG00000240093	-1.17012	0.00133491	AC093627.12	antisense	-1.61172	-1.62712	-5.88048	-6.41412	-3.23755	-6.51806	-4.68678	-6.40578	-3.0465	-6.27218	-1.55295	-6.67348	-6.63607	-3.04016	-2.45516	-6.25555	-2.16478	-3.50611	-2.21114	-5.83053	0.489667	-3.52542	-2.92603
ENSG00000189419	0.997888	0.00134147	SPATA41	lincRNA	-1.61172	-6.01944	-1.63256	-1.12872	-3.23755	-1.56386	-1.74819	-1.2765	-2.49901	-2.18472	-3.50049	-1.00105	-2.54861	-1.81777	-5.91459	-2.00762	-2.40579	-1.92114	-2.75863	-5.83053	-5.85018	-0.0659862	-5.24796
ENSG00000267543	0.821947	0.00135421	RP11-666A8.7	sense_intronic	1.50668	-1.16145	1.1748	0.125036	-0.687352	-0.0102608	-1.06229	0.942947	-0.443157	-0.0433594	-1.02244	1.62573	0.764805	0.0567002	-2.45516	1.53235	-3.54329	-2.3686	-1.70418	-0.972551	-3.04283	0.342479	-0.49307
ENSG00000263164	0.891337	0.00136063	RP11-333E1.2	lincRNA	-1.77218	-6.01944	-1.35692	-0.53148	-1.18692	0.0518002	-4.68678	-0.339692	-2.10308	-1.74862	-2.40095	-1.00105	-2.11251	-3.40273	-4.32963	-3.44819	-4.28026	-1.92114	-4.13714	-1.18668	-3.52826	-2.67742	-2.4406
ENSG00000254933	-1.08246	0.00138247	RP11-619A14.2	antisense	-3.53772	-2.319	-5.88048	-6.41412	-1.79698	-6.51806	-4.68678	-6.40578	-6.74694	-6.27218	-0.377103	-6.67348	-5.05111	-2.75065	-2.0077	-2.79612	-1.77775	-4.24307	-2.99964	-5.83053	-2.68026	-5.84735	-2.92603
ENSG00000234425	0.771994	0.00138329	RP11-528G1.2	antisense	-3.05229	-3.21208	-3.07313	-1.77027	-2.58547	-1.3086	-2.57131	-0.851192	-4.42501	-1.31798	-2.6074	-2.97304	-2.72918	-2.75065	-3.59267	-1.61169	-5.86522	-2.3686	-2.99964	-2.13009	-5.85018	-1.59942	-2.92603
ENSG00000259084	1.3483	0.0014189	RP11-1070N10.6	sense_overlapping	-0.244937	-1.16145	0.00215867	5.24096	-0.0225362	4.2901	3.75478	2.77164	-2.22338	2.34621	-0.815987	3.46735	1.71707	0.265647	1.02792	0.982855	-5.86522	2.47117	1.51248	3.35682	-1.45787	3.92249	1.09189
ENSG00000246662	-0.836628	0.00145681	LINC00535	antisense	-5.85965	-2.84951	-5.88048	-6.41412	-6.0449	-6.51806	-3.10182	-6.40578	-3.28751	-6.27218	-2.84841	-6.67348	-6.63607	-6.21009	-3.59267	-6.25555	-5.86522	-5.82803	-4.87411	-5.83053	-5.85018	-3.52542	-2.4406
ENSG00000241520	0.838291	0.00146226	AC098820.4	antisense	-3.53772	-6.01944	-3.07313	-2.95469	-6.0449	-2.81762	-6.27175	-3.23586	-3.93958	-2.81275	-6.30784	-3.86612	-6.63607	-6.21009	-5.91459	-4.67059	-3.54329	-5.82803	-6.45907	-5.83053	-5.85018	-2.67742	-5.24796
ENSG00000232931	0.619006	0.00146782	LINC00342	lincRNA	5.21249	1.39842	5.43636	4.51735	4.61241	4.76908	4.1195	5.89085	4.25517	5.3282	3.57327	5.41166	4.75463	4.71843	2.44735	4.86534	2.0113	3.28831	4.49876	3.89569	3.02326	4.15406	4.04436
ENSG00000250195	0.780049	0.00147967	RP11-371F15.3	antisense	-3.53772	-3.69751	-2.42105	-3.60677	-6.0449	-2.27013	-3.10182	-2.01346	-3.0465	-1.74862	-3.98591	-3.21405	-6.63607	-3.40273	-5.91459	-2.79612	-4.28026	-3.02068	-2.99964	-3.02318	-5.85018	-3.03999	-2.92603
ENSG00000247950	0.651078	0.00148657	SEC24B-AS1	antisense	0.854599	-1.93197	-0.595082	0.824281	0.294946	1.55341	0.0320333	1.04543	-0.638413	0.170765	-0.241751	0.948575	0.440742	0.778598	-0.785312	1.95877	-1.95833	-0.698752	0.110788	0.00235828	-2.14974	1.48357	0.424468
ENSG00000248901	1.24709	0.00149506	AC008834.1	lincRNA	-1.00167	-6.01944	-2.71056	0.155732	-3.23755	0.758069	-1.41377	-1.2765	-6.74694	1.74463	-0.950288	-0.790834	-1.59168	-4.62512	-5.91459	-0.897998	-2.16478	-3.50611	-6.45907	0.146748	-1.60226	-1.32378	-2.92603
ENSG00000263214	0.86425	0.00150305	ZNF205-AS1	antisense	-1.46733	-1.77151	-0.45422	-0.686203	-1.95744	-1.1605	-1.22735	-1.04823	-0.72457	-1.06272	-3.13792	0.172013	-1.27852	0.265647	-2.0077	-1.12627	-5.86522	-1.58011	-2.75863	-0.876335	-5.85018	0.527693	-0.724396
ENSG00000240710	0.698065	0.00150505	RP11-430C7.4	antisense	1.08287	-3.21208	1.39564	1.47462	-0.0676241	1.52086	0.103292	-0.0659308	-0.864294	1.0407	-1.78428	-0.134318	-0.908154	1.72655	0.743616	0.283609	0.112062	0.886211	1.87632	1.55317	0.0324598	0.595598	-1.34107
ENSG00000237781	-0.762123	0.00151316	RP11-54A4.2	antisense	-0.815252	-1.77151	-3.07313	-2.32666	-0.618639	-2.43059	-2.36486	-2.70534	-2.10308	-2.02425	-0.52648	-4.35155	-0.908154	-1.16569	-0.705142	-3.44819	1.27433	-1.07315	-0.155287	-1.5826	-0.177758	-2.14691	0.109594
ENSG00000259376	0.669539	0.00153532	RP11-505E24.3	antisense	-3.53772	-6.01944	-2.18004	-2.95469	-3.72298	-3.7107	-4.68678	-1.65089	-2.65947	-3.46482	-3.98591	-2.97304	-4.31415	-2.75065	-3.59267	-2.34866	-3.54329	-3.50611	-4.87411	-2.3711	-5.85018	-3.52542	-3.663
ENSG00000260555	1.06171	0.00153547	RP11-728K20.2	lincRNA	-0.305058	-1.93197	-0.83609	1.20793	0.144921	-0.214275	-0.122	0.439709	-1.99205	-0.490818	-2.22038	-2.58601	-6.63607	-1.81777	-5.91459	-1.30135	-5.86522	-0.970054	-3.28914	-2.3711	-2.68026	-1.45503	-2.4406
ENSG00000235151	-1.06561	0.0015425	AC114730.2	antisense	2.77335	1.12012	0.30934	-1.55614	2.37716	-2.81762	1.79971	-0.102	0.26429	-3.46482	2.73382	-2.14991	0.694843	3.44634	3.19131	0.842482	3.22489	-0.213325	-0.309321	-1.07564	1.97637	-1.94046	0.68278
ENSG00000257761	1.19394	0.00154638	RP11-186F10.2	antisense	-0.0782867	0.389955	-0.751201	2.84562	0.641597	2.41564	1.62912	3.88309	2.00461	3.26504	-1.66398	2.31236	0.712654	0.504159	-5.91459	1.1623	-2.40579	0.321712	0.700803	3.5336	-0.122263	1.83213	-2.92603
ENSG00000250295	-0.660729	0.0015536	RP11-434I12.2	antisense	-0.502094	-1.37558	-1.79302	-1.05657	0.258877	-1.1605	0.98564	-2.49889	-1.70254	-2.02425	0.562525	-2.14991	-0.613706	-1.25589	-0.24217	-1.39757	1.2116	0.321712	-0.967215	-1.74307	0.215906	-2.38791	0.306631
ENSG00000248265	0.852008	0.00156056	RP11-834C11.3	lincRNA	-5.85965	-6.01944	-5.88048	-3.60677	-6.0449	-2.81762	-6.27175	-1.88222	-6.74694	-6.27218	-6.30784	-3.21405	-6.63607	-6.21009	-5.91459	-2.55511	-5.86522	-5.82803	-6.45907	-5.83053	-5.85018	-3.03999	-5.24796
ENSG00000240350	-0.956278	0.00157702	AC017002.1	lincRNA	-3.05229	-0.809982	-5.88048	-6.41412	-2.58547	-3.34813	-4.68678	-3.23586	-3.0465	-3.46482	-1.26345	-6.67348	-2.72918	-3.04016	-2.0077	-6.25555	-3.05786	-1.92114	-2.37161	-5.83053	-3.04283	-3.52542	-1.00003
ENSG00000255669	0.917475	0.00159716	RP11-885B4.2	lincRNA	-4.27468	-3.21208	-1.63256	-2.1662	-2.34446	-1.3086	-3.94982	-2.94635	-5.16197	-1.62832	-6.30784	-2.02962	-3.82872	-3.04016	-5.91459	-2.16809	-5.86522	-5.82803	-3.28914	-2.13009	-3.52826	-2.14691	-5.24796
ENSG00000261126	0.704664	0.00160459	RBFADN	processed_transcript	2.29517	-0.890153	1.1748	2.18207	0.825461	2.08557	2.47309	0.223576	-1.99205	0.867373	-0.753251	2.30666	1.45668	2.03309	-0.299885	0.314306	-1.00724	0.0546082	-0.192281	0.645202	-0.235473	2.30747	0.424468
ENSG00000265257	1.17283	0.00161955	RP11-21J18.1	processed_transcript	-5.85965	-6.01944	-0.0991247	-4.82916	-6.0449	-4.19613	-1.51686	-0.624421	-5.16197	-1.74862	-6.30784	-1.8155	-5.05111	-3.40273	-5.91459	-0.47419	-5.86522	-1.43572	-6.45907	-4.24557	-4.26522	-5.84735	-5.24796
ENSG00000261451	1.18756	0.00165629	RP11-981G7.1	sense_overlapping	-5.85965	-6.01944	-0.388631	-0.632764	-3.23755	0.916573	-6.27175	-3.59843	-2.22338	0.0316027	-2.05991	-1.00105	-1.77809	-1.96216	-5.91459	-1.73199	-3.05786	-1.58011	-6.45907	-2.3711	-2.39075	-2.38791	-5.24796
ENSG00000228140	-0.672046	0.00167547	RP3-467K16.4	lincRNA	-1.61172	-0.291515	-1.35692	-2.50723	1.81928	-2.61116	-1.22735	-1.76192	-0.914047	-1.06272	0.231319	-2.14991	0.543835	-2.50965	-1.52228	-2.00762	-0.0323278	-0.0466751	0.0487268	0.191836	-0.805789	-0.89315	-0.389977
ENSG00000269425	0.931238	0.00168886	AC007292.7	antisense	-3.53772	-6.01944	-3.55856	-3.2442	-3.72298	-3.7107	-6.27175	-1.65089	-5.16197	-1.87986	-6.30784	-3.50355	-6.63607	-4.62512	-4.32963	-3.44819	-4.28026	-1.07315	-6.45907	-2.13009	-3.04283	-5.84735	-3.663
ENSG00000216863	0.913653	0.00169219	LY86-AS1	antisense	-2.15921	-6.01944	-0.522932	-2.1662	-3.23755	-4.19613	-3.46439	-1.88222	-1.46154	-2.36529	-2.84841	-0.103621	-2.11251	-2.50965	-3.10724	-1.61169	-5.86522	-0.336182	-2.75863	-1.5826	-5.85018	-2.38791	-3.663
ENSG00000228878	0.690555	0.00169353	AC007551.3	lincRNA	-0.367793	0.850929	1.99603	1.61378	0.494255	0.882824	-0.205658	1.66568	0.687691	1.21164	-0.881575	1.69721	1.19047	1.44097	-0.186675	1.05733	-2.69529	-1.18418	-1.10152	1.13525	-0.992202	1.69955	-1.00003
ENSG00000237697	-1.02819	0.0016976	LINC00312	lincRNA	-5.85965	-6.01944	-5.88048	-6.41412	-3.23755	-6.51806	-1.41377	-3.59843	-3.0465	-2.81275	-2.22038	-6.67348	-6.63607	-6.21009	-3.10724	-6.25555	-2.16478	-5.82803	-4.87411	-5.83053	-5.85018	-5.84735	-1.00003
ENSG00000262155	0.849556	0.00169962	RP11-266L9.5	lincRNA	-0.574244	-1.16145	1.95872	-0.224299	-0.114167	1.2435	-0.163223	0.252431	-0.00547044	0.235617	-2.84841	0.583911	0.397349	0.929465	-0.422742	-0.372907	-5.86522	-0.542633	-1.24961	1.36914	-1.60226	1.41004	-0.724396
ENSG00000157306	0.587008	0.00171926	RP11-66N24.4	antisense	0.616087	-3.69751	0.562459	0.125036	-0.212014	1.0744	0.62307	0.414398	-0.337546	-0.122431	-0.635415	0.196888	-0.332293	0.635404	-0.24217	-0.42266	-1.00724	1.01746	-0.626178	0.319215	-1.45787	1.04747	-0.293761
ENSG00000260737	-1.0848	0.00172774	RP11-18F14.1	lincRNA	-3.05229	-1.49587	-3.55856	-6.41412	-2.58547	-4.19613	-3.46439	-6.40578	-4.42501	-3.46482	-1.44986	-6.67348	-6.63607	-6.21009	-1.52228	-6.25555	0.0174253	-5.82803	-3.65171	-3.5086	-1.45787	-5.84735	-5.24796
ENSG00000260219	-0.641505	0.00177756	RP11-347C12.10	lincRNA	1.17378	1.38144	0.22804	-1.28484	0.613307	-0.540776	0.647116	-0.572891	-0.680848	-0.657468	1.15977	-1.18162	0.105393	0.635404	0.826872	-1.0461	2.38745	0.238054	0.680483	-0.338679	0.258341	-1.09246	3.05125
ENSG00000228544	0.624845	0.00177912	CCDC183-AS1	antisense	2.80213	-0.809982	2.63915	2.51957	1.83161	3.17369	3.06141	2.9184	2.8915	2.94941	1.39952	2.67304	2.34977	3.22663	0.980223	1.76126	-0.507666	1.93352	2.47462	2.59153	0.0805541	2.05352	0.366752
ENSG00000232679	-0.894709	0.00185771	RP11-400N13.3	lincRNA	-5.85965	-3.21208	-5.88048	-6.41412	-3.72298	-6.51806	-6.27175	-6.40578	-6.74694	-6.27218	-6.30784	-6.67348	-6.63607	-6.21009	-1.15971	-6.25555	-2.69529	-5.82803	-3.65171	-5.83053	-5.85018	-5.84735	-2.4406
ENSG00000225889	-0.784385	0.001871	AC074289.1	antisense	0.248878	0.69481	1.86771	-1.05657	1.11497	-1.56386	-0.34101	-0.0307413	1.50573	-2.57174	2.26581	0.445464	3.37934	-1.00063	1.07409	-0.42266	0.284529	1.79402	1.00854	0.235557	0.524856	-0.0144559	3.08743
ENSG00000271270	0.797275	0.00192546	TMCC1-AS1	antisense	2.37397	-1.37558	3.53526	3.33239	0.72328	3.51399	2.70839	2.91389	3.43918	1.27472	0.460344	2.9357	2.74114	3.32713	2.33807	3.02754	0.764139	0.647699	0.140845	2.73552	-1.76272	3.23746	1.78547
ENSG00000246985	0.617865	0.00192648	SOCS2-AS1	processed_transcript	3.94932	3.99876	4.17886	4.91287	1.84384	6.25488	5.08195	6.33083	5.08397	6.08345	4.83235	7.39186	6.05894	4.7878	4.00576	6.02377	4.54735	5.3375	3.43726	5.63656	4.01245	5.37001	4.56422
ENSG00000261707	0.89649	0.00193031	RP11-264M12.2	antisense	-5.85965	-3.69751	-5.88048	-3.60677	-6.0449	-2.61116	-6.27175	-2.15785	-6.74694	-3.95025	-6.30784	-2.97304	-3.46615	-1.56623	-3.59267	-1.86323	-5.86522	-3.50611	-4.13714	-4.24557	-5.85018	-3.03999	-5.24796
ENSG00000248554	0.689155	0.00193112	RP11-159F24.6	antisense	-0.305058	-2.56	-0.388631	-0.581233	-1.65259	-0.368308	-0.986345	-0.339692	-1.88896	-1.1429	-1.66398	-1.31592	-1.08149	-0.924684	-5.91459	-0.763697	-3.05786	-0.698752	-1.17367	-1.07564	-1.0953	-1.09246	-2.92603
ENSG00000262312	0.907108	0.00195118	LA16c-390H2.4	sense_overlapping	-1.61172	-2.84951	-0.388631	-1.20467	-1.29002	-0.289237	-1.22735	-0.624421	-0.864294	-0.163654	-4.72288	-0.165682	-1.08149	-0.783822	-5.91459	-3.44819	-5.86522	-1.43572	-1.60109	-0.786138	-3.04283	-0.989365	-2.92603
ENSG00000232532	0.88633	0.00196128	RP11-63K6.7	antisense	-5.85965	-6.01944	-5.88048	-2.95469	-6.0449	-2.61116	-6.27175	-2.70534	-6.74694	-2.81275	-6.30784	-4.35155	-6.63607	-3.40273	-5.91459	-3.93362	-3.05786	-5.82803	-6.45907	-2.66061	-3.04283	-3.03999	-5.24796
ENSG00000231690	-1.06669	0.00196851	LINC00574	lincRNA	-2.15921	-2.319	-5.88048	-6.41412	-0.553051	-3.7107	-2.57131	-2.70534	-4.42501	-6.27218	-2.05991	-6.67348	-3.82872	-6.21009	-2.21416	-6.25555	-1.77775	-5.82803	-6.45907	-5.83053	-3.04283	-3.03999	-2.4406
ENSG00000272823	-0.904743	0.00198992	RP11-295M18.6	lincRNA	-5.85965	-6.01944	-5.88048	-6.41412	-3.23755	-6.51806	-1.74819	-6.40578	-6.74694	-6.27218	-6.30784	-6.67348	-4.31415	-6.21009	-2.0077	-6.25555	-3.05786	-3.02068	-3.65171	-5.83053	-3.04283	-5.84735	-5.24796
ENSG00000253921	0.827326	0.00200041	CTB-113P19.3	antisense	-2.40021	-3.69751	-1.79302	-1.77027	-3.72298	-3.05862	-6.27175	-2.01346	-2.49901	-1.62832	-2.84841	-2.97304	-3.82872	-3.04016	-3.59267	-1.86323	-5.86522	-5.82803	-4.13714	-2.3711	-5.85018	-3.52542	-5.24796
ENSG00000236894	1.0481	0.00200261	RP11-128B16.3	lincRNA	-4.27468	-1.93197	0.0967955	-0.799413	-3.72298	-0.685165	-1.51686	-3.59843	-2.84005	-0.163654	-6.30784	-2.14991	-1.50679	-0.924684	-4.32963	-2.16809	-3.54329	-0.100114	-1.93551	-0.54513	-5.85018	-1.45503	-5.24796
ENSG00000231760	-0.87677	0.00201459	RP11-350J20.5	antisense	-2.40021	-2.11255	-2.18004	-2.71368	-0.316984	-1.3086	-2.81232	-2.70534	-1.70254	-3.95025	-0.158093	-0.840587	-1.88119	-6.21009	-1.52228	-3.08562	-1.00724	-1.74057	-0.967215	-5.83053	-1.32662	-4.26238	-0.724396
ENSG00000257647	0.681967	0.00201974	RP11-701H24.3	lincRNA	-1.00167	-0.890153	0.748872	0.89876	-2.34446	0.641816	0.783535	-0.215956	-0.480151	0.783104	-2.40095	-0.444658	-0.658794	-0.428727	-3.59267	-0.64084	-1.95833	-1.07315	-0.731147	-0.54513	-2.14974	-0.0659862	-2.4406
ENSG00000232909	0.672229	0.00202774	RP3-510O8.4	antisense	1.05922	-2.319	-0.388631	-1.12872	-2.58547	-0.635412	-0.657038	0.513082	-2.84005	-1.1429	-3.98591	-1.00105	-0.486327	-0.187719	-0.360006	-0.763697	-1.61729	0.238054	-0.528331	-1.07564	-1.94329	-0.637893	-2.4406
ENSG00000244493	1.09997	0.0020289	SLC9A9-AS2	antisense	-5.85965	-6.01944	-1.48817	-0.987859	-4.45994	-0.042322	-3.94982	-0.383413	-2.65947	-2.02425	-1.02244	-0.52373	-1.88119	-1.00063	-4.32963	-1.21116	-4.28026	-2.1276	-2.99964	0.146748	-5.85018	0.691813	-0.118675
ENSG00000245688	1.01715	0.00203433	CTB-26E19.1	sense_intronic	-5.85965	-6.01944	-5.88048	-2.1662	-6.0449	-1.0262	-2.57131	-3.59843	-2.49901	-1.31798	-6.30784	-3.21405	-2.93563	-1.4552	-5.91459	-2.34866	-5.86522	-1.74057	-3.65171	-2.3711	-5.85018	-3.52542	-5.24796
ENSG00000227053	0.919419	0.00203838	RP11-395B7.4	antisense	-5.85965	-6.01944	-5.88048	-0.859534	-6.0449	-3.7107	-3.94982	-3.59843	-6.74694	-3.46482	-6.30784	-3.86612	-3.82872	-3.40273	-5.91459	-2.55511	-5.86522	-5.82803	-6.45907	-5.83053	-5.85018	-1.20349	-5.24796
ENSG00000251230	-0.791532	0.00204689	RP11-701P16.5	lincRNA	-3.53772	0.320414	-1.97359	-3.60677	1.23122	-0.214275	-0.914195	-1.88222	-0.8162	-2.57174	-0.815987	-3.21405	-0.613706	-2.3032	-0.186675	-3.08562	-0.0323278	-0.698752	-0.576425	-1.74307	-1.60226	-1.94046	-3.663
ENSG00000262877	0.71538	0.00204701	RP11-1055B8.4	lincRNA	2.55398	0.209383	3.38396	3.1347	1.9719	3.13837	-0.438857	5.11827	2.38492	3.13509	1.22354	4.10706	3.24198	1.25752	0.425255	1.66926	1.12347	1.58982	1.65467	3.49814	1.49854	2.57472	3.41382
ENSG00000228521	-0.777052	0.0020541	AC099552.3	lincRNA	-3.53772	-3.21208	-5.88048	-6.41412	-2.13801	-6.51806	-2.36486	-6.40578	-4.42501	-6.27218	-6.30784	-6.67348	-3.82872	-6.21009	-4.32963	-6.25555	-5.86522	-5.82803	-4.87411	-5.83053	-5.85018	-5.84735	-5.24796
ENSG00000173867	1.02372	0.00205754	RP11-97O12.7	processed_transcript	-4.27468	-6.01944	-1.79302	-2.1662	-3.23755	-1.3086	-2.02382	1.75913	-1.79274	0.414322	-6.30784	-2.76659	-4.31415	-1.68652	-1.82713	-1.39757	-4.28026	-1.58011	-1.41467	-1.07564	-2.39075	-0.421081	-3.663
ENSG00000255026	-0.600402	0.00205907	RP11-326C3.2	antisense	2.85116	2.2889	1.19633	2.42823	3.18632	0.933156	3.40949	0.754091	3.06203	2.69649	2.50914	0.120939	2.08844	2.00423	3.95731	2.68403	3.1488	3.40319	4.81064	2.48688	4.27781	2.76368	2.40309
ENSG00000259520	0.983349	0.00208519	CTD-2651B20.3	antisense	-3.05229	-3.21208	-3.55856	-1.55614	-3.23755	-3.7107	-6.27175	-1.76192	-1.32067	-2.02425	-6.30784	-2.97304	-3.46615	-1.25589	-3.10724	-1.39757	-5.86522	-5.82803	-6.45907	-2.13009	-5.85018	-0.718063	-3.663
ENSG00000255020	0.887192	0.00210595	AF131216.5	antisense	-3.05229	-6.01944	-5.88048	-3.60677	-6.0449	-2.81762	-3.46439	-3.59843	-6.74694	-2.81275	-6.30784	-6.67348	-6.63607	-4.62512	-5.91459	-3.44819	-5.86522	-3.02068	-3.65171	-1.07564	-5.85018	-5.84735	-5.24796
ENSG00000248210	1.4829	0.00214964	RP11-24I21.1	lincRNA	-0.90545	-6.01944	-3.55856	0.6193	-3.23755	2.74639	1.40773	3.66165	-1.32067	2.08097	-0.950288	-0.483652	-2.72918	-0.143997	-3.10724	1.87888	-1.95833	1.60659	0.907254	0.769381	-5.85018	-4.26238	-5.24796
ENSG00000264269	0.948086	0.00221752	RP11-15F12.1	antisense	-0.305058	-6.01944	-0.152564	3.07973	0.696563	1.5747	-0.599322	0.489037	0.472231	0.327735	-2.05991	2.38451	0.258744	-0.482166	-0.870201	0.733135	-1.61729	2.14351	1.26203	2.36423	0.657611	0.972833	-1.00003
ENSG00000228763	-0.852326	0.00225474	AC010095.5	antisense	-0.815252	-1.77151	-5.88048	-2.50723	-1.40105	-1.23265	-2.36486	-4.82082	-1.32067	-3.46482	-1.91552	-2.02962	-2.54861	-2.3032	-1.27074	-3.93362	-0.438953	-5.82803	-0.392979	-2.66061	-0.805789	-2.67742	-1.34107
ENSG00000225964	1.0101	0.00226499	AC017076.5	antisense	-0.815252	-6.01944	-0.152564	1.36066	-2.58547	0.776565	-0.00496091	-0.297256	-1.19235	0.469289	-0.158093	1.5114	0.158342	1.77291	-0.081705	-0.0267311	-5.86522	1.39113	1.54656	1.03983	0.339641	0.839155	-1.54752
ENSG00000228115	0.791137	0.00226804	RP11-165F24.5	sense_intronic	-5.85965	-6.01944	-2.71056	-2.32666	-6.0449	-3.34813	-4.68678	-6.40578	-6.74694	-3.10225	-6.30784	-3.50355	-3.82872	-2.75065	-5.91459	-4.67059	-5.86522	-5.82803	-6.45907	-5.83053	-5.85018	-3.03999	-5.24796
ENSG00000197558	0.695777	0.00228846	SSPO	processed_transcript	4.34615	0.423508	3.39797	5.58341	3.46882	5.04847	5.32677	3.58148	1.68352	5.1588	3.66227	2.57682	2.9731	2.84248	1.84696	4.21714	4.42365	3.98414	2.13712	4.42095	2.10982	4.87631	2.53994
ENSG00000250802	0.620577	0.00230975	ZBED3-AS1	antisense	1.10614	-1.26455	1.77057	1.41243	0.613307	1.46494	0.805068	2.22721	1.63244	1.85194	-0.0410536	1.35443	-0.0969152	0.232857	-0.186675	0.842482	-3.05786	0.238054	1.02475	1.1807	-0.122263	1.83213	0.901789
ENSG00000261578	1.44745	0.00231515	RP11-21L23.2	sense_overlapping	-0.187221	-6.01944	-1.48817	-0.632764	-6.0449	-6.51806	-6.27175	0.223576	-6.74694	-0.0433594	-6.30784	-2.14991	-1.77809	-0.537661	-5.91459	-2.00762	0.401569	-3.02068	-6.45907	-2.3711	-5.85018	-0.718063	0.424468
ENSG00000251661	0.652163	0.00234093	RP11-326C3.11	antisense	-0.574244	0.284345	0.00215867	0.456241	-0.687352	0.111301	-0.845483	0.813388	-0.00547044	1.21164	-0.52648	1.78185	-2.54861	1.77291	0.425255	1.30669	-2.40579	-0.470483	-0.350543	0.277993	-1.32662	-0.421081	0.0374445
ENSG00000248740	0.975438	0.00236292	RP11-328K4.1	lincRNA	-5.85965	-6.01944	-5.88048	-0.53148	-6.0449	-3.7107	-6.27175	-3.59843	-6.74694	-2.36529	-6.30784	-2.28116	-2.72918	-6.21009	-5.91459	-3.08562	-5.86522	-1.92114	-2.99964	-3.02318	-4.26522	-2.38791	-5.24796
ENSG00000197813	0.734237	0.00238763	CTC-301O7.4	lincRNA	-0.574244	-1.06524	-0.83609	1.32059	-0.835451	2.6693	1.39359	0.977924	0.14788	1.69937	-2.05991	0.269038	-0.52755	0.329072	-0.629193	-0.189461	-3.05786	-0.470483	-0.230249	1.65328	-1.94329	-0.174921	-1.00003
ENSG00000265737	1.05277	0.00239648	RP11-1157N2__B.2	antisense	-2.15921	-6.01944	-1.79302	0.843265	0.494255	1.30849	-1.87943	0.995099	-4.42501	0.783104	-2.84841	-1.54419	-1.42662	0.0567002	-2.0077	1.38107	-0.911021	-1.74057	0.459795	0.883714	-3.52826	-1.75988	-2.92603
ENSG00000261584	-1.55421	0.00242831	RP11-457M11.5	lincRNA	-5.85965	-2.56	-5.88048	-6.41412	-6.0449	-6.51806	-6.27175	-6.40578	-6.74694	-6.27218	0.0671993	-6.67348	0.375153	-6.21009	-0.960399	-6.25555	-5.86522	0.741821	0.596215	-5.83053	-1.60226	-5.84735	2.00943
ENSG00000259026	0.929349	0.0024682	RP11-907D1.1	lincRNA	-2.40021	-3.69751	-5.88048	-4.82916	-6.0449	-1.99449	-3.10182	-1.12038	-3.0465	-1.51729	-6.30784	-2.58601	-3.17664	-3.04016	-4.32963	-1.61169	-5.86522	-5.82803	-6.45907	-2.66061	-5.85018	-3.03999	-5.24796
ENSG00000248240	0.927211	0.00250052	RP11-159F24.5	antisense	-1.21579	-3.69751	-1.0225	-2.1662	-2.34446	-1.66007	-3.10182	-1.65089	-3.28751	-3.46482	-6.30784	-3.50355	-3.82872	-1.96216	-5.91459	-2.34866	-5.86522	-5.82803	-2.21114	-1.92364	-5.85018	-3.03999	-5.24796
ENSG00000229956	0.923071	0.00250413	ZRANB2-AS2	processed_transcript	-3.05229	-6.01944	-0.926288	-0.264376	-2.34446	-0.289237	0.298108	-2.49889	-2.22338	-0.122431	-3.13792	-1.24721	-1.99222	-0.655498	-2.21416	-0.897998	-5.86522	1.35187	-1.32978	-1.30697	-3.52826	0.381473	-1.16049
ENSG00000249752	1.1662	0.00254105	RP11-563M4.1	lincRNA	-2.68972	-6.01944	-5.88048	-0.581233	-3.72298	2.01722	-0.779894	-0.733355	-3.28751	0.266981	-3.50049	0.466074	-2.93563	-1.25589	-3.59267	-0.324812	-2.69529	-3.02068	-1.41467	-1.5826	-5.85018	-3.52542	-5.24796
ENSG00000226696	0.703883	0.00254932	LENG8-AS1	antisense	2.08872	0.170389	1.78485	2.15193	0.92088	2.55609	1.72261	2.46766	1.51516	2.2553	-2.6074	2.02349	1.42462	2.02353	-0.557043	1.35178	-1.61729	0.149245	0.0800909	0.146748	1.58444	1.66835	0.980861
ENSG00000259469	-0.939916	0.00254951	RP11-227D13.4	lincRNA	-5.85965	-2.319	-5.88048	-6.41412	-4.45994	-6.51806	-3.46439	-4.08385	-5.16197	-6.27218	-2.05991	-2.76659	-4.31415	-4.62512	-2.74467	-2.55511	-3.05786	-5.82803	-2.55218	-5.83053	-5.85018	-5.84735	-0.724396
ENSG00000267745	1.25311	0.00259227	RP11-686D22.8	processed_transcript	-3.05229	-6.01944	-1.79302	-2.1662	-6.0449	-6.51806	-6.27175	-6.40578	-6.74694	0.170765	-6.30784	-1.62908	-6.63607	-6.21009	-5.91459	-0.64084	-4.28026	-1.07315	-1.17367	-0.404267	-5.85018	-5.84735	-5.24796
ENSG00000231193	0.880558	0.00260863	RP11-462B18.2	lincRNA	-5.85965	-6.01944	-2.42105	-6.41412	-6.0449	-3.34813	-6.27175	-1.88222	-6.74694	-2.57174	-6.30784	-2.14991	-2.93563	-2.50965	-5.91459	-3.93362	-5.86522	-5.82803	-4.87411	-5.83053	-5.85018	-3.52542	-5.24796
ENSG00000230561	0.943087	0.00263713	CTC-228N24.1	lincRNA	-3.05229	-3.69751	-1.79302	-2.32666	-6.0449	-1.38877	-3.10182	-0.475043	-2.10308	-1.62832	-6.30784	-1.24721	-2.11251	-3.40273	-5.91459	-3.08562	-5.86522	-5.82803	-3.28914	-3.02318	-5.85018	-3.03999	-3.663
ENSG00000266049	0.606098	0.00263764	RP11-703M24.5	antisense	-0.730363	-1.62712	-0.522932	-1.20467	-2.13801	-2.81762	-3.94982	-1.5478	-1.70254	-0.845913	-2.6074	-2.28116	-1.88119	-0.924684	-2.74467	-0.829285	-4.28026	-1.43572	-3.65171	-1.74307	-2.39075	-2.14691	-2.4406
ENSG00000261218	0.622302	0.00265575	RP11-960L18.1	lincRNA	-1.95276	-0.661884	0.269263	0.480694	-0.490315	1.04419	-0.294468	0.0371627	-0.207779	0.62264	-1.44986	1.17827	-0.226683	0.0567002	-0.960399	0.153841	-3.54329	-0.618581	-1.60109	-0.54513	-2.14974	-0.292757	-1.78853
ENSG00000177406	0.648464	0.00266548	RP11-218M22.1	antisense	0.583297	0.355604	1.50322	2.79777	1.3388	1.86132	1.47645	2.19785	3.42173	3.82454	0.460344	2.30094	0.764805	2.43737	0.930895	1.60864	0.112062	1.18319	0.720841	1.62068	-1.32662	2.33753	-0.724396
ENSG00000250220	0.633009	0.00267328	RP11-692D12.1	antisense	-0.574244	-3.21208	-1.79302	-0.859534	-1.09071	-0.736696	-1.22735	-1.45158	-2.49901	-0.163654	-2.6074	-1.46402	-1.50679	-1.35211	-2.0077	-0.829285	-2.16478	-2.1276	-1.70418	-0.786138	-2.39075	-0.355493	-5.24796
ENSG00000230058	0.990524	0.00267763	RP11-172E9.2	lincRNA	-5.85965	-6.01944	-3.07313	-2.32666	-6.0449	-1.76317	-3.46439	-6.40578	-2.84005	-3.46482	-6.30784	-2.97304	-6.63607	-2.50965	-5.91459	-2.79612	-2.16478	-2.3686	-6.45907	-1.30697	-5.85018	-3.52542	-5.24796
ENSG00000226935	0.676365	0.00267851	LINC00161	lincRNA	-5.85965	-6.01944	-5.88048	-3.60677	-6.0449	-4.19613	-6.27175	-6.40578	-6.74694	-3.10225	-6.30784	-3.86612	-6.63607	-6.21009	-5.91459	-3.44819	-5.86522	-5.82803	-6.45907	-5.83053	-5.85018	-3.03999	-5.24796
ENSG00000261183	0.901443	0.00276843	RP11-532F12.5	antisense	-0.90545	-2.56	0.050253	0.18579	-0.430194	-0.84563	-1.87943	1.34241	0.736878	0.0676719	-1.55295	-1.24721	-3.17664	-1.68652	-2.0077	-0.42266	-5.86522	-2.3686	-2.99964	-1.30697	-5.85018	-1.20349	-2.4406
ENSG00000203356	0.702389	0.0027695	RP11-296A18.3	lincRNA	-3.05229	-6.01944	-3.07313	-2.71368	-3.23755	-2.81762	-3.46439	-2.94635	-2.35462	-2.81275	-2.84841	-2.42555	-3.82872	-3.04016	-4.32963	-2.55511	-3.05786	-3.02068	-6.45907	-3.5086	-5.85018	-2.38791	-5.24796
ENSG00000267052	0.688984	0.00280769	CTB-30L5.1	lincRNA	-5.85965	-6.01944	-5.88048	-4.82916	-6.0449	-3.7107	-6.27175	-3.59843	-6.74694	-4.68722	-6.30784	-6.67348	-6.63607	-6.21009	-5.91459	-6.25555	-5.86522	-3.02068	-6.45907	-3.5086	-5.85018	-3.03999	-5.24796
ENSG00000269923	1.0445	0.0028122	RP11-214K3.24	lincRNA	-5.85965	-6.01944	-1.35692	-1.55614	-6.0449	-6.51806	-6.27175	-0.851192	-3.93958	-6.27218	-6.30784	-1.62908	-3.46615	-1.81777	-5.91459	-1.86323	-5.86522	-5.82803	-6.45907	-2.3711	-3.04283	-2.67742	-5.24796
ENSG00000259631	-0.852281	0.00281562	RP11-557C18.4	lincRNA	-3.53772	-2.84951	-5.88048	-6.41412	-3.23755	-6.51806	-3.46439	-6.40578	-6.74694	-6.27218	-3.50049	-6.67348	-6.63607	-6.21009	-2.21416	-4.67059	-2.69529	-5.82803	-3.65171	-4.24557	-2.14974	-4.26238	-5.24796
ENSG00000259685	-0.698712	0.00282065	CTD-2315E11.1	lincRNA	-5.85965	-3.69751	-5.88048	-6.41412	-4.45994	-6.51806	-3.10182	-6.40578	-3.57701	-6.27218	-3.98591	-6.67348	-4.31415	-6.21009	-3.59267	-6.25555	-5.86522	-5.82803	-6.45907	-3.5086	-5.85018	-5.84735	-5.24796
ENSG00000235772	-0.756287	0.00282108	AP001625.6	antisense	3.72344	3.03856	0.30934	-0.00473235	2.01579	-0.214275	1.11196	0.649502	0.412934	0.235617	2.78756	-0.74274	0.375153	1.92434	3.11607	1.35178	3.82303	2.01117	2.09168	0.235557	4.22262	-0.292757	2.56582
ENSG00000230082	0.636758	0.00282897	PRRT3-AS1	antisense	-1.61172	-1.62712	-2.18004	-1.89056	-3.72298	-0.328231	-1.87943	-0.979516	-1.07451	-0.389535	-4.72288	-0.369696	-1.14422	-1.00063	-2.21416	-2.00762	-3.05786	-1.58011	-1.93551	-0.54513	-2.39075	-0.489794	-2.4406
ENSG00000237614	-0.836065	0.00284236	AC073257.2	lincRNA	-5.85965	-6.01944	-5.88048	-3.60677	-0.915621	-6.51806	-3.94982	-6.40578	-3.0465	-6.27218	-2.22038	-6.67348	-3.46615	-6.21009	-3.59267	-6.25555	-5.86522	-5.82803	-6.45907	-5.83053	-5.85018	-5.84735	-5.24796
ENSG00000231194	-0.880394	0.00285746	FARP1-AS1	antisense	-1.77218	-1.62712	-4.29552	-2.1662	-1.52134	-2.81762	-2.02382	-2.70534	-2.65947	-2.81275	0.0320099	-6.67348	-2.72918	-3.40273	0.193929	-1.61169	-0.735935	-0.970054	0.0166656	-1.30697	-0.35833	-1.94046	1.57222
ENSG00000225361	-1.17338	0.0029169	PPP1R26-AS1	antisense	-1.95276	-3.21208	-5.88048	-0.859534	-0.687352	-6.51806	-2.36486	-6.40578	-6.74694	-6.27218	-2.6074	-6.67348	-3.82872	-6.21009	-3.10724	-3.44819	0.0174253	-5.82803	-1.60109	-3.02318	0.299564	-3.52542	-0.85564
ENSG00000267688	0.926785	0.00291806	AC005262.2	antisense	-2.15921	-6.01944	-2.18004	-0.92227	-1.65259	-1.99449	-2.81232	-0.428501	-1.70254	-1.22778	-1.78428	-3.86612	-3.82872	-1.56623	-5.91459	-2.34866	-5.86522	-0.783641	-6.45907	-2.13009	-2.39075	-2.67742	-2.4406
ENSG00000214770	0.92973	0.00295776	RP11-544I20.2	antisense	-1.00167	-1.37558	-1.48817	-0.632764	-0.915621	-1.23265	-2.57131	-0.428501	-5.16197	-1.74862	-1.17856	-1.46402	-1.77809	-1.96216	-5.91459	-1.21116	-3.05786	-4.24307	-2.75863	-0.786138	-5.85018	-0.89315	-5.24796
ENSG00000265992	0.975909	0.00297926	ESRG	sense_intronic	-2.15921	-3.69751	-5.88048	-6.41412	-6.0449	-4.93309	-6.27175	-3.59843	-6.74694	-6.27218	-4.72288	-6.67348	-6.63607	-2.75065	-5.91459	-3.44819	-5.86522	-2.1276	-6.45907	-0.972551	-5.85018	-1.09246	-5.24796
ENSG00000196810	1.25921	0.00298622	CTBP1-AS2	antisense	-0.305058	1.83231	1.58712	2.60547	0.849914	0.19619	0.46972	1.09407	0.619385	2.36807	-2.22038	3.7705	2.81307	1.25752	2.59716	2.49599	-5.86522	1.95987	-2.21114	1.97037	-5.85018	3.24805	-1.00003
ENSG00000234956	0.838762	0.0029863	RP11-356I2.1	lincRNA	-5.85965	-3.69751	-3.07313	-2.71368	-6.0449	-2.27013	-2.02382	-3.59843	-6.74694	-0.780325	-3.50049	-2.97304	-3.82872	-2.3032	-5.91459	-3.08562	-5.86522	-3.50611	-4.13714	-2.3711	-3.52826	-2.67742	-5.24796
ENSG00000250062	0.879078	0.00299507	RP11-778J15.1	antisense	-2.68972	-6.01944	-4.29552	-3.60677	-6.0449	-3.05862	-3.94982	-1.88222	-2.84005	-2.57174	-6.30784	-3.86612	-1.68188	-3.40273	-3.59267	-2.16809	-5.86522	-5.82803	-6.45907	-1.74307	-5.85018	-3.03999	-5.24796
ENSG00000226576	0.98308	0.00300565	RP11-523O18.1	antisense	-5.85965	-6.01944	-1.48817	-3.2442	-6.0449	-1.1605	-6.27175	-2.94635	-3.93958	-3.46482	-6.30784	-6.67348	-6.63607	-3.88816	-5.91459	-2.55511	-5.86522	-5.82803	-3.65171	-0.54513	-5.85018	-5.84735	-5.24796
ENSG00000261770	-1.65726	0.00306279	CTC-459F4.1	lincRNA	-5.85965	-6.01944	-5.88048	-6.41412	-6.0449	-6.51806	0.496437	-6.40578	1.42799	-6.27218	-2.6074	-6.67348	0.258744	-6.21009	-0.133235	-6.25555	-0.579816	-1.58011	-0.192281	2.10611	-5.85018	-5.84735	-1.16049
ENSG00000267787	1.2279	0.0030945	RP11-35G9.5	antisense	-5.85965	-6.01944	2.06788	-1.12872	-2.34446	-2.43059	1.25963	-1.88222	-2.22338	-0.544258	-4.72288	-1.8155	-3.82872	-2.50965	-5.91459	1.35178	-3.54329	0.0546082	-4.87411	-1.5826	-5.85018	-0.989365	-3.663
ENSG00000259341	0.798575	0.0031317	RP11-20G13.1	lincRNA	-3.05229	-6.01944	-3.55856	-2.95469	-6.0449	-2.61116	-3.94982	-2.94635	-5.16197	-3.46482	-6.30784	-6.67348	-6.63607	-4.62512	-5.91459	-6.25555	-5.86522	-3.02068	-4.87411	-5.83053	-5.85018	-1.59942	-3.663
ENSG00000230054	0.61094	0.00314925	RP11-402G3.5	lincRNA	-1.10476	-2.56	-1.97359	-2.32666	-4.45994	-3.05862	-2.36486	-1.12038	-3.93958	-2.18472	-3.50049	-2.58601	-3.17664	-1.56623	-3.59267	-2.55511	-2.69529	-2.1276	-1.81521	-1.30697	-2.68026	-2.67742	-5.24796
ENSG00000256006	-0.666247	0.00318073	AC084117.3	sense_intronic	-2.15921	-2.11255	-4.29552	-2.95469	-2.58547	-3.7107	-2.81232	-2.70534	-1.79274	-6.27218	-2.05991	-4.35155	-1.08149	-2.75065	-2.45516	-3.44819	-1.22136	-3.50611	-2.99964	-2.3711	-1.76272	-1.94046	-1.34107
ENSG00000257496	0.907137	0.00321263	RP11-474P2.4	lincRNA	-0.187221	-2.319	-1.97359	-2.50723	-1.09071	-2.12574	-2.81232	-2.94635	-2.10308	-1.87986	-6.30784	-1.91859	-2.93563	-1.96216	-1.66667	-2.55511	-5.86522	-2.1276	-6.45907	-2.13009	-5.85018	-2.38791	-5.24796
ENSG00000267272	1.05313	0.00322835	LINC01140	lincRNA	-5.85965	-3.21208	-1.35692	-2.50723	-6.0449	-2.27013	-6.27175	-0.624421	-6.74694	-3.10225	-6.30784	-1.91859	-2.38815	-2.50965	-5.91459	-2.79612	-3.05786	-3.02068	-6.45907	-5.83053	-2.39075	-1.75988	-5.24796
ENSG00000251141	0.705541	0.00324278	RP11-53O19.1	antisense	-3.05229	-3.21208	-1.97359	-2.50723	-2.13801	-1.8742	-3.46439	-2.01346	-3.93958	-1.74862	-3.50049	-3.21405	-2.72918	-1.16569	-2.45516	-2.34866	-5.86522	-3.50611	-6.45907	-1.07564	-3.04283	-1.75988	-2.92603
ENSG00000258927	1.03438	0.0032519	RP11-1070N10.5	lincRNA	-3.05229	-6.01944	-3.07313	-4.82916	-6.0449	-6.51806	-6.27175	-3.59843	-6.74694	-1.62832	-6.30784	-6.67348	-6.63607	-2.3032	-5.91459	-3.08562	-5.86522	-5.82803	-6.45907	-4.24557	-5.85018	0.595598	-1.34107
ENSG00000240875	0.720781	0.00325231	LINC00886	lincRNA	-0.367793	0.209383	0.62731	1.33407	-1.79698	0.424459	-0.163223	0.536734	0.0212469	-0.206089	-1.78428	0.146702	-0.963649	-0.783822	-3.59267	0.373807	0.764139	-0.698752	-2.75863	-0.972551	-4.26522	0.998144	-0.293761
ENSG00000259293	1.24812	0.00326381	RP11-355N15.1	antisense	-2.15921	-6.01944	-3.07313	0.843265	-6.0449	0.0518002	-3.46439	-3.59843	-3.28751	-0.0433594	-6.30784	1.06123	-1.42662	-2.75065	-3.10724	-2.34866	-5.86522	-5.82803	-6.45907	-5.83053	-5.85018	-5.84735	-5.24796
ENSG00000258944	0.626912	0.00327457	RP4-647C14.3	antisense	-0.305058	0.170389	0.719428	1.61378	-0.490315	0.55876	1.04114	3.25064	-0.680848	1.24352	-1.09839	0.991859	0.461958	0.755698	-1.15971	1.32188	-0.579816	0.771878	1.00854	-0.47298	-1.76272	1.87375	0.860567
ENSG00000236226	0.848079	0.00336898	RP11-645N11.3	antisense	-5.85965	-6.01944	-2.42105	-3.2442	-6.0449	-3.05862	-3.46439	-3.59843	-6.74694	-2.18472	-3.50049	-2.42555	-6.63607	-3.04016	-5.91459	-3.93362	-3.05786	-5.82803	-3.65171	-2.3711	-5.85018	-2.67742	-5.24796
ENSG00000233571	0.68812	0.00337634	RP11-545D19.1	lincRNA	-4.27468	-6.01944	-4.29552	-2.95469	-3.72298	-2.12574	-3.94982	-3.59843	-6.74694	-3.46482	-6.30784	-4.35155	-5.05111	-3.40273	-3.59267	-6.25555	-5.86522	-4.24307	-6.45907	-4.24557	-5.85018	-4.26238	-5.24796
ENSG00000231718	0.87521	0.00341218	RP11-382E9.1	lincRNA	-3.53772	-6.01944	-3.07313	-4.0922	-3.23755	-1.66007	-2.57131	-2.94635	-3.93958	-1.62832	-6.30784	-2.02962	-3.82872	-6.21009	-5.91459	-1.61169	-5.86522	-3.02068	-6.45907	-4.24557	-5.85018	-2.67742	-2.92603
ENSG00000259895	1.23132	0.003419	RP11-715J22.2	antisense	-0.367793	-6.01944	-2.42105	-2.1662	-6.0449	0.830673	-1.41377	-6.40578	-0.680848	-1.87986	-3.50049	-0.230533	-1.14422	-3.40273	-5.91459	-2.00762	-5.86522	-2.1276	-3.65171	-0.338679	-5.85018	0.0833914	-5.24796
ENSG00000261069	1.2745	0.00348325	SNORD116-20	lincRNA	0.480204	-1.26455	1.88107	1.38678	-1.18692	1.56409	2.23208	0.133378	0.491467	2.18315	-0.33056	-0.264086	0.234291	0.531381	-5.91459	0.153841	-5.86522	-1.58011	1.60163	1.86296	-5.85018	1.84614	-5.24796
ENSG00000259442	1.08522	0.0035041	RP11-752G15.8	antisense	0.679512	-1.93197	1.31919	-2.71368	0.462891	1.45349	-0.00496091	0.308465	0.412934	2.05425	-2.84841	1.23941	0.503477	1.06604	-1.39103	-1.21116	-5.86522	-0.698752	-1.17367	1.28841	-5.85018	0.752567	-2.4406
ENSG00000233410	1.07258	0.00350776	RP11-16L9.3	lincRNA	-0.244937	-6.01944	-0.751201	2.0494	-1.29002	2.75107	0.203986	-0.572891	1.04097	2.36807	1.15977	2.89828	1.49835	0.531381	-2.0077	2.83985	-0.735935	0.400784	-0.677708	1.22475	-4.26522	-0.718063	-0.724396
ENSG00000264177	-0.964305	0.00351936	RP1-37N7.1	antisense	-5.85965	-3.21208	-2.42105	-6.41412	-1.52134	-6.51806	-3.10182	-3.59843	-2.22338	-6.27218	-1.78428	-6.67348	-3.82872	-6.21009	-2.21416	-1.73199	-3.05786	-5.82803	-3.65171	-3.02318	-2.68026	-1.45503	-2.92603
ENSG00000264808	0.904213	0.00354085	MIR4523	antisense	-3.05229	-6.01944	-2.71056	-6.41412	-3.72298	-1.3086	-2.36486	-2.94635	-5.16197	-1.4142	-3.50049	-2.97304	-2.11251	-4.62512	-5.91459	-2.16809	-5.86522	-3.50611	-6.45907	-1.92364	-5.85018	-2.38791	-5.24796
ENSG00000230381	0.90171	0.003551	RP4-655J12.5	lincRNA	-2.68972	-6.01944	-0.926288	-2.02181	-3.23755	-1.99449	-2.18428	-1.45158	-2.35462	-1.87986	-6.30784	-3.86612	-3.17664	-2.75065	-5.91459	-3.93362	-5.86522	-5.82803	-6.45907	-1.74307	-3.04283	-3.52542	-5.24796
ENSG00000237336	0.820371	0.00356063	RP11-230L22.4	antisense	-2.15921	-6.01944	-1.79302	-2.95469	-6.0449	-6.51806	-3.10182	-4.08385	-6.74694	-3.46482	-3.50049	-3.50355	-3.82872	-3.40273	-5.91459	-3.93362	-5.86522	-2.65811	-3.65171	-2.3711	-5.85018	-4.26238	-5.24796
ENSG00000239593	1.03327	0.00356591	RP11-477J21.6	antisense	-5.85965	-6.01944	-2.42105	-2.1662	-6.0449	-4.93309	-2.57131	-3.59843	-6.74694	-2.36529	-6.30784	-1.05877	-2.93563	-0.428727	-1.52228	-1.73199	-5.86522	-3.02068	-6.45907	-5.83053	-5.85018	-2.38791	-5.24796
ENSG00000259673	0.667473	0.00362047	IQCH-AS1	lincRNA	2.58744	0.0890887	3.725	3.91567	2.28153	3.49177	3.26158	4.34493	3.19117	3.65708	1.23905	3.51511	2.96198	3.31151	1.16222	0.686965	-0.310629	1.31152	1.84927	2.94096	0.918001	1.88736	0.479963
ENSG00000263916	-0.669547	0.00375792	RP11-110H1.4	sense_intronic	-1.00167	-1.16145	-2.71056	-2.95469	-0.687352	-2.61116	-1.06229	-1.19633	-1.70254	-3.46482	-1.17856	-2.02962	-1.59168	-1.56623	-1.52228	-6.25555	-1.95833	-3.50611	-1.24961	-1.07564	-0.64073	-2.67742	-0.85564
ENSG00000267152	1.12284	0.00376411	CTD-2528L19.6	lincRNA	-0.574244	-6.01944	1.01433	0.215233	-2.87498	0.352309	-2.02382	0.733771	0.0212469	0.927494	-3.50049	2.1938	0.461958	0.329072	-3.59267	0.614815	-1.77775	-5.82803	-2.21114	-0.621078	-3.04283	0.261179	-0.604102
ENSG00000248714	0.695835	0.0037762	RP11-1079K10.3	lincRNA	-0.367793	-1.37558	0.050253	-0.483386	-0.759502	0.537227	-0.00496091	0.133378	-1.70254	-0.341441	-0.753251	-0.483652	-1.27852	-0.482166	-2.0077	-0.42266	-3.05786	-0.40177	-0.230249	0.191836	-5.85018	-1.45503	-2.07803
ENSG00000230400	1.11753	0.00379622	RP11-359G22.2	lincRNA	-2.15921	-6.01944	-1.23663	1.38678	-1.79698	1.32115	-0.205658	-0.475043	1.78054	1.4073	-3.50049	2.13709	0.941355	-1.35211	-2.21416	0.430951	-3.05786	-2.1276	-3.65171	0.146748	-5.85018	0.261179	-1.34107
ENSG00000204623	0.754438	0.0038014	ZNRD1-AS1	antisense	1.68725	1.72876	4.43806	4.08073	2.94094	5.22552	2.13339	4.45142	4.7663	4.7578	0.852031	5.46319	4.38421	1.46939	0.0626849	3.63167	2.02353	2.42463	1.93754	3.61448	1.8433	4.22546	2.02817
ENSG00000235445	0.881297	0.00384481	XXbac-B476C20.14	sense_intronic	-5.85965	-6.01944	-2.71056	-2.02181	-6.0449	-2.43059	-3.46439	-3.23586	-5.16197	-1.87986	-6.30784	-2.97304	-3.46615	-6.21009	-5.91459	-6.25555	-5.86522	-2.1276	-3.65171	-1.18668	-5.85018	-4.26238	-5.24796
ENSG00000231927	0.773379	0.0038494	AC102953.6	antisense	-1.95276	-6.01944	-3.55856	-2.71368	-4.45994	-3.34813	-6.27175	-2.49889	-2.49901	-3.46482	-6.30784	-2.97304	-3.82872	-3.04016	-3.59267	-6.25555	-5.86522	-2.65811	-4.13714	-2.3711	-2.68026	-2.38791	-5.24796
ENSG00000254343	0.840965	0.00385331	RP11-760H22.2	lincRNA	-3.53772	-6.01944	-2.71056	-2.50723	-6.0449	-2.81762	-6.27175	-3.59843	-1.79274	-6.27218	-6.30784	-3.50355	-3.46615	-2.3032	-2.74467	-4.67059	-5.86522	-3.02068	-6.45907	-3.5086	-5.85018	-2.67742	-5.24796
ENSG00000229980	0.833193	0.00385502	TOB1-AS1	processed_transcript	0.0229967	0.247351	-0.388631	-0.224299	0.39804	0.302124	-0.914195	0.252431	-0.0604369	0.0316027	-2.05991	0.545692	-1.68188	-0.428727	-1.66667	-0.763697	-1.4729	-1.18418	-1.10152	0.883714	-5.85018	0.691813	-5.24796
ENSG00000254554	-0.961851	0.00388732	RP11-351I24.1	antisense	-1.95276	-0.0886984	-3.07313	-3.60677	-1.65259	-6.51806	-1.14246	-6.40578	-3.57701	-6.27218	-1.78428	-3.86612	-2.38815	-3.40273	-3.10724	-6.25555	-3.05786	-2.3686	-2.06675	-3.02318	-5.85018	-5.84735	-2.4406
ENSG00000223891	0.593855	0.00389397	OSER1-AS1	lincRNA	-0.367793	-0.527583	-0.388631	1.82905	0.183915	1.29573	0.716937	-0.256034	1.30291	1.34987	-0.33056	2.22437	-1.68188	0.732428	0.235152	1.02057	-1.11033	0.36179	-0.4367	0.677263	-1.0953	1.96644	-0.389977
ENSG00000236936	-0.946657	0.00392604	RP3-329E20.2	antisense	-5.85965	-2.319	-4.29552	-6.41412	-1.52134	-6.51806	-4.68678	-6.40578	-6.74694	-6.27218	-3.50049	-6.67348	-6.63607	-6.21009	-5.91459	-6.25555	-1.34166	-5.82803	-3.65171	-5.83053	-5.85018	-3.03999	-1.34107
ENSG00000259884	-1.00514	0.00394084	RP11-1100L3.8	lincRNA	3.27734	1.48041	1.53737	-0.581233	3.55687	-2.27013	3.28476	-0.383413	2.69393	-0.914626	3.51074	-0.52373	3.69148	3.74847	1.72203	3.0229	5.18122	0.36179	-0.904479	0.100206	1.74227	0.894121	3.12273
ENSG00000260790	-0.932987	0.00395864	RP11-21M24.2	antisense	-4.27468	-1.16145	-5.88048	-4.82916	-4.45994	-4.93309	-6.27175	-6.40578	-0.914047	-4.68722	-4.72288	-6.67348	-5.05111	-4.62512	-0.48833	-6.25555	-3.54329	-3.50611	-0.786643	-4.24557	-3.52826	-5.84735	-5.24796
ENSG00000258857	0.862459	0.00398998	RP11-247L20.3	lincRNA	-3.53772	-2.84951	-3.07313	-1.55614	-2.13801	-2.12574	-6.27175	-2.01346	-6.74694	-1.62832	-3.50049	-1.46402	-3.46615	-2.3032	-3.59267	-1.50066	-3.54329	-2.65811	-2.21114	-1.74307	-5.85018	-5.84735	-5.24796
ENSG00000203593	-0.788375	0.00400551	RP5-1096D14.6	antisense	-5.85965	-0.238076	-4.29552	-6.41412	-3.23755	-6.51806	-3.94982	-6.40578	-3.93958	-6.27218	-4.72288	-6.67348	-6.63607	-6.21009	-5.91459	-6.25555	-5.86522	-5.82803	-3.65171	-5.83053	-5.85018	-5.84735	-5.24796
ENSG00000265786	0.819967	0.00401412	RP11-527H14.6	lincRNA	0.117634	-6.01944	-2.42105	-0.632764	-1.18692	0.111301	-1.87943	-3.23586	-3.28751	-0.544258	-2.84841	-2.28116	-3.46615	-2.3032	-3.10724	-1.30135	-4.28026	-1.18418	-0.309321	0.00235828	-2.68026	-2.38791	-3.663
ENSG00000271997	-1.12003	0.00404469	RP11-97O12.6	sense_intronic	-5.85965	-1.77151	-5.88048	-6.41412	-6.0449	-6.51806	-6.27175	-6.40578	-6.74694	-6.27218	-2.05991	-6.67348	-6.63607	-6.21009	-0.24217	-6.25555	-3.05786	-2.1276	-0.576425	-5.83053	-5.85018	-5.84735	-0.724396
ENSG00000248719	-0.989151	0.00409567	RP11-377G16.2	antisense	-1.00167	-0.291515	-2.42105	-6.41412	-1.65259	-6.51806	-2.18428	-3.59843	-3.57701	-6.27218	-2.40095	-4.35155	-4.31415	-1.81777	-3.10724	-6.25555	-1.61729	-2.1276	-0.844358	-5.83053	-1.45787	-2.67742	-1.54752
ENSG00000232072	0.877728	0.00411044	AC004901.1	processed_transcript	-4.27468	-6.01944	-2.42105	-1.20467	-3.72298	-3.34813	-6.27175	-6.40578	-6.74694	-2.57174	-6.30784	-1.46402	-2.54861	-1.81777	-4.32963	-3.93362	-5.86522	-5.82803	-6.45907	-4.24557	-5.85018	-5.84735	-5.24796
ENSG00000254833	0.915145	0.00413109	RP11-50B3.2	lincRNA	-2.15921	-6.01944	-5.88048	-2.71368	-6.0449	-2.61116	-6.27175	-2.31832	-6.74694	-3.46482	-6.30784	-2.76659	-2.72918	-2.50965	-5.91459	-2.55511	-3.05786	-5.82803	-6.45907	-5.83053	-3.04283	-2.67742	-5.24796
ENSG00000239569	2.33137	0.0041331	KMT2E-AS1	antisense	-5.85965	-6.01944	2.92365	3.33239	-6.0449	-6.51806	-6.27175	3.11189	-6.74694	3.17284	-6.30784	-5.08851	-6.63607	-6.21009	-5.91459	3.62862	-5.86522	-5.82803	-6.45907	4.05058	-5.85018	3.5342	3.72646
ENSG00000230730	-0.710999	0.00416555	AC074011.2	antisense	-3.53772	-2.11255	-3.55856	-6.41412	-3.23755	-6.51806	-3.94982	-6.40578	-5.16197	-3.95025	-3.13792	-5.08851	-3.82872	-6.21009	-4.32963	-3.93362	-2.40579	-3.02068	-3.65171	-5.83053	-4.26522	-5.84735	-3.663
ENSG00000180458	1.19491	0.00419001	CTD-3064H18.4	antisense	-0.574244	-6.01944	-1.79302	1.13277	-3.23755	-0.042322	-0.0819229	-3.23586	-6.74694	-0.657468	-2.6074	-1.8155	-2.93563	-6.21009	-5.91459	-2.00762	-3.05786	-1.58011	-6.45907	0.0521113	0.258341	-0.421081	-5.24796
ENSG00000228923	-0.787838	0.00421026	AP000355.2	antisense	-1.00167	-0.890153	-1.79302	-3.60677	-0.0676241	-2.61116	-1.74819	-3.59843	-3.28751	-2.36529	-0.635415	-6.67348	-1.77809	-0.783822	-2.0077	-4.67059	-0.735935	-2.3686	-0.844358	-2.3711	-1.45787	-3.03999	-1.54752
ENSG00000251438	0.727054	0.00421076	RP11-431M7.2	antisense	-2.68972	-6.01944	-5.88048	-3.60677	-6.0449	-4.19613	-6.27175	-4.08385	-6.74694	-3.95025	-6.30784	-4.35155	-6.63607	-6.21009	-5.91459	-3.93362	-5.86522	-5.82803	-6.45907	-3.02318	-5.85018	-5.84735	-2.92603
ENSG00000212978	-0.610256	0.00422068	AC016747.3	processed_transcript	-0.187221	1.32929	-2.18004	-0.859534	0.221883	-1.38877	-0.294468	-2.94635	-0.914047	-0.717589	0.562525	-1.11889	1.72587	-1.68652	-0.186675	-1.21116	-1.95833	-0.542633	-0.677708	-0.972551	1.16104	0.381473	0.0374445
ENSG00000247572	0.674958	0.00424764	CKMT2-AS1	antisense	0.881821	0.748749	1.6509	2.91006	1.54755	3.63042	2.67954	2.24886	1.69185	2.97812	0.0320099	3.89922	2.96941	1.59081	0.193929	2.56782	-1.00724	0.475746	1.02475	1.71636	-1.32662	2.45186	1.46629
ENSG00000261341	-0.676259	0.00425298	CTD-2568A17.1	lincRNA	-2.40021	-2.319	-3.55856	-2.95469	-0.372479	-3.05862	-3.10182	-3.23586	-4.42501	-3.10225	-2.40095	-4.35155	-2.24376	-3.04016	-0.629193	-2.55511	-0.0838581	-3.02068	-1.60109	-2.66061	-1.0953	-4.26238	-1.16049
ENSG00000257740	0.622174	0.00427039	RP11-977G19.12	antisense	-2.15921	-2.56	-2.42105	-2.1662	-2.34446	-0.289237	-1.31755	-1.04823	-1.79274	-0.341441	-3.98591	-1.05877	-1.88119	-1.96216	-3.10724	-1.73199	-3.54329	-1.58011	-2.99964	-1.74307	-1.60226	-1.94046	-5.24796
ENSG00000255650	-1.11614	0.00433057	FAM222A-AS1	antisense	-1.95276	-6.01944	-4.29552	-3.60677	-1.18692	-6.51806	-1.31755	-3.59843	-2.35462	-3.10225	-0.69313	-3.50355	-1.77809	-3.40273	-0.785312	-6.25555	1.97399	-0.542633	-2.06675	-2.66061	0.453597	-2.67742	0.634685
ENSG00000255240	0.741069	0.0043338	RP11-142C4.6	antisense	-0.502094	-0.404726	0.22804	-0.147337	-3.23755	-0.251269	-0.599322	0.223576	-1.46154	0.170765	-2.22038	-2.58601	-0.908154	-0.428727	-1.66667	0.344363	-2.40579	-1.30447	-2.37161	-1.18668	-5.85018	0.218743	-0.389977
ENSG00000228389	0.588734	0.00441775	AC068039.4	antisense	1.35952	-0.527583	0.0967955	1.42508	-2.13801	1.72512	1.72261	1.20155	-1.61765	2.07212	-0.47495	0.794129	-0.753431	-0.232806	-0.705142	1.506	0.438563	0.321712	0.199144	-0.158106	0.62555	0.752567	1.05582
ENSG00000226125	0.801442	0.00441874	AC098823.3	lincRNA	0.854599	-3.21208	-2.18004	-2.71368	-1.79698	-0.963467	-1.14246	-1.5478	-3.28751	-1.06272	-2.6074	-2.14991	-1.50679	-2.50965	-4.32963	-0.47419	-5.86522	-1.74057	-2.21114	-1.74307	-5.85018	-1.75988	-2.4406
ENSG00000228554	-0.811184	0.00446716	AC004837.5	antisense	2.38353	1.49626	-0.522932	2.1443	5.38607	1.56409	3.57531	-1.04823	-0.0887259	2.2553	3.52347	0.292307	-0.261035	-0.0202618	2.27028	-0.583124	1.89633	0.614909	2.23093	0.319215	2.63766	-0.802952	2.00943
ENSG00000204055	0.932771	0.00447494	RP11-247A12.2	antisense	-5.85965	-3.69751	-3.07313	-1.89056	-6.0449	-1.99449	-6.27175	-1.76192	-3.28751	-2.57174	-3.50049	-1.8155	-6.63607	-3.40273	-5.91459	-1.73199	-1.77775	-3.02068	-6.45907	-2.3711	-2.14974	-0.718063	-2.4406
ENSG00000273007	0.929317	0.00448674	RP11-170N16.3	antisense	-3.05229	-6.01944	-2.42105	-2.71368	-3.23755	-3.7107	-3.46439	-1.36139	-6.74694	-2.81275	-6.30784	-1.46402	-2.24376	-1.56623	-5.91459	-1.86323	-3.05786	-5.82803	-3.65171	-1.74307	-5.85018	-5.84735	-5.24796
ENSG00000226852	1.04213	0.00454569	RP1-212P9.2	lincRNA	-1.95276	-0.0886984	-2.18004	-1.65924	-2.87498	-1.99449	-3.46439	0.164075	-1.25508	-1.31798	-6.30784	-1.11889	-6.63607	-2.75065	-5.91459	-3.44819	-4.28026	-5.82803	-6.45907	-0.338679	-2.39075	-1.94046	-5.24796
ENSG00000259932	0.871015	0.00455695	CTD-2651B20.7	sense_intronic	-3.05229	-6.01944	-4.29552	-2.02181	-6.0449	-2.43059	-2.57131	-2.94635	-6.74694	-1.62832	-3.50049	-3.50355	-6.63607	-3.40273	-5.91459	-1.73199	-3.05786	-5.82803	-3.65171	-2.3711	-5.85018	-3.03999	-2.4406
ENSG00000260723	0.628426	0.0046256	RP11-165M1.2	sense_intronic	-0.815252	-4.43447	-1.79302	-1.65924	-2.58547	-1.76317	-2.57131	0.851607	-2.49901	-0.845913	-1.66398	-1.38807	-1.35067	-2.50965	-1.66667	-0.763697	-3.54329	-1.30447	-1.93551	0.235557	-1.60226	-0.489794	-1.16049
ENSG00000272472	0.758476	0.00465559	RP11-95G17.2	lincRNA	-3.05229	-6.01944	-1.48817	-3.60677	-6.0449	-6.51806	-6.27175	-3.59843	-6.74694	-6.27218	-6.30784	-3.86612	-6.63607	-6.21009	-5.91459	-2.55511	-5.86522	-5.82803	-6.45907	-5.83053	-5.85018	-5.84735	-5.24796
ENSG00000250252	0.772449	0.00466532	RP11-342A1.1	lincRNA	-5.85965	-6.01944	-5.88048	-6.41412	-6.0449	-1.3086	-6.27175	-2.49889	-6.74694	-3.10225	-6.30784	-6.67348	-6.63607	-4.62512	-5.91459	-3.44819	-5.86522	-3.50611	-6.45907	-5.83053	-5.85018	-5.84735	-5.24796
ENSG00000271771	0.836253	0.00466782	RP11-1250I15.3	lincRNA	-5.85965	-6.01944	-2.42105	-1.45993	-6.0449	-3.7107	-6.27175	-2.70534	-6.74694	-2.81275	-6.30784	-6.67348	-3.82872	-6.21009	-5.91459	-3.44819	-5.86522	-5.82803	-6.45907	-3.02318	-5.85018	-5.84735	-5.24796
ENSG00000228705	-0.818368	0.00467453	LINC00659	antisense	-2.15921	-1.49587	-4.29552	-6.41412	-4.45994	-6.51806	-6.27175	-6.40578	-4.42501	-4.68722	-2.6074	-6.67348	-3.82872	-6.21009	-3.10724	-6.25555	-5.86522	-5.82803	-3.28914	-5.83053	-5.85018	-5.84735	-2.4406
ENSG00000266957	0.688363	0.00468077	RP11-49K24.4	antisense	-4.27468	-6.01944	-3.55856	-4.0922	-6.0449	-3.34813	-3.10182	-3.23586	-4.42501	-2.02425	-6.30784	-3.86612	-4.31415	-2.75065	-5.91459	-6.25555	-5.86522	-3.50611	-3.28914	-3.02318	-4.26522	-3.52542	-5.24796
ENSG00000257226	0.750689	0.00475539	CTD-2252P21.1	antisense	-1.61172	-1.77151	-0.671031	-0.581233	-6.0449	-2.81762	-1.87943	0.362404	-3.28751	-0.389535	-3.98591	-2.02962	-3.17664	-1.56623	-2.0077	-1.12627	-2.40579	-0.970054	-1.50487	-1.43821	-3.04283	-0.89315	0.0374445
ENSG00000235021	0.767349	0.00476039	RP11-439E19.7	lincRNA	-3.53772	-6.01944	-3.55856	-2.50723	-6.0449	-3.05862	-3.46439	-6.40578	-2.35462	-2.36529	-3.50049	-3.21405	-5.05111	-4.62512	-5.91459	-3.93362	-5.86522	-3.02068	-6.45907	-3.02318	-5.85018	-3.52542	-5.24796
ENSG00000268401	0.815551	0.00477312	CTC-344H19.4	lincRNA	-5.85965	-6.01944	-2.18004	-3.2442	-4.45994	-1.66007	-3.94982	-2.94635	-2.49901	-2.57174	-3.98591	-2.28116	-6.63607	-3.04016	-3.10724	-3.44819	-5.86522	-5.82803	-4.13714	-1.5826	-5.85018	-2.38791	-5.24796
ENSG00000229192	0.866703	0.00478481	AC004870.3	lincRNA	-3.05229	-6.01944	-1.97359	-1.45993	-3.72298	-4.19613	-2.36486	-6.40578	-6.74694	-3.95025	-6.30784	-2.76659	-5.05111	-1.35211	-5.91459	-3.44819	-5.86522	-5.82803	-6.45907	-3.5086	-5.85018	-5.84735	-5.24796
ENSG00000229679	-0.836576	0.00479909	AC007327.5	antisense	-5.85965	-3.69751	-5.88048	-6.41412	-3.23755	-3.7107	-6.27175	-6.40578	-6.74694	-6.27218	-2.40095	-6.67348	-6.63607	-6.21009	-1.52228	-6.25555	-5.86522	-5.82803	-2.99964	-5.83053	-2.39075	-5.84735	-5.24796
ENSG00000234722	0.908058	0.00482963	AC073236.3	lincRNA	-1.77218	-1.49587	-0.595082	-0.483386	-6.0449	-4.19613	-0.543827	-0.733355	-5.16197	-0.544258	-2.6074	-0.134318	-2.38815	-0.924684	-1.82713	-0.47419	-5.86522	-2.1276	-2.55218	-2.13009	-3.04283	-1.75988	-2.92603
ENSG00000258268	0.705629	0.00484159	RP11-570L15.1	antisense	-1.61172	-2.11255	-0.388631	-2.1662	-4.45994	-0.736696	-1.22735	-1.45158	-1.99205	-1.62832	-2.22038	-0.564952	-1.02136	-1.35211	-3.59267	-0.897998	-4.28026	-2.65811	-1.41467	-0.701249	-5.85018	-1.59942	-2.4406
ENSG00000236810	0.638213	0.00484951	RP5-886K2.3	antisense	-3.05229	-2.84951	-0.0475944	0.215233	-1.79698	0.55876	-0.717159	0.102014	0.875114	-0.206089	-1.55295	0.06799	-0.753431	0.0936944	-1.15971	-0.583124	-1.95833	-0.40177	-1.70418	-0.621078	-2.68026	0.302401	-3.663
ENSG00000258457	0.748155	0.00486367	RP11-298I3.4	antisense	-1.33608	-6.01944	-0.325896	-1.45993	-0.687352	-0.495688	-1.74819	-0.475043	-1.79274	-0.657468	-2.05991	-0.230533	-1.35067	-1.96216	-3.59267	-2.34866	-5.86522	-2.65811	-2.75863	-1.18668	-2.14974	-1.32378	-2.07803
ENSG00000212939	1.09839	0.00489995	RP1-29C18.10	antisense	-0.0267564	-6.01944	0.62731	1.29324	0.641597	2.99172	1.14611	0.774128	0.0732415	0.646685	-1.66398	0.991859	0.831532	-0.537661	-5.91459	-2.00762	-3.05786	-1.30447	-0.967215	-0.102611	-5.85018	-0.489794	-1.54752
ENSG00000235824	-0.662941	0.00490025	LINC00837	lincRNA	-5.85965	-6.01944	-4.29552	-6.41412	-3.23755	-6.51806	-4.68678	-6.40578	-4.42501	-6.27218	-3.50049	-6.67348	-3.82872	-6.21009	-5.91459	-6.25555	-5.86522	-5.82803	-6.45907	-5.83053	-5.85018	-5.84735	-2.4406
ENSG00000261572	-1.49474	0.00491986	RP11-384L8.1	sense_intronic	-5.85965	0.456298	-0.751201	-6.41412	0.39804	-6.51806	-0.34101	-6.40578	-1.99205	-6.27218	-6.30784	-6.67348	-6.63607	-0.143997	-0.785312	-6.25555	-5.86522	-5.82803	0.386422	-5.83053	1.22663	-1.20349	-0.724396
ENSG00000229664	-0.958509	0.00492148	RP11-536K7.5	antisense	-0.187221	-0.136793	-2.18004	-3.60677	1.3388	-3.7107	-2.18428	-4.08385	-1.25508	-6.27218	-0.425197	-1.00105	0.13211	-3.88816	-3.59267	-1.86323	0.243307	-2.3686	-2.37161	-5.83053	-2.39075	-3.03999	-3.663
ENSG00000255119	-0.845358	0.00497033	RP11-655M14.12	antisense	-5.85965	-2.56	-5.88048	-6.41412	-6.0449	-6.51806	-6.27175	-6.40578	-5.16197	-3.46482	-4.72288	-6.67348	-6.63607	-6.21009	-1.39103	-6.25555	-3.05786	-5.82803	-6.45907	-5.83053	-2.39075	-5.84735	-2.4406
ENSG00000253230	-1.03652	0.00497252	LINC00599	lincRNA	-3.05229	-1.16145	-5.88048	-6.41412	-2.34446	-3.7107	-1.41377	-6.40578	-6.74694	-6.27218	-0.52648	-6.67348	-3.82872	-6.21009	-5.91459	-6.25555	-1.00724	-5.82803	-6.45907	-3.02318	-2.14974	-5.84735	-5.24796
ENSG00000272690	0.655308	0.00505577	RP11-803B1.8	lincRNA	-3.05229	-6.01944	-2.71056	-0.305599	-2.58547	-0.903346	-2.18428	-2.49889	-2.49901	-1.1429	-3.98591	-1.11889	-1.50679	-1.4552	-3.10724	-0.700961	-3.05786	-1.30447	-1.0328	-1.43821	-2.68026	-1.75988	-2.4406
ENSG00000230945	0.904559	0.00507807	RP11-394O9.1	lincRNA	-2.68972	-3.69751	-2.18004	-2.71368	-6.0449	-1.99449	-6.27175	-4.08385	-4.42501	-2.02425	-6.30784	-1.8155	-2.93563	-6.21009	-5.91459	-6.25555	-5.86522	-1.92114	-2.99964	-1.30697	-5.85018	-5.84735	-5.24796
ENSG00000266495	-0.926871	0.00509771	RP11-17J14.2	antisense	-3.53772	-2.84951	-2.71056	-0.92227	0.800586	-2.81762	-0.657038	-4.82082	-2.65947	-3.95025	1.34321	-6.67348	-0.332293	-1.00063	-1.27074	-1.12627	-3.05786	-2.65811	-1.70418	-4.24557	-2.68026	-2.38791	-0.724396
ENSG00000236514	0.672286	0.00510389	RP11-162G10.5	antisense	-1.61172	-4.43447	-1.0225	-0.581233	-0.759502	-1.1605	-0.657038	-0.256034	-0.337546	-0.206089	-2.05991	-0.790834	-0.753431	-0.595377	-3.10724	-0.147025	-2.69529	-2.1276	-2.75863	-0.786138	-2.14974	-1.09246	-5.24796
ENSG00000260022	0.610864	0.00511637	LA16c-306A4.1	antisense	-0.815252	-3.21208	-1.35692	-1.20467	-0.835451	-0.214275	-1.62789	-1.04823	-1.70254	-1.74862	-0.52648	0.977575	-0.446249	-0.143997	-1.66667	-0.700961	-3.54329	-0.783641	-2.37161	-1.92364	-3.04283	-0.802952	-3.663
ENSG00000240050	0.660387	0.00515478	RP1-93H18.1	lincRNA	-1.95276	-1.93197	-1.63256	-1.45993	-2.87498	-1.76317	-2.57131	-1.76192	-2.10308	-0.780325	-2.84841	-1.00105	-2.72918	-1.35211	-1.05661	-1.39757	-2.69529	-3.50611	-2.99964	-2.3711	-5.85018	-1.20349	-5.24796
ENSG00000255856	0.697379	0.00516302	RP11-87C12.5	lincRNA	-1.95276	-3.21208	-0.926288	0.969581	0.294946	1.33369	-0.543827	0.605446	-0.8162	1.17903	-1.17856	0.0947074	-2.72918	-1.4552	-0.960399	-0.47419	-3.54329	-1.92114	-1.41467	0.798825	-2.14974	-0.802952	-0.85564
ENSG00000233110	-0.877188	0.00516516	RP11-301L8.2	antisense	-5.85965	-1.16145	-5.88048	-6.41412	-6.0449	-6.51806	-2.36486	-6.40578	-6.74694	-6.27218	-3.50049	-6.67348	-2.93563	-6.21009	-5.91459	-6.25555	-2.16478	-5.82803	-6.45907	-5.83053	-5.85018	-3.03999	-2.92603
ENSG00000254528	-0.839608	0.00518206	RP11-728F11.4	antisense	-5.85965	-2.84951	-5.88048	-6.41412	-2.34446	-6.51806	-6.27175	-6.40578	-3.93958	-6.27218	-6.30784	-6.67348	-3.82872	-3.04016	-5.91459	-6.25555	-3.05786	-5.82803	-2.55218	-4.24557	-5.85018	-5.84735	-2.07803
ENSG00000267571	0.717783	0.00518304	AC104532.4	antisense	0.369172	-6.01944	0.459366	0.843265	0.430829	0.493172	0.103292	0.692251	0.0732415	0.739049	-1.26345	0.842223	0.209416	0.297708	-2.0077	-0.763697	-1.61729	-0.618581	-0.626178	0.00235828	-1.60226	-0.421081	-1.16049
ENSG00000270883	-0.742916	0.00520119	RP11-461L13.5	lincRNA	-5.85965	-6.01944	-5.88048	-6.41412	-6.0449	-6.51806	-6.27175	-6.40578	-6.74694	-6.27218	-3.50049	-6.67348	-3.82872	-3.88816	-3.10724	-6.25555	-2.16478	-5.82803	-3.65171	-5.83053	-5.85018	-5.84735	-2.4406
ENSG00000231528	-1.08475	0.00520645	FAM225A	lincRNA	-5.85965	-2.84951	-5.88048	-6.41412	-1.65259	-3.7107	-3.46439	-4.08385	-6.74694	-6.27218	-1.02244	-6.67348	-1.68188	-6.21009	-0.360006	-3.44819	-2.16478	-1.43572	-1.60109	-3.02318	-3.52826	-1.59942	0.0374445
ENSG00000247934	0.791973	0.00525834	RP11-967K21.1	antisense	-0.574244	-2.11255	-0.83609	0.155732	-0.553051	0.830673	-0.490388	-1.12038	-1.19235	0.0316027	-3.50049	-0.564952	-0.908154	-0.482166	-1.82713	-1.86323	-1.61729	-2.65811	-1.93551	-0.786138	-5.85018	-0.0659862	-5.24796
ENSG00000226320	0.78167	0.00527285	AC018359.1	lincRNA	-4.27468	-6.01944	-2.71056	-4.0922	-6.0449	-2.61116	-3.46439	-3.23586	-6.74694	-2.57174	-6.30784	-6.67348	-6.63607	-4.62512	-5.91459	-3.08562	-5.86522	-3.02068	-4.13714	-3.5086	-5.85018	-5.84735	-2.92603
ENSG00000256360	0.806049	0.00532668	RP11-707G14.7	lincRNA	-5.85965	-6.01944	-4.29552	-2.02181	-3.23755	-2.27013	-2.36486	-1.65089	-2.10308	-3.46482	-6.30784	-2.42555	-2.72918	-3.40273	-5.91459	-3.08562	-5.86522	-3.02068	-4.13714	-2.66061	-5.85018	-1.59942	-5.24796
ENSG00000233891	0.698133	0.00533058	AC007131.2	lincRNA	-5.85965	-6.01944	-3.55856	-2.50723	-6.0449	-3.34813	-3.46439	-4.82082	-3.93958	-4.68722	-6.30784	-3.50355	-3.82872	-4.62512	-5.91459	-2.34866	-5.86522	-3.50611	-6.45907	-3.02318	-5.85018	-5.84735	-5.24796
ENSG00000273075	0.956718	0.00533632	RP11-122G18.8	lincRNA	-3.05229	-6.01944	-1.63256	-6.41412	-6.0449	-2.43059	-2.57131	-6.40578	-6.74694	-1.87986	-6.30784	-1.18162	-2.93563	-3.40273	-5.91459	-6.25555	-5.86522	-5.82803	-6.45907	-1.43821	-5.85018	-2.38791	-5.24796
ENSG00000196951	0.933388	0.00535276	RP11-425I13.3	antisense	-3.05229	-2.319	-0.208059	1.06969	-2.34446	0.168445	0.73948	1.54259	-0.0887259	0.62264	-2.22038	0.221341	-0.658794	0.0936944	-0.705142	1.21206	-5.86522	-3.02068	-4.13714	-0.102611	-3.04283	0.456435	-0.604102
ENSG00000236756	0.675658	0.00538249	DNAJC9-AS1	antisense	-0.90545	-1.49587	0.050253	-1.20467	-6.0449	-0.251269	-0.205658	0.942947	-0.239143	-1.62832	-2.6074	-0.790834	-2.11251	-0.143997	-2.0077	0.048231	-2.16478	-0.698752	-0.677708	-0.972551	-1.60226	-0.232636	-1.34107
ENSG00000248150	-0.802957	0.00543469	RP1-167G20.1	lincRNA	-2.40021	-2.56	-5.88048	-3.60677	-2.13801	-3.34813	-4.68678	-3.59843	-3.93958	-3.95025	-2.84841	-6.67348	-4.31415	-6.21009	-3.59267	-6.25555	-2.40579	-5.82803	-1.93551	-5.83053	-5.85018	-5.84735	-2.4406
ENSG00000225177	0.732319	0.00543844	RP11-390P2.4	antisense	1.52406	0.130311	0.62731	1.56887	1.1935	1.04419	0.805068	1.43342	0.432972	1.32028	0.406405	1.22739	-0.908154	0.199305	-1.15971	0.153841	-5.86522	1.16065	1.11836	1.90418	-0.992202	0.129934	-0.389977
ENSG00000230550	-0.956174	0.00551052	RP11-74C13.3	antisense	-2.40021	-3.69751	-5.88048	-4.82916	-0.687352	-6.51806	-3.10182	-6.40578	-3.93958	-3.95025	-3.13792	-6.67348	-5.05111	-3.04016	-5.91459	-6.25555	-1.77775	-5.82803	-6.45907	-5.83053	-1.0953	-5.84735	-2.07803
ENSG00000242798	0.665652	0.00552578	RP11-506M12.1	antisense	-0.815252	-1.93197	-1.0225	-1.20467	-2.58547	0.327435	-1.51686	-0.572891	-1.79274	0.357179	-1.35364	-0.607388	-2.93563	-0.655498	-5.91459	-0.829285	-2.69529	-1.74057	-1.0328	-1.07564	-0.235473	-1.94046	-1.34107
ENSG00000253125	-1.08874	0.00556978	RP11-459E5.1	processed_transcript	-4.27468	-1.06524	-5.88048	-6.41412	0.800586	-6.51806	-6.27175	-3.59843	-3.93958	-6.27218	-1.91552	-6.67348	-6.63607	-1.96216	-0.705142	-6.25555	-1.4729	-3.02068	-1.93551	-5.83053	-4.26522	-5.84735	-5.24796
ENSG00000228526	0.8114	0.005668	RP3-510D11.1	lincRNA	-1.95276	-6.01944	-2.42105	-2.32666	-6.0449	-3.34813	-3.46439	-6.40578	-6.74694	-3.95025	-6.30784	-3.50355	-6.63607	-2.75065	-5.91459	-3.08562	-3.05786	-3.02068	-3.65171	-5.83053	-5.85018	-5.84735	-5.24796
ENSG00000261189	-0.972775	0.00569585	RP3-512B11.3	antisense	-3.05229	-6.01944	-5.88048	-6.41412	-1.00051	-6.51806	-0.779894	-6.40578	-6.74694	-6.27218	-6.30784	-6.67348	-3.17664	-6.21009	-3.10724	-6.25555	-2.16478	-5.82803	-6.45907	-5.83053	-5.85018	-5.84735	-2.4406
ENSG00000238113	1.02473	0.00571969	RP11-262H14.1	lincRNA	0.679512	0.209383	1.53737	4.77879	2.50584	2.46779	0.761676	1.57721	2.57273	2.764	0.680845	2.99008	2.34407	0.778598	-1.52228	2.54858	-3.05786	0.149245	-0.677708	-0.54513	-5.85018	2.65648	-0.604102
ENSG00000204277	-0.845784	0.00573967	RP11-219G17.4	lincRNA	-1.61172	-3.21208	-4.29552	-3.60677	-1.09071	-4.93309	-0.657038	-4.08385	-3.93958	-6.27218	-1.91552	-3.86612	-2.38815	-6.21009	-4.32963	-6.25555	-5.86522	-5.82803	-3.28914	-3.5086	-2.14974	-3.03999	-1.54752
ENSG00000237604	0.60543	0.00575201	AP001056.1	lincRNA	-1.77218	-1.49587	-1.35692	0.952199	-0.0676241	1.96978	-1.22735	0.754091	-0.518119	1.44892	-0.285472	0.0130236	-0.19313	-0.537661	-1.82713	-0.897998	-1.61729	-0.698752	-1.50487	0.00235828	-1.76272	-0.174921	-2.92603
ENSG00000272934	-0.780545	0.00576298	RP11-392E22.10	processed_transcript	-5.85965	-6.01944	-5.88048	-6.41412	-6.0449	-6.51806	-6.27175	-6.40578	-2.65947	-6.27218	-6.30784	-6.67348	-1.68188	-4.62512	-5.91459	-6.25555	-2.69529	-5.82803	-3.28914	-5.83053	-5.85018	-5.84735	-2.4406
ENSG00000234650	0.880992	0.00590604	PCCA-AS1	antisense	-3.53772	-3.69751	-1.1256	-1.28484	-3.23755	-1.3086	-1.74819	-4.82082	-2.84005	-1.62832	-6.30784	-1.46402	-3.17664	-2.50965	-3.10724	-3.44819	-5.86522	-5.82803	-6.45907	-2.13009	-5.85018	-1.75988	-5.24796
ENSG00000231485	0.782739	0.005912	RP4-535B20.1	lincRNA	-2.15921	-6.01944	-2.18004	-3.2442	-2.34446	-3.34813	-1.22735	-2.01346	-3.28751	-2.36529	-6.30784	-2.58601	-3.46615	-3.04016	-3.10724	-2.55511	-3.54329	-3.50611	-6.45907	-1.74307	-5.85018	-3.52542	-5.24796
ENSG00000267348	0.716573	0.00594256	CTB-179K24.3	antisense	-2.68972	-1.77151	-1.1256	-1.45993	-2.87498	-0.042322	-3.10182	-1.12038	-2.10308	-0.914626	-1.35364	-0.892117	-1.42662	-1.00063	-4.32963	-2.55511	-1.95833	-1.07315	-6.45907	-0.621078	-2.14974	-2.67742	-2.92603
ENSG00000203999	-0.765603	0.0059774	RP11-290F20.1	lincRNA	-5.85965	-0.809982	-5.88048	-6.41412	-6.0449	-6.51806	-3.46439	-6.40578	-6.74694	-6.27218	-3.50049	-3.86612	-5.05111	-6.21009	-3.10724	-6.25555	-5.86522	-5.82803	-2.75863	-5.83053	-5.85018	-5.84735	-5.24796
ENSG00000225106	-1.00421	0.00598095	RP11-429E11.2	antisense	-2.40021	-0.890153	-5.88048	-2.95469	-1.00051	-1.8742	0.0320333	-0.475043	-1.07451	-2.81275	-1.02244	-6.67348	-2.93563	-3.40273	0.95577	-0.47419	2.05959	-0.470483	1.92031	-0.049172	-1.32662	0.492504	1.19499
ENSG00000226883	0.8321	0.00602385	RP4-782L23.2	antisense	-2.15921	-6.01944	-4.29552	-4.82916	-4.45994	-2.61116	-2.02382	-3.59843	-6.74694	-2.81275	-6.30784	-2.97304	-6.63607	-3.04016	-5.91459	-3.08562	-5.86522	-5.82803	-2.99964	-2.3711	-5.85018	-5.84735	-5.24796
ENSG00000258337	0.743265	0.00605274	RP11-115H15.2	sense_intronic	-2.15921	-2.11255	-1.35692	-2.71368	-1.95744	-1.76317	-2.57131	-2.70534	-6.74694	-1.87986	-2.22038	-2.02962	-2.24376	-2.12262	-2.21416	-2.34866	-4.28026	-0.0466751	-3.28914	-3.02318	-5.85018	-2.14691	-5.24796
ENSG00000255250	0.886037	0.00608615	CTD-2005H7.2	lincRNA	-0.574244	-6.01944	-0.671031	-3.2442	-6.0449	-2.43059	-3.94982	-1.12038	-1.99205	-3.10225	-4.72288	-2.97304	-2.11251	-1.96216	-3.10724	-1.21116	-5.86522	-2.1276	-2.99964	-5.83053	-5.85018	-1.32378	-1.54752
ENSG00000237133	0.773488	0.00608639	AC020594.5	antisense	-5.85965	-6.01944	-5.88048	-3.60677	-6.0449	-3.05862	-6.27175	-2.70534	-3.93958	-2.81275	-6.30784	-2.42555	-6.63607	-3.40273	-2.45516	-3.44819	-5.86522	-3.02068	-4.87411	-5.83053	-5.85018	-2.67742	-3.663
ENSG00000223442	0.713983	0.0060971	AC004041.2	antisense	-1.77218	-2.11255	-1.63256	-1.55614	-3.72298	-1.76317	-1.31755	-0.256034	-1.79274	-1.1429	-3.50049	-2.42555	-1.59168	-1.56623	-5.91459	-2.55511	-4.28026	-2.65811	-2.06675	-1.43821	-5.85018	-1.59942	-2.4406
ENSG00000269560	0.809365	0.0060991	CTD-2192J16.21	sense_intronic	-0.650193	-1.77151	-1.1256	-0.859534	-1.79698	-2.27013	-3.46439	-0.475043	-1.46154	-2.36529	-6.30784	-1.31592	-1.88119	-2.12262	-5.91459	-1.21116	-2.16478	-3.50611	-4.13714	-2.13009	-5.85018	-0.989365	-0.724396
ENSG00000231609	0.969698	0.0061003	AC009501.4	antisense	-3.05229	-3.21208	-0.45422	0.244088	-2.34446	0.899797	0.927925	1.23084	0.565946	-0.780325	-6.30784	1.50145	-0.369287	0.232857	-1.66667	-0.147025	-5.86522	-1.43572	-1.0328	0.0521113	-1.32662	1.63647	-0.724396
ENSG00000231057	-0.7514	0.00614175	RP11-122M14.1	antisense	-5.85965	-3.69751	-3.55856	-6.41412	-6.0449	-4.93309	-3.94982	-6.40578	-2.49901	-6.27218	-2.84841	-6.67348	-3.82872	-6.21009	-5.91459	-6.25555	-5.86522	-4.24307	-3.65171	-3.02318	-3.04283	-5.84735	-2.4406
ENSG00000234492	0.829534	0.00617541	RPL34-AS1	lincRNA	-0.0267564	-6.01944	-2.42105	0.574561	-0.915621	-0.368308	-1.31755	-0.851192	-2.84005	-1.06272	-4.72288	-0.696197	-0.407255	-2.12262	-1.82713	-1.50066	-5.86522	-2.1276	-1.70418	-2.66061	-3.04283	-0.989365	-2.4406
ENSG00000242902	-0.967169	0.00625593	RP11-309L24.2	antisense	-5.85965	-0.975042	-5.88048	-6.41412	-6.0449	-6.51806	-3.10182	-3.23586	-6.74694	-6.27218	-3.13792	-6.67348	-6.63607	-6.21009	-5.91459	-6.25555	-0.655764	-5.82803	-6.45907	-5.83053	-1.94329	-5.84735	-2.4406
ENSG00000234141	0.871799	0.00629858	AC009473.1	antisense	-5.85965	-3.21208	-2.71056	-3.2442	-6.0449	-1.66007	-2.81232	-3.59843	-3.0465	-1.74862	-6.30784	-1.8155	-2.72918	-4.62512	-5.91459	-1.86323	-5.86522	-3.02068	-6.45907	-5.83053	-5.85018	-1.75988	-5.24796
ENSG00000251309	0.726271	0.00631429	RP11-498M5.2	antisense	-3.05229	-3.21208	0.22804	-1.77027	-2.13801	-0.328231	-0.543827	-0.913928	-3.28751	0.266981	-2.22038	-2.76659	-2.11251	-0.232806	-3.59267	-0.64084	-3.05786	-2.65811	-2.37161	-1.74307	-5.85018	-2.14691	-2.4406
ENSG00000233723	0.928859	0.00638588	LINC01122	lincRNA	-0.650193	-4.43447	-2.42105	-2.71368	-2.34446	-0.0102608	0.236047	-0.791071	-1.53748	0.0676719	-3.50049	-1.91859	-1.27852	-3.40273	-3.10724	-0.47419	-5.86522	-2.65811	-6.45907	-1.30697	-5.85018	-0.421081	-1.54752
ENSG00000236861	0.583972	0.0064079	AC006378.2	antisense	-1.61172	-1.49587	-0.522932	0.0616101	-3.72298	-0.042322	-1.22735	-0.339692	0.14788	-0.657468	-2.22038	-0.264086	-1.35067	-0.0202618	-3.10724	-2.55511	-1.95833	-1.18418	-1.32978	0.146748	-2.14974	-1.32378	-2.4406
ENSG00000253636	0.60313	0.00642214	RP11-531A24.5	antisense	2.17927	1.46438	2.79547	2.39645	1.13501	2.44484	-3.10182	1.39512	-0.0326919	1.66446	0.930565	1.83035	0.523797	2.57455	1.48628	1.03907	1.92268	2.83374	1.86736	2.28321	1.9246	1.95355	2.26774
ENSG00000247081	0.691603	0.00650306	RP11-318M2.2	antisense	-0.815252	-0.527583	-1.23663	-0.632764	-2.87498	-0.368308	-0.657038	-0.297256	-0.965578	-0.122431	-1.78428	-1.46402	-1.35067	1.36734	0.685318	-0.583124	-1.77775	-0.273446	-4.13714	0.769381	-1.60226	-1.45503	-5.24796
ENSG00000226798	0.69421	0.00650325	RP11-289F5.1	lincRNA	-5.85965	-6.01944	-5.88048	-2.32666	-6.0449	-6.51806	-6.27175	-6.40578	-6.74694	-6.27218	-6.30784	-5.08851	-6.63607	-3.88816	-5.91459	-6.25555	-5.86522	-3.02068	-6.45907	-2.66061	-5.85018	-3.03999	-5.24796
ENSG00000225684	-1.04014	0.00652221	FAM225B	lincRNA	-5.85965	-2.84951	-5.88048	-6.41412	-2.13801	-3.7107	-3.46439	-4.08385	-6.74694	-6.27218	-1.35364	-6.67348	-1.68188	-6.21009	-0.705142	-2.55511	-3.05786	-1.43572	-2.37161	-5.83053	-3.52826	-1.59942	-0.118675
ENSG00000223749	-0.947426	0.00653398	MIR503HG	lincRNA	-5.85965	-1.26455	-5.88048	-6.41412	-6.0449	-6.51806	-3.46439	-4.08385	-3.28751	-6.27218	-0.635415	-6.67348	-1.68188	-2.75065	-3.10724	-3.44819	-3.05786	-2.65811	-2.06675	-2.66061	-1.94329	-1.20349	-2.07803
ENSG00000232229	0.652948	0.0065462	LINC00865	lincRNA	3.46903	2.43589	4.78396	4.46469	2.29049	5.26371	4.42783	5.00202	4.9643	4.96204	2.57786	3.98384	4.62426	4.01993	3.58326	4.56223	0.821283	2.39597	4.3507	4.49926	1.9246	4.4065	-0.118675
ENSG00000259590	0.958564	0.00657069	RP11-20G13.3	lincRNA	-2.15921	-6.01944	-0.83609	-0.53148	-3.23755	-0.84563	-3.46439	-3.59843	-4.42501	-1.4142	-4.72288	-6.67348	-2.38815	-1.16569	-3.59267	-1.73199	-5.86522	-2.3686	-2.37161	-1.43821	-5.85018	-0.637893	-1.34107
ENSG00000230046	0.965339	0.006579	BIRC6-AS1	antisense	-1.95276	-1.93197	-2.18004	-0.686203	-6.0449	-6.51806	-6.27175	-1.19633	-2.49901	-0.845913	-6.30784	-2.97304	-1.59168	-1.96216	-2.74467	-1.61169	-2.69529	-2.1276	-6.45907	-1.43821	-2.68026	-1.59942	-5.24796
ENSG00000175873	0.647829	0.00662064	AC004840.9	lincRNA	0.616087	-1.77151	2.55831	3.77447	2.94094	3.59699	2.43906	3.26133	2.68142	3.99812	1.42687	3.1673	2.68811	3.81644	1.07409	2.9018	1.27433	0.28049	0.992143	2.03365	1.4627	3.21065	1.05582
ENSG00000231407	-0.697549	0.00663444	RP11-576I22.2	antisense	-2.68972	-3.69751	-3.07313	-2.1662	-1.09071	-1.76317	-2.81232	-6.40578	-1.38939	-3.10225	-1.66398	-2.97304	-1.59168	-3.40273	-2.45516	-2.79612	-3.05786	-4.24307	-1.81521	-5.83053	-1.32662	-3.03999	-2.07803
ENSG00000230366	-0.838054	0.0066698	DSCR9	lincRNA	-5.85965	-6.01944	-2.18004	-6.41412	-3.72298	-6.51806	-3.10182	-6.40578	-1.99205	-4.68722	-4.72288	-6.67348	-4.31415	-6.21009	-2.45516	-6.25555	-3.05786	-2.1276	-3.65171	-5.83053	-3.04283	-5.84735	-5.24796
ENSG00000234134	0.605638	0.00672348	RP11-383C5.5	sense_intronic	-1.21579	-2.84951	-1.35692	-0.799413	-0.759502	-1.09179	-1.06229	-1.88222	-2.65947	-0.544258	-1.55295	-1.62908	-2.38815	-1.81777	-3.59267	-2.34866	-3.54329	-2.65811	-2.06675	-1.07564	-3.52826	-0.561944	-5.24796
ENSG00000225407	0.860506	0.00673706	CTD-2384B11.2	antisense	-4.27468	-2.319	-0.83609	-0.987859	-6.0449	-0.685165	-0.34101	-1.5478	-1.53748	-1.4142	-6.30784	-1.00105	-1.59168	-0.852534	-5.91459	-0.897998	-3.05786	-1.30447	-2.37161	-1.07564	-3.04283	-1.20349	-1.34107
ENSG00000273443	-1.24869	0.00676845	RP11-54O7.18	lincRNA	2.21182	2.29798	-0.152564	-2.02181	2.34311	-2.81762	2.44593	-3.23586	-5.16197	-2.57174	3.0909	-3.86612	0.352611	2.08912	3.2224	0.344363	4.20758	-0.273446	0.411297	0.00235828	1.26876	-1.94046	2.20325
ENSG00000224789	0.775715	0.00685658	AC012363.4	antisense	-5.85965	-6.01944	-1.79302	-3.60677	-6.0449	-3.05862	-6.27175	-3.23586	-3.93958	-3.10225	-6.30784	-6.67348	-6.63607	-6.21009	-5.91459	-3.08562	-5.86522	-5.82803	-3.28914	-2.66061	-5.85018	-3.03999	-5.24796
ENSG00000236700	-0.877363	0.00688969	LINC01010	lincRNA	-5.85965	-1.06524	-5.88048	-6.41412	-3.72298	-6.51806	-6.27175	-6.40578	-6.74694	-6.27218	-6.30784	-6.67348	-6.63607	-3.88816	-0.629193	-6.25555	-3.05786	-5.82803	-4.87411	-5.83053	-5.85018	-5.84735	-1.78853
ENSG00000227407	0.829134	0.00689506	AC008746.3	antisense	-5.85965	-3.21208	-1.35692	-2.95469	-3.23755	-0.790135	-2.18428	-1.04823	-2.10308	-0.914626	-3.13792	-1.18162	-3.17664	-1.81777	-5.91459	-4.67059	-5.86522	-2.1276	-2.99964	-1.74307	-4.26522	-1.09246	-5.24796
ENSG00000258355	-0.762298	0.00692513	RP11-651L5.2	sense_intronic	-4.27468	-1.93197	-2.42105	-2.71368	-1.09071	-4.19613	-1.41377	-3.59843	-2.35462	-3.10225	-1.44986	-4.35155	-0.908154	-3.40273	-5.91459	-4.67059	-0.373365	-1.07315	-0.576425	-1.43821	-1.0953	-2.67742	-1.16049
ENSG00000265743	0.671447	0.00694474	RP11-848P1.3	lincRNA	-3.05229	-6.01944	-1.48817	-2.02181	-3.72298	-3.34813	-3.46439	-1.65089	-3.0465	-2.02425	-3.13792	-3.21405	-2.11251	-1.4552	-2.74467	-2.00762	-5.86522	-3.02068	-2.75863	-2.66061	-5.85018	-2.67742	-2.4406
ENSG00000225152	0.655888	0.00696764	RP11-338O1.2	lincRNA	-5.85965	-6.01944	-5.88048	-2.71368	-6.0449	-3.05862	-3.46439	-2.94635	-5.16197	-6.27218	-6.30784	-2.97304	-4.31415	-3.88816	-5.91459	-3.44819	-5.86522	-5.82803	-6.45907	-3.5086	-5.85018	-4.26238	-5.24796
ENSG00000231976	0.733654	0.00699274	LINC00202-2	lincRNA	-0.650193	-1.06524	-0.208059	-0.987859	-3.23755	-0.685165	0.357609	-2.01346	-4.42501	-0.163654	-2.40095	-2.42555	-1.88119	-1.16569	-2.0077	0.821266	-1.61729	0.28049	-0.904479	-0.701249	-5.85018	-0.89315	-1.54752
ENSG00000249348	0.664127	0.00703287	UGDH-AS1	antisense	-3.05229	-2.11255	-0.671031	0.934605	-0.915621	0.223412	-1.14246	0.0699527	-0.864294	0.739049	-2.22038	0.33775	-0.569985	-0.718233	-1.82713	-0.970148	-1.95833	-2.65811	-1.93551	0.319215	-4.26522	-0.718063	-2.4406
ENSG00000253335	0.751885	0.00704274	RP11-420B22.1	antisense	-0.815252	-6.01944	-1.79302	-0.987859	-0.430194	-2.27013	-2.02382	-1.36139	-3.93958	-1.06272	-1.26345	-2.42555	-1.42662	-1.25589	-2.74467	-1.61169	-3.05786	-2.3686	-4.87411	-1.5826	-5.85018	-0.718063	-1.78853
ENSG00000236393	-0.914027	0.00705313	RP11-320G24.1	lincRNA	-2.68972	-3.21208	-5.88048	-6.41412	-0.618639	-6.51806	-3.46439	-6.40578	-1.88896	-3.95025	-3.50049	-4.35155	-3.82872	-6.21009	-5.91459	-4.67059	-1.34166	-5.82803	-6.45907	-3.02318	-0.7209	-5.84735	-5.24796
ENSG00000261533	-1.44628	0.00711113	RP11-15N24.4	sense_overlapping	-0.187221	0.355604	-5.88048	-6.41412	0.104843	0.681617	0.103292	-6.40578	-6.74694	-6.27218	-1.02244	-6.67348	1.01498	-6.21009	-0.629193	-6.25555	-5.86522	-5.82803	-6.45907	-5.83053	0.524856	-5.84735	-5.24796
ENSG00000272365	-1.04538	0.00713572	RP11-389C8.3	lincRNA	-2.15921	-1.49587	-5.88048	-6.41412	-6.0449	-6.51806	-1.41377	-6.40578	-6.74694	-6.27218	-6.30784	-6.67348	-0.369287	-6.21009	-1.66667	-6.25555	-2.16478	-3.02068	-6.45907	-5.83053	-3.04283	-5.84735	-2.92603
ENSG00000270605	2.14861	0.00720407	RP5-1092A3.4	antisense	2.0291	-6.01944	3.56453	-6.41412	-6.0449	2.47912	-6.27175	3.71186	-6.74694	-6.27218	-1.09839	3.12904	-6.63607	2.71175	-5.91459	-6.25555	-0.373365	1.33184	-6.45907	1.99602	-0.492631	2.16946	0.68278
ENSG00000258702	1.12818	0.00726538	RP11-433J8.1	lincRNA	-5.85965	-6.01944	-5.88048	-0.632764	-1.40105	0.681617	-6.27175	-2.70534	-6.74694	-1.62832	-3.50049	-0.945556	-6.63607	-6.21009	-5.91459	-2.55511	-5.86522	-3.02068	-6.45907	-0.404267	-2.14974	-5.84735	-5.24796
ENSG00000253983	0.958043	0.00728077	RP1-16A9.1	antisense	-0.90545	-6.01944	-0.0991247	-0.92227	-4.45994	0.376762	-1.51686	-1.2765	0.392614	0.0676719	-2.6074	2.57682	1.94513	-1.0808	-0.870201	0.252245	-1.22136	-0.336182	-3.65171	-2.66061	-3.04283	-0.989365	-5.24796
ENSG00000254649	0.646006	0.00728223	RP11-452H21.2	antisense	-1.61172	-4.43447	-0.83609	-0.632764	-1.95744	-2.81762	-2.36486	-3.59843	-2.65947	-0.24981	-3.50049	-2.28116	-2.11251	-1.4552	-2.74467	-3.93362	-4.28026	-1.30447	-2.99964	-0.876335	-4.26522	-1.59942	-2.92603
ENSG00000232044	-0.705878	0.00732493	LINC01105	processed_transcript	-5.85965	-6.01944	-5.88048	-3.60677	-3.23755	-6.51806	-2.36486	-6.40578	-3.93958	-6.27218	-3.50049	-6.67348	-6.63607	-6.21009	-5.91459	-6.25555	-3.05786	-5.82803	-6.45907	-5.83053	-5.85018	-5.84735	-2.92603
ENSG00000259072	0.815852	0.00741431	RP11-96D24.1	lincRNA	-3.05229	-6.01944	-2.18004	-1.65924	-6.0449	-2.12574	-2.36486	-6.40578	-2.84005	-1.1429	-3.98591	-2.76659	-3.17664	-1.81777	-5.91459	-3.93362	-5.86522	-3.50611	-3.65171	-2.13009	-3.04283	-2.38791	-5.24796
ENSG00000260461	-1.23077	0.00742743	RP11-541N10.3	sense_overlapping	-5.85965	-0.464847	-5.88048	-6.41412	-6.0449	-6.51806	-0.389104	-6.40578	-6.74694	-6.27218	-2.05991	-6.67348	-0.0361611	-6.21009	-1.05661	-6.25555	-5.86522	-0.40177	-6.45907	-5.83053	-0.992202	-5.84735	-5.24796
ENSG00000261222	-0.978141	0.00746671	CTD-2006K23.1	lincRNA	-1.95276	-0.734034	-2.42105	-6.41412	-0.316984	-1.0262	-2.57131	-6.40578	-2.65947	-6.27218	-3.98591	-2.14991	-0.486327	-6.21009	-2.21416	-6.25555	-3.05786	-0.698752	-2.37161	-2.3711	-1.76272	-5.84735	-2.4406
ENSG00000259065	0.7318	0.00754487	RP5-1021I20.1	antisense	-0.502094	-0.661884	-1.79302	-0.741698	-2.87498	-2.61116	-0.986345	-1.45158	-1.70254	-2.81275	-4.72288	-0.52373	-2.24376	-1.0808	-3.10724	-2.00762	-3.54329	-0.698752	-6.45907	-0.786138	-3.04283	-0.718063	-1.16049
ENSG00000259209	0.840924	0.00755419	RP5-991G20.2	antisense	-2.15921	-6.01944	-0.83609	-1.65924	-2.34446	-3.7107	-6.27175	-2.15785	-6.74694	-3.46482	-6.30784	-3.50355	-3.46615	-3.40273	-2.45516	-4.67059	-5.86522	-5.82803	-6.45907	-2.66061	-3.04283	-4.26238	-5.24796
ENSG00000227145	-0.719999	0.00755638	IL21-AS1	antisense	-5.85965	-4.43447	-3.07313	-6.41412	-3.23755	-6.51806	-6.27175	-6.40578	-3.0465	-6.27218	-3.50049	-6.67348	-2.93563	-6.21009	-5.91459	-6.25555	-5.86522	-5.82803	-6.45907	-5.83053	-5.85018	-5.84735	-2.4406
ENSG00000254731	0.750216	0.00770659	CTD-2005H7.1	lincRNA	-4.27468	-6.01944	-3.07313	-3.60677	-6.0449	-3.05862	-6.27175	-3.59843	-6.74694	-6.27218	-6.30784	-2.76659	-1.99222	-3.40273	-5.91459	-2.55511	-5.86522	-5.82803	-3.65171	-5.83053	-5.85018	-3.03999	-5.24796
ENSG00000258701	-1.1876	0.00771992	LINC00638	lincRNA	-5.85965	-6.01944	-5.88048	-6.41412	-6.0449	-6.51806	-1.74819	-6.40578	-6.74694	-6.27218	-1.02244	-6.67348	-0.19313	0.558098	-1.66667	-6.25555	-2.16478	-3.50611	-1.32978	-5.83053	-5.85018	-5.84735	-0.389977
ENSG00000258210	1.17875	0.00775594	RP11-478C19.2	processed_transcript	-0.305058	-6.01944	-0.208059	-1.12872	-0.553051	-0.178205	-6.27175	0.536734	-0.518119	-6.27218	-6.30784	-0.892117	-1.35067	-1.25589	-0.299885	-1.50066	-5.86522	0.400784	0.255178	-0.338679	-5.85018	-1.75988	-5.24796
ENSG00000272275	-0.609819	0.00775704	RP11-791G15.2	lincRNA	-3.05229	1.01399	-1.97359	-1.05657	0.104843	-1.23265	-1.51686	-0.791071	-0.518119	-0.544258	0.586978	0.06799	-1.77809	-1.25589	-0.557043	-0.27827	0.764139	-3.02068	-1.17367	-2.66061	0.258341	-3.03999	0.109594
ENSG00000226862	0.845395	0.00779191	RP11-569A11.1	antisense	-5.85965	-6.01944	-3.07313	-2.1662	-6.0449	-3.34813	-1.51686	-2.15785	-4.42501	-2.81275	-6.30784	-2.28116	-2.38815	-3.04016	-5.91459	-1.86323	-3.54329	-2.65811	-6.45907	-3.02318	-5.85018	-1.94046	-1.54752
ENSG00000254391	0.928203	0.00780453	CTC-529G1.1	antisense	-1.95276	-6.01944	-1.63256	-2.32666	-6.0449	-0.963467	-1.51686	-0.67786	-2.35462	-1.51729	-6.30784	-5.08851	-3.82872	-1.16569	-3.10724	-1.30135	-5.86522	-4.24307	-3.28914	-5.83053	-3.04283	-2.14691	-5.24796
ENSG00000260969	0.638172	0.0078617	RP11-190D6.2	antisense	-5.85965	-6.01944	-2.71056	-3.60677	-3.72298	-3.34813	-6.27175	-3.59843	-6.74694	-6.27218	-6.30784	-4.35155	-6.63607	-6.21009	-5.91459	-3.93362	-5.86522	-5.82803	-6.45907	-3.5086	-5.85018	-5.84735	-5.24796
ENSG00000238078	0.70112	0.00794598	RP11-295M18.2	lincRNA	-3.05229	-3.69751	-2.18004	-0.391755	-3.72298	-0.178205	-1.62789	-0.67786	-1.13223	-0.717589	-3.13792	-1.31592	-1.88119	-0.924684	-3.10724	-0.527629	-0.655764	-3.50611	-2.75863	-3.02318	-4.26522	-1.09246	-5.24796
ENSG00000247728	0.602895	0.00797731	RP11-932O9.7	antisense	-0.650193	-1.26455	-3.07313	0.0288202	-1.40105	0.223412	-3.10182	-1.36139	-0.557113	0.469289	-2.22038	-1.11889	-1.68188	-0.852534	-2.45516	-1.21116	-3.54329	-2.3686	-2.99964	-0.786138	-3.04283	-0.421081	-0.604102
ENSG00000255094	0.764561	0.00798697	RP11-406D1.2	lincRNA	-5.85965	-6.01944	-2.42105	-3.60677	-6.0449	-2.61116	-6.27175	-6.40578	-6.74694	-6.27218	-6.30784	-1.91859	-5.05111	-6.21009	-5.91459	-3.44819	-5.86522	-5.82803	-3.65171	-3.5086	-5.85018	-1.94046	-5.24796
ENSG00000255343	0.812663	0.00799234	RP11-299M14.2	3prime_overlapping_ncrna	-2.15921	-6.01944	-2.71056	-4.0922	-6.0449	-4.19613	-6.27175	-4.82082	-6.74694	-6.27218	-3.50049	-6.67348	-6.63607	-3.40273	-5.91459	-3.08562	-5.86522	-3.02068	-6.45907	-1.92364	-5.85018	-5.84735	-2.92603
ENSG00000224272	-0.889552	0.0079936	AC114730.3	antisense	4.80658	4.26017	1.95872	1.17833	5.4614	-1.99449	3.8459	4.27458	1.83426	1.24352	5.33917	-0.74274	3.68021	3.20987	3.66849	3.75428	4.7705	4.13919	2.3643	4.30518	4.65464	1.51898	4.71349
ENSG00000255036	1.25877	0.00807192	RP11-23J9.4	processed_transcript	1.83384	-3.21208	3.20963	4.36806	-2.13801	3.02691	3.63063	-0.67786	2.64753	3.58736	-1.02244	2.67304	2.60472	3.43917	0.107773	0.0843002	-2.40579	-1.58011	-2.99964	3.09131	3.24521	3.72441	-5.24796
ENSG00000251330	0.746907	0.0081009	CTD-2283N19.1	antisense	-4.27468	-1.93197	-1.48817	-0.185305	-2.58547	0.0518002	-2.18428	0.28072	-2.49901	-0.206089	-4.72288	0.269038	-0.753431	-0.327443	-1.39103	-0.763697	-1.4729	-1.92114	-2.06675	-1.92364	-1.60226	-0.989365	-5.24796
ENSG00000247131	-0.787181	0.00810948	RP11-588G21.2	antisense	-5.85965	-4.43447	-5.88048	-2.1662	-3.23755	-2.61116	-0.438857	-4.82082	-1.46154	-6.27218	-2.84841	-3.86612	-3.17664	-2.3032	-2.0077	-3.44819	-1.61729	-3.50611	-0.626178	-0.701249	-1.76272	-3.52542	-2.07803
ENSG00000232485	0.6644	0.00815325	AC098820.3	processed_transcript	-3.05229	-6.01944	-3.07313	-1.55614	-2.87498	-1.47366	-2.81232	-2.94635	-2.22338	-1.87986	-6.30784	-1.38807	-1.50679	-2.50965	-3.10724	-2.55511	-3.05786	-3.02068	-4.13714	-3.02318	-3.52826	-2.67742	-5.24796
ENSG00000254777	0.661811	0.00816319	AC022182.1	lincRNA	-0.815252	-2.56	-2.18004	-1.05657	-3.72298	0.776565	-0.00496091	-0.791071	-0.914047	0.297678	-0.950288	-0.790834	-0.52755	-1.00063	-2.45516	-0.0267311	-2.69529	-1.43572	-1.70418	-0.786138	-3.52826	-2.38791	-5.24796
ENSG00000229043	0.651649	0.00826589	AC091729.9	antisense	0.480204	0.209383	-0.265775	1.42508	0.555009	0.720349	-0.389104	0.223576	-0.72457	0.598187	-0.118016	-0.40669	-0.128279	-0.0202618	0.0161423	1.21206	-1.00724	-0.100114	-1.50487	-0.338679	-5.85018	1.14134	-1.34107
ENSG00000266970	-0.910204	0.00829397	RP11-806H10.4	lincRNA	-5.85965	-1.16145	-5.88048	-2.71368	-1.95744	-6.51806	-2.36486	-6.40578	-3.28751	-3.46482	-1.35364	-2.76659	-1.77809	-6.21009	-3.10724	-3.44819	-3.54329	-2.65811	-6.45907	-5.83053	-5.85018	-5.84735	-1.78853
ENSG00000253270	0.798911	0.00834326	RP11-1105O14.1	lincRNA	-5.85965	-6.01944	-2.18004	-2.71368	-6.0449	-4.93309	-6.27175	-2.70534	-6.74694	-3.46482	-2.6074	-1.8155	-2.54861	-6.21009	-5.91459	-4.67059	-5.86522	-2.65811	-3.28914	-2.13009	-5.85018	-3.03999	-5.24796
ENSG00000227953	0.72159	0.00835553	RP11-439E19.3	processed_transcript	1.19564	-0.238076	2.39098	1.85734	0.749512	2.98776	3.413	3.47227	3.06524	1.77767	-0.425197	1.62573	1.31229	0.199305	-0.960399	2.57417	-3.05786	0.741821	0.140845	1.08833	-1.20633	2.58311	1.3219
ENSG00000225527	0.81915	0.00836686	RP11-383B4.4	antisense	-4.27468	-4.43447	-3.07313	-1.55614	-3.72298	-0.635412	-0.779894	-1.12038	-1.88896	0.386033	-1.78428	-0.840587	-1.88119	-4.62512	-5.91459	-1.61169	-3.54329	-2.1276	-3.65171	-2.3711	-5.85018	-1.59942	-5.24796
ENSG00000251432	0.692845	0.00840162	RP11-420A23.1	lincRNA	3.59362	-2.11255	3.77951	3.37215	1.81928	2.73224	3.9094	1.24527	-0.864294	3.34804	2.07154	1.63486	1.55868	1.85061	1.70746	4.41067	2.41555	1.24878	0.79832	2.93434	0.864062	2.42412	2.41738
ENSG00000227617	0.696686	0.00842333	CERS6-AS1	antisense	-2.68972	-0.809982	-0.83609	-2.95469	-6.0449	-1.99449	-3.46439	-2.94635	-3.28751	-2.57174	-3.50049	-1.00105	-3.82872	-1.56623	-5.91459	-2.79612	-3.05786	-1.07315	-1.41467	-1.74307	-3.52826	-0.989365	-2.07803
ENSG00000253653	0.614587	0.00847914	CTC-248O19.1	antisense	0.290101	-0.809982	-1.79302	-0.185305	-0.835451	-0.451966	-1.87943	0.194132	-1.13223	-0.914626	-1.44986	-1.71928	-1.50679	-1.56623	-2.74467	-1.73199	-5.86522	-0.698752	-1.70418	0.0521113	-3.04283	-0.489794	-1.00003
ENSG00000259418	0.594865	0.00851103	RP11-109D20.1	antisense	-4.27468	-6.01944	-3.07313	-4.0922	-4.45994	-4.19613	-6.27175	-4.08385	-3.93958	-6.27218	-6.30784	-5.08851	-6.63607	-6.21009	-5.91459	-6.25555	-5.86522	-3.02068	-6.45907	-4.24557	-5.85018	-3.52542	-5.24796
ENSG00000233478	-0.733116	0.00853151	RP1-187B23.1	antisense	-2.15921	-1.77151	-0.671031	-3.60677	0.294946	-6.51806	-2.02382	-2.70534	-1.61765	-3.46482	-0.33056	-2.42555	-1.42662	-1.0808	-1.15971	-2.00762	-1.4729	-3.02068	-3.65171	-3.02318	-1.94329	-2.38791	0.77441
ENSG00000228271	0.831949	0.00853574	RP11-513G11.2	lincRNA	-5.85965	-6.01944	-5.88048	-3.60677	-6.0449	-1.3086	-6.27175	-1.12038	-3.28751	-1.1429	-6.30784	-4.35155	-6.63607	-6.21009	-5.91459	-2.79612	-5.86522	-5.82803	-6.45907	-5.83053	-5.85018	-5.84735	-5.24796
ENSG00000268836	1.3222	0.00853696	LA16c-OS12.2	lincRNA	-1.33608	-6.01944	0.22804	-6.41412	-1.18692	0.537227	-6.27175	0.960541	-6.74694	-0.490818	-6.30784	0.120939	-6.63607	-0.924684	-1.52228	-0.64084	-1.00724	-1.07315	-1.81521	-5.83053	-1.76272	-1.75988	-5.24796
ENSG00000273106	0.908949	0.00858918	RP11-559M23.1	antisense	-0.305058	-1.77151	-1.0225	-1.28484	-6.0449	-1.47366	-0.0819229	-3.59843	-6.74694	-1.62832	-1.02244	-0.892117	-6.63607	-0.428727	-2.21416	0.11949	-3.05786	-1.58011	-3.65171	-3.02318	-2.14974	-1.09246	-1.16049
ENSG00000223947	-1.02865	0.00860181	AC016738.4	antisense	-2.15921	-2.319	-3.07313	-3.60677	0.92088	-6.51806	-2.02382	-3.59843	-3.0465	-3.46482	-1.26345	-6.67348	-1.59168	-2.50965	-1.05661	-6.25555	-0.310629	-5.82803	-6.45907	-5.83053	-5.85018	-5.84735	-5.24796
ENSG00000231160	0.719502	0.00864267	RP11-617D20.1	antisense	3.82159	1.03585	2.41872	3.69309	0.104843	-0.451966	1.74506	3.56145	-0.557113	4.11261	2.64926	0.777734	1.5488	3.25139	2.48201	4.18636	0.734695	3.60451	1.52393	3.23825	3.51832	2.67229	1.3219
ENSG00000267146	0.662162	0.00870613	RP11-383D22.1	antisense	-2.68972	-6.01944	-2.42105	-3.60677	-6.0449	-4.93309	-6.27175	-6.40578	-6.74694	-3.46482	-6.30784	-6.67348	-6.63607	-6.21009	-5.91459	-6.25555	-5.86522	-5.82803	-6.45907	-3.02318	-5.85018	-5.84735	-5.24796
ENSG00000272142	0.705163	0.00872155	RP11-428J1.5	lincRNA	-1.46733	-6.01944	0.8877	0.125036	-1.65259	1.04419	-0.163223	-1.5478	-0.239143	0.414322	-0.753251	0.359946	0.258744	0.989586	-1.39103	-0.233182	-1.4729	-1.43572	-2.06675	-1.18668	-2.39075	0.782011	-1.34107
ENSG00000257671	-0.837343	0.00881377	RP3-416H24.1	antisense	-5.85965	-3.21208	-5.88048	-3.60677	-6.0449	-6.51806	-2.57131	-6.40578	-6.74694	-6.27218	-3.50049	-6.67348	-6.63607	-3.40273	-3.10724	-6.25555	-1.22136	-5.82803	-6.45907	-5.83053	-2.68026	-5.84735	-2.4406
ENSG00000257272	-0.7453	0.00882441	RP11-317N8.3	lincRNA	-5.85965	-3.69751	-3.07313	-6.41412	-6.0449	-6.51806	-2.57131	-6.40578	-2.49901	-6.27218	-6.30784	-6.67348	-5.05111	-6.21009	-5.91459	-6.25555	-2.16478	-5.82803	-6.45907	-5.83053	-5.85018	-5.84735	-2.92603
ENSG00000269392	0.816117	0.00883602	CTB-191K22.6	antisense	-2.68972	-6.01944	-2.71056	-1.65924	-6.0449	-2.27013	-4.68678	-1.5478	-1.88896	-2.18472	-3.50049	-3.50355	-2.72918	-4.62512	-5.91459	-2.34866	-5.86522	-5.82803	-3.65171	-1.74307	-5.85018	-5.84735	-5.24796
ENSG00000225956	0.635165	0.00884803	RP5-1077I2.3	antisense	-1.46733	-6.01944	-3.07313	-2.32666	-2.87498	-2.61116	-2.81232	-3.23586	-3.93958	-1.51729	-2.40095	-1.91859	-2.54861	-3.40273	-5.91459	-3.44819	-5.86522	-2.3686	-3.65171	-2.3711	-3.52826	-3.52542	-2.92603
ENSG00000273059	0.732902	0.00889729	XXyac-YX155B6.7	lincRNA	-5.85965	-3.69751	-2.71056	-6.41412	-6.0449	-3.7107	-6.27175	-1.88222	-3.0465	-6.27218	-6.30784	-3.50355	-6.63607	-3.40273	-5.91459	-3.44819	-5.86522	-5.82803	-6.45907	-3.02318	-5.85018	-3.03999	-5.24796
ENSG00000267546	0.811774	0.00892015	RP11-666A8.8	antisense	1.10614	-2.11255	0.913931	-0.305599	-0.212014	-0.587318	-3.46439	0.733771	-1.25508	-0.389535	-0.285472	0.269038	0.209416	0.0936944	-2.74467	1.00184	-3.54329	-4.24307	-2.75863	-3.02318	-3.52826	0.302401	-2.4406
ENSG00000232811	-1.11958	0.00898098	RP11-96K19.2	antisense	3.99678	2.32486	1.21755	0.725428	3.12251	0.98179	1.07698	-6.40578	0.329878	0.62264	1.61697	0.545692	0.234291	0.684731	2.76136	-6.25555	4.18871	1.44809	2.37065	1.20289	2.90804	0.628387	3.10519
ENSG00000237471	-0.696257	0.00900033	AC073115.6	lincRNA	-3.05229	-3.69751	-5.88048	-4.0922	-2.87498	-6.51806	-6.27175	-6.40578	-3.28751	-6.27218	-3.50049	-6.67348	-3.82872	-6.21009	-2.74467	-6.25555	-5.86522	-5.82803	-2.75863	-5.83053	-5.85018	-4.26238	-5.24796
ENSG00000231536	-0.7109	0.00909905	AC123886.2	antisense	-5.85965	-2.56	-5.88048	-6.41412	-6.0449	-6.51806	-2.81232	-6.40578	-4.42501	-6.27218	-4.72288	-5.08851	-6.63607	-6.21009	-3.59267	-6.25555	-5.86522	-5.82803	-6.45907	-3.02318	-2.39075	-5.84735	-2.92603
ENSG00000212663	0.80464	0.00911053	RP1-122K4.3	lincRNA	-2.15921	-6.01944	-1.97359	-3.60677	-3.72298	-2.12574	-3.10182	-2.49889	-3.93958	-3.46482	-6.30784	-6.67348	-4.31415	-2.75065	-5.91459	-1.50066	-5.86522	-3.02068	-2.55218	-2.13009	-5.85018	-2.38791	-2.07803
ENSG00000268149	0.644432	0.00912881	CTD-3193O13.13	antisense	-2.40021	-6.01944	-5.88048	-3.60677	-4.45994	-6.51806	-6.27175	-6.40578	-6.74694	-6.27218	-6.30784	-3.86612	-6.63607	-3.40273	-5.91459	-3.44819	-5.86522	-5.82803	-6.45907	-5.83053	-5.85018	-3.03999	-5.24796
ENSG00000031544	0.852436	0.00913433	NR2E3	processed_transcript	-5.85965	-2.319	-0.751201	-0.53148	-3.23755	-3.34813	-1.62789	-0.475043	-1.88896	-0.914626	-3.50049	-1.8155	-3.82872	-2.12262	-5.91459	-0.700961	-2.16478	-1.07315	-4.13714	-0.275943	-5.85018	-1.32378	-2.07803
ENSG00000256204	-0.837515	0.00921215	RP11-243M5.1	lincRNA	-5.85965	-4.43447	-5.88048	-6.41412	-6.0449	-6.51806	-6.27175	-6.40578	-4.42501	-6.27218	-3.98591	-6.67348	-3.82872	-1.56623	-0.422742	-6.25555	-2.40579	-5.82803	-6.45907	-5.83053	-1.60226	-5.84735	-5.24796
ENSG00000223486	-0.797838	0.00928287	AC092198.1	lincRNA	0.908538	-0.238076	-2.42105	-1.36973	1.87991	-2.81762	1.02287	-1.76192	0.329878	-2.18472	-0.57992	-2.14991	0.621314	0.684731	-1.52228	-2.00762	0.0655196	-5.82803	-3.65171	-0.876335	0.172185	-1.32378	0.178307
ENSG00000271803	0.806878	0.00950167	RP1-63M2.5	antisense	-2.68972	-6.01944	-1.35692	-3.60677	-4.45994	-0.328231	-1.06229	-1.12038	-1.70254	-2.81275	-3.50049	-1.31592	-3.82872	-2.3032	-5.91459	-2.55511	-3.05786	-2.65811	-2.55218	-1.5826	-5.85018	-5.84735	-5.24796
ENSG00000262147	-0.591464	0.0095192	RP13-638C3.3	antisense	1.80569	-0.809982	-0.83609	-1.45993	0.669342	-1.1605	0.357609	-1.04823	-1.88896	-2.18472	0.811101	-2.02962	0.209416	-0.143997	1.20435	-0.27827	1.82827	-0.698752	-0.309321	-1.5826	1.4072	-0.89315	0.0374445
ENSG00000223907	0.879161	0.00955778	RP11-439L8.4	lincRNA	1.74768	1.43178	3.18829	1.25121	-1.18692	4.18152	1.14611	5.55458	3.53731	0.203555	0.611023	1.16573	2.78809	3.44991	2.1461	3.72602	-0.0838581	3.55783	3.8321	5.13597	0.299564	5.3988	0.109594
ENSG00000267454	0.660758	0.00955951	ZNF582-AS1	lincRNA	-0.502094	-3.21208	-0.522932	2.0412	-0.835451	1.21665	0.357609	-0.0659308	-0.518119	1.14567	-1.78428	0.583911	-0.369287	-0.482166	-1.27074	0.963619	-0.373365	-3.02068	-3.65171	0.398287	0.489667	0.381473	-0.724396
ENSG00000256628	-1.55781	0.00958048	ZBTB11-AS1	antisense	-5.85965	0.638776	-5.88048	-6.41412	0.258877	-6.51806	1.21207	-6.40578	-6.74694	-6.27218	-6.30784	-6.67348	0.352611	-6.21009	-5.91459	1.506	-5.86522	-5.82803	-6.45907	-5.83053	1.89801	-5.84735	1.54646
ENSG00000233208	1.04141	0.00965769	LINC00642	lincRNA	1.6402	-6.01944	0.98988	2.54877	1.87991	4.46137	3.33743	3.87846	2.18675	4.26795	2.24291	1.67967	2.27382	0.0567002	-1.39103	1.14533	-3.05786	1.67181	-1.0328	0.739324	-1.0953	4.00908	2.50024
ENSG00000269959	-0.864987	0.00968666	SPACA6P-AS	lincRNA	-5.85965	-1.16145	-5.88048	-3.60677	-2.34446	-6.51806	-1.74819	-6.40578	-3.28751	-6.27218	-3.50049	-3.86612	-6.63607	-1.81777	-5.91459	-6.25555	-3.05786	-5.82803	-3.65171	-5.83053	-3.04283	-5.84735	-5.24796
ENSG00000231290	0.838342	0.00969332	APCDD1L-AS1	processed_transcript	-2.40021	-3.21208	-1.79302	-2.32666	-2.87498	-1.8742	-2.36486	0.692251	-0.965578	-1.51729	-6.30784	-3.21405	-3.82872	-3.40273	-5.91459	-2.79612	-5.86522	-5.82803	-3.65171	-1.74307	-5.85018	-1.59942	-2.92603
ENSG00000271721	-1.16199	0.00972143	RP11-337C18.9	antisense	-5.85965	0.00293207	-5.88048	-6.41412	-6.0449	-6.51806	-6.27175	-6.40578	-6.74694	-6.27218	-0.635415	-6.67348	-6.63607	-6.21009	-5.91459	-6.25555	-5.86522	-1.58011	-0.967215	-5.83053	-0.564781	-5.84735	1.12708
ENSG00000230526	-0.580398	0.00975279	RP11-472G21.2	lincRNA	-3.53772	-3.69751	-5.88048	-6.41412	-6.0449	-6.51806	-4.68678	-6.40578	-6.74694	-6.27218	-3.98591	-6.67348	-3.46615	-6.21009	-3.10724	-6.25555	-5.86522	-5.82803	-4.13714	-5.83053	-5.85018	-5.84735	-5.24796
ENSG00000254968	0.715812	0.00977302	RP11-65M17.3	lincRNA	-3.53772	-2.319	-3.55856	-4.0922	-6.0449	-4.19613	-6.27175	-2.31832	-3.93958	-2.02425	-6.30784	-3.50355	-4.31415	-1.56623	-5.91459	-3.44819	-5.86522	-5.82803	-4.13714	-5.83053	-5.85018	-4.26238	-5.24796
ENSG00000237476	-0.772447	0.00982615	XXbac-B135H6.15	lincRNA	-5.85965	-6.01944	-5.88048	-6.41412	-6.0449	-6.51806	-3.46439	-6.40578	-2.49901	-6.27218	-3.98591	-6.67348	-2.24376	-6.21009	-3.10724	-6.25555	-5.86522	-5.82803	-3.65171	-3.5086	-5.85018	-2.38791	-2.4406
ENSG00000226526	-0.812529	0.0098293	RP1-37C10.3	antisense	-1.61172	-1.77151	-5.88048	-4.82916	-2.34446	-2.27013	-1.31755	-3.59843	-3.57701	-3.95025	-0.52648	-6.67348	-1.35067	-2.3032	-1.52228	-3.44819	-0.438953	-3.02068	-3.28914	-1.5826	-1.76272	-5.84735	-5.24796
ENSG00000240801	0.820738	0.00984945	AC132217.4	processed_transcript	-3.53772	-6.01944	-5.88048	-2.50723	-6.0449	-4.19613	-2.81232	-2.49889	-2.65947	-3.10225	-6.30784	-5.08851	-6.63607	-2.75065	-5.91459	-6.25555	-5.86522	-5.82803	-6.45907	-0.215822	-5.85018	-4.26238	-5.24796
ENSG00000181798	0.726702	0.00996503	LINC00471	processed_transcript	-1.46733	-6.01944	-0.83609	-1.77027	-2.34446	-1.99449	-1.87943	-2.01346	-0.371898	-2.18472	-3.50049	-1.24721	-1.02136	-0.924684	-3.10724	-2.55511	-2.40579	-2.1276	-2.55218	-1.30697	-5.85018	-0.89315	-5.24796
ENSG00000226877	0.625771	0.00999291	RP11-575L7.2	antisense	-3.53772	-6.01944	-4.29552	-2.95469	-6.0449	-2.12574	-3.94982	-4.08385	-3.28751	-3.95025	-6.30784	-2.42555	-5.05111	-4.62512	-5.91459	-6.25555	-5.86522	-3.50611	-4.87411	-5.83053	-4.26522	-3.52542	-5.24796
ENSG00000225163	0.729655	0.00999621	LINC00618	lincRNA	-1.77218	-6.01944	-0.751201	-0.632764	-1.79698	-0.495688	-0.543827	0.977924	0.171926	-0.599753	-0.753251	-0.52373	-0.963649	0.0567002	-5.91459	-0.527629	-1.34166	-0.273446	-1.93551	-0.158106	-1.32662	-0.802952	-1.00003

## Sheet: Table S3_B
		The table contain the list of 113 Ph-like relapse-specific lncRNAs between ID and REL samples obtained using LIMMA voom
Geneid	logFC	Pval	Gene_sym	Gene_type	AE10_ID	AE10_REL	AL18_ID	AL18_REL	AL33_ID	AL33_REL	PE04_ID	PE04_REL	PE05_ID	PE05_REL	PE10_ID	PE10_REL	PE12_ID	PE12_REL	PL05_ID	PL05_REL	PL06_ID	PL06_REL	PL08_REL	PL13_ID	PL13_REL
ENSG00000260464	1.66489	5.59e-05	RP4-561L24.3	lincRNA	-1.37858	-6.59221	-6.60219	-6.83538	-0.238997	-6.57312	-0.743148	-6.45795	-1.73468	-6.59308	-0.99586	-6.03213	-5.86255	-6.23454	-6.01459	-6.44172	-6.10854	-6.03222	-6.05552	-1.07443	-6.60322
ENSG00000222035	0.945007	7.45e-05	AC079354.3	antisense	-3.42921	-6.59221	-3.79483	-6.83538	-6.26137	-6.57312	-6.02855	-6.45795	-3.93631	-6.59308	-5.51942	-6.03213	-3.0552	-6.23454	-6.01459	-6.44172	-3.30119	-6.03222	-6.05552	-3.88178	-6.60322
ENSG00000229228	1.19375	7.47e-05	LINC00582	antisense	-3.42921	-6.59221	-2.90175	-3.66545	-3.45401	-3.76577	-2.32811	-6.45795	-2.79881	-6.59308	-1.27149	-6.03213	-4.27759	-6.23454	-4.42962	-6.44172	-3.30119	-6.03222	-6.05552	-2.65939	-2.35529
ENSG00000272320	1.56129	0.000104364	RP11-506K6.4	antisense	-6.23656	-6.59221	-0.00227347	-6.83538	-0.58894	-2.87268	-6.02855	-6.45795	-1.40026	-6.59308	-1.81898	-6.03213	-1.77509	-3.42718	-1.49102	-2.74128	-1.58498	-6.03222	-6.05552	-2.65939	-6.60322
ENSG00000230266	1.33084	0.000106289	XXYLT1-AS2	antisense	-0.508642	-2.89177	-1.95833	-1.54997	-1.21697	-2.66623	-1.78062	-6.45795	-2.35135	-6.59308	-1.61253	-2.33169	0.366267	-4.64958	-1.15661	-2.04941	-1.46469	-2.33178	-6.05552	-1.21882	-6.60322
ENSG00000180081	1.15804	0.000126648	CTC-451A6.4	lincRNA	-1.98864	-6.59221	-4.28026	-6.83538	-0.975963	-6.57312	-2.32811	-6.45795	-6.25824	-6.59308	-5.51942	-6.03213	-3.54062	-6.23454	-4.42962	-6.44172	-6.10854	-6.03222	-6.05552	-5.46675	-6.60322
ENSG00000249849	1.04471	0.000204932	RP11-1101H11.1	antisense	-3.42921	-3.13278	-3.79483	-5.25041	-3.45401	-4.98816	-2.85863	-3.65059	-4.67328	-6.59308	-3.93446	-6.03213	-1.95566	-6.23454	-2.55515	-6.44172	-1.25056	-3.22486	-6.05552	-3.88178	-6.60322
ENSG00000267852	0.934021	0.000211222	CTB-133G6.2	antisense	0.0672179	-1.63802	-2.07862	-2.31182	-0.58894	-1.44384	-1.38469	-3.65059	-0.327503	-2.50561	-0.390139	-3.22477	2.38062	-0.351896	-0.342161	-4.1198	-0.0424541	-1.78429	-1.6632	-1.07443	-2.07966
ENSG00000261839	-1.47348	0.000280793	RP1-265C24.8	lincRNA	-0.455203	-0.526123	-6.60219	0.899333	-6.26137	0.415561	-0.899267	0.741725	-6.25824	-1.03849	-5.51942	-0.359702	-0.577149	-0.742686	-0.0838488	-0.464444	-1.25056	0.234571	1.0213	-1.07443	0.315646
ENSG00000268613	1.55996	0.000462723	CTD-2620I22.7	lincRNA	-0.508642	-6.59221	-0.820827	-6.83538	-6.26137	-6.57312	-3.70662	-6.45795	-0.703651	-6.59308	-5.51942	-2.5727	-0.247842	-6.23454	-6.01459	-6.44172	-0.750991	-2.57278	-6.05552	-2.00731	-6.60322
ENSG00000261270	-1.04578	0.000532255	RP11-325K4.3	sense_intronic	-3.91463	-2.19989	-0.624906	-0.726853	-0.903813	-0.383299	-1.50499	0.141966	-4.67328	-1.38362	-5.51942	-1.63981	-3.54062	-1.71098	-3.69266	-1.68684	-6.10854	-2.33178	-1.6632	-5.46675	-3.14379
ENSG00000261604	-1.22911	0.000651946	CTD-2636A23.2	antisense	-6.23656	0.175972	-6.60219	-5.25041	-3.45401	-2.87268	-6.02855	-4.13602	-4.67328	-5.00811	-5.51942	-2.5727	-5.86255	-0.949137	-6.01459	-4.85676	-6.10854	0.234571	-4.47055	-5.46675	-5.01826
ENSG00000267557	0.815577	0.000759353	CTC-379B2.4	antisense	-6.23656	-6.59221	-6.60219	-5.25041	-4.6764	-6.57312	-4.44359	-6.45795	-3.45089	-6.59308	-2.71207	-6.03213	-5.86255	-6.23454	-3.20723	-6.44172	-3.78662	-6.03222	-6.05552	-5.46675	-6.60322
ENSG00000262905	1.22175	0.000780823	RP5-1029F21.2	antisense	-1.02711	-3.78486	-2.51472	-6.83538	-0.8351	-4.2512	-6.02855	-4.13602	-2.17078	-1.94922	-1.27149	-6.03213	-1.47023	-1.71098	-2.84466	-6.44172	-3.78662	-6.03222	-6.05552	-2.29682	-6.60322
ENSG00000215417	-0.818265	0.000781573	MIR17HG	processed_transcript	-0.74471	1.66988	-0.452439	-0.09391	0.277794	1.63145	0.121197	1.34295	1.43525	3.19646	0.546667	2.68555	1.93835	2.09189	1.8983	4.63041	0.857241	3.17967	3.60804	1.13317	2.34807
ENSG00000258748	1.24447	0.00087121	CTD-2223O18.1	antisense	-3.42921	-6.59221	-4.28026	-6.83538	-3.45401	-6.57312	-1.78062	-2.75751	-2.17078	-3.13364	-1.81898	-2.8622	-2.40312	-6.23454	-1.76666	-6.44172	0.632924	-0.00984743	-6.05552	-3.14482	-6.60322
ENSG00000260545	0.828419	0.000930781	CTB-134F13.1	antisense	2.83222	0.00770083	1.38081	1.70765	-0.706776	0.321694	0.38084	-1.1004	-0.192151	-1.23552	2.10263	-0.417417	1.91224	0.0692417	2.25688	-1.01546	1.58494	-1.50865	-0.440807	-0.181344	-2.35529
ENSG00000259005	0.97544	0.00107109	RP3-449M8.6	lincRNA	-1.98864	-6.59221	-2.20987	-4.02802	-4.6764	-4.98816	-2.32811	-6.45795	-6.25824	-6.59308	-2.71207	-6.03213	-5.86255	-6.23454	-6.01459	-6.44172	-3.30119	-6.03222	-6.05552	-2.65939	-3.79586
ENSG00000233332	0.783027	0.00114359	RP4-799P18.2	antisense	-6.23656	-5.00725	-3.79483	-6.83538	-3.09144	-6.57312	-6.02855	-6.45795	-6.25824	-6.59308	-5.51942	-6.03213	-3.54062	-6.23454	-3.69266	-6.44172	-3.30119	-6.03222	-6.05552	-5.46675	-6.60322
ENSG00000269139	0.752044	0.00126055	CTD-3193O13.8	antisense	-4.6516	-6.59221	-3.79483	-4.51345	-6.26137	-6.57312	-6.02855	-6.45795	-3.93631	-6.59308	-2.05999	-6.03213	-4.27759	-6.23454	-6.01459	-6.44172	-4.52358	-6.03222	-6.05552	-5.46675	-6.60322
ENSG00000266718	0.958198	0.0015322	RP11-466A19.1	antisense	-6.23656	-3.78486	-3.79483	-6.83538	-3.45401	-6.57312	-3.2212	-6.45795	-4.67328	-6.59308	-1.81898	-6.03213	-3.0552	-6.23454	-1.92712	-3.63437	-6.10854	-6.03222	-6.05552	-5.46675	-6.60322
ENSG00000257725	0.832453	0.00159813	RP11-654D12.3	lincRNA	-3.91463	-6.59221	-5.01722	-6.83538	-6.26137	-6.57312	-6.02855	-4.13602	-6.25824	-6.59308	-3.93446	-6.03213	-2.69263	-6.23454	-2.84466	-6.44172	-2.93862	-6.03222	-6.05552	-5.46675	-6.60322
ENSG00000239569	2.64382	0.00164038	KMT2E-AS1	antisense	3.2412	-6.59221	3.35346	3.43492	-4.6764	-6.57312	2.98547	-6.45795	-6.25824	-6.59308	-5.51942	-6.03213	4.77317	3.63737	3.51874	-6.44172	4.11907	-6.03222	-6.05552	1.63129	-6.60322
ENSG00000255856	1.17004	0.00169272	RP11-87C12.5	lincRNA	-0.951161	-1.16595	-6.60219	-6.83538	-1.61751	-6.57312	-2.32811	-6.45795	-2.5578	-6.59308	-1.81898	-6.03213	-1.47023	-2.32765	-1.15661	-3.63437	-2.64911	-3.71029	-6.05552	-2.00731	-2.69633
ENSG00000203593	0.805978	0.00176605	RP5-1096D14.6	antisense	-4.6516	-6.59221	-6.60219	-6.83538	-3.45401	-6.57312	-6.02855	-6.45795	-6.25824	-6.59308	-5.51942	-6.03213	-3.0552	-6.23454	-4.42962	-4.1198	-3.30119	-6.03222	-6.05552	-2.65939	-6.60322
ENSG00000254223	-1.18984	0.00180211	RP11-419K12.1	lincRNA	-6.23656	-1.46293	-2.90175	-4.02802	-2.35447	-0.269343	-4.44359	-3.65059	-6.25824	-1.16681	-3.19749	-0.304206	-1.61462	-1.02509	-6.01459	0.128132	-6.10854	-6.03222	-2.88559	-5.46675	-2.51575
ENSG00000254854	0.762149	0.00182296	CTD-2523D13.2	antisense	-3.42921	-4.27028	-6.60219	-6.83538	-3.09144	-6.57312	-4.44359	-6.45795	-6.25824	-6.59308	-5.51942	-6.03213	-4.27759	-6.23454	-6.01459	-6.44172	-4.52358	-6.03222	-6.05552	-2.65939	-6.60322
ENSG00000259634	1.76202	0.00184044	RP11-529H20.5	sense_overlapping	-0.0868158	-6.59221	-6.60219	-6.83538	-6.26137	-6.57312	0.0375387	-6.45795	-0.585815	-6.59308	0.095288	-6.03213	2.50814	-6.23454	-6.01459	-6.44172	-6.10854	-6.03222	0.353874	-0.51255	-6.60322
ENSG00000266049	0.662026	0.00195948	RP11-703M24.5	antisense	-1.48168	-3.13278	-2.90175	-1.34352	-1.40338	-3.4032	-1.07435	-4.13602	-2.17078	-3.78572	-0.764534	-1.7842	-1.2187	-1.19014	-1.15661	-2.74128	-1.06415	-2.86229	-2.59609	-0.943185	-3.43329
ENSG00000245719	-1.03344	0.00200065	RP11-34F13.2	lincRNA	-2.53612	-2.50475	-6.60219	-2.92849	-6.26137	-2.3252	-3.70662	-4.13602	-6.25824	-2.06951	-5.51942	-3.22477	-0.370699	-3.42718	-6.01459	-2.1938	-3.78662	-1.78429	-0.926234	-5.46675	-2.35529
ENSG00000255649	-0.806043	0.00201622	RP11-502N13.2	antisense	-6.23656	-2.68532	-6.60219	-4.51345	-4.6764	-6.57312	-6.02855	-2.99852	-6.25824	-4.27115	-5.51942	-6.03213	-5.86255	-4.64958	-6.01459	-3.63437	-6.10854	-3.71029	-6.05552	-5.46675	-2.2109
ENSG00000234961	0.620008	0.00209627	RP11-124N14.3	antisense	1.34087	1.27197	1.89367	0.582475	0.609	0.168343	2.14638	1.64534	-0.327503	-0.978366	1.3754	-0.477538	1.92535	-0.16845	0.643625	-0.101874	2.44988	0.787964	1.04252	3.02109	-0.875297
ENSG00000273321	0.88698	0.00209745	RP11-621L6.3	lincRNA	-6.23656	-6.59221	-2.51472	-6.83538	-2.01344	-6.57312	-3.2212	-6.45795	-3.45089	-6.59308	-5.51942	-6.03213	-5.86255	-6.23454	-6.01459	-6.44172	-3.30119	-6.03222	-6.05552	-5.46675	-3.79586
ENSG00000256947	0.944655	0.00213782	RP11-64D24.2	antisense	-6.23656	-6.59221	-5.01722	-4.51345	-3.45401	-6.57312	-2.56912	-6.45795	-3.93631	-6.59308	-5.51942	-3.22477	-3.0552	-6.23454	-2.31415	-6.44172	-6.10854	-6.03222	-6.05552	-2.29682	-6.60322
ENSG00000257000	0.753408	0.00218733	RP13-820C6.2	antisense	-3.91463	-5.00725	-4.28026	-6.83538	-4.6764	-6.57312	-3.70662	-4.87298	-6.25824	-6.59308	-3.19749	-6.03213	-4.27759	-4.64958	-6.01459	-6.44172	-6.10854	-6.03222	-6.05552	-2.29682	-6.60322
ENSG00000271966	1.89859	0.00224891	RP11-7F18.2	lincRNA	0.449938	-6.59221	-6.60219	-6.83538	-6.26137	-6.57312	-0.0978131	-6.45795	0.839792	-6.59308	-5.51942	-6.03213	1.45033	-6.23454	-6.01459	-6.44172	1.88581	-6.03222	2.10939	-0.181344	-6.60322
ENSG00000237775	0.979444	0.00237245	DDR1-AS1	antisense	-3.42921	-6.59221	-3.79483	-6.83538	-1.86905	-3.76577	-2.32811	-6.45795	-2.35135	-6.59308	-3.93446	-6.03213	-3.0552	-3.42718	-1.76666	-3.63437	-6.10854	-6.03222	-2.35508	-5.46675	-6.60322
ENSG00000266821	0.996723	0.0023871	RP11-6N17.2	lincRNA	-2.53612	-2.89177	-3.14275	-4.02802	-6.26137	-6.57312	-2.32811	-6.45795	-6.25824	-6.59308	-1.81898	-6.03213	-1.77509	-6.23454	-2.55515	-6.44172	-6.10854	-6.03222	-6.05552	-5.46675	-6.60322
ENSG00000262966	0.858566	0.00253334	RP11-85B7.2	antisense	-6.23656	-6.59221	-6.60219	-6.83538	-3.45401	-6.57312	-6.02855	-6.45795	-3.45089	-3.78572	-5.51942	-6.03213	-1.95566	-6.23454	-3.69266	-6.44172	-3.78662	-6.03222	-4.47055	-2.65939	-6.60322
ENSG00000264125	0.861358	0.0025491	RP11-354P11.4	antisense	-2.77713	-6.59221	-2.6953	-4.51345	-3.45401	-6.57312	-3.2212	-3.28802	-3.93631	-6.59308	-5.51942	-6.03213	-4.27759	-6.23454	-1.49102	-2.74128	-3.30119	-6.03222	-6.05552	-5.46675	-4.28129
ENSG00000273162	1.28599	0.00268149	RP11-108L7.15	lincRNA	-0.508642	-3.78486	-6.60219	-6.83538	0.681149	-6.57312	-2.32811	-3.65059	0.561939	-6.59308	-5.51942	-6.03213	-1.77509	-6.23454	-6.01459	-6.44172	-6.10854	-6.03222	-6.05552	-5.46675	-6.60322
ENSG00000223571	0.798165	0.00268856	DHRSX-IT1	sense_intronic	-0.810298	-1.38276	-1.64799	-2.08049	-0.706776	-2.3252	-0.536697	-2.21002	-1.30404	-6.59308	-0.99586	-4.44716	-1.2187	-0.742686	-0.970192	-2.74128	-0.89909	-2.33178	-3.73359	-2.65939	-2.07966
ENSG00000246228	0.918794	0.0027735	CASC8	antisense	-6.23656	-3.78486	-3.43226	-3.37595	-3.93944	-6.57312	-2.56912	-6.45795	-6.25824	-6.59308	-2.71207	-3.22477	-3.0552	-6.23454	-3.20723	-6.44172	-3.30119	-6.03222	-6.05552	-2.65939	-6.60322
ENSG00000268544	0.693565	0.00297339	RP11-277L2.4	lincRNA	-4.6516	-6.59221	-6.60219	-6.83538	-3.93944	-6.57312	-3.2212	-4.87298	-4.67328	-6.59308	-2.3495	-6.03213	-5.86255	-6.23454	-6.01459	-6.44172	-6.10854	-6.03222	-6.05552	-5.46675	-6.60322
ENSG00000258735	0.75994	0.00305212	LINC00637	lincRNA	-6.23656	-6.59221	-3.79483	-6.83538	-3.45401	-6.57312	-6.02855	-6.45795	-6.25824	-6.59308	-2.71207	-6.03213	-5.86255	-6.23454	-3.20723	-3.63437	-3.30119	-6.03222	-6.05552	-5.46675	-6.60322
ENSG00000267089	0.726766	0.00306309	CTC-499B15.8	lincRNA	-3.42921	-5.00725	-4.28026	-6.83538	-2.80193	-4.2512	-6.02855	-6.45795	-6.25824	-6.59308	-3.19749	-6.03213	-4.27759	-6.23454	-3.20723	-6.44172	-6.10854	-6.03222	-4.47055	-3.88178	-5.01826
ENSG00000261786	0.993546	0.003074	RP4-555D20.2	lincRNA	-1.98864	-6.59221	-3.79483	-6.83538	-6.26137	-6.57312	-6.02855	-3.65059	-6.25824	-6.59308	-2.71207	-6.03213	-0.733269	-6.23454	-6.01459	-6.44172	-2.4081	-6.03222	-6.05552	-5.46675	-6.60322
ENSG00000207955	0.954194	0.003103	MIR219-2	lincRNA	-2.53612	-6.59221	-6.60219	-6.83538	-3.45401	-6.57312	-6.02855	-6.45795	-2.35135	-3.13364	-2.71207	-3.22477	-5.86255	-6.23454	-1.92712	-6.44172	-2.20165	-6.03222	-6.05552	-5.46675	-6.60322
ENSG00000242125	0.589484	0.0032023	SNHG3	sense_intronic	6.53761	4.26032	6.44511	4.00461	4.55001	4.51765	6.51424	4.79531	5.661	4.42582	6.98217	3.92643	6.30078	3.76405	5.14843	5.44968	3.85291	4.92851	3.55366	3.49036	4.30292
ENSG00000266045	1.32316	0.00324229	RP11-466P24.7	lincRNA	-3.42921	-2.89177	-6.60219	-6.83538	-6.26137	-6.57312	-1.63623	-6.45795	-6.25824	-6.59308	1.19482	-6.03213	-2.40312	-6.23454	1.2428	-6.44172	-1.86062	-3.22486	-6.05552	-5.46675	-6.60322
ENSG00000231826	1.02155	0.00331582	AC016735.2	lincRNA	-1.48168	-6.59221	-0.624906	-1.05402	1.15649	-1.36367	0.079974	-0.0485562	3.16172	0.148391	1.46926	-1.38827	0.766805	-0.67995	0.175238	-2.35426	-1.15435	-2.86229	-3.73359	1.37874	1.87656
ENSG00000259341	0.749042	0.0034578	RP11-20G13.1	lincRNA	-3.91463	-6.59221	-5.01722	-3.66545	-2.80193	-6.57312	-3.70662	-6.45795	-4.67328	-6.59308	-5.51942	-6.03213	-5.86255	-6.23454	-6.01459	-6.44172	-6.10854	-6.03222	-6.05552	-2.65939	-6.60322
ENSG00000236830	0.605434	0.00353674	CBR3-AS1	processed_transcript	1.12976	0.0659995	0.386498	-0.90464	0.367991	-1.52873	2.06421	-0.391858	0.860701	-1.54868	0.502946	-1.38827	1.72991	0.506928	-0.286666	-0.291977	0.761821	-0.199325	-1.80759	-1.21882	0.912482
ENSG00000226383	0.922715	0.00354965	AC093375.1	lincRNA	-3.91463	-2.68532	-3.14275	-6.83538	-2.1739	-6.57312	-6.02855	-4.87298	-3.45089	-6.59308	-1.81898	-6.03213	-5.86255	-6.23454	-2.55515	-6.44172	-6.10854	-6.03222	-6.05552	-5.46675	-6.60322
ENSG00000233393	0.931327	0.00356877	AP000688.29	lincRNA	-1.713	-3.78486	-3.14275	-3.37595	-6.26137	-6.57312	-1.38469	-6.45795	-4.67328	-6.59308	-2.71207	-6.03213	-5.86255	-6.23454	-3.69266	-6.44172	-6.10854	-6.03222	-3.73359	-2.65939	-6.60322
ENSG00000250101	0.862315	0.00374534	RP11-1252I4.2	antisense	-3.06664	-3.42229	-4.28026	-6.83538	-3.09144	-2.66623	-3.70662	-6.45795	-6.25824	-6.59308	-3.19749	-6.03213	-2.16211	-6.23454	-2.84466	-4.1198	-1.86062	-3.71029	-6.05552	-5.46675	-6.60322
ENSG00000258168	0.920977	0.00383466	RP11-588H23.3	antisense	-6.23656	-6.59221	-3.79483	-4.02802	-6.26137	-4.2512	-3.2212	-4.87298	-3.45089	-6.59308	-5.51942	-6.03213	-0.577149	-6.23454	-1.76666	-6.44172	-3.30119	-4.44725	-6.05552	-3.88178	-6.60322
ENSG00000261441	0.957734	0.00392427	RP11-217B1.2	antisense	-0.74471	-2.89177	-3.14275	-3.13494	1.15649	-2.04956	-0.899267	-2.99852	-2.5578	-6.59308	-1.81898	-2.33169	-2.40312	-1.71098	-0.0838488	-6.44172	-0.0424541	-1.6399	-0.770115	-0.82289	-2.35529
ENSG00000257808	0.880855	0.00397056	RP11-1136G11.8	lincRNA	-3.06664	-6.59221	-5.01722	-6.83538	-6.26137	-6.57312	-3.70662	-6.45795	-4.67328	-6.59308	-5.51942	-6.03213	-2.40312	-6.23454	-3.69266	-6.44172	-6.10854	-2.33178	-6.05552	-2.65939	-6.60322
ENSG00000261597	1.75449	0.00399494	RP11-353B9.1	sense_overlapping	-6.23656	1.58271	0.516755	-6.83538	0.878186	-6.57312	0.510608	-6.45795	-0.585815	-2.50561	1.10993	-6.03213	-5.86255	-6.23454	0.2522	-6.44172	0.266496	-1.50865	-0.383092	-0.109195	-6.60322
ENSG00000255864	0.920795	0.00429209	RP11-444D3.1	lincRNA	-3.42921	-3.42229	-3.79483	-6.83538	-6.26137	-6.57312	-2.56912	-3.65059	-2.35135	-4.27115	-5.51942	-6.03213	-0.247842	-6.23454	-1.92712	-3.63437	-3.78662	-6.03222	-6.05552	-5.46675	-6.60322
ENSG00000260302	0.960271	0.00435621	RP11-973H7.1	lincRNA	-6.23656	-6.59221	-3.14275	-6.83538	-3.45401	-6.57312	-6.02855	-6.45795	-6.25824	-6.59308	-1.81898	-3.22477	-1.77509	-6.23454	-3.20723	-6.44172	-2.4081	-6.03222	-2.35508	-5.46675	-6.60322
ENSG00000246375	0.840692	0.00445101	RP11-10L7.1	lincRNA	-0.681974	-2.34428	-1.95833	-3.37595	-0.58894	-1.61893	-3.2212	-4.13602	-3.45089	-6.59308	-2.71207	-2.5727	-1.2187	-3.91261	-1.92712	-2.98229	-1.86062	-6.03222	-6.05552	-3.14482	-2.07966
ENSG00000269275	0.950854	0.0045705	CTD-2105E13.15	antisense	-6.23656	-6.59221	-6.60219	-6.83538	-2.80193	-6.57312	-6.02855	-6.45795	-3.45089	-6.59308	-5.51942	-6.03213	-3.0552	-6.23454	-1.49102	-6.44172	-1.86062	-6.03222	-2.14863	-5.46675	-6.60322
ENSG00000253364	1.42339	0.00458913	RP11-731F5.2	lincRNA	-3.42921	-4.27028	-2.51472	-6.83538	-3.45401	-4.98816	1.32018	-3.65059	-6.25824	-6.59308	-3.93446	-6.03213	0.203538	-6.23454	3.65961	-2.74128	-0.0861755	-6.03222	-0.327597	-5.46675	-4.28129
ENSG00000271065	0.740303	0.00472	RP11-607P23.1	antisense	-3.91463	-6.59221	-3.43226	-3.66545	-3.93944	-3.4032	-2.56912	-4.13602	-6.25824	-6.59308	-5.51942	-6.03213	-3.54062	-6.23454	-2.84466	-6.44172	-3.78662	-6.03222	-6.05552	-5.46675	-6.60322
ENSG00000259468	-0.803109	0.00478126	RP11-1084A12.2	antisense	-6.23656	-2.68532	-1.4729	-1.62592	-1.61751	-1.08127	-2.32811	0.171409	-3.08832	-2.34515	-1.81898	-0.417417	-5.86255	-0.351896	-2.55515	-1.39733	-1.25056	-0.149572	-1.10132	-1.76631	-1.74524
ENSG00000241728	0.747407	0.00480198	AP001062.8	sense_overlapping	1.82413	0.175972	0.139281	-0.606558	1.18985	-0.13018	0.571362	-0.785522	4.46029	2.15847	1.55739	-1.7842	0.645243	2.55662	0.360453	-1.91816	1.69236	0.838149	-1.6632	1.6728	-0.263368
ENSG00000271958	0.713379	0.0049073	RP11-617D20.2	lincRNA	-6.23656	-5.00725	-3.79483	-6.83538	-4.6764	-6.57312	-6.02855	-6.45795	-6.25824	-6.59308	-3.93446	-3.22477	-3.54062	-6.23454	-4.42962	-6.44172	-3.78662	-6.03222	-6.05552	-3.14482	-6.60322
ENSG00000225745	0.801536	0.00512111	PLAC4	antisense	-6.23656	-6.59221	-6.60219	-6.83538	-3.45401	-6.57312	-0.473962	-4.13602	-6.25824	-6.59308	-5.51942	-6.03213	-4.27759	-6.23454	-3.20723	-6.44172	-6.10854	-6.03222	-6.05552	-3.88178	-6.60322
ENSG00000262001	1.23247	0.00516845	DLGAP1-AS2	antisense	1.12976	-6.59221	-0.0630275	-6.83538	-0.111618	-1.71514	1.45527	-0.903358	0.707544	-3.78572	-0.390139	1.02316	0.613182	-1.47965	0.904277	0.815664	-0.823141	0.654285	-6.05552	-2.65939	-1.04863
ENSG00000229196	0.847588	0.00520666	RP11-775D22.2	antisense	-2.77713	-6.59221	-6.60219	-6.83538	-3.45401	-6.57312	-6.02855	-6.45795	-3.93631	-5.00811	-5.51942	-6.03213	-2.16211	-6.23454	-1.76666	-6.44172	-6.10854	-6.03222	-3.24816	-5.46675	-6.60322
ENSG00000223669	-0.902581	0.00525986	RP11-93B14.4	antisense	-6.23656	-1.94836	-6.60219	-2.92849	-6.26137	-6.57312	-6.02855	-3.65059	-2.5578	-1.83819	-2.71207	-3.22477	-5.86255	-1.37656	-6.01459	-3.63437	-6.10854	-6.03222	-2.88559	-5.46675	-5.01826
ENSG00000233073	0.681605	0.00527166	AC005009.2	antisense	-3.06664	-5.00725	-2.51472	-4.02802	-6.26137	-6.57312	-3.70662	-6.45795	-6.25824	-6.59308	-5.51942	-6.03213	-3.0552	-6.23454	-4.42962	-6.44172	-6.10854	-6.03222	-6.05552	-5.46675	-6.60322
ENSG00000232490	0.777465	0.00541872	OSBPL10-AS1	antisense	0.557853	-1.23466	-1.0476	-3.37595	-2.80193	-3.76577	0.765865	-1.59997	-0.235873	-1.03849	1.30076	-0.477538	0.0681857	0.394818	2.03526	-0.887135	2.07633	-0.746813	0.712667	-0.943185	-2.35529
ENSG00000272917	0.910847	0.00542236	RP11-705C15.5	processed_transcript	-3.42921	-3.42229	-1.95833	-2.92849	-6.26137	-6.57312	-6.02855	-6.45795	-3.45089	-6.59308	-5.51942	-6.03213	-1.2187	-6.23454	-1.62227	-6.44172	-2.93862	-6.03222	-6.05552	-5.46675	-5.01826
ENSG00000240040	1.04738	0.00589564	AC096579.13	processed_transcript	-3.42921	-6.59221	-6.60219	-6.83538	-0.428475	0.460299	-2.32811	-6.45795	-6.25824	-6.59308	-2.71207	-6.03213	-3.54062	-6.23454	-2.1077	-6.44172	-3.78662	-6.03222	-6.05552	-5.46675	-6.60322
ENSG00000272361	0.95125	0.00594606	GS1-166A23.2	lincRNA	-2.53612	-2.34428	-6.60219	-6.83538	-1.7378	-6.57312	-6.02855	-6.45795	-6.25824	-6.59308	-5.51942	-6.03213	-3.0552	-6.23454	-6.01459	-6.44172	-2.4081	-6.03222	-6.05552	-1.07443	-6.60322
ENSG00000221857	-0.889546	0.00600092	CTD-2527I21.4	processed_transcript	-6.23656	-2.34428	-6.60219	-6.83538	-6.26137	-4.98816	-6.02855	-0.575304	-6.25824	-2.89264	-3.93446	-3.22477	-5.86255	-3.42718	-3.69266	-3.2718	-6.10854	-2.86229	-6.05552	-5.46675	-6.60322
ENSG00000205837	1.00197	0.00602824	LINC00487	lincRNA	-0.564138	-1.73423	-3.79483	-1.47783	-2.80193	-6.57312	1.04827	-2.55106	-2.17078	-4.27115	-3.93446	-6.03213	0.203538	-6.23454	-2.31415	-2.74128	-1.86062	-2.57278	-6.05552	-2.65939	-3.14379
ENSG00000235033	-0.836895	0.00603877	RP11-61I13.3	antisense	-6.23656	-6.59221	-6.60219	-4.02802	-6.26137	-3.76577	-6.02855	-6.45795	-6.25824	-2.89264	-5.51942	-1.07793	-5.86255	-6.23454	-6.01459	-6.44172	-6.10854	-2.57278	-6.05552	-5.46675	-2.35529
ENSG00000225493	-0.762265	0.00605758	LINC01107	lincRNA	-6.23656	-3.42229	-5.01722	-3.13494	-6.26137	-3.76577	-6.02855	-2.21002	-6.25824	-6.59308	-5.51942	-6.03213	-3.0552	-2.77511	-4.42962	-3.63437	-6.10854	-3.22486	-6.05552	-5.46675	-2.69633
ENSG00000225916	0.73013	0.00633242	AC007879.4	lincRNA	-6.23656	-6.59221	-6.60219	-6.83538	-3.93944	-6.57312	-4.44359	-4.13602	-4.67328	-6.59308	-5.51942	-6.03213	-2.69263	-6.23454	-2.31415	-6.44172	-3.30119	-6.03222	-6.05552	-5.46675	-4.28129
ENSG00000235664	0.711231	0.0064375	AC005682.8	lincRNA	-3.06664	-6.59221	-3.14275	-4.51345	-6.26137	-4.2512	-6.02855	-6.45795	-3.45089	-4.27115	-3.19749	-6.03213	-3.0552	-6.23454	-6.01459	-6.44172	-3.78662	-6.03222	-6.05552	-5.46675	-6.60322
ENSG00000259994	1.52383	0.00644124	RP11-305E6.4	sense_overlapping	1.11217	-6.59221	-6.60219	-6.83538	-6.26137	-6.57312	-6.02855	-6.45795	-6.25824	-6.59308	0.411315	-6.03213	1.00781	-6.23454	0.753598	-6.44172	0.659641	0.787964	-6.05552	-5.46675	-6.60322
ENSG00000269938	0.850782	0.00660781	RP11-214K3.20	sense_intronic	-1.98864	-6.59221	-6.60219	-6.83538	-6.26137	-6.57312	-6.02855	-6.45795	-6.25824	-3.78572	-2.71207	-6.03213	-2.40312	-6.23454	-3.69266	-6.44172	-6.10854	-6.03222	-6.05552	-2.65939	-6.60322
ENSG00000248943	0.77769	0.00662676	RP11-1026M7.3	lincRNA	-6.23656	-3.13278	-4.28026	-6.83538	-3.45401	-6.57312	-3.2212	-6.45795	-6.25824	-6.59308	-3.19749	-6.03213	-2.40312	-3.42718	-3.69266	-6.44172	-4.52358	-6.03222	-6.05552	-5.46675	-6.60322
ENSG00000230438	0.60164	0.00666233	RP11-420G6.4	lincRNA	3.49306	2.68158	3.85827	1.93611	3.1459	3.84999	4.34974	3.0319	3.82524	2.11773	6.34283	3.85814	4.07261	1.56636	5.72899	4.52478	6.66604	5.28576	4.62835	4.26627	3.93109
ENSG00000271980	1.18138	0.00673782	CTD-2256P15.4	antisense	-0.951161	-6.59221	-1.39273	-2.19152	-6.26137	-1.92927	-6.02855	-6.45795	-2.17078	-6.59308	-2.3495	-6.03213	-0.577149	-6.23454	-2.55515	-6.44172	-6.10854	-6.03222	-6.05552	0.205679	-2.51575
ENSG00000265787	0.793923	0.00679754	CYP4F35P	lincRNA	-0.455203	-0.252362	0.0843142	-1.22067	-1.05191	-2.18081	-0.145907	-1.93439	-2.5578	-4.27115	0.457858	-2.5727	0.0681857	-2.14708	1.92205	0.889193	-0.380623	-1.27733	-6.05552	-1.37928	-1.64902
ENSG00000235077	0.665933	0.00700524	AC073842.19	antisense	-2.77713	-4.27028	-3.79483	-6.83538	-3.09144	-3.76577	-2.12166	-4.87298	-1.73468	-2.50561	-1.43196	-4.44716	-2.40312	-3.06461	-1.37073	-2.1938	-1.86062	-2.33178	-2.35508	-1.76631	-2.51575
ENSG00000258554	0.760621	0.00710532	RP11-973D8.4	antisense	-1.98864	-6.59221	-6.60219	-6.83538	-2.80193	-6.57312	-3.2212	-4.87298	-6.25824	-6.59308	-5.51942	-3.7102	-3.54062	-6.23454	-6.01459	-6.44172	-3.78662	-6.03222	-6.05552	-5.46675	-6.60322
ENSG00000259438	-0.736325	0.00717313	CTD-2650P22.1	lincRNA	-3.42921	-3.78486	-3.79483	-3.13494	-6.26137	-1.52873	-6.02855	-4.13602	-6.25824	-3.78572	-2.71207	-2.5727	-2.40312	-3.42718	-3.20723	-1.79787	-3.30119	-1.38836	-2.14863	-5.46675	-2.90278
ENSG00000271320	0.818892	0.00727363	RP11-1152H14.1	lincRNA	-2.53612	-6.59221	-3.79483	-2.92849	-6.26137	-6.57312	-6.02855	-6.45795	-6.25824	-6.59308	-1.61253	-6.03213	-5.86255	-6.23454	-6.01459	-6.44172	-3.30119	-6.03222	-6.05552	-2.65939	-6.60322
ENSG00000226869	0.601353	0.0077027	LHFPL3-AS1	processed_transcript	-6.23656	-5.00725	-5.01722	-6.83538	-4.6764	-4.98816	-4.44359	-4.87298	-6.25824	-6.59308	-3.93446	-6.03213	-4.27759	-6.23454	-3.69266	-4.85676	-2.4081	-6.03222	-6.05552	-3.88178	-5.01826
ENSG00000273160	0.711235	0.00770866	RP11-104L21.3	lincRNA	-2.32967	-1.94836	-2.51472	-1.22067	-1.86905	-2.66623	-2.85863	-6.45795	-3.45089	-5.00811	-2.3495	-4.44716	-2.69263	-3.06461	-0.588321	-2.74128	-1.46469	-2.86229	-4.47055	-1.55986	-5.01826
ENSG00000230392	0.593663	0.00773149	RP5-1139I1.1	lincRNA	-6.23656	-6.59221	-6.60219	-4.51345	-3.93944	-6.57312	-6.02855	-6.45795	-4.67328	-6.59308	-3.93446	-6.03213	-3.54062	-6.23454	-6.01459	-6.44172	-3.78662	-6.03222	-6.05552	-5.46675	-6.60322
ENSG00000233725	0.77898	0.00779207	LINC00284	lincRNA	-6.23656	-4.27028	-6.60219	-4.02802	-3.93944	-6.57312	-3.70662	-6.45795	-6.25824	-6.59308	-5.51942	-6.03213	-2.40312	-6.23454	-2.84466	-6.44172	-3.30119	-6.03222	-6.05552	-3.14482	-6.60322
ENSG00000233852	0.784679	0.00790899	AC005304.1	lincRNA	-3.06664	-6.59221	-3.43226	-6.83538	-3.93944	-6.57312	-4.44359	-6.45795	-6.25824	-6.59308	-5.51942	-3.22477	-2.40312	-6.23454	-3.69266	-3.63437	-2.64911	-6.03222	-6.05552	-5.46675	-4.28129
ENSG00000271888	1.09339	0.00795883	RP11-560J1.2	lincRNA	-6.23656	-6.59221	-0.820827	-6.83538	-0.8351	-6.57312	-6.02855	-6.45795	-1.73468	-0.662339	-2.71207	-6.03213	-5.86255	-6.23454	-0.885303	-6.44172	-6.10854	-6.03222	-6.05552	-5.46675	-6.60322
ENSG00000253701	0.895423	0.00818361	AL928768.3	lincRNA	-2.77713	-2.34428	-6.60219	-4.51345	-2.01344	-4.98816	-1.94109	-4.13602	-2.01031	-2.89264	-3.19749	-6.03213	-2.16211	-6.23454	-0.286666	-2.98229	-1.71623	-6.03222	-6.05552	-5.46675	-5.01826
ENSG00000273382	1.59774	0.00832825	RP5-1065J22.8	antisense	-0.621853	-6.59221	-6.60219	-6.83538	-6.26137	0.321694	0.3113	-6.45795	-1.21385	0.325787	1.59952	-6.03213	1.10323	-6.23454	-1.49102	-6.44172	0.430616	-6.03222	-0.172874	-1.37928	-6.60322
ENSG00000273080	1.17987	0.00835038	RP11-301O19.1	antisense	-6.23656	-6.59221	-2.20987	-6.83538	-1.30717	-6.57312	-1.27366	-6.45795	-6.25824	-6.59308	-5.51942	-0.540274	-5.86255	-6.23454	-0.729184	-6.44172	-0.380623	-6.03222	-6.05552	-5.46675	-6.60322
ENSG00000224137	1.00553	0.00838381	AC079767.4	lincRNA	-3.91463	-0.402387	-2.51472	-4.02802	-2.80193	-6.57312	-1.17057	-6.45795	-6.25824	-6.59308	-1.81898	-6.03213	-1.10766	-3.06461	0.175238	-2.53483	-2.20165	-6.03222	-3.24816	-2.65939	-3.79586
ENSG00000230830	1.39031	0.00838799	ARPP21-AS1	antisense	2.78303	2.97954	4.1849	-2.74791	4.78644	-3.76577	-1.27366	-3.65059	-0.831976	-4.27115	5.5433	1.08681	3.13463	0.707975	2.4325	0.326461	4.78096	2.75242	4.50003	3.76447	5.29198
ENSG00000239920	0.642006	0.00891111	AC015691.13	antisense	-3.42921	-6.59221	-3.43226	-4.51345	-4.6764	-6.57312	-3.2212	-6.45795	-6.25824	-6.59308	-5.51942	-4.44716	-5.86255	-6.23454	-6.01459	-6.44172	-6.10854	-6.03222	-6.05552	-3.14482	-6.60322
ENSG00000234184	1.13488	0.00895983	RP5-887A10.1	lincRNA	-1.37858	-0.252362	-0.820827	-6.83538	-2.35447	-6.57312	-1.94109	-6.45795	-6.25824	-2.89264	-5.51942	-6.03213	-0.0296617	-6.23454	-1.37073	-3.63437	-1.86062	-3.22486	-6.05552	-5.46675	-6.60322
ENSG00000260401	-1.1554	0.00896147	RP11-800A3.4	sense_overlapping	-1.98864	-6.59221	-6.60219	-3.13494	-6.26137	-6.57312	-1.78062	-0.966094	-6.25824	-2.20076	-5.51942	-0.987733	-2.40312	-3.42718	-6.01459	-0.174937	-6.10854	-0.35979	-1.19754	-5.46675	-1.31782
ENSG00000267670	0.6539	0.00896324	CTB-55O6.4	antisense	-2.1491	-3.78486	-5.01722	-4.02802	-1.61751	-3.11369	-1.50499	-6.45795	-2.5578	-3.78572	-1.61253	-3.22477	-1.61462	-3.42718	-1.92712	-3.63437	-1.71623	-2.12532	-2.59609	-2.65939	-2.90278
ENSG00000230394	0.634613	0.00952853	RP11-692P14.1	lincRNA	-3.91463	-6.59221	-4.28026	-6.83538	-6.26137	-6.57312	-3.70662	-6.45795	-6.25824	-6.59308	-3.19749	-6.03213	-5.86255	-6.23454	-6.01459	-4.1198	-3.78662	-6.03222	-6.05552	-3.88178	-4.28129
ENSG00000256195	0.703653	0.00966921	RP11-64D24.4	antisense	-6.23656	-3.13278	-3.79483	-6.83538	-6.26137	-6.57312	-3.2212	-6.45795	-6.25824	-6.59308	-5.51942	-6.03213	-3.54062	-6.23454	-3.20723	-6.44172	-3.30119	-6.03222	-6.05552	-5.46675	-6.60322
ENSG00000245729	0.657786	0.00977592	RP11-480D4.1	lincRNA	-3.91463	-6.59221	-3.79483	-4.02802	-6.26137	-6.57312	-6.02855	-6.45795	-6.25824	-5.00811	-2.71207	-6.03213	-5.86255	-6.23454	-2.31415	-4.85676	-4.52358	-6.03222	-6.05552	-3.88178	-6.60322
ENSG00000231873	0.596351	0.00988573	RP11-761N21.1	lincRNA	-3.91463	-6.59221	-5.01722	-4.02802	-6.26137	-6.57312	-6.02855	-6.45795	-6.25824	-6.59308	-3.19749	-6.03213	-4.27759	-6.23454	-3.20723	-6.44172	-6.10854	-6.03222	-6.05552	-5.46675	-6.60322

## Sheet: Table S3_C
		The table contain the list of 258 NH-HeH relapse-specific lncRNAs between ID and REL samples obtained using LIMMA voom
Geneid	logFC	Pval	Gene_sym	Gene_type	AE02_ID	AE02_REL	AE04_ID	AE04_REL	AE05_ID	AE05_REL	AL03_ID	AL03_REL	AL27_REL	PE07_ID	PE07_REL	PL07_REL	PL09_ID	PL09_REL	PL10_ID	PL10_REL
ENSG00000228271	2.07915	5.2e-06	RP11-513G11.2	lincRNA	-1.18688	-5.87074	-1.59448	-6.32616	-0.368055	-6.42162	-2.70654	-6.36355	-6.13954	-5.84889	-6.34214	-6.54673	-0.842881	-3.60566	-0.447854	-6.31221
ENSG00000229983	-1.32488	1.03e-05	RP11-15I11.2	lincRNA	-6.23127	-2.1703	-6.11804	-4.00424	-6.34533	-2.96219	-6.40698	-4.04162	-2.96961	-5.84889	-2.88271	-4.96177	-6.33473	-3.60566	-6.28074	-4.72724
ENSG00000234423	1.9309	5.12e-05	AC019118.2	lincRNA	1.91338	-3.06338	-1.16384	-6.32616	3.3603	-1.66673	-0.625617	-1.83999	-2.96961	0.720963	-2.09421	-0.48064	0.941391	-2.16509	2.936	-3.50485
ENSG00000216863	1.81786	5.35e-05	LY86-AS1	antisense	-1.98335	-3.06338	1.06187	-6.32616	-0.23681	-6.42162	-1.45278	-1.83999	-3.33218	0.526147	-3.53478	-2.02317	-0.780145	-4.82805	-1.23635	-6.31221
ENSG00000266385	1.54655	6.1e-05	RP11-227G15.8	lincRNA	-2.53083	-5.87074	-3.79611	-6.32616	-0.853482	-3.61427	-1.65209	-6.36355	-6.13954	-5.84889	-6.34214	-6.54673	-3.16481	-6.41301	-2.37385	-6.31221
ENSG00000267016	0.933728	8.37e-05	RP11-75C10.9	antisense	2.78275	-0.378882	2.77981	0.931224	1.40286	0.0213219	3.51932	-0.134729	0.489821	3.01839	1.47164	1.85841	2.52635	1.10269	2.35225	1.4225
ENSG00000223842	1.38537	9.5e-05	RP11-135J2.3	lincRNA	-3.42392	-5.87074	-2.65861	-4.00424	-2.09741	-6.42162	-1.88341	-6.36355	-6.13954	-5.84889	-6.34214	-4.96177	-2.42784	-6.41301	-3.47339	-6.31221
ENSG00000248714	0.853111	0.000102386	RP11-1079K10.3	lincRNA	0.824009	-1.62281	1.0009	-0.653739	0.573529	-1.21217	0.691056	-1.23427	-0.584947	0.173475	-1.05674	0.273449	0.884435	-0.390646	1.80141	-1.0268
ENSG00000245849	0.807368	0.000115577	RAD51-AS1	processed_transcript	3.92986	1.16269	3.44992	2.37774	3.06193	1.584	3.18361	0.755393	2.41888	2.02762	0.896267	1.52473	3.63825	2.65576	3.06577	1.05412
ENSG00000253878	1.40346	0.00014057	RP11-347C18.3	sense_intronic	0.178117	-1.11585	3.05938	-0.968612	1.13848	-1.77777	0.626446	-0.0967616	-0.930083	0.417894	-2.88271	-4.96177	1.46617	-0.0379746	2.19093	-1.10275
ENSG00000245904	0.96976	0.000144143	RP11-796E2.4	antisense	2.05875	0.787476	3.17888	0.707259	1.64902	-0.313097	0.905906	0.265809	0.269855	0.837608	-1.58725	0.592822	1.79969	-1.12761	2.03667	-0.757618
ENSG00000226696	1.08901	0.000147484	LENG8-AS1	antisense	0.307885	0.358083	2.46316	0.44202	2.34466	-0.444342	1.15527	-1.60866	-1.61597	-0.294304	-1.69828	-1.41745	1.96447	-0.263267	1.50716	-1.18292
ENSG00000249073	1.74643	0.000150319	CTD-2131I18.1	lincRNA	-3.06135	-5.87074	0.221811	-6.32616	-1.13588	-6.42162	-3.23705	-6.36355	-6.13954	-5.84889	-6.34214	-6.54673	-2.08681	-2.32555	-1.32655	-6.31221
ENSG00000205041	0.948073	0.000157818	CTC-425O23.2	sense_intronic	2.50682	-1.62281	2.2871	1.05754	2.18214	-0.0122306	2.3711	-0.530658	1.53994	1.65095	0.691285	1.59793	2.81247	1.34854	3.25259	1.03652
ENSG00000230590	0.740679	0.000163395	FTX	lincRNA	3.11524	0.572208	3.9944	1.29589	3.21117	1.41758	3.50741	1.87007	1.66136	3.46626	1.95707	2.62069	3.31452	2.21998	2.36671	2.51752
ENSG00000248245	1.40897	0.000186192	CTB-49A3.2	antisense	-1.58742	-5.87074	-2.4176	-6.32616	-1.70148	-6.42162	-4.82201	-3.55619	-4.55457	-3.52696	-4.75718	-6.54673	-3.16481	-6.41301	-1.23635	-4.72724
ENSG00000241490	1.63863	0.000188252	RP11-553L6.2	antisense	-1.70771	-3.06338	0.11078	-2.2387	0.368911	-3.61427	-0.524333	-6.36355	-3.33218	-2.67897	-6.34214	-6.54673	-3.52738	-6.41301	-1.23635	-3.50485
ENSG00000223946	1.33688	0.000213732	RP11-533O20.2	lincRNA	-0.739421	-3.54881	0.650145	-4.7412	-1.13588	-2.33416	-1.27769	-4.04162	-2.4391	0.0337506	-4.02021	-2.63984	-2.08681	-2.95358	-2.5803	-6.31221
ENSG00000225037	0.925145	0.000284805	EIF1AX-AS1	antisense	-0.503353	-4.28577	0.221811	-0.771575	0.368911	-1.77777	0.0687569	-1.97123	-1.38465	0.259632	-1.13268	-1.26133	-0.0679473	-1.20356	0.539435	-1.78864
ENSG00000253270	1.46274	0.000295984	RP11-1105O14.1	lincRNA	-1.02182	-5.87074	-2.03058	-6.32616	-3.53798	-6.42162	-3.59962	-6.36355	-2.4391	-3.04154	-6.34214	-3.73937	-1.29034	-2.95358	-2.03282	-6.31221
ENSG00000231509	1.44875	0.000307351	RP11-574F11.3	lincRNA	-3.42392	-5.87074	-3.31068	-6.32616	-1.82177	-6.42162	-2.31951	-6.36355	-3.33218	-3.04154	-6.34214	-6.54673	-2.24727	-3.24309	-0.303464	-2.61177
ENSG00000259498	-1.31298	0.00034508	RP11-244F12.3	antisense	-6.23127	-3.06338	-6.11804	-2.07824	-6.34533	-4.09969	-6.40698	-4.04162	-6.13954	-5.84889	-2.6417	-6.54673	-6.33473	-2.71257	-6.28074	-2.06428
ENSG00000214145	1.77415	0.000364572	LINC00887	lincRNA	-0.122749	-3.54881	-0.187301	-4.7412	1.75795	-6.42162	-0.915123	-2.90412	-0.930083	-3.04154	-4.02021	-6.54673	0.204425	-0.580124	1.64407	-2.85278
ENSG00000231102	0.999842	0.000377593	RP11-298J23.5	antisense	-1.02182	-3.06338	0.389756	-2.62572	-0.322967	-2.17369	-0.340887	-4.04162	-2.05207	1.06997	-1.81858	-1.26133	-1.38054	-2.0207	-0.0519249	-1.10275
ENSG00000230322	0.998886	0.000393053	RP3-323N1.2	antisense	0.824009	-1.22688	1.50401	-1.46818	-0.368055	-2.0293	0.558808	-0.0967616	-0.256893	0.379926	-3.53478	-1.05488	-0.268645	-1.76916	0.0230371	-2.85278
ENSG00000237422	1.25918	0.000420412	RP11-305L7.3	lincRNA	-3.42392	-3.06338	-2.65861	-3.15624	-2.43844	-6.42162	-2.70654	-6.36355	-6.13954	-2.38946	-4.75718	-6.54673	-3.52738	-6.41301	-3.11082	-6.31221
ENSG00000269806	1.17939	0.000429608	CTD-3001H11.1	antisense	-3.42392	-5.87074	-3.31068	-3.51881	-2.43844	-6.42162	-2.94754	-6.36355	-6.13954	-3.04154	-6.34214	-6.54673	-2.8753	-4.09109	-3.11082	-3.50485
ENSG00000235237	1.4946	0.000462563	RP1-151B14.6	antisense	-2.77184	-5.87074	-1.87011	-2.41927	-2.43844	-6.42162	-2.01466	-6.36355	-3.33218	-5.84889	-6.34214	-6.54673	-2.08681	-6.41301	-1.23635	-6.31221
ENSG00000228481	0.873693	0.000489802	U51244.2	antisense	-0.676685	-3.06338	-1.47418	-2.86673	-2.25787	-3.2517	-0.476239	-3.19362	-2.4391	-1.942	-2.6417	-2.2988	-1.12528	-4.09109	-1.32655	-3.50485
ENSG00000258753	1.15102	0.000503482	RP11-794A8.1	lincRNA	-2.14381	-5.87074	-6.11804	-6.32616	-3.53798	-6.42162	-3.23705	-6.36355	-6.13954	-2.67897	-6.34214	-6.54673	-4.01281	-6.41301	-6.28074	-6.31221
ENSG00000270302	1.09322	0.000537297	RP11-461L13.4	lincRNA	-3.90935	-5.87074	-3.79611	-6.32616	-4.76037	-3.61427	-4.08505	-6.36355	-6.13954	-2.14845	-6.34214	-4.96177	-2.8753	-6.41301	-3.95882	-6.31221
ENSG00000227199	-1.15713	0.000549339	ST7-AS1	antisense	-0.208906	3.59074	-3.31068	1.75598	-0.23681	1.84047	1.7779	1.86045	2.25707	-0.990911	2.69404	1.64803	2.04464	2.96853	0.899165	2.43934
ENSG00000229619	-1.95917	0.000562332	MBNL1-AS1	antisense	-2.77184	1.66065	-3.31068	1.32489	-6.34533	2.1894	-3.59962	-3.55619	0.65488	-4.26393	1.95707	1.0899	-2.8753	1.25232	1.72488	1.17161
ENSG00000234361	1.27198	0.000570448	RP11-52J3.3	antisense	-0.449914	-3.54881	0.148748	-2.62572	-1.95302	-1.77777	0.581708	-1.50557	-2.6801	1.09362	-6.34214	-2.15441	-0.144909	-1.28373	-0.447854	-2.61177
ENSG00000249752	1.44856	0.000592972	RP11-563M4.1	lincRNA	2.24851	-5.87074	2.44802	-1.68231	1.36202	-3.61427	1.73768	-0.691123	-1.61597	-0.639439	-0.459495	0.441955	0.141	-0.073164	1.52016	-1.10275
ENSG00000233893	0.925077	0.000600761	EZR-AS1	antisense	1.02611	-2.1703	0.752326	-1.28177	0.709948	-1.77777	0.831428	-1.23427	0.336197	-0.234183	-2.6417	0.273449	-0.105915	-0.530371	0.513672	-2.61177
ENSG00000257194	1.29774	0.000608024	RP11-567C2.1	lincRNA	-3.42392	-5.87074	-6.11804	-6.32616	-1.82177	-6.42162	-2.50009	-6.36355	-6.13954	-5.84889	-6.34214	-6.54673	-2.42784	-4.09109	-1.88843	-6.31221
ENSG00000246308	0.88258	0.00063856	RP11-685M7.3	antisense	1.20335	-2.1703	1.28284	0.0136858	0.59718	-1.56364	1.01088	-2.11562	-0.411616	-0.804498	-0.509248	-0.48064	1.6019	0.186899	1.17047	-0.820354
ENSG00000272123	1.15723	0.000664206	CTD-2366F13.2	antisense	-3.42392	-5.87074	-1.72572	-6.32616	-6.34533	-6.42162	-3.59962	-6.36355	-6.13954	-3.04154	-6.34214	-6.54673	-3.52738	-6.41301	-6.28074	-6.31221
ENSG00000244265	0.96519	0.000664784	SIAH2-AS1	antisense	0.639091	-0.741452	2.09628	-0.493274	-0.116516	-0.867033	0.711965	-0.635628	-1.18534	-0.56349	-2.88271	-1.05488	1.18097	-0.631654	0.128647	-3.50485
ENSG00000231948	1.17317	0.000686801	HS1BP3-IT1	sense_intronic	-2.32438	-5.87074	-2.94811	-4.00424	-2.25787	-3.61427	-4.08505	-6.36355	-6.13954	-4.26393	-6.34214	-6.54673	-2.24727	-6.41301	-3.11082	-3.50485
ENSG00000241014	0.59187	0.000699727	RP11-244H3.1	processed_transcript	2.23225	0.897449	3.21064	1.9265	3.12431	2.45796	3.84923	2.31241	1.58156	3.06699	1.89148	1.94111	2.72326	2.37815	3.02987	1.139
ENSG00000269051	0.80085	0.000716584	CTD-2245F17.3	lincRNA	0.0355127	-1.34717	0.650145	-0.771575	0.854338	-2.51473	0.535538	-1.006	-0.930083	-0.719609	-1.21285	-2.45927	0.00511619	-0.30449	0.227051	-1.78864
ENSG00000270223	0.841321	0.000756718	RP13-36G14.4	sense_intronic	0.368639	-1.47842	0.824476	-1.46818	1.80948	-0.693701	1.02765	-2.45666	-1.28156	-0.0675327	-0.276048	-0.664087	0.698689	0.529501	1.15388	0.130737
ENSG00000250850	1.26298	0.000765444	RP11-297B17.3	antisense	-3.06135	-5.87074	-2.03058	-6.32616	-2.6449	-6.42162	-2.94754	-6.36355	-4.55457	-2.38946	-2.88271	-3.73937	-0.720024	-3.60566	-4.69578	-6.31221
ENSG00000260107	1.01812	0.000786587	AC005606.15	lincRNA	-4.64631	-5.87074	-2.94811	-6.32616	-3.17541	-6.42162	-3.59962	-6.36355	-4.55457	-5.84889	-6.34214	-4.96177	-3.16481	-4.82805	-3.11082	-6.31221
ENSG00000236383	0.722498	0.000800843	LINC00854	processed_transcript	4.01071	2.27392	3.66496	2.07898	4.14351	1.20043	4.61053	1.93566	2.23115	1.96489	1.98429	3.47425	3.16312	2.60658	3.70082	2.09293
ENSG00000267322	0.825513	0.000890845	SCARNA17	antisense	-6.23127	-5.87074	-4.53308	-6.32616	-4.76037	-6.42162	-4.82201	-6.36355	-6.13954	-3.52696	-6.34214	-6.54673	-4.01281	-6.41301	-4.69578	-6.31221
ENSG00000205056	1.76128	0.000892343	RP11-693J15.5	lincRNA	-0.208906	-5.87074	-2.03058	-6.32616	2.10175	-2.72118	-2.70654	-6.36355	-6.13954	-5.84889	-4.02021	-2.84629	-2.08681	-6.41301	0.564746	-3.50485
ENSG00000232719	1.04041	0.000896617	RP11-13J8.1	lincRNA	-1.27708	-2.4113	0.257001	-2.62572	-0.91907	-2.33416	-0.980712	-1.97123	-2.6801	-1.942	-6.34214	-2.84629	-1.81117	-3.24309	-0.608318	-3.50485
ENSG00000267136	1.11897	0.000930342	RP11-53B2.3	antisense	5.60911	-0.316146	5.36729	3.78888	4.0502	2.38895	5.1346	3.47723	4.18802	7.6168	2.69404	4.26143	4.1521	4.42383	4.87344	2.07581
ENSG00000234630	1.06494	0.000950629	LL22NC03-2H8.4	lincRNA	2.16533	-4.28577	2.69253	0.931224	1.54341	-0.538979	1.8362	-0.432811	0.43032	1.88582	1.14168	1.11861	2.55705	1.52362	2.64703	0.482209
ENSG00000204623	0.861985	0.000966331	ZNRD1-AS1	antisense	4.31851	1.20608	5.89563	3.04234	5.53693	1.22943	4.16383	3.03946	4.75149	3.64096	3.02637	3.8931	4.0151	3.36671	4.94868	3.13281
ENSG00000257534	1.15184	0.00101388	RP11-834C11.10	lincRNA	-4.64631	-5.87074	-2.4176	-4.7412	-3.17541	-4.83666	-3.23705	-3.55619	-6.13954	-3.04154	-6.34214	-4.96177	-1.38054	-2.95358	-1.42276	-6.31221
ENSG00000233334	0.796963	0.00105347	FAM53B-AS1	antisense	1.00713	0.319089	1.38181	-2.07824	0.193824	-0.806912	-0.298452	-0.530658	-0.647683	0.996598	-2.09421	-1.90287	0.510756	-0.390646	0.752679	-0.479317
ENSG00000225916	1.00599	0.00105768	AC007879.4	lincRNA	-3.42392	-5.87074	-3.79611	-6.32616	-3.53798	-6.42162	-3.59962	-6.36355	-3.33218	-5.84889	-6.34214	-6.54673	-4.01281	-6.41301	-3.95882	-6.31221
ENSG00000267521	1.34805	0.00107382	RP11-87G24.6	lincRNA	0.948635	-5.87074	0.257001	-0.834311	-0.987783	-1.37723	0.792696	-0.0236981	-2.4391	-0.719609	-2.09421	-1.41745	0.742082	-1.36862	2.86136	-3.99028
ENSG00000226320	1.06044	0.0010915	AC018359.1	lincRNA	-3.42392	-5.87074	-3.79611	-6.32616	-2.6449	-6.42162	-2.94754	-4.04162	-6.13954	-2.38946	-4.02021	-3.3768	-2.8753	-3.60566	-3.11082	-6.31221
ENSG00000237036	1.02346	0.00125766	ZEB1-AS1	processed_transcript	1.46221	-0.826341	2.58586	-2.41927	2.25086	-2.17369	1.71714	-0.808959	1.42271	1.27005	0.55268	2.03447	1.16511	0.705927	1.29669	-1.18292
ENSG00000228596	0.934402	0.00126482	AC013436.6	antisense	-3.90935	-5.87074	-3.79611	-6.32616	-3.53798	-6.42162	-3.23705	-4.77859	-6.13954	-5.84889	-6.34214	-6.54673	-4.01281	-4.09109	-3.47339	-6.31221
ENSG00000257221	1.13088	0.0013094	RP11-689B22.2	antisense	-0.348631	-0.741452	-2.21115	-3.51881	0.773606	-3.2517	1.2725	-2.90412	-1.09514	-1.76143	-2.88271	-1.68875	0.294623	-1.36862	1.81201	-2.40532
ENSG00000224973	1.05704	0.00131604	LARGE-AS1	processed_transcript	-0.616564	-5.87074	-0.832637	-2.2387	-1.30094	-2.72118	-0.103196	-3.55619	-2.05207	-0.234183	-4.02021	-2.63984	-1.29034	-0.986749	-0.447854	-1.10275
ENSG00000260482	1.19465	0.00134638	CTD-2196E14.9	lincRNA	-1.58742	-1.47842	1.72116	-1.37197	1.78909	-0.867033	0.307269	-0.937283	-2.05207	3.32354	-1.13268	-0.71384	2.55705	1.82061	1.66762	-2.61177
ENSG00000229105	1.00408	0.0013857	RP11-264C15.2	antisense	-3.42392	-5.87074	-3.31068	-6.32616	-3.17541	-6.42162	-4.08505	-6.36355	-4.55457	-5.84889	-6.34214	-6.54673	-2.8753	-6.41301	-6.28074	-6.31221
ENSG00000233393	1.49139	0.0014205	AP000688.29	lincRNA	-1.70771	-5.87074	-1.26006	-6.32616	-2.8859	-3.61427	-3.59962	-6.36355	-6.13954	-5.84889	-3.53478	-6.54673	-0.553374	-2.71257	-0.0139571	-6.31221
ENSG00000255518	0.975012	0.00143764	RP11-148O21.4	antisense	2.62359	-1.62281	2.69894	0.873508	4.17332	0.633661	2.21141	0.776003	3.61702	3.64496	1.40606	2.92291	3.11028	2.34521	4.58422	1.46258
ENSG00000235908	0.751317	0.00154396	RHOA-IT1	sense_intronic	2.91083	-0.741452	3.39174	1.79796	1.84942	0.23659	2.48481	0.481942	2.7823	1.29066	0.857535	1.0899	2.07041	0.881607	2.62915	0.806734
ENSG00000263657	0.712696	0.00156052	RP11-82O19.1	antisense	-0.805009	-1.47842	-0.00951437	-2.62572	-0.853482	-2.96219	-0.852388	-2.66311	-1.38465	-0.719609	-2.43525	-1.12046	-0.662308	-2.50612	-1.23635	-1.91989
ENSG00000255354	0.975901	0.00156531	RP11-148O21.2	antisense	4.08953	-0.661282	3.88899	2.45191	5.71772	2.77067	3.74658	1.64208	4.89732	4.69511	2.85508	3.98368	4.66174	4.02057	6.07047	2.98929
ENSG00000232490	1.11701	0.00157809	OSBPL10-AS1	antisense	0.563142	-1.62281	-0.095671	-2.2387	1.21691	-2.96219	-1.76312	-2.27609	-1.38465	-0.804498	-1.94982	-0.279943	0.978149	-0.223189	2.7444	-3.14228
ENSG00000256988	1.1112	0.00159565	RP11-234B24.4	lincRNA	-1.27708	-5.87074	-2.03058	-6.32616	-3.53798	-6.42162	-4.82201	-6.36355	-6.13954	-5.84889	-6.34214	-6.54673	-4.74977	-6.41301	-6.28074	-6.31221
ENSG00000254269	1.31593	0.00164031	CTD-2281E23.2	processed_transcript	-2.32438	-2.70081	-1.47418	-6.32616	-4.02341	-6.42162	-2.94754	-6.36355	-6.13954	-2.38946	-6.34214	-2.63984	-1.04933	-2.16509	-2.82131	-6.31221
ENSG00000224713	1.22515	0.00165868	AC025165.8	antisense	-1.02182	-5.87074	-2.4176	-3.51881	-1.39114	-4.09969	-2.94754	-6.36355	-3.81761	-3.04154	-4.75718	-2.63984	-3.52738	-6.41301	0.319169	-2.06428
ENSG00000256139	1.24598	0.00172243	RP11-968O1.5	sense_overlapping	-1.02182	-5.87074	0.451817	-0.711454	-1.39114	-4.09969	-1.65209	-4.04162	-3.33218	0.0818449	-4.02021	-3.0873	-3.52738	-6.41301	-2.82131	-3.50485
ENSG00000232354	0.906525	0.00176489	VIPR1-AS1	antisense	0.987895	-2.70081	0.893188	-1.19688	0.254578	-3.61427	0.669839	-0.691123	-0.117168	-0.294304	-1.58725	-0.396982	0.141	0.705927	0.730484	-2.06428
ENSG00000175061	-0.638401	0.00177014	FAM211A-AS1	processed_transcript	7.72519	10.8187	8.48692	8.65286	7.54388	8.13267	8.41922	9.06824	8.84199	6.66558	8.65843	8.22192	6.79503	8.33973	6.75869	8.17016
ENSG00000233953	1.15626	0.00177144	AC009970.1	antisense	1.41978	-5.87074	1.10113	-0.443521	0.500155	-0.806912	1.55303	-1.15409	-3.33218	-0.804498	-1.13268	-0.56945	0.941391	0.301232	0.938425	-0.954655
ENSG00000254223	-1.24323	0.00177509	RP11-419K12.1	lincRNA	-6.23127	-1.22688	-1.47418	-2.2387	-6.34533	-2.72118	-2.94754	-3.55619	-1.38465	-5.84889	-2.6417	-2.15441	-6.33473	-1.36862	-3.47339	-2.06428
ENSG00000236708	1.02635	0.00179813	AC073316.1	antisense	-3.42392	-5.87074	-3.31068	-6.32616	-6.34533	-6.42162	-6.40698	-6.36355	-6.13954	-2.67897	-6.34214	-4.96177	-2.63429	-6.41301	-3.95882	-6.31221
ENSG00000248265	1.14554	0.00190963	RP11-834C11.3	lincRNA	-6.23127	-5.87074	-3.31068	-6.32616	-2.09741	-6.42162	-2.70654	-3.55619	-6.13954	-5.84889	-6.34214	-6.54673	-2.08681	-6.41301	-3.47339	-6.31221
ENSG00000262006	1.29015	0.00194619	RP11-700H6.4	lincRNA	-3.42392	-5.87074	0.357695	-2.62572	-3.17541	-2.72118	-1.549	-4.04162	-3.33218	-0.294304	-6.34214	-3.3768	-1.94242	-2.16509	-0.608318	-6.31221
ENSG00000269553	1.02514	0.0020097	U62631.5	sense_intronic	1.79663	-1.22688	0.451817	-1.93385	3.5204	0.567063	2.64559	-0.937283	-0.306646	0.945523	-0.850285	2.25093	2.13694	2.1757	3.30234	1.12242
ENSG00000268947	0.661465	0.00204797	AD000684.2	sense_intronic	0.307885	-2.70081	1.12037	-0.21764	0.912053	-0.749196	0.831428	-0.34118	-0.117168	0.379926	-0.850285	-0.71384	0.653951	-0.00362305	0.817288	0.195588
ENSG00000249592	0.62991	0.00207026	RP11-440L14.1	antisense	2.37975	0.106545	2.43271	0.0136858	2.58836	0.292624	2.90817	0.98518	1.97421	1.71335	1.29449	1.94111	2.00956	1.0708	2.23101	2.20743
ENSG00000230438	0.802223	0.00222665	RP11-420G6.4	lincRNA	3.22611	2.80522	2.67962	1.10846	4.26845	3.67773	2.21873	0.713267	1.55395	4.66385	1.07571	3.46589	3.4417	1.34854	4.64184	2.17563
ENSG00000228386	0.756734	0.00226244	RP5-1125A11.4	lincRNA	-0.616564	-3.54881	-1.16384	-1.93385	-1.70148	-3.61427	-1.19752	-2.90412	-1.28156	-2.38946	-3.53478	-2.84629	-0.977182	-2.71257	-1.07129	-2.61177
ENSG00000224031	1.13599	0.00227933	TCEAL3-AS1	antisense	-2.53083	-5.87074	-1.16384	-6.32616	-3.17541	-6.42162	-6.40698	-6.36355	-6.13954	-5.84889	-6.34214	-4.2248	-2.8753	-6.41301	-4.69578	-6.31221
ENSG00000170983	1.12057	0.00238126	LINC00208	lincRNA	-3.42392	-5.87074	-2.4176	-6.32616	-1.82177	-6.42162	-4.08505	-6.36355	-6.13954	-5.84889	-4.02021	-6.54673	-6.33473	-6.41301	-2.5803	-6.31221
ENSG00000233862	1.16814	0.00239111	AC016907.3	antisense	0.21167	-2.1703	0.893188	-1.11671	-1.95302	-2.72118	1.30038	-0.213801	-0.306646	-0.422628	-6.34214	-1.68875	-0.0309531	-1.76916	1.31171	-2.61177
ENSG00000261996	1.27036	0.00243537	CTC-281F24.1	antisense	0.24446	-5.87074	-0.691774	-1.46818	-0.853482	-3.61427	-0.625617	-3.19362	-2.6801	-3.52696	-4.75718	-1.41745	-0.842881	-1.12761	-0.130996	-6.31221
ENSG00000260884	0.763275	0.00245533	AC009120.5	lincRNA	0.338582	-3.06338	0.958777	-0.834311	1.5913	-0.154835	1.36781	-1.006	0.0892826	0.626841	0.227718	0.323635	0.978149	0.705927	2.01846	0.163527
ENSG00000260792	1.3109	0.00245911	RP11-982M15.8	lincRNA	-3.42392	-5.87074	1.28284	-6.32616	-1.05993	-3.61427	-0.257229	-3.55619	-2.4391	-2.14845	-3.53478	-1.79184	-2.63429	-3.60566	-2.82131	-6.31221
ENSG00000258695	1.34272	0.00248052	RP3-414A15.2	antisense	-1.10199	-5.87074	-0.908585	-1.57128	-0.91907	-6.42162	-0.14019	-2.45666	-1.38465	-2.38946	-6.34214	-2.2988	-1.29034	-1.20356	-1.42276	-6.31221
ENSG00000232377	1.10421	0.00249194	AC016910.1	antisense	-2.53083	-5.87074	-1.47418	-2.62572	-3.53798	-4.83666	-2.15905	-6.36355	-2.6801	-3.52696	-6.34214	-6.54673	-2.42784	-3.60566	-1.88843	-3.50485
ENSG00000262884	0.9204	0.00251938	CTD-3060P21.1	antisense	-0.503353	-1.34717	0.70214	-1.04076	0.396132	-1.21217	2.27602	-1.97123	-0.584947	0.300855	-3.53478	-2.2988	-1.29034	-0.530371	-0.447854	-2.06428
ENSG00000258760	1.46883	0.00252369	CTD-2509G16.5	lincRNA	-3.42392	-5.87074	-2.94811	-6.32616	1.15451	-6.42162	-4.08505	-4.04162	-6.13954	-5.84889	-6.34214	-6.54673	-6.33473	-6.41301	-0.172219	-6.31221
ENSG00000236760	1.2303	0.0025773	AC019118.3	lincRNA	0.663544	-1.47842	-1.36315	-3.51881	0.284022	-1.77777	-2.15905	-4.04162	-2.4391	-0.357039	-1.58725	-0.438205	0.379512	-2.0207	3.88039	-2.85278
ENSG00000261572	-2.0061	0.00259424	RP11-384L8.1	sense_intronic	-6.23127	0.469115	-6.11804	-1.8026	-6.34533	0.346563	0.132182	-0.871695	-6.13954	-5.84889	0.344363	-6.54673	-6.33473	0.806155	-6.28074	-0.16246
ENSG00000261188	-1.90606	0.00259677	CTA-445C9.14	antisense	-6.23127	0.572208	-6.11804	-1.8026	-0.195588	-6.42162	-1.88341	0.836124	-0.411616	-5.84889	0.0672532	0.023126	-6.33473	-1.05546	-6.28074	0.606656
ENSG00000232211	1.2092	0.00264494	RP11-395D3.1	lincRNA	-6.23127	-5.87074	-4.53308	-6.32616	-3.53798	-6.42162	-1.04942	-3.55619	-6.13954	-5.84889	-6.34214	-6.54673	-2.42784	-6.41301	-1.23635	-6.31221
ENSG00000260536	0.928426	0.00274659	RP5-1085F17.4	antisense	0.178117	-5.87074	0.0317083	-1.8026	-0.790746	-2.72118	-0.257229	-1.83999	-1.18534	-0.719609	-1.94982	-1.90287	-1.20545	-1.05546	0.227051	-1.66835
ENSG00000223749	-1.42365	0.00274906	MIR503HG	lincRNA	-2.77184	-1.11585	-3.31068	-1.37197	-6.34533	-0.490884	-6.40698	0.112185	-1.89161	-3.04154	1.09249	-0.48064	1.62527	1.14923	-1.63689	-0.0833882
ENSG00000267393	1.34845	0.00277592	RP11-691H4.3	antisense	-2.77184	-5.87074	-1.47418	-6.32616	-6.34533	-4.09969	-3.59962	-6.36355	-6.13954	0.340932	-6.34214	-6.54673	-3.16481	-6.41301	-3.47339	-2.85278
ENSG00000234684	0.853537	0.00286181	SDCBP2-AS1	antisense	4.54104	-1.11585	3.07425	2.50356	3.48914	3.02753	4.09784	2.97407	3.19809	4.0774	3.67328	2.93507	5.15762	2.61765	5.49939	3.18165
ENSG00000263214	1.17946	0.00287051	ZNF205-AS1	antisense	-0.300536	-1.11585	1.41334	-0.303796	0.130399	-6.42162	1.07684	-1.07815	-3.33218	-1.45657	-1.81858	-0.317911	0.0746571	-0.921161	0.730484	-3.50485
ENSG00000272502	-1.0858	0.00300887	RP11-713M15.2	antisense	-6.23127	-2.70081	-6.11804	-6.32616	-6.34533	-2.17369	-6.40698	-6.36355	-3.33218	-5.84889	-3.17221	-6.54673	-6.33473	-3.60566	-6.28074	-2.61177
ENSG00000267904	0.686219	0.00302018	CTC-429P9.5	sense_intronic	1.92354	-1.47842	1.74615	2.00923	2.22831	1.41758	3.32604	0.602236	0.826248	1.97766	1.54661	1.00016	2.41681	1.83016	2.76092	0.806734
ENSG00000262903	0.790551	0.00303564	RP11-235E17.6	antisense	1.43406	1.02408	2.84486	-0.0593776	1.02099	-0.192803	1.22965	0.294663	-1.61597	3.13695	-0.113319	0.247686	-0.226209	-0.986749	0.938425	0.0971841
ENSG00000260816	1.00445	0.00309494	RP11-319G9.3	sense_intronic	-3.42392	-5.87074	-3.31068	-6.32616	-2.6449	-3.61427	-6.40698	-6.36355	-6.13954	-5.84889	-6.34214	-6.54673	-2.63429	-6.41301	-3.47339	-6.31221
ENSG00000233221	0.998603	0.00311221	AC133785.1	antisense	-3.42392	-5.87074	-6.11804	-6.32616	-6.34533	-6.42162	-3.59962	-6.36355	-6.13954	-3.04154	-6.34214	-6.54673	-2.24727	-6.41301	-3.47339	-3.99028
ENSG00000272219	1.31172	0.00312134	CTB-181H17.1	sense_intronic	-2.77184	-3.06338	-1.07364	-6.32616	-6.34533	-2.72118	-2.15905	-6.36355	-6.13954	-1.942	-6.34214	-6.54673	-2.63429	-6.41301	-3.47339	-6.31221
ENSG00000231393	0.770702	0.00313283	RP11-331F9.3	antisense	1.44821	-2.1703	2.33729	-0.395427	1.23209	-0.117841	0.626446	-0.691123	0.65488	-0.719609	-0.850285	0.887899	1.46617	0.216343	1.71361	-0.639782
ENSG00000242618	1.47927	0.00319115	RP11-433A10.2	lincRNA	-0.503353	-2.70081	-2.4176	-6.32616	-0.322967	-6.42162	-1.88341	-3.55619	-6.13954	-5.84889	-6.34214	-3.3768	-2.42784	-1.55503	0.614074	-6.31221
ENSG00000234203	1.04185	0.00323024	RP5-1050D4.2	antisense	-1.83896	-5.87074	-3.31068	-3.51881	-2.43844	-2.96219	-3.59962	-6.36355	-6.13954	-1.32533	-2.6417	-4.2248	-2.63429	-6.41301	-3.47339	-4.72724
ENSG00000253640	1.18801	0.00334888	CTD-2281E23.1	lincRNA	1.00713	0.106545	0.776779	-3.51881	-2.25787	-6.42162	-0.0671265	-2.11562	-3.81761	-0.719609	-2.6417	-1.68875	0.63105	0.301232	-0.854479	-3.50485
ENSG00000259293	1.35645	0.00343318	RP11-355N15.1	antisense	-1.83896	-2.4113	-0.285149	-6.32616	-1.59045	-6.42162	-2.94754	-6.36355	-6.13954	-5.84889	-2.6417	-6.54673	-2.08681	-6.41301	-2.82131	-3.99028
ENSG00000254035	1.02257	0.00346243	RP11-281O15.4	antisense	-3.42392	-5.87074	-6.11804	-6.32616	-2.8859	-6.42162	-2.94754	-6.36355	-2.96961	-3.04154	-4.75718	-6.54673	-2.63429	-4.09109	-3.47339	-6.31221
ENSG00000260368	-1.63513	0.00346873	RP11-521I2.3	sense_overlapping	-6.23127	-5.87074	-6.11804	-0.544804	-6.34533	-1.21217	-6.40698	-1.83999	-6.13954	-5.84889	-6.34214	-6.54673	-6.33473	0.726537	-6.28074	-0.0454203
ENSG00000263826	3.38441	0.00347851	RP11-573D15.9	antisense	4.47522	-5.87074	4.57632	5.73689	5.25318	-6.42162	4.73832	-6.36355	-6.13954	-5.84889	-6.34214	-6.54673	5.31856	-6.41301	-6.28074	-6.31221
ENSG00000243491	1.24526	0.0034979	RP11-521D12.5	lincRNA	-1.70771	-3.06338	-0.908585	-6.32616	1.18605	-3.61427	-0.476239	-2.66311	-2.4391	-1.094	-3.53478	-0.317911	-3.52738	-3.60566	-1.42276	-6.31221
ENSG00000272335	-1.44832	0.00357915	RP11-53O19.3	lincRNA	-1.10199	-0.378882	-2.03058	-1.46818	-6.34533	0.758288	-6.40698	-1.07815	0.303407	-5.84889	0.91525	-2.63984	-0.662308	-1.55503	-1.42276	0.346005
ENSG00000255733	1.23466	0.00359775	IFNG-AS1	antisense	-2.53083	-5.87074	-1.87011	-3.51881	-0.790746	-4.09969	-0.524333	-2.66311	-3.81761	1.33102	-2.43525	0.221455	-2.63429	-2.95358	-0.499384	-6.31221
ENSG00000232485	1.0018	0.0036318	AC098820.3	processed_transcript	-2.53083	-3.06338	-1.72572	-3.51881	-1.21605	-4.83666	-1.45278	-3.55619	-2.96961	-3.04154	-6.34214	-1.79184	-1.94242	-2.71257	-1.88843	-6.31221
ENSG00000257083	0.951921	0.00364291	RP11-123O10.3	lincRNA	-2.53083	-5.87074	-4.53308	-3.51881	-3.17541	-4.83666	-3.59962	-6.36355	-6.13954	-5.84889	-6.34214	-6.54673	-2.24727	-4.82805	-3.95882	-6.31221
ENSG00000247595	0.650912	0.00369631	SPTY2D1-AS1	processed_transcript	0.908278	-1.47842	0.257001	1.10846	1.13848	-0.0817716	1.31412	0.144247	-0.713271	0.454888	-0.509248	-0.664087	0.864939	0.245197	2.23101	-0.697497
ENSG00000260493	1.06573	0.00370436	RP11-219B4.7	antisense	-2.32438	-3.06338	-2.65861	-6.32616	-3.53798	-3.61427	-6.40698	-6.36355	-6.13954	-3.04154	-6.34214	-6.54673	-3.52738	-6.41301	-3.11082	-6.31221
ENSG00000267690	1.0752	0.00370534	LDLRAD4-AS1	antisense	0.24446	-5.87074	0.540173	-2.41927	-1.30094	-1.37723	-0.384609	-2.66311	-0.467111	2.58156	-1.29774	-1.26133	-0.908469	-0.740589	0.0591064	-2.40532
ENSG00000224959	-1.16303	0.00389622	AC017002.2	lincRNA	-3.90935	-3.54881	-3.31068	-1.46818	-6.34533	-0.693701	-6.40698	-1.31915	-1.89161	-5.84889	-2.25467	-4.2248	-1.29034	-1.45882	-3.95882	-2.61177
ENSG00000263011	0.946836	0.00392507	RP11-473M20.11	sense_overlapping	-2.14381	-3.06338	-1.36315	-2.41927	-1.95302	-4.83666	-1.12157	-4.77859	-6.13954	-4.26393	-3.53478	-3.0873	-1.47675	-2.95358	-2.03282	-4.72724
ENSG00000255669	0.94167	0.00396423	RP11-885B4.2	lincRNA	-1.47639	-4.28577	-0.908585	-2.2387	-1.21605	-6.42162	-1.45278	-3.19362	-2.96961	-3.52696	-4.02021	-1.79184	-1.29034	-2.71257	-1.07129	-2.85278
ENSG00000224137	1.34136	0.00397384	AC079767.4	lincRNA	-1.37329	-5.87074	-6.11804	-6.32616	-0.041554	-6.42162	-3.59962	-6.36355	-2.96961	-2.14845	-6.34214	-2.84629	-4.01281	-3.60566	-1.32655	-6.31221
ENSG00000268257	-1.08333	0.00400424	AIRN	antisense	-6.23127	-5.87074	-6.11804	-2.62572	-6.34533	-2.17369	-6.40698	-3.55619	-2.4391	-5.84889	-3.53478	-2.2988	-3.52738	-6.41301	-6.28074	-3.50485
ENSG00000248210	1.03391	0.0040157	RP11-24I21.1	lincRNA	2.78275	-1.11585	3.38777	-0.443521	2.6798	-1.37723	1.98963	0.481942	0.518675	-1.094	-0.31977	2.90242	2.26146	1.33518	3.63065	0.0971841
ENSG00000231654	0.980965	0.00404274	RPS6KA2-AS1	antisense	-1.58742	-5.87074	-1.72572	-2.62572	-0.23681	-2.96219	-0.429697	-0.635628	-1.28156	-0.804498	-3.53478	-1.68875	-1.38054	-2.16509	-0.258376	-4.72724
ENSG00000267546	0.677179	0.00419079	RP11-666A8.8	antisense	0.510193	-1.01275	0.650145	-0.771575	0.64335	-0.693701	-0.852388	-2.66311	0.269855	0.594051	-2.09421	-0.874304	-0.357454	-0.482277	0.348613	-1.66835
ENSG00000246763	1.47799	0.00420273	RGMB-AS1	antisense	-0.616564	-3.54881	-6.11804	-3.51881	-0.91907	-2.33416	-1.88341	-2.27609	-3.33218	1.16233	-4.75718	-6.54673	0.884435	-3.60566	0.289112	-6.31221
ENSG00000253854	0.968324	0.00429321	RP11-10N23.2	antisense	-0.398384	-5.87074	-0.760487	-1.8026	0.42285	-3.61427	1.28651	-1.07815	-1.01025	-0.49134	-1.94982	-0.438205	-0.908469	-1.65813	-0.666034	-1.66835
ENSG00000231613	0.888399	0.00433685	RP5-943J3.1	sense_intronic	-1.83896	-5.87074	-2.4176	-2.2387	-2.43844	-3.61427	-2.31951	-3.55619	-4.55457	-3.04154	-2.6417	-4.96177	-0.720024	-2.71257	-1.75718	-4.72724
ENSG00000254177	0.704011	0.0045632	RP11-1149M10.1	lincRNA	0.687589	-3.06338	1.24828	-0.260075	0.284022	0.398557	-0.217152	-1.006	0.0102111	1.53481	-0.787549	0.395785	1.19665	-0.685094	1.10296	-0.246118
ENSG00000240710	0.915538	0.0045687	RP11-430C7.4	antisense	1.28443	-3.06338	1.21288	1.87841	2.60011	-2.17369	1.36781	0.236365	0.546964	2.94227	0.896267	1.90035	1.49181	0.407165	1.87407	-0.639782
ENSG00000225431	0.979279	0.00463753	AP001626.1	lincRNA	-3.42392	-5.87074	-3.31068	-6.32616	-3.53798	-6.42162	-6.40698	-6.36355	-6.13954	-2.14845	-6.34214	-3.73937	-3.52738	-6.41301	-6.28074	-6.31221
ENSG00000229986	1.26254	0.00468601	AP001042.1	lincRNA	-2.32438	-5.87074	-1.59448	-6.32616	-3.53798	-0.749196	-1.65209	-6.36355	-2.96961	-0.49134	-6.34214	-6.54673	-2.63429	-3.60566	-2.82131	-3.50485
ENSG00000269535	0.722116	0.00477767	CTD-2525I3.6	antisense	0.108576	-4.28577	-0.095671	-0.968612	0.16246	-0.693701	0.732575	-1.07815	-0.781984	0.0818449	-0.0383569	-1.26133	0.265179	-0.685094	0.589621	-0.954655
ENSG00000258480	1.13173	0.00481905	RP11-662J14.2	lincRNA	-1.70771	-5.87074	-4.53308	-6.32616	-2.09741	-6.42162	-1.88341	-6.36355	-6.13954	-4.26393	-6.34214	-2.84629	-3.52738	-2.16509	-2.5803	-3.99028
ENSG00000230068	0.685654	0.00486853	CDC42-IT1	sense_intronic	1.04485	-0.444471	0.824476	0.18163	-0.0785482	-0.693701	-0.14019	-2.90412	0.235503	-0.294304	-1.38794	-0.615992	0.978149	-0.390646	1.48081	-1.10275
ENSG00000239482	0.877564	0.00489089	RP11-90K6.1	lincRNA	-3.42392	-5.87074	-2.65861	-4.7412	-2.25787	-3.61427	-3.59962	-3.55619	-3.81761	-3.04154	-3.53478	-4.2248	-1.38054	-2.95358	-1.52586	-6.31221
ENSG00000227392	1.24485	0.00489997	HPN-AS1	antisense	-2.14381	-2.1703	-2.4176	-2.2387	-4.02341	-6.42162	0.0024144	-3.55619	-6.13954	0.0818449	-6.34214	-2.15441	-2.24727	-6.41301	-2.03282	-3.50485
ENSG00000226877	0.911804	0.00494595	RP11-575L7.2	antisense	-3.90935	-5.87074	-2.94811	-6.32616	-3.53798	-6.42162	-2.94754	-6.36355	-3.81761	-5.84889	-4.02021	-6.54673	-4.74977	-6.41301	-3.95882	-6.31221
ENSG00000267535	1.21064	0.00503596	LINC00868	lincRNA	-2.32438	-5.87074	-1.87011	-3.15624	-1.82177	-6.42162	-3.59962	-6.36355	-2.4391	-5.84889	-6.34214	-6.54673	-1.20545	-2.50612	-2.37385	-6.31221
ENSG00000259577	1.2011	0.00504607	RP11-430B1.2	lincRNA	1.54351	0.758621	2.10596	0.912241	0.16246	-2.51473	0.691056	-6.36355	1.42271	0.720963	-0.233613	-1.26133	0.00511619	-3.60566	1.41274	-1.45423
ENSG00000250252	1.17139	0.00509698	RP11-342A1.1	lincRNA	-2.77184	-5.87074	-0.908585	-6.32616	-2.25787	-6.42162	-3.23705	-3.19362	-1.89161	-3.52696	-6.34214	-2.02317	-3.16481	-4.09109	-1.63689	-6.31221
ENSG00000272377	1.15185	0.00510452	RP11-682N22.1	lincRNA	-4.64631	-3.06338	-3.79611	-4.00424	-0.987783	-6.42162	-1.27769	-2.90412	-2.96961	-1.76143	-6.34214	-4.2248	-3.16481	-6.41301	-1.75718	-6.31221
ENSG00000271755	-1.40572	0.00534103	RP1-153G14.4	lincRNA	-6.23127	-1.34717	-6.11804	-2.07824	-6.34533	-6.42162	-6.40698	-6.36355	-0.524826	-1.32533	-1.81858	-2.84629	-6.33473	-1.65813	-6.28074	-1.18292
ENSG00000253522	0.849846	0.00534791	MIR146A	lincRNA	-0.676685	-1.22688	-1.47418	-1.19688	0.312877	-3.2517	0.959346	-4.04162	-2.96961	-1.60096	-2.09421	-2.63984	-0.908469	-2.50612	-2.19328	-2.40532
ENSG00000230266	0.898641	0.00537558	XXYLT1-AS2	antisense	-0.0414492	-1.01275	0.568462	-2.62572	-2.43844	-4.09969	-1.19752	-3.55619	-2.4391	-0.294304	-3.53478	-3.3768	-2.08681	-4.09109	-3.11082	-2.61177
ENSG00000256072	0.98909	0.00543817	RP11-335I12.2	antisense	-2.32438	-5.87074	-2.03058	-4.00424	-1.70148	-2.17369	-2.31951	-2.45666	-4.55457	-1.76143	-6.34214	-3.3768	-2.63429	-6.41301	-3.95882	-3.99028
ENSG00000250057	0.874161	0.0054443	RP11-576N17.5	lincRNA	-2.53083	-3.54881	-0.988756	-2.07824	-1.82177	-6.42162	-2.50009	-4.04162	-2.96961	-2.67897	-4.75718	-3.0873	-3.52738	-4.09109	-1.75718	-4.72724
ENSG00000254094	0.934442	0.0054782	AC078852.1	sense_intronic	-3.42392	-5.87074	-3.31068	-6.32616	-1.39114	-4.83666	-2.94754	-6.36355	-3.33218	-3.52696	-4.02021	-2.63984	-2.63429	-2.95358	-2.19328	-4.72724
ENSG00000267529	0.742655	0.00549837	RP11-53B2.1	antisense	0.73451	-3.06338	0.511318	0.0488753	-0.462692	-1.66673	0.192936	-0.808959	-0.208799	2.43188	-0.727428	0.0826271	0.00511619	-0.798304	0.19499	-1.66835
ENSG00000224505	0.729664	0.0055033	AC002117.1	antisense	-0.122749	-3.54881	0.42112	-1.11671	-0.195588	-2.33416	-0.574087	-2.45666	-2.23265	-2.14845	-2.43525	-1.90287	-2.24727	-2.0207	-0.854479	-2.40532
ENSG00000223561	1.80437	0.00552166	AC003090.1	lincRNA	0.178117	-5.87074	2.99831	-3.51881	1.36202	-6.42162	1.99816	-1.23427	0.303407	-5.84889	-6.34214	-0.615992	-1.69088	-6.41301	-1.15146	-3.50485
ENSG00000231154	0.74027	0.00561366	MORF4L2-AS1	antisense	1.76308	-2.4113	2.96145	1.31046	2.13445	-0.806912	1.86449	0.89384	1.46779	0.837608	0.817734	1.72473	2.49499	1.30809	2.13288	0.806734
ENSG00000267747	0.801799	0.00566567	RP11-392O1.4	antisense	-3.42392	-5.87074	-4.53308	-3.51881	-3.17541	-4.83666	-3.23705	-6.36355	-4.55457	-4.26393	-6.34214	-4.96177	-2.63429	-4.82805	-4.69578	-6.31221
ENSG00000267246	0.702363	0.00573735	RP11-798G7.7	processed_transcript	1.40535	-2.4113	1.24828	0.592699	1.41622	-0.929768	0.413202	-1.40935	-0.584947	0.379926	-0.152313	1.01551	0.00511619	-0.073164	0.513672	-1.66835
ENSG00000249825	0.767116	0.00584778	CTD-2201I18.1	antisense	2.39444	-0.19831	3.63852	2.16969	2.59424	-0.640262	2.62369	2.20251	2.29092	1.37028	0.372108	3.07715	3.83143	2.01744	2.54262	-0.203682
ENSG00000273192	-2.20739	0.00593425	CITF22-1A6.3	lincRNA	-6.23127	1.64496	-6.11804	-6.32616	-6.34533	-6.42162	-6.40698	1.22891	2.28253	-5.84889	2.66068	-6.54673	-6.33473	1.85845	-6.28074	-6.31221
ENSG00000225032	0.666089	0.00594789	RP11-228B15.4	antisense	6.75368	3.98257	6.46622	4.94588	4.12939	3.1272	7.50245	4.78937	4.87099	5.8786	5.27579	6.57399	6.64273	5.78451	6.56729	5.3518
ENSG00000250027	0.827451	0.00595389	RP11-563E2.2	antisense	-1.58742	-5.87074	-0.832637	-1.68231	-0.414597	-1.21217	-0.524333	-3.55619	-1.38465	-1.45657	-2.88271	-3.0873	-1.69088	-2.71257	-1.32655	-2.40532
ENSG00000212939	0.962431	0.00596113	RP1-29C18.10	antisense	0.307885	-5.87074	-0.445613	-2.07824	0.130399	-1.77777	0.869148	-1.83999	-0.411616	-2.14845	-1.21285	-2.15441	0.485445	-0.109233	0.487441	-2.06428
ENSG00000251141	1.08203	0.00601616	RP11-53O19.1	antisense	-3.42392	-2.4113	-1.47418	-6.32616	-3.53798	-6.42162	-2.70654	-6.36355	-6.13954	-3.52696	-6.34214	-3.73937	-3.16481	-2.32555	-3.11082	-6.31221
ENSG00000233926	1.20186	0.00602408	RP11-154D17.1	lincRNA	-1.98335	-5.87074	0.540173	-2.2387	-1.13588	-6.42162	0.132182	-1.71969	-1.01025	-1.45657	-3.17221	-0.992141	-2.8753	-2.95358	-0.923192	-6.31221
ENSG00000237738	0.68458	0.00604444	RNF216-IT1	sense_intronic	-2.32438	-4.28577	-2.21115	-4.00424	-2.43844	-3.2517	-3.59962	-4.77859	-2.6801	-1.20504	-3.53478	-3.3768	-1.94242	-4.09109	-2.5803	-3.14228
ENSG00000224281	1.53919	0.00605629	SLC25A5-AS1	processed_transcript	0.987895	-5.87074	2.2871	1.66819	1.15451	0.891261	1.21508	0.0793954	-6.13954	1.99031	-1.05674	1.47008	1.96447	1.86776	2.30046	-6.31221
ENSG00000237280	0.790831	0.00607227	RP11-96C23.9	sense_intronic	-1.83896	-5.87074	-2.03058	-3.51881	-2.8859	-4.09969	-1.65209	-2.45666	-2.4391	-1.45657	-4.75718	-2.45927	-2.63429	-3.60566	-1.88843	-3.14228
ENSG00000261243	1.02701	0.00610704	RP11-517C16.4	antisense	-3.42392	-5.87074	-1.87011	-3.15624	-2.6449	-6.42162	-3.59962	-6.36355	-6.13954	-3.52696	-2.09421	-6.54673	-3.52738	-6.41301	-2.82131	-3.50485
ENSG00000253593	-0.993241	0.00615835	RP11-157E21.1	lincRNA	-3.90935	-2.1703	-6.11804	-6.32616	-6.34533	-2.0293	-6.40698	-2.90412	-2.6801	-5.84889	-6.34214	-4.2248	-6.33473	-4.82805	-6.28074	-3.50485
ENSG00000255503	1.00467	0.00616786	RP11-113K21.4	lincRNA	-3.42392	-5.87074	-2.21115	-4.00424	-2.8859	-3.2517	-2.94754	-2.90412	-6.13954	-5.84889	-6.34214	-6.54673	-2.8753	-6.41301	-2.5803	-6.31221
ENSG00000250582	0.991607	0.00620737	SMAD1-AS2	antisense	1.16961	-5.87074	1.87631	-0.260075	-0.041554	-1.13622	-0.340887	-0.213801	-0.781984	0.720963	-2.25467	0.710658	0.294623	-0.580124	1.48081	-0.954655
ENSG00000244055	0.592354	0.00620845	AC007566.10	antisense	-0.739421	-2.4113	1.45939	0.273749	0.794217	-0.538979	0.413202	-0.748838	-0.162256	0.526147	-0.850285	-0.20688	0.676493	-0.146227	0.796072	-0.820354
ENSG00000264083	1.15079	0.00625061	RP11-227G15.9	lincRNA	-2.14381	-5.87074	-2.21115	-6.32616	-0.672909	-3.61427	-0.852388	-2.27609	-3.33218	-4.26393	-6.34214	-2.45927	-4.74977	-6.41301	-3.11082	-6.31221
ENSG00000233214	-1.1859	0.00626021	AC002511.2	lincRNA	-6.23127	-3.06338	-6.11804	-2.41927	-2.09741	-2.72118	-6.40698	-2.66311	-3.33218	-5.84889	-1.13268	-6.54673	-3.52738	-3.60566	-6.28074	-0.885942
ENSG00000259448	0.709586	0.0062669	RP11-16E12.1	lincRNA	-0.348631	-1.96384	1.69574	0.893004	1.32	-1.13622	0.959346	-0.173724	-0.306646	-0.804498	-1.69828	-2.02317	0.941391	-1.12761	0.405757	0.130737
ENSG00000272263	-1.12115	0.00628287	RP11-767C1.2	antisense	-6.23127	-5.87074	-6.11804	-3.51881	-6.34533	-6.42162	-6.40698	-2.66311	-6.13954	-5.84889	-1.21285	-6.54673	-6.33473	-1.88945	-6.28074	-2.40532
ENSG00000253557	0.827616	0.00639046	RP11-1080G15.1	lincRNA	-3.90935	-5.87074	-6.11804	-6.32616	-3.53798	-4.83666	-3.59962	-6.36355	-3.33218	-3.52696	-6.34214	-6.54673	-4.01281	-6.41301	-4.69578	-6.31221
ENSG00000132832	0.954231	0.00640704	RP11-445H22.3	antisense	0.482972	-5.87074	0.451817	-0.899899	-0.00548472	-2.72118	-0.524333	-0.748838	-2.4391	-2.67897	-2.25467	-2.84629	-0.842881	-1.45882	-0.854479	-3.14228
ENSG00000224610	1.23703	0.00641049	RP11-265P11.1	lincRNA	-3.90935	-5.87074	-3.79611	-6.32616	-1.48735	-6.42162	-6.40698	-6.36355	-6.13954	-5.84889	-6.34214	-3.73937	-2.42784	-4.09109	0.774539	-6.31221
ENSG00000237892	0.593919	0.00643147	KLF7-IT1	sense_intronic	4.62282	1.95581	4.28817	2.10429	1.85924	2.26838	3.62231	3.61516	3.5417	4.83498	2.38238	3.24606	3.75934	2.60101	4.28436	2.65069
ENSG00000266973	0.958866	0.00644083	CTD-3162L10.3	antisense	-6.23127	-5.87074	-3.31068	-6.32616	-4.76037	-6.42162	-2.31951	-4.77859	-6.13954	-2.38946	-6.34214	-4.2248	-2.63429	-6.41301	-6.28074	-6.31221
ENSG00000260022	1.22052	0.00644762	LA16c-306A4.1	antisense	1.39078	-2.1703	-1.16384	-1.68231	-1.13588	-6.42162	-0.679056	-6.36355	-0.781984	-2.14845	-1.81858	-0.664087	-0.184987	-1.28373	1.64407	-2.85278
ENSG00000239462	0.897716	0.00655307	CTD-2021J15.1	antisense	-3.90935	-5.87074	-2.03058	-4.7412	-3.53798	-3.61427	-4.82201	-6.36355	-6.13954	-2.67897	-6.34214	-6.54673	-6.33473	-6.41301	-4.69578	-6.31221
ENSG00000232117	0.628969	0.00657011	LINC00384	lincRNA	-1.98335	-1.62281	-1.07364	-2.07824	-1.82177	-3.61427	-0.625617	-3.55619	-2.4391	-1.32533	-2.25467	-2.84629	-1.81117	-2.71257	-1.07129	-2.61177
ENSG00000253653	0.934469	0.00663168	CTC-248O19.1	antisense	-0.616564	-5.87074	-2.21115	-2.86673	-0.730625	-0.995357	-0.792267	-2.27609	-1.28156	-1.32533	-4.75718	-1.68875	-0.720024	-2.16509	0.796072	-1.78864
ENSG00000223806	1.08011	0.00664373	LINC00114	lincRNA	4.96533	2.95263	6.80138	4.11159	1.32	0.927107	4.61192	2.76831	3.79563	6.99011	2.07149	4.25174	6.68016	5.29908	7.14434	3.88132
ENSG00000243902	1.06635	0.00665198	RP1-63G5.5	sense_overlapping	-2.53083	-5.87074	-6.11804	-6.32616	-4.76037	-6.42162	-6.40698	-6.36355	-3.33218	-2.14845	-6.34214	-4.96177	-2.63429	-6.41301	-1.75718	-6.31221
ENSG00000247982	0.685452	0.00666905	LINC00926	lincRNA	4.17067	3.02105	2.9561	2.96155	6.50466	2.79512	3.41161	3.19678	3.83917	3.64496	2.69404	3.2198	4.41597	3.53973	6.26591	3.01647
ENSG00000272906	-1.42661	0.00672937	RP11-533E19.7	lincRNA	-6.23127	-1.34717	-6.11804	-6.32616	-6.34533	-1.29234	-6.40698	-6.36355	0.269855	-5.84889	-1.21285	-6.54673	-6.33473	-6.41301	-6.28074	-1.0268
ENSG00000271199	0.777762	0.00674875	RP13-216E22.5	sense_overlapping	-1.83896	-3.06338	-0.908585	-2.41927	-2.25787	-6.42162	-1.19752	-2.45666	-3.33218	-1.45657	-2.88271	-2.2988	-1.57985	-2.32555	-1.75718	-2.85278
ENSG00000251230	-0.994087	0.00683101	RP11-701P16.5	lincRNA	-0.348631	1.61308	-6.11804	-1.11671	-1.59045	0.23659	-2.70654	-0.871695	-0.411616	-2.14845	0.478041	-2.02317	-1.47675	-0.798304	-1.15146	0.653577
ENSG00000249601	1.07933	0.0068407	CTB-27N1.1	lincRNA	-2.53083	-5.87074	-3.79611	-6.32616	-1.39114	-1.56364	-1.88341	-2.11562	-6.13954	-3.04154	-6.34214	-3.73937	-2.63429	-3.24309	-2.03282	-6.31221
ENSG00000271746	-0.813681	0.00689785	RP1-202O8.3	antisense	-2.53083	-1.78327	-3.31068	-2.07824	-3.53798	-2.72118	-2.70654	-2.11562	-2.4391	-5.84889	-2.6417	-2.84629	-6.33473	-2.71257	-3.47339	-1.78864
ENSG00000228487	0.797351	0.00696974	RP13-225O21.2	antisense	-0.676685	-5.87074	-0.908585	-1.57128	-1.05993	-2.51473	-0.384609	-1.60866	-2.23265	-1.942	-2.09421	-2.45927	-1.38054	-1.88945	-0.995341	-3.50485
ENSG00000250541	1.15887	0.00701875	RP11-302F12.10	antisense	-3.90935	-5.87074	-1.87011	-6.32616	-2.25787	-6.42162	-6.40698	-6.36355	-6.13954	-2.14845	-2.25467	-6.54673	-6.33473	-6.41301	-1.63689	-6.31221
ENSG00000256248	0.933049	0.00706229	RP11-123O10.4	lincRNA	-3.90935	-5.87074	-3.79611	-6.32616	-2.43844	-6.42162	-4.08505	-6.36355	-6.13954	-3.52696	-6.34214	-3.73937	-6.33473	-6.41301	-2.5803	-3.14228
ENSG00000272141	0.943015	0.00712798	RP11-465B22.8	lincRNA	-3.42392	-5.87074	-6.11804	-3.51881	-3.53798	-6.42162	-6.40698	-6.36355	-6.13954	-3.04154	-6.34214	-6.54673	-2.63429	-6.41301	-3.47339	-6.31221
ENSG00000258612	0.621513	0.00714112	RP11-671J11.6	lincRNA	-2.77184	-4.28577	-2.21115	-3.51881	-2.6449	-3.61427	-3.23705	-4.77859	-4.55457	-1.942	-3.53478	-3.73937	-2.24727	-3.60566	-3.47339	-3.50485
ENSG00000271997	-1.43718	0.00714204	RP11-97O12.6	sense_intronic	-6.23127	-1.78327	-6.11804	-6.32616	-6.34533	-0.640262	-6.40698	-6.36355	-0.854134	-5.84889	0.227718	-0.76537	-6.33473	-6.41301	-6.28074	-6.31221
ENSG00000260132	0.869624	0.00719451	LA16c-312E8.2	antisense	-2.77184	-5.87074	-3.31068	-3.51881	-3.53798	-6.42162	-2.94754	-6.36355	-2.6801	-2.67897	-4.75718	-3.0873	-2.24727	-4.09109	-2.19328	-3.50485
ENSG00000262151	0.98911	0.00760865	RP11-876N24.2	antisense	-0.676685	-5.87074	-1.47418	-3.51881	0.16246	-4.09969	-2.31951	-4.77859	-2.96961	-4.26393	-4.02021	-3.3768	-1.81117	-1.36862	-0.788891	-1.78864
ENSG00000233845	0.763796	0.00764394	AC093732.1	antisense	0.614216	-2.1703	1.19484	-0.711454	-0.790746	-1.46743	-0.0319371	-1.31915	-0.208799	0.173475	-4.02021	-0.93202	-0.553374	-0.580124	1.31171	0.226952
ENSG00000235530	0.908724	0.00770375	AC087294.2	antisense	-0.873722	-5.87074	0.357695	-2.41927	-0.116516	-2.33416	-0.476239	-3.55619	-3.81761	-0.990911	-2.09421	-0.71384	-0.908469	-0.580124	-1.42276	-0.885942
ENSG00000267039	1.00648	0.0077389	RP11-58G13.1	antisense	-6.23127	-5.87074	-2.21115	-6.32616	-3.53798	-6.42162	-2.70654	-3.55619	-3.81761	-3.04154	-6.34214	-2.84629	-3.52738	-6.41301	-2.5803	-6.31221
ENSG00000250900	0.79755	0.00774488	CTC-338M12.6	antisense	-2.53083	-2.1703	-1.72572	-2.86673	-2.6449	-3.61427	-2.94754	-4.04162	-3.33218	-1.76143	-6.34214	-4.2248	-1.57985	-2.71257	-2.03282	-4.72724
ENSG00000267764	1.00915	0.00775011	RP11-484L8.1	antisense	-0.449914	-5.87074	-1.26006	-3.51881	-1.95302	-4.83666	-1.19752	-6.36355	-1.89161	-2.67897	-2.43525	-1.33728	-1.29034	-1.45882	-1.63689	-3.14228
ENSG00000248294	1.02213	0.0078229	CTD-2023N9.2	lincRNA	-2.32438	-5.87074	-0.988756	-4.00424	-2.8859	-6.42162	-3.23705	-6.36355	-6.13954	-5.84889	-6.34214	-6.54673	-6.33473	-6.41301	-6.28074	-6.31221
ENSG00000253720	0.74142	0.00782603	RP11-473O4.3	lincRNA	-1.98335	-5.87074	-2.65861	-3.15624	-2.6449	-2.96219	-2.31951	-3.55619	-3.33218	-1.942	-3.53478	-4.2248	-3.52738	-4.82805	-1.23635	-2.85278
ENSG00000241596	0.853326	0.00783397	RP11-326J18.1	sense_intronic	-6.23127	-5.87074	-6.11804	-6.32616	-3.53798	-6.42162	-3.59962	-6.36355	-4.55457	-5.84889	-6.34214	-6.54673	-2.63429	-6.41301	-3.11082	-6.31221
ENSG00000267291	1.03908	0.00791155	CTB-186G2.1	antisense	-2.53083	-5.87074	-2.4176	-4.00424	-1.95302	-6.42162	-4.08505	-6.36355	-6.13954	-5.84889	-3.17221	-6.54673	-2.8753	-2.95358	-2.5803	-6.31221
ENSG00000261124	0.914175	0.00795513	AC135050.5	antisense	-1.27708	-3.06338	-2.03058	-3.51881	-2.25787	-4.09969	-1.36258	-2.66311	-4.55457	-2.14845	-6.34214	-6.54673	-2.42784	-2.50612	-2.5803	-1.91989
ENSG00000256742	0.973967	0.00801329	RP13-941N14.1	lincRNA	-0.945872	-5.87074	0.915384	-0.968612	-1.70148	-3.61427	0.279524	-2.45666	-1.89161	-3.04154	-4.75718	-0.992141	-0.553374	-2.32555	-0.995341	-1.91989
ENSG00000224101	0.759145	0.00802357	ELMO1-AS1	antisense	-3.42392	-5.87074	-4.53308	-6.32616	-6.34533	-6.42162	-4.08505	-4.77859	-6.13954	-5.84889	-6.34214	-6.54673	-3.16481	-4.82805	-3.47339	-6.31221
ENSG00000254649	0.876612	0.00808024	RP11-452H21.2	antisense	-1.37329	-2.4113	-0.0519496	-2.41927	-1.70148	-4.09969	-1.27769	-1.83999	-2.23265	-3.04154	-3.53478	-4.2248	-1.94242	-2.16509	-1.15146	-6.31221
ENSG00000257831	1.20887	0.00814372	RP11-596D21.1	antisense	-1.18688	-5.87074	-0.832637	-1.68231	-1.48735	-4.09969	-1.36258	-3.19362	-1.61597	-5.84889	-6.34214	-4.96177	-0.144909	-2.0207	-0.788891	-6.31221
ENSG00000203327	0.772392	0.00817968	AC012358.7	antisense	-0.398384	-3.54881	0.824476	-0.653739	-0.617414	-3.2517	-0.103196	-2.90412	-0.584947	-0.719609	-1.13268	-1.12046	0.825138	0.705927	0.539435	-0.820354
ENSG00000259876	0.993783	0.00822763	CTD-3037G24.4	antisense	-0.739421	-5.87074	-0.908585	-1.8026	-1.13588	-1.89806	-1.36258	-6.36355	-3.33218	-1.094	-1.58725	-2.15441	-1.29034	-1.05546	0.707941	-1.35801
ENSG00000256967	0.790205	0.00823322	RP11-273B20.1	antisense	1.44821	-2.4113	2.9071	2.08746	2.22831	1.63907	1.52966	-0.432811	1.02034	4.59716	2.32675	1.57739	1.89889	0.457351	2.81465	1.4757
ENSG00000254325	0.809051	0.00823536	RP11-318K15.2	sense_intronic	-3.06135	-5.87074	-3.79611	-2.41927	-1.95302	-4.09969	-1.88341	-4.77859	-6.13954	-3.04154	-4.02021	-3.3768	-2.63429	-3.60566	-2.03282	-3.99028
ENSG00000260271	1.50953	0.00823764	RP1-45N11.1	lincRNA	1.92354	-1.96384	1.53301	-1.68231	0.224521	-4.09969	-0.574087	-2.45666	-2.05207	-5.84889	-6.34214	0.111482	0.742082	-1.88945	3.40751	-3.99028
ENSG00000197934	-1.11133	0.00828048	AP001597.1	antisense	-6.23127	-5.87074	-6.11804	-3.51881	-6.34533	-1.56364	-6.40698	-0.635628	-6.13954	-5.84889	-3.53478	-6.54673	-6.33473	-6.41301	-6.28074	-2.61177
ENSG00000225963	0.633442	0.00830719	AC009950.2	antisense	1.18658	-0.741452	1.72116	1.70174	3.81327	1.10976	2.41001	0.776003	-0.0734469	2.2118	0.528227	1.42481	0.607781	1.08683	1.97192	0.507972
ENSG00000260545	0.914374	0.00837353	CTB-134F13.1	antisense	0.426938	-5.87074	0.824476	-0.493274	-1.21605	-2.51473	-0.915123	-1.50557	-1.61597	-0.234183	-0.31977	-2.84629	0.10821	-0.30449	0.995381	-1.45423
ENSG00000238198	1.14889	0.00840836	RP11-31F15.2	lincRNA	-1.98335	-2.1703	1.08163	-1.28177	-0.672909	-6.42162	0.438514	-2.66311	-0.0734469	-2.38946	-6.34214	-1.68875	-0.606813	-0.858425	0.128647	-3.50485
ENSG00000249348	0.631799	0.0084401	UGDH-AS1	antisense	-0.558848	-0.741452	0.481874	-1.8026	0.854338	-2.17369	0.100818	-0.871695	-0.467111	-0.56349	-2.6417	-0.317911	-0.842881	-0.685094	-0.090919	-2.06428
ENSG00000249478	1.13138	0.00847612	CTB-49A3.5	antisense	-1.98335	-5.87074	-3.31068	-3.51881	-3.53798	-6.42162	-1.88341	-6.36355	-6.13954	-5.84889	-6.34214	-6.54673	-6.33473	-3.60566	-0.788891	-6.31221
ENSG00000263327	1.1211	0.00850864	TAPT1-AS1	antisense	4.66582	-0.444471	4.65097	2.67665	3.188	-1.89806	2.56744	2.26216	2.95058	-0.176467	-1.13268	3.21316	4.29553	2.31831	5.20257	1.96856
ENSG00000224100	0.715294	0.00851726	AP001630.5	antisense	-4.64631	-5.87074	-4.53308	-4.00424	-4.76037	-6.42162	-4.82201	-6.36355	-6.13954	-5.84889	-6.34214	-6.54673	-4.74977	-6.41301	-2.82131	-6.31221
ENSG00000260555	1.16491	0.00864025	RP11-728K20.2	lincRNA	-1.70771	-5.87074	-0.445613	-2.62572	-6.34533	-6.42162	-6.40698	-4.77859	-6.13954	-1.60096	-6.34214	-6.54673	-3.52738	-6.41301	-3.47339	-6.31221
ENSG00000235621	1.51369	0.00864436	LINC00494	lincRNA	2.43761	-1.96384	0.676377	-4.00424	2.66869	-1.13622	-2.15905	-6.36355	0.489821	-2.38946	-1.48416	0.613142	2.94372	-0.798304	4.92077	0.0628326
ENSG00000236734	0.850298	0.00873415	GRIFIN	processed_transcript	-3.06135	-4.28577	-0.832637	-1.46818	-1.95302	-4.83666	-2.01466	-2.90412	-4.55457	-2.67897	-6.34214	-3.0873	-2.8753	-2.95358	-1.07129	-3.50485
ENSG00000229502	0.987184	0.00879809	RP11-52J3.2	antisense	0.398083	-4.28577	2.39371	-0.348884	-0.853482	0.319845	0.993903	0.144247	0.43032	3.91432	-1.48416	0.273449	1.28732	-0.223189	0.289112	-2.06428
ENSG00000237775	0.831348	0.00900043	DDR1-AS1	antisense	-3.42392	-5.87074	-2.65861	-4.7412	-6.34533	-6.42162	-3.59962	-6.36355	-6.13954	-5.84889	-6.34214	-3.73937	-3.52738	-6.41301	-3.95882	-6.31221
ENSG00000254910	0.72412	0.00908277	RP11-326C3.7	antisense	1.36118	-0.316146	2.30403	1.31046	2.50953	1.82155	0.361208	-0.0597674	-0.584947	1.35078	-2.25467	0.953116	0.63105	-1.05546	2.37389	1.03652
ENSG00000255089	0.770743	0.00915239	RP11-326C3.10	antisense	-4.64631	-5.87074	-2.94811	-4.7412	-3.17541	-6.42162	-6.40698	-6.36355	-6.13954	-4.26393	-6.34214	-6.54673	-4.74977	-6.41301	-3.95882	-3.99028
ENSG00000258458	0.965853	0.00918295	CTD-2555K7.2	processed_transcript	-1.70771	-5.87074	-3.31068	-6.32616	-2.25787	-6.42162	-2.94754	-2.90412	-6.13954	-5.84889	-6.34214	-3.73937	-2.63429	-4.09109	-3.11082	-3.50485
ENSG00000229484	0.922189	0.00919794	RP5-888M10.2	lincRNA	0.588905	-1.96384	1.4442	-1.11671	1.10588	-2.51473	1.36781	-0.582188	-0.467111	-3.52696	-2.6417	-0.356905	0.922654	0.156842	1.52016	-2.06428
ENSG00000255340	0.845634	0.00922559	RP11-484D2.5	antisense	-2.77184	-5.87074	-3.79611	-6.32616	-3.53798	-4.83666	-2.70654	-6.36355	-3.33218	-3.04154	-3.17221	-4.2248	-3.16481	-6.41301	-3.47339	-3.14228
ENSG00000259715	0.708097	0.00923447	CTD-3110H11.1	lincRNA	4.05528	-1.01275	3.82007	3.02035	3.53272	2.52966	4.72552	2.7938	3.12021	2.85501	2.85508	2.80862	4.88987	4.36588	3.41796	1.82222
ENSG00000258819	1.1557	0.00928417	RP11-7F17.3	lincRNA	1.58251	0.0119077	0.623428	-2.86673	-0.23681	0.589606	-0.298452	-6.36355	-1.38465	3.88412	-2.09421	0.801999	0.763298	0.381402	0.707941	-0.885942
ENSG00000188825	0.841798	0.00932602	LINC00910	lincRNA	2.20752	2.10081	2.92909	1.33917	2.80187	-0.0465821	4.36038	0.53127	-0.467111	0.259632	-0.152313	2.63566	4.1051	3.55709	3.62163	1.7157
ENSG00000234432	-1.24077	0.00937039	RP11-1275H24.1	lincRNA	-2.53083	-2.1703	-2.4176	-1.46818	-6.34533	-2.72118	-6.40698	-0.432811	0.730829	-5.84889	-2.6417	-1.50234	-6.33473	-6.41301	-3.11082	-2.61177
ENSG00000249870	0.766823	0.00939282	RP11-481C4.1	antisense	-1.02182	-2.1703	-1.47418	-2.07824	-2.09741	-1.89806	-1.549	-3.55619	-2.96961	-1.45657	-6.34214	-2.63984	-1.94242	-2.95358	-1.63689	-3.50485
ENSG00000229848	0.61491	0.0095547	RP13-766D20.2	antisense	-1.18688	-2.1703	-0.988756	-1.8026	-0.15551	-3.2517	-0.852388	-1.40935	-2.6801	-2.38946	-2.88271	-2.02317	-1.69088	-2.0207	-0.854479	-3.14228
ENSG00000266304	0.788599	0.00963966	RP11-484N16.1	lincRNA	-6.23127	-5.87074	-4.53308	-6.32616	-3.53798	-6.42162	-4.08505	-6.36355	-6.13954	-4.26393	-6.34214	-4.2248	-6.33473	-6.41301	-2.5803	-6.31221
ENSG00000230054	0.755762	0.00966175	RP11-402G3.5	lincRNA	-1.83896	-5.87074	-2.21115	-2.62572	-1.21605	-2.51473	-1.88341	-3.55619	-1.89161	-3.04154	-4.75718	-2.45927	-1.57985	-2.95358	-1.52586	-3.50485
ENSG00000232698	0.889874	0.00973453	AP001058.3	lincRNA	0.276521	-1.11585	0.540173	-0.899899	1.00339	-2.0293	1.94617	-3.55619	1.74921	-1.76143	-0.560778	-0.76537	1.09989	-0.30449	2.13288	-0.885942
ENSG00000269900	-1.11395	0.00973683	RMRP	lincRNA	-3.06135	0.538656	-6.11804	-1.46818	-0.15551	-3.2517	-2.01466	-0.530658	0.12725	-2.14845	-1.94982	-0.71384	-6.33473	-1.20356	-3.11082	-0.479317
ENSG00000255142	0.802642	0.00975749	AP006621.6	antisense	-3.42392	-5.87074	0.42112	-2.41927	-1.95302	-3.61427	-2.15905	-3.55619	-3.33218	-3.04154	-3.53478	-3.3768	-1.47675	-2.0207	-1.88843	-3.99028
ENSG00000259799	0.970129	0.00978606	RP11-554A11.9	antisense	-2.53083	-5.87074	-3.31068	-6.32616	-2.43844	-4.83666	-6.40698	-6.36355	-3.33218	-2.38946	-3.53478	-6.54673	-2.8753	-6.41301	-2.5803	-3.14228
ENSG00000230940	0.804466	0.00987079	RP11-32B11.2	processed_transcript	-2.53083	-4.28577	-2.65861	-6.32616	-2.6449	-3.2517	-2.70654	-4.04162	-6.13954	-3.04154	-4.75718	-1.90287	-1.94242	-4.09109	-3.11082	-3.50485

## Sheet: Table S3_D
321 relapse-specific lncRNAs from DUX4 subtype correlated with its cis PC genes. These lncRNAs are enriched signalling and metabolic pathways.
Relapse-specific lncRNAs	Cis PC genes	Pearson correlation rate	P-value
RP11-627G18.1	GATA6	0.973581	4.4395e-53
AC114730.2	PDCD1	0.953296	2.36713e-43
AP001625.6	SLC37A1	0.931853	5.69935e-37
CTD-2530H12.2	DGAT2	0.930251	1.39846e-36
SLC38A3	FLNC	0.928126	4.45439e-36
CTD-2530H12.2	MMP25	0.925847	1.48506e-35
RP11-347C18.3	NDUFAF6	0.922777	7.0792e-35
AP000355.2	UPB1	0.921588	1.27416e-34
AP001189.4	LRRC32	0.920733	1.93339e-34
RP11-377G16.2	PRDM8	0.91959	3.35166e-34
RP11-666A8.7	PRCD	0.915497	2.25208e-33
RP11-228B15.4	ENG	0.914523	3.49243e-33
RP3-329E20.2	MMP25	0.911483	1.33099e-32
RP11-309L24.2	FLNC	0.906447	1.10124e-31
RP11-536K7.5	IL15RA	0.905444	1.65356e-31
RP11-651L5.2	MMP25	0.904577	2.34193e-31
RP5-1180C10.2	LHX4	0.900783	1.03275e-30
RP11-1157N2-B.2	ANKRD30B	0.900723	1.05656e-30
RP3-329E20.2	DGAT2	0.895541	7.29116e-30
AC114730.3	NEU4	0.889593	5.92986e-29
AC093627.12	FAM20C	0.885204	2.58197e-28
RP11-619A14.2	WNT11	0.88403	3.78803e-28
RP11-326C3.2	ATHL1	0.88111	9.65916e-28
AC004837.5	RALA	0.878553	2.14849e-27
AC074289.1	SIGLEC14	0.872141	1.47786e-26
LUCAT1	MMP25	0.871685	1.68818e-26
RP11-18I14.10	C10orf95	0.86911	3.5473e-26
RP11-433J8.1	SBSPON	0.868966	3.69606e-26
LUCAT1	DGAT2	0.866427	7.56397e-26
RP11-575L7.4	KIF27	0.862642	2.14162e-25
RP11-666A8.8	PRCD	0.859989	4.36115e-25
RP11-94C24.11	CACNA1G	0.859814	4.5687e-25
MRPL23-AS1	TTYH1	0.856705	1.03097e-24
RP11-651L5.2	DGAT2	0.85472	1.71647e-24
RP11-672A2.4	LRRC32	0.854618	1.76164e-24
RP11-619A14.2	FKBP5	0.850263	5.24721e-24
RP11-848P1.3	ADAP2	0.846261	1.38863e-23
APCDD1L-AS1	TTYH1	0.843223	2.85326e-23
AC132217.4	IGF2	0.841103	4.6745e-23
RP11-298J20.4	ZRANB1	0.832253	3.40444e-22
RP3-329E20.2	SIGLEC14	0.828794	7.17091e-22
RP11-430C7.4	TMEM105	0.828468	7.68506e-22
CTD-2530H12.2	SIGLEC14	0.828352	7.87674e-22
RP11-434I12.2	RDH10	0.827143	1.01734e-21
RP11-651L5.2	SIGLEC14	0.825711	1.37367e-21
RP11-728F11.4	FXYD6	0.822386	2.72999e-21
AC074289.1	PYGL	0.822198	2.83684e-21
RP13-638C3.3	FOXK2	0.819169	5.23529e-21
ALG13-AS1	ALG13	0.817472	7.34237e-21
RP11-97O12.7	TTYH1	0.816949	8.14433e-21
RP11-666A8.7	NDUFAF6	0.816786	8.41015e-21
RP11-532F12.5	SPINT1	0.816325	9.2112e-21
RP11-267N12.3	SMUG1	0.814002	1.45064e-20
XXbac-B135H6.15	AIFM3	0.813442	1.61723e-20
ALG13-AS1	TRMT2B	0.813388	1.634e-20
LUCAT1	SIGLEC14	0.813288	1.66596e-20
RP11-118B18.1	CD300E	0.811824	2.20827e-20
FAM222A-AS1	FLNC	0.810952	2.60907e-20
RP13-228J13.1	ZNF862	0.809893	3.19114e-20
AC074289.1	MARC1	0.809692	3.31465e-20
RP11-359E3.4	LDB3	0.809047	3.74421e-20
RP11-267N12.3	HDHD2	0.808555	4.10769e-20
RP11-619A14.2	BRMS1L	0.807015	5.48023e-20
ZNRD1-AS1	LHX4	0.803857	9.81751e-20
RP5-888M10.2	ZNF862	0.803191	1.10865e-19
RP13-638C3.3	KMT2E	0.802165	1.33586e-19
AC017076.5	CMPK2	0.801853	1.4136e-19
AC012358.7	ZNF862	0.801787	1.4306e-19
UGDH-AS1	LHX4	0.800783	1.71434e-19
RP5-1180C10.2	SMARCAL1	0.799718	2.07494e-19
DICER1-AS1	ZNF862	0.799197	2.27734e-19
RP5-1086K13.1	ZNF248	0.799018	2.35101e-19
CTD-2011F17.2	UVRAG	0.798919	2.39255e-19
RP5-1180C10.2	SMUG1	0.798502	2.57652e-19
CTD-2528L19.6	ZNF248	0.79791	2.86146e-19
AC009948.5	DET1	0.797516	3.06815e-19
RP11-661O13.1	RAB12	0.796917	3.40957e-19
RP11-267N12.3	SMARCAL1	0.796562	3.62919e-19
AC074289.1	MMP25	0.795847	4.11307e-19
CTD-2006C1.12	LHX4	0.795573	4.31504e-19
TMEM44-AS1	CARD8	0.794357	5.33206e-19
RP5-1180C10.2	DET1	0.794111	5.56401e-19
RP11-333E1.1	ZNF573	0.793694	5.98058e-19
TAPT1-AS1	ZNF862	0.793328	6.37018e-19
IQCH-AS1	LHX4	0.792753	7.03295e-19
STAG3L5P-PVRIG2P-PILRB	PILRB	0.791431	8.82092e-19
LINC00959	LHX4	0.790493	1.03476e-18
ZNRD1-AS1	ZNF573	0.790057	1.11433e-18
TMLHE-AS1	TMLHE	0.789882	1.1477e-18
RP11-428J1.5	RPP40	0.789173	1.29367e-18
RP11-18F14.1	FLNC	0.78914	1.30097e-18
RP11-379F4.4	SMUG1	0.788858	1.36425e-18
ALG13-AS1	MCM3AP	0.788777	1.38308e-18
INTS6-AS1	ZNF862	0.788586	1.42817e-18
RP5-1180C10.2	KIAA1841	0.788145	1.53788e-18
RP5-1180C10.2	CARD8	0.787588	1.68818e-18
RP11-473M20.14	C10orf95	0.785134	2.53728e-18
TMCC1-AS1	DET1	0.784831	2.66746e-18
AC006378.2	DET1	0.784768	2.69534e-18
LINC00959	CARD8	0.784395	2.86586e-18
RP5-888M10.2	ZNF573	0.784196	2.96083e-18
LENG8-AS1	ZNF573	0.783787	3.16643e-18
TMEM44-AS1	DET1	0.783526	3.30475e-18
RP11-806H10.4	CD300LD	0.783196	3.48752e-18
MCM3AP-AS1	ZNF573	0.782799	3.72116e-18
FAM225B	ABCC3	0.782619	3.83169e-18
RP11-619A14.2	TMEM235	0.781561	4.54951e-18
CTD-2245F17.3	CDKL1	0.781368	4.69429e-18
CKMT2-AS1	LHX4	0.780021	5.83259e-18
RP11-333E1.1	PTGR2	0.779974	5.87607e-18
CTB-191K22.6	NAPSA	0.779924	5.92401e-18
RP11-428J1.5	PTCD2	0.779688	6.15232e-18
RP11-379F4.4	LHX4	0.778715	7.18843e-18
RP11-389O22.1	ZNF248	0.777541	8.66392e-18
RP5-886K2.3	SMARCAL1	0.777358	8.91913e-18
AC074289.1	ABCC3	0.776956	9.50402e-18
CTD-2541M15.1	LHX4	0.776654	9.96827e-18
RP11-15E18.1	ZNF862	0.776335	1.04829e-17
RP11-267N12.3	CCDC53	0.775951	1.11367e-17
LINC00959	HDHD2	0.775496	1.19612e-17
LENG8-AS1	LHX4	0.775422	1.21004e-17
RP11-418J17.1	DET1	0.775347	1.22443e-17
RP11-576N17.5	NAPSA	0.774997	1.29334e-17
RP5-888M10.2	TMLHE	0.774993	1.2942e-17
RP11-473M20.14	LHX4	0.774747	1.34502e-17
FAM225B	HOOK1	0.774663	1.3628e-17
RP11-267N12.3	PTCD2	0.774131	1.48072e-17
IQCH-AS1	C10orf95	0.773413	1.65562e-17
LENG8-AS1	CARD8	0.772964	1.77498e-17
RP5-1086K13.1	CD58	0.771704	2.15598e-17
OSER1-AS1	C2orf74	0.771676	2.16515e-17
AD000090.2	MADCAM1	0.771433	2.24754e-17
RP11-1055B8.4	TTYH1	0.771357	2.27406e-17
ALG13-AS1	TMLHE	0.770707	2.51234e-17
RP11-379F4.4	CIITA	0.770199	2.71535e-17
ZBED3-AS1	DET1	0.769221	3.15143e-17
RP11-18I14.10	LHX4	0.768353	3.59479e-17
RP5-1180C10.2	ZNF248	0.76797	3.80942e-17
RP11-572M11.3	TTYH1	0.766696	4.61483e-17
SLC38A3	GNAT1	0.766067	5.07088e-17
RP11-35J23.1	TMLHE	0.766064	5.07273e-17
RP11-619A14.2	LRRC1	0.766063	5.07375e-17
RP11-672A2.4	FOXA2	0.76463	6.28184e-17
RP5-888M10.2	CARD8	0.764382	6.51733e-17
LINC00959	SMARCAL1	0.764269	6.62781e-17
RP11-333E1.1	TMLHE	0.763967	6.93075e-17
ZNRD1-AS1	KIAA1841	0.763865	7.03599e-17
RP3-329E20.2	ECE1	0.76359	7.3286e-17
RP11-267N12.3	LHX4	0.763582	7.33664e-17
LINC00959	SMUG1	0.763452	7.4791e-17
RP11-428J1.5	DCP1B	0.763226	7.73262e-17
RP11-122G18.5	ZNF248	0.762461	8.65453e-17
RP11-118B18.1	FAM20A	0.761925	9.36346e-17
RP11-806H10.4	MMP25	0.761916	9.37602e-17
RP11-318M2.2	BAALC	0.761851	9.46562e-17
LENG8-AS1	DET1	0.761739	9.62228e-17
RP11-523O18.1	LRRC18	0.761672	9.71635e-17
RP11-347C18.3	PRCD	0.76156	9.87701e-17
RP11-536K7.5	IL2RA	0.761441	1.0051e-16
LINC00959	DET1	0.761011	1.07028e-16
RP13-228J13.1	TMLHE	0.760172	1.20935e-16
RP11-379F4.4	SMARCAL1	0.759929	1.25273e-16
UGDH-AS1	CIITA	0.759646	1.30519e-16
CTD-2541M15.1	DET1	0.759534	1.3266e-16
OSER1-AS1	SMUG1	0.759232	1.38598e-16
CTD-2245F17.3	ZNF573	0.758991	1.43511e-16
RP5-1180C10.2	RAD50	0.758967	1.43997e-16
RP11-74C13.3	ETNK2	0.758469	1.5472e-16
RP5-1180C10.2	CRELD1	0.75846	1.54941e-16
AC074289.1	HOOK1	0.758295	1.5865e-16
RP11-418J17.1	SMARCAL1	0.757356	1.81566e-16
RP11-35G9.3	CCDC91	0.757251	1.84338e-16
RP5-1180C10.2	HDHD2	0.756848	1.95264e-16
AC007551.3	TMLHE	0.756336	2.10086e-16
AC005224.2	SMUG1	0.755033	2.52865e-16
RP11-575L7.4	TMLHE	0.754687	2.65559e-16
RP11-806H10.4	SIGLEC14	0.754637	2.67463e-16
CKMT2-AS1	SMARCAL1	0.754246	2.8264e-16
TMCC1-AS1	ZNF248	0.754165	2.85896e-16
RP5-1180C10.2	BLNK	0.753992	2.92942e-16
RP11-576N17.5	ZNF573	0.753201	3.27483e-16
AC009501.4	ZNF248	0.753079	3.33145e-16
CKMT2-AS1	CARD8	0.752926	3.40387e-16
RP11-260M19.2	C14orf144	0.752621	3.55243e-16
RP5-1180C10.2	FAN1	0.752191	3.77265e-16
RP4-655J12.4	ZNF248	0.752175	3.78133e-16
RP11-967K21.1	CIITA	0.751638	4.0761e-16
RP5-886K2.3	DET1	0.751293	4.27683e-16
FAM225A	HOOK1	0.751102	4.39185e-16
UGDH-AS1	ZNF573	0.750547	4.74428e-16
RP11-523O18.5	TTYH1	0.750379	4.85619e-16
CTD-2541M15.1	ZNF862	0.749761	5.29005e-16
RP11-87C12.5	CD84	0.748684	6.13649e-16
CCND2-AS1	TTYH1	0.748518	6.27805e-16
RP11-35G9.3	SMARCAL1	0.748002	6.73965e-16
IQCH-AS1	RAD50	0.747935	6.80119e-16
RP5-1180C10.2	PTCD2	0.747785	6.94288e-16
RP5-1180C10.2	CEP41	0.747738	6.98743e-16
RP11-333E1.1	CARD8	0.747621	7.10054e-16
RP11-473M20.14	CARD8	0.747543	7.17715e-16
ZNRD1-AS1	PTCD2	0.74749	7.22939e-16
CTD-2528L19.6	KIAA1841	0.747468	7.25064e-16
RP11-94C24.11	SOX13	0.747132	7.59161e-16
RP11-308D16.4	GEMIN8	0.747076	7.64931e-16
AC009948.5	ZNF862	0.746712	8.03963e-16
AC009948.5	LHX4	0.746313	8.48783e-16
OSER1-AS1	SMARCAL1	0.746265	8.54325e-16
RP11-418J17.1	ZNF573	0.746016	8.83729e-16
RP11-576N17.5	TMLHE	0.745864	9.02266e-16
ZNRD1-AS1	SMARCAL1	0.745471	9.51563e-16
FAM225A	ABCC3	0.745299	9.74046e-16
RP5-888M10.2	LHX4	0.745224	9.8404e-16
AC009948.5	CIITA	0.745204	9.86605e-16
RP11-295M18.2	CIITA	0.743573	1.22944e-15
RP5-888M10.2	TRMT2B	0.743322	1.2715e-15
AC098820.3	ZNF573	0.743275	1.27948e-15
LENG8-AS1	CIITA	0.742653	1.39071e-15
IQCH-AS1	FAN1	0.742492	1.42102e-15
RP11-122G18.5	LHX4	0.742451	1.42872e-15
RP11-379F4.4	ZNF573	0.741891	1.53965e-15
RP11-54O7.18	EGR3	0.741841	1.55001e-15
AF131216.5	INS	0.741785	1.56159e-15
RP11-885B4.2	ZNF862	0.741607	1.59912e-15
AD000090.2	CTBP1	0.741426	1.63797e-15
RP11-35G9.3	SMUG1	0.741031	1.72641e-15
SOCS2-AS1	NDUFAF6	0.740073	1.95987e-15
LINC00959	ZNF862	0.739964	1.98839e-15
UGDH-AS1	KIAA1841	0.739566	2.09575e-15
LENG8-AS1	MADCAM1	0.739462	2.12469e-15
MCM3AP-AS1	MCM3AP	0.739338	2.15949e-15
AC017116.11	DBNL	0.738993	2.26003e-15
RP11-473M20.14	ZNF862	0.738702	2.34802e-15
RP11-1079K10.3	TMLHE	0.738543	2.39774e-15
CTD-2223O18.1	KIF26A	0.73852	2.40497e-15
RP11-267N12.3	CCDC91	0.738355	2.45736e-15
RP11-328D5.1	TTYH1	0.738308	2.47277e-15
RP5-1180C10.2	CCDC91	0.738086	2.54555e-15
RP11-355N15.1	LIPC	0.73801	2.57101e-15
AC007551.3	ZNF862	0.737964	2.58655e-15
RP11-685M7.3	ZNF862	0.737942	2.59416e-15
ALG13-AS1	ZNF470	0.737206	2.85626e-15
RP11-18I14.10	HDHD2	0.73704	2.91867e-15
AC006378.2	BET1	0.736971	2.94512e-15
CKMT2-AS1	ZNF573	0.736792	3.01458e-15
CKMT2-AS1	SMUG1	0.736537	3.11605e-15
RP11-54O7.18	ALPK2	0.736274	3.22448e-15
RP11-333E1.1	ZNF846	0.736103	3.29688e-15
RAD51-AS1	CAPS	0.735974	3.35291e-15
RP11-540B6.6	FAN1	0.735714	3.46756e-15
RP5-1180C10.2	GEMIN8	0.735607	3.51597e-15
CTD-2541M15.1	FAN1	0.73518	3.71606e-15
RP11-10K16.1	NDUFAF6	0.734948	3.82879e-15
AC006378.2	LHX4	0.734713	3.94709e-15
AC009501.4	DET1	0.734502	4.05603e-15
RP11-459E5.1	EGR3	0.734268	4.18012e-15
RP11-459E5.1	FOXA2	0.733964	4.34669e-15
RP5-1180C10.2	ANAPC7	0.733742	4.47274e-15
INTS6-AS1	SMUG1	0.733622	4.542e-15
AC009948.5	SMARCAL1	0.733308	4.7285e-15
RP5-1180C10.2	CCDC53	0.733251	4.76357e-15
RP11-418J17.1	LHX4	0.732833	5.02535e-15
LINC00959	CCDC91	0.732607	5.1729e-15
ZNRD1-AS1	CARD8	0.732277	5.39545e-15
AC006378.2	CIITA	0.732185	5.45887e-15
OSER1-AS1	ZNF607	0.732042	5.55961e-15
CTD-2245F17.3	NAPSA	0.731843	5.7023e-15
RP11-418J17.1	ZNF248	0.731722	5.79077e-15
IQCH-AS1	DET1	0.731716	5.79532e-15
RP11-473M20.14	HDHD2	0.731531	5.93302e-15
AC009501.4	CARD8	0.731013	6.3368e-15
RP11-186F10.2	TTYH1	0.730227	7.00057e-15
RP5-886K2.3	PTCD2	0.730043	7.16514e-15
IQCH-AS1	CEP41	0.729902	7.29399e-15
RP11-305E17.6	PTCD2	0.729607	7.57096e-15
LINC00163	ADARB1	0.729479	7.69383e-15
LINC00959	KIAA1841	0.729312	7.85687e-15
CTD-2541M15.1	C10orf95	0.728715	8.47028e-15
RP11-333E1.1	INTS3	0.728635	8.55597e-15
RP11-305E17.6	LHX4	0.72841	8.80022e-15
ZNRD1-AS1	TMEM106A	0.728237	8.99323e-15
MCM3AP-AS1	ZNF862	0.72783	9.46346e-15
AC074289.1	ECE1	0.727717	9.59851e-15
RP11-379F4.4	CARD8	0.727649	9.68088e-15
RP11-428J1.5	SMARCAL1	0.727572	9.77478e-15
AC098820.3	CARD8	0.727368	1.00266e-14
RP11-428J1.5	HDHD2	0.727358	1.00397e-14
CTD-2245F17.3	TMLHE	0.727274	1.01448e-14
IQCH-AS1	SMARCAL1	0.72699	1.05113e-14
UGDH-AS1	SMARCAL1	0.726795	1.07696e-14
INTS6-AS1	C10orf95	0.726393	1.13215e-14
AD000090.2	TTYH1	0.726035	1.18364e-14
AP000355.2	ATP13A3	0.725813	1.21676e-14
MRPL23-AS1	ANAPC7	0.725781	1.22155e-14
RP11-796E2.4	CMTM8	0.72549	1.26645e-14
RP5-1086K13.1	SMARCAL1	0.725197	1.31325e-14
AC093627.12	ECE1	0.725004	1.3449e-14
AC004837.4	RALA	0.724996	1.3463e-14
RP11-359G22.2	ZNF248	0.724937	1.35605e-14
RP11-1055B8.4	RP11-1055B8.7	0.724581	1.41704e-14
DICER1-AS1	C10orf95	0.724442	1.44158e-14
OSER1-AS1	KIAA1841	0.724426	1.44438e-14
RP5-886K2.3	CARD8	0.724325	1.46256e-14
TOB1-AS1	TMLHE	0.723946	1.53237e-14
RP11-692D12.1	ZNF862	0.723649	1.5893e-14
RP11-267N12.3	CARD8	0.723367	1.64522e-14
RP5-886K2.3	ZNF573	0.723335	1.65183e-14
RP5-888M10.2	CIITA	0.723261	1.66677e-14
LENG8-AS1	FAN1	0.723104	1.69921e-14
RP4-655J12.4	CD58	0.722993	1.72255e-14
RP11-18I14.10	OBFC1	0.722894	1.74354e-14
ZNRD1-AS1	NAPSA	0.722849	1.75318e-14
AD000090.2	ANAPC7	0.722727	1.77951e-14
RP5-886K2.3	ZNF248	0.722686	1.78848e-14
IQCH-AS1	CARD8	0.722087	1.92421e-14
ZNRD1-AS1	ZNF248	0.722053	1.93219e-14
LENG8-AS1	ZNF248	0.721785	1.9964e-14
CTD-2006K23.1	NMUR1	0.721411	2.08949e-14
RP11-389O22.1	UGDH	0.721382	2.09681e-14
RP11-18I14.10	SMARCAL1	0.721206	2.14238e-14
ZNRD1-AS1	ZNF846	0.721194	2.14536e-14
LENG8-AS1	SMARCAL1	0.721108	2.16801e-14
INTS6-AS1	MADCAM1	0.7206	2.30588e-14
RP11-1079K10.3	ZNF862	0.720489	2.33693e-14
CTD-2528L19.6	ZNF573	0.720368	2.37147e-14
CTD-2245F17.3	TRMT2B	0.720275	2.39848e-14
RP3-414A15.2	ZNF573	0.720255	2.40433e-14
AC074289.1	DGAT2	0.720156	2.43331e-14
RP11-651L5.2	PYGL	0.72009	2.45259e-14
RP11-18I14.10	CCDC53	0.720023	2.47257e-14
ZNRD1-AS1	TMLHE	0.719398	2.66662e-14
RP11-379F4.4	PTCD2	0.719228	2.72172e-14
BDNF-AS	BLNK	0.71922	2.7245e-14
CTC-301O7.4	SEMA4B	0.719117	2.7584e-14
RP11-54A4.2	UPB1	0.719107	2.76163e-14
AC009501.4	SMUG1	0.719019	2.7912e-14
AC007551.3	GEMIN7	0.718935	2.81941e-14
RP11-305E17.6	SMARCAL1	0.71869	2.9037e-14
RP11-347C18.3	OBFC1	0.718407	3.00435e-14
CTD-2006C1.12	ZNF763	0.718268	3.05485e-14
RP11-267N12.3	CEP41	0.718186	3.08518e-14
AC007551.3	PTGR2	0.718121	3.10919e-14
RP11-308D16.4	KIAA1841	0.717826	3.22125e-14
AC009501.4	SMARCAL1	0.717716	3.26394e-14
RP5-888M10.2	NAPSA	0.717681	3.27773e-14
RP11-576N17.5	ZNF862	0.717573	3.32006e-14
RP5-886K2.3	CEP41	0.717393	3.39251e-14
CKMT2-AS1	ZNF607	0.717351	3.4097e-14
RP5-1180C10.2	ZNF862	0.717196	3.47353e-14
CKMT2-AS1	CCDC91	0.717178	3.48077e-14
RP5-1180C10.2	CTBP1	0.717028	3.54384e-14
RP11-682N22.1	SMUG1	0.716825	3.63047e-14
CKMT2-AS1	KIAA1841	0.716667	3.69962e-14
CTD-2541M15.1	CIITA	0.716461	3.79162e-14
AC098820.3	NAPSA	0.716382	3.82734e-14
LENG8-AS1	SMUG1	0.716194	3.91406e-14
RP11-576N17.5	PTGR2	0.716108	3.95416e-14
RP5-888M10.2	INTS3	0.715889	4.05845e-14
RP11-977G19.12	ZNF248	0.715851	4.07715e-14
RP11-35G9.3	C2orf74	0.715736	4.13311e-14
RP1-93H18.1	TMEM106A	0.715672	4.16468e-14
RP11-389O22.1	TRNAU1AP	0.715515	4.243e-14
MCM3AP-AS1	LHX4	0.71546	4.27082e-14
RP11-35G9.3	HDHD2	0.715416	4.2929e-14
AC102953.6	INTS1	0.715269	4.36842e-14
RP11-35J23.1	PTGR2	0.715176	4.41674e-14
RP11-35J23.1	ZNF573	0.715152	4.4296e-14
CTD-2006C1.12	KIAA1841	0.715023	4.49766e-14
RP11-379F4.4	DET1	0.714642	4.70467e-14
RP11-575L7.2	ZNF573	0.714528	4.76861e-14
RP11-333E1.1	SMARCAL1	0.714467	4.80311e-14
RP11-10K16.1	ZNF862	0.714411	4.83524e-14
INTS6-AS1	TMLHE	0.713782	5.20754e-14
RP11-682N22.1	DET1	0.713756	5.22344e-14
RP5-888M10.2	GEMIN8	0.713476	5.39847e-14
RAD51-AS1	FAN1	0.713201	5.57559e-14
RP11-486L19.2	ADAD2	0.713088	5.65028e-14
RP11-1079K10.3	TRMT2B	0.712964	5.73261e-14
RP11-575L7.4	CCDC91	0.712787	5.85327e-14
RP11-122G18.5	PTCD2	0.712642	5.95327e-14
RP11-575L7.4	ZNF862	0.712622	5.96708e-14
CTD-2541M15.1	SMARCAL1	0.712556	6.0139e-14
RP11-876N24.4	ZNF862	0.71232	6.18226e-14
AC114730.2	GNAS	0.712211	6.26143e-14
AC005224.2	DET1	0.71171	6.63886e-14
ZNRD1-AS1	ZNF862	0.71124	7.01302e-14
AP001625.6	B4GALNT4	0.710951	7.2531e-14
RP11-118B18.1	CD300LD	0.710924	7.27567e-14
RP11-619A14.2	LSS	0.710701	7.46679e-14
RP11-682N22.1	BET1	0.710614	7.54327e-14
AC009948.5	CARD8	0.710573	7.57884e-14
RP3-414A15.2	LHX4	0.710116	7.99186e-14
RP3-414A15.2	ZNF862	0.710075	8.02958e-14
AC009501.4	RHBDD1	0.709956	8.14124e-14
CTD-3116E22.7	KANK1	0.709593	8.49069e-14
AC006378.2	SMARCAL1	0.709338	8.74527e-14
RP11-619A14.2	RGPD6	0.70916	8.92678e-14
AC093627.12	SIGLEC14	0.709002	9.0907e-14
AC017116.11	GEMIN7	0.708974	9.12054e-14
RP5-1086K13.1	ZNF573	0.708969	9.12529e-14
RP11-15F12.1	PRSS27	0.708813	9.29124e-14
UGDH-AS1	PTCD2	0.70875	9.35912e-14
LA16c-306A4.1	LMF1	0.708748	9.36067e-14
RP11-967K21.1	DET1	0.708745	9.36372e-14
AD000090.2	C10orf95	0.708664	9.45159e-14
RBFADN	RPP40	0.708622	9.49773e-14
RP11-18I14.10	FAN1	0.708513	9.61821e-14
RP11-10K16.1	PRCD	0.708338	9.81418e-14
RP11-651L5.2	ECE1	0.708279	9.88022e-14
AC098820.3	ZNF862	0.708266	9.89485e-14
LENG8-AS1	ZNF862	0.708259	9.90345e-14
DICER1-AS1	NDUFAF6	0.708179	9.99477e-14
CTD-2283N19.1	ZBED5	0.708063	1.01294e-13
RP5-888M10.2	TMEM106A	0.707932	1.02821e-13
AC009948.5	CCDC91	0.707507	1.0797e-13
AC012309.5	PTGR2	0.707477	1.08343e-13
RP11-473M20.14	MADCAM1	0.707423	1.09006e-13
FAM225B	AIFM3	0.70732	1.10306e-13
AC009948.5	CEP41	0.707269	1.1095e-13
RP5-1086K13.1	DET1	0.707151	1.12463e-13
ZBED3-AS1	RAD50	0.707067	1.13554e-13
UGDH-AS1	CARD8	0.706919	1.15493e-13
TMEM44-AS1	SMUG1	0.706768	1.17497e-13
AC007551.3	ZNF846	0.706749	1.17754e-13
RP11-932O9.7	PTGR2	0.706694	1.18497e-13
CTD-3064H18.4	ZNF793	0.706619	1.19517e-13
RP5-1086K13.1	KIAA1841	0.706489	1.213e-13
RP11-267N12.3	DET1	0.706179	1.25676e-13
RP11-528G1.2	CD84	0.706047	1.27585e-13
RP11-333E1.1	CCDC53	0.705987	1.28456e-13
LINC00959	GLCCI1	0.705536	1.35223e-13
LINC00163	GNG13	0.705443	1.36662e-13
AD000090.2	DET1	0.70534	1.38273e-13
MCM3AP-AS1	NAPSA	0.705269	1.3939e-13
CCND2-AS2	CIITA	0.705239	1.39866e-13
AC114730.2	GAL3ST2	0.705237	1.39899e-13
RP11-295M18.2	DET1	0.705196	1.40547e-13
CTD-2555O16.1	CDKL1	0.705148	1.4132e-13
RP11-575L7.2	LHX4	0.705071	1.42565e-13
CTD-2528L19.6	CARD8	0.704808	1.46871e-13
RP11-18I14.10	DET1	0.704678	1.49053e-13
TMEM44-AS1	CCDC91	0.704548	1.51277e-13
RP11-575L7.4	CDKL1	0.704533	1.51526e-13
RP11-267N12.3	KIAA1841	0.704439	1.53151e-13
CTD-2283N19.1	FBXO38	0.704412	1.53621e-13
TMCC1-AS1	SMARCAL1	0.704355	1.5462e-13
RP11-162G10.5	ZNF248	0.704279	1.55955e-13
RP11-295M18.2	FMO5	0.704158	1.58094e-13
RP5-1180C10.2	CIITA	0.70404	1.60213e-13
RP11-433J8.1	NTN3	0.703931	1.62198e-13
AP001625.6	FOXA2	0.703361	1.7298e-13
RP11-452L6.1	MADCAM1	0.703354	1.73125e-13
RP11-932O9.7	ZNF573	0.703262	1.74927e-13
RP11-379F4.4	HDHD2	0.703002	1.8013e-13
SRRM2-AS1	FMO5	0.702785	1.84562e-13
AC009501.4	LHX4	0.702691	1.86524e-13
RP11-418J17.1	SMUG1	0.702546	1.89589e-13
RP11-692D12.1	TMEM106A	0.702537	1.89798e-13
INTS6-AS1	CIITA	0.702351	1.93787e-13
CKMT2-AS1	ZNF248	0.702261	1.95761e-13
CTD-2555O16.1	NAPSA	0.702098	1.99383e-13
AC009948.5	SMUG1	0.701897	2.03914e-13
RP11-876N24.4	STX16	0.701773	2.06779e-13
RP11-1100L3.8	NR4A1	0.70151	2.12952e-13
SPTY2D1-AS1	CD84	0.701382	2.16008e-13
RP11-742D12.2	ST8SIA5	0.701126	2.22284e-13
RP5-1086K13.1	CARD8	0.701125	2.22308e-13
RP5-1086K13.1	PTCD2	0.701056	2.24032e-13
IQCH-AS1	CRELD1	0.700998	2.25476e-13
RP11-87C12.5	CIITA	0.700398	2.41089e-13
CKMT2-AS1	PTCD2	0.700045	2.50747e-13
SRRM2-AS1	TTYH1	0.699936	2.53795e-13
AC012358.7	TMLHE	0.699927	2.54041e-13
RP5-1180C10.2	C10orf95	0.699817	2.57164e-13
RP11-23J9.4	CCDC180	0.699735	2.59538e-13
RP11-418J17.1	GEMIN8	0.69966	2.61698e-13
RP11-267N12.3	ARMC10	0.699434	2.68334e-13
ZNRD1-AS1	METTL4	0.6991	2.78458e-13
CTD-2006C1.12	CCDC91	0.698753	2.89353e-13
RP5-886K2.3	LHX4	0.698554	2.9579e-13
LENG8-AS1	CRELD1	0.698545	2.96084e-13
ZBED3-AS1	FAN1	0.698429	2.9991e-13
RP11-35G9.3	METTL4	0.69832	3.03533e-13
RP5-1180C10.2	FITM2	0.698265	3.05408e-13
SRRM2-AS1	DET1	0.698109	3.10694e-13
INTS6-AS1	ZNF763	0.697755	3.23062e-13
RP11-428J1.5	GPR89B	0.697717	3.2443e-13
RP11-267N12.3	C10orf95	0.697685	3.25552e-13
ZNRD1-AS1	CRELD1	0.697677	3.25858e-13
CTD-2006K23.1	LGALS9C	0.697624	3.27755e-13
LINC00959	CCDC53	0.697542	3.30712e-13
RP11-588G21.2	BEST3	0.697376	3.36817e-13
CTD-2530H12.2	ECE1	0.697192	3.43688e-13
RP5-1180C10.2	HEXDC	0.697171	3.44487e-13
RP11-428J1.5	ZNF248	0.696953	3.52862e-13
TMEM44-AS1	RAD50	0.696847	3.56994e-13
INTS6-AS1	LHX4	0.696837	3.57381e-13
PRRT3-AS1	ZNF846	0.696689	3.63223e-13
RP11-473M20.14	ZNF573	0.696629	3.65624e-13
RP11-35G9.3	HEXDC	0.69637	3.76158e-13
USP46-AS1	LHX4	0.696292	3.79348e-13
AC012358.7	TRMT2B	0.696081	3.88214e-13
INTS6-AS1	TMEM106A	0.696067	3.88845e-13
AC005224.2	SMARCAL1	0.695716	4.04045e-13
RP5-1086K13.1	CEP41	0.695689	4.0522e-13
RP11-80H8.4	MGAT5B	0.695607	4.08875e-13
TMEM44-AS1	LHX4	0.695542	4.11805e-13
RP11-473M20.14	KIAA1841	0.695529	4.12372e-13
CTD-2561B21.10	NDUFAF6	0.695494	4.13957e-13
RP11-473M20.14	DET1	0.695409	4.17791e-13
AP001189.4	FOXA2	0.695274	4.24003e-13
TMCC1-AS1	CEP41	0.695106	4.31829e-13
IQCH-AS1	HDHD2	0.695081	4.33014e-13
RP11-218L14.4	TRMT2B	0.695031	4.35379e-13
RP5-1086K13.1	MADCAM1	0.694671	4.52779e-13
RP5-888M10.2	ZNF763	0.694644	4.54096e-13
RP11-960L18.1	SMUG1	0.69463	4.54795e-13
RP11-473M20.14	FAN1	0.694619	4.55327e-13
UGDH-AS1	CCDC53	0.694555	4.58531e-13
AC007327.5	CORO1C	0.694285	4.72167e-13
ZBED3-AS1	SMARCAL1	0.694105	4.81503e-13
AC068039.4	CIITA	0.694037	4.8507e-13
AC104532.4	ZNF862	0.693885	4.93149e-13
RP11-428J1.5	CNPY2	0.693875	4.93682e-13
CKMT2-AS1	RHBDD1	0.693718	5.02135e-13
CCND2-AS2	FMO5	0.693615	5.07773e-13
RP5-1180C10.2	TAF6	0.693342	5.22984e-13
RP11-18I14.10	PTCD2	0.693284	5.263e-13
RP11-379F4.4	ZNF862	0.693266	5.27317e-13
RP11-576N17.5	CDKL1	0.693051	5.39706e-13
AD000090.2	FITM2	0.692998	5.42824e-13
LINC00959	DBNL	0.692985	5.43559e-13
RP11-333E1.1	GEMIN7	0.692942	5.46111e-13
RP11-267N12.3	C2orf74	0.692871	5.50303e-13
CTD-2528L19.6	PTCD2	0.692849	5.51623e-13
AC009948.5	ZNF573	0.692831	5.52687e-13
FAM225A	AIFM3	0.692714	5.59728e-13
CTB-179K24.3	CARD8	0.69226	5.8781e-13
RP3-414A15.2	DET1	0.692198	5.91729e-13
RP11-379F4.4	ZNF248	0.692177	5.93105e-13
RP11-418J17.1	FITM2	0.692123	5.96541e-13
ZNRD1-AS1	CCDC53	0.691965	6.06744e-13
AC005775.2	CIITA	0.691954	6.07498e-13
RP11-418J17.1	CARD8	0.69185	6.14351e-13
RP11-576N17.5	LHX4	0.691785	6.18605e-13
MCM3AP-AS1	INTS3	0.69155	6.3446e-13
RP11-572M11.3	ANAPC7	0.691545	6.34791e-13
PRRT3-AS1	HEXDC	0.691473	6.39717e-13
ALG13-AS1	GEMIN7	0.691427	6.42908e-13
RP11-18I14.10	ARMC10	0.691348	6.48374e-13
RP11-473M20.14	CTBP1	0.691189	6.59546e-13
AC098820.3	GEMIN7	0.691167	6.61097e-13
TMEM44-AS1	FAN1	0.691059	6.68757e-13
RP11-328D5.1	CD34	0.690952	6.76509e-13
CTC-241F20.3	MED8	0.690942	6.77221e-13
RP11-967K21.1	LHX4	0.690918	6.78954e-13
RP11-229P13.20	C10orf95	0.690881	6.81623e-13
RP11-18I14.10	ZNF846	0.690834	6.85069e-13
CKMT2-AS1	DET1	0.690805	6.87203e-13
AC098820.3	SMARCAL1	0.690797	6.87777e-13
RP5-1180C10.2	ZNF573	0.690682	6.96314e-13
SEC24B-AS1	ZNF862	0.690545	7.06637e-13
CTD-2528L19.6	ZNF607	0.690512	7.09147e-13
TMEM44-AS1	DBT	0.690241	7.29972e-13
AC007551.3	TRMT2B	0.690216	7.31889e-13
RP11-333E1.1	DBNL	0.690213	7.32179e-13
RP11-473M20.14	ZNF846	0.690138	7.38071e-13
CTD-2006C1.12	HDHD2	0.690116	7.39773e-13
CKMT2-AS1	SLAMF6	0.690039	7.45882e-13
TMLHE-AS1	ZNF862	0.68981	7.64334e-13
RP11-333E1.1	HDHD2	0.689782	7.66627e-13
CKMT2-AS1	CIITA	0.68977	7.67616e-13
RP11-218M22.1	C10orf95	0.689756	7.68761e-13
SOCS2-AS1	CARD8	0.68973	7.70874e-13
RP13-228J13.1	LHX4	0.689616	7.80303e-13
RP11-477N3.1	ZNF862	0.689585	7.8291e-13
ZNF205-AS1	ZNF846	0.689485	7.91269e-13
RP11-54O7.18	FOXA2	0.689418	7.96955e-13
RP11-1079K10.3	ZNF652	0.689026	8.30842e-13
LINC00959	HEXDC	0.688922	8.40105e-13
RP11-428J1.5	ARMC10	0.688899	8.42145e-13
RP3-414A15.2	INTS3	0.68877	8.53755e-13
RP11-379F4.4	KIAA1841	0.688727	8.57735e-13
TAPT1-AS1	TMLHE	0.688679	8.62093e-13
CTD-2006C1.12	FAN1	0.688652	8.64594e-13
TMLHE-AS1	TMEM106A	0.688615	8.67928e-13
RP11-806H10.4	DGAT2	0.688542	8.74763e-13
RP11-568J23.5	PPM1B	0.688019	9.24593e-13
AC005625.1	CATSPERG	0.687951	9.31272e-13
TMEM44-AS1	DBNL	0.687917	9.34623e-13
DICER1-AS1	MADCAM1	0.687902	9.36139e-13
AC006378.2	SMUG1	0.687651	9.6135e-13
IQCH-AS1	CIITA	0.687579	9.68643e-13
RP5-1180C10.2	MADCAM1	0.687507	9.76042e-13
OSER1-AS1	HDHD2	0.687457	9.81206e-13
AC098820.3	SMUG1	0.687011	1.02855e-12
RP11-452L6.1	ZNF862	0.686972	1.03278e-12
SLC38A3	GPR32	0.686963	1.03377e-12
AC005224.2	BET1	0.686874	1.0435e-12
RP5-886K2.3	SMUG1	0.68678	1.05384e-12
ZNF205-AS1	TMLHE	0.686757	1.05645e-12
USP46-AS1	ZNF573	0.686662	1.06709e-12
AD000090.2	RP11-1055B8.7	0.686527	1.08229e-12
ZNF205-AS1	INTS3	0.686494	1.08613e-12
RP11-305E17.6	HDHD2	0.686371	1.10025e-12
IGF2-AS	CD84	0.686244	1.11499e-12
CTD-2006C1.12	CARD8	0.686055	1.13747e-12
UGDH-AS1	SMUG1	0.685984	1.14592e-12
AC005775.2	LHX4	0.685859	1.16113e-12
RP11-425I13.3	TMEM141	0.685746	1.17496e-12
RP3-467K16.4	MMP25	0.68574	1.1757e-12
RP11-473M20.14	NDUFAF6	0.685664	1.18508e-12
OSER1-AS1	CIITA	0.685566	1.19727e-12
UGDH-AS1	TMEM106A	0.685414	1.21657e-12
RP11-389O22.1	WDR4	0.685379	1.22101e-12
MCM3AP-AS1	SMARCAL1	0.685103	1.25679e-12
AP001625.6	GAL3ST2	0.685099	1.25739e-12
RP11-1055B8.4	ANAPC7	0.684946	1.27765e-12
LINC00471	PTCD2	0.684934	1.27933e-12
RP11-452L6.1	DET1	0.684828	1.29357e-12
RP11-347C12.10	TBC1D10B	0.684825	1.29399e-12
RP11-977G19.12	PTCD2	0.684824	1.29401e-12
LUCAT1	ECE1	0.684654	1.31725e-12
CTD-2245F17.3	ZNF470	0.684585	1.32685e-12
BDNF-AS	HDHD2	0.684548	1.33196e-12
RP11-359G22.2	SMARCAL1	0.684304	1.36635e-12
RP11-379F4.4	CCDC91	0.68429	1.36833e-12
RP5-1180C10.2	BET1	0.684212	1.37948e-12
AP001625.6	PDGFA	0.68394	1.41921e-12
RAD51-AS1	CTBP1	0.683643	1.46375e-12
AC006378.2	CEP41	0.683587	1.47223e-12
CKMT2-AS1	HDHD2	0.683558	1.47672e-12
RP11-196G11.2	CIITA	0.68355	1.47797e-12
AC009948.5	FMO5	0.683236	1.52704e-12
OSER1-AS1	LHX4	0.6832	1.53266e-12
OSER1-AS1	PTCD2	0.683129	1.54408e-12
RP11-960L18.1	LHX4	0.683052	1.55655e-12
AC074289.1	THBS4	0.682951	1.57295e-12
RP11-305E17.6	C10orf95	0.682925	1.57708e-12
CTD-2530H12.2	PYGL	0.682446	1.65735e-12
CCDC183-AS1	RAD50	0.682281	1.68597e-12
CTD-2245F17.3	GEMIN7	0.682135	1.71164e-12
SEC24B-AS1	TMLHE	0.682057	1.72545e-12
RP11-666A8.8	NDUFAF6	0.681869	1.75943e-12
AC009473.1	CARD8	0.681779	1.77574e-12
LINC00959	CEP41	0.681771	1.77724e-12
RP11-452L6.1	CTBP1	0.681735	1.78398e-12
USP46-AS1	SMARCAL1	0.681635	1.80241e-12
AP001189.4	EGR3	0.681607	1.80769e-12
RP11-932O9.7	TMLHE	0.6816	1.80906e-12
AC007228.11	ZNF573	0.681592	1.81055e-12
CTD-2541M15.1	SMUG1	0.681574	1.81379e-12
RP5-1180C10.2	ARMC10	0.681548	1.81871e-12
RP11-701H24.3	ZNF709	0.681514	1.8251e-12
RP11-1151B14.4	GNAT1	0.68146	1.8353e-12
MCM3AP-AS1	CDKL1	0.681444	1.83842e-12
RP11-18I14.10	NDUFAF6	0.681216	1.882e-12
RP11-682N22.1	SMARCAL1	0.681156	1.89372e-12
CTD-2561B21.10	OBFC1	0.68112	1.90086e-12
USP46-AS1	DET1	0.680719	1.98091e-12
AC009501.4	GEMIN8	0.680528	2.02022e-12
CTD-2541M15.1	CEP41	0.680428	2.04108e-12
INTS6-AS1	GEMIN7	0.680275	2.07332e-12
SRRM2-AS1	ZNF862	0.680273	2.07379e-12
RP3-414A15.2	SMARCAL1	0.680266	2.07535e-12
SOCS2-AS1	SOCS2	0.680104	2.11005e-12
ZNF205-AS1	ZNF862	0.680042	2.12358e-12
INTS6-AS1	DET1	0.679909	2.1527e-12
RP5-888M10.2	ZNF846	0.679772	2.18313e-12
RP11-186F10.2	RP11-1055B8.7	0.679765	2.18477e-12
RBFADN	DCP1B	0.679741	2.19012e-12
RP5-1086K13.1	HDHD2	0.679624	2.21657e-12
RP11-229P13.20	ZNF248	0.679349	2.27989e-12
RP11-473M20.14	ZNF248	0.679211	2.31236e-12
INTS6-AS1	CCDC91	0.678976	2.36858e-12
RP11-18I14.10	CCDC91	0.678935	2.37841e-12
IQCH-AS1	BLNK	0.678796	2.41247e-12
RP11-333E1.1	DET1	0.6787	2.43615e-12
RP11-122G18.5	SMARCAL1	0.678671	2.44336e-12
LINC00959	TAF6	0.678545	2.47515e-12
MCM3AP-AS1	CARD8	0.678513	2.48302e-12
RP11-333E1.1	ZNF862	0.678142	2.57873e-12
ZNRD1-AS1	HEXDC	0.678091	2.59212e-12
RP11-459E5.1	ALPK2	0.67807	2.59781e-12
RP11-425I13.3	SMUG1	0.678065	2.59902e-12
UGDH-AS1	CCDC91	0.67795	2.62968e-12
CTD-2005H7.2	ME3	0.677849	2.65678e-12
RP1-92O14.6	MED8	0.677817	2.66553e-12
CTD-2541M15.1	CCDC91	0.677802	2.66953e-12
RP11-452L6.1	ZNF248	0.677751	2.68345e-12
RBFADN	IPO9	0.677676	2.70403e-12
AC098820.3	CIITA	0.677553	2.73818e-12
RP11-967K21.1	ZNF573	0.677512	2.7495e-12
CTD-2006C1.12	ZNF862	0.67693	2.91664e-12
CTD-2555O16.1	TMLHE	0.676758	2.96807e-12
RP11-308D16.4	TRMT2B	0.676738	2.97416e-12
RP11-379F4.4	ZNF607	0.676682	2.99103e-12
RP11-575L7.4	KIAA1841	0.676428	3.06886e-12
RP3-329E20.2	PYGL	0.676299	3.10918e-12
ZNRD1-AS1	PTGR2	0.676296	3.10997e-12
AD000090.2	CAPS	0.676243	3.12685e-12
RP11-333E1.1	TMEM106A	0.676195	3.14194e-12
RP11-267N12.3	ZNF573	0.676162	3.15256e-12
ZNF205-AS1	GEMIN7	0.676135	3.16125e-12
RP5-1086K13.1	SMUG1	0.676126	3.16417e-12
RP11-162G10.5	PTCD2	0.676107	3.16995e-12
AP001056.1	C21orf33	0.676072	3.18123e-12
RP3-467K16.4	SIGLEC14	0.676	3.2045e-12
RP11-876N24.4	TTYH1	0.675925	3.22876e-12
RP11-35J23.1	CDKL1	0.675834	3.25858e-12
ZNRD1-AS1	SMUG1	0.6757	3.30317e-12
TRAPPC12-AS1	ZNF248	0.675394	3.40655e-12
RP11-477N3.1	GEMIN7	0.675032	3.53309e-12
CTD-2555O16.1	GEMIN7	0.675	3.5444e-12
RP11-619A14.2	SERINC1	0.674733	3.64067e-12
RP3-414A15.2	HDHD2	0.674599	3.69012e-12
RP11-575L7.4	DBNL	0.674523	3.71858e-12
AC006378.2	CRELD1	0.674397	3.76591e-12
AC005775.2	DET1	0.67439	3.76848e-12
OSER1-AS1	CCDC53	0.674377	3.77326e-12
RP11-672A2.4	EGR3	0.674328	3.79212e-12
RBFADN	GPR89B	0.67405	3.8992e-12
CKMT2-AS1	CNPY2	0.673951	3.93817e-12
RP11-10K16.1	C10orf95	0.673915	3.95217e-12
RP11-308D16.4	INTS3	0.673802	3.99714e-12
RP11-876N24.4	FITM2	0.673791	4.00186e-12
CTD-2006C1.12	ANAPC7	0.673667	4.05177e-12
RP11-967K21.1	CCDC91	0.673638	4.06361e-12
IQCH-AS1	SMUG1	0.673369	4.1743e-12
CKMT2-AS1	TAF6	0.673294	4.20564e-12
RP11-576N17.5	TMEM106A	0.672945	4.35469e-12
RP5-886K2.3	CIITA	0.672919	4.36627e-12
PPP1R26-AS1	ETNK2	0.672781	4.42655e-12
RP11-308D16.4	LHX4	0.672747	4.44165e-12
RP11-308D16.4	HDHD2	0.672716	4.45558e-12
XXbac-B135H6.15	ABCC3	0.672408	4.59448e-12
ZNRD1-AS1	TRMT2B	0.67237	4.61196e-12
IQCH-AS1	ZNF248	0.67222	4.681e-12
DICER1-AS1	CEP41	0.672201	4.68991e-12
RP5-1180C10.2	CAPS	0.672124	4.7261e-12
RP11-532F12.5	TTYH1	0.672072	4.75039e-12
RP11-692D12.1	TMLHE	0.672003	4.78339e-12
CTD-2541M15.1	CARD8	0.671974	4.79693e-12
RP11-389O22.1	TMCO1	0.671745	4.90735e-12
FAM222A-AS1	HS3ST3B1	0.671701	4.92901e-12
RP11-967K21.1	CARD8	0.671655	4.95158e-12
DICER1-AS1	DET1	0.671633	4.96229e-12
AC009501.4	BLNK	0.671611	4.97317e-12
RP11-473M20.14	PTCD2	0.671377	5.09024e-12
DICER1-AS1	TMLHE	0.671325	5.1164e-12
SLC38A3	HS3ST3B1	0.671306	5.12617e-12
RBFADN	PTCD2	0.670866	5.35466e-12
AC091729.9	PTGR2	0.67086	5.3575e-12
AC008746.3	LHX4	0.670727	5.42862e-12
RAD51-AS1	ZNF862	0.670712	5.43663e-12
AD000090.2	ZNF862	0.670643	5.47412e-12
RP5-1086K13.1	CCDC53	0.670618	5.48765e-12
RP11-15E18.1	CIITA	0.670588	5.50369e-12
CKMT2-AS1	CEP41	0.670566	5.51614e-12
RP11-35G9.3	CCDC53	0.670431	5.58978e-12
RP11-418J17.1	CCDC53	0.670408	5.60271e-12
RP11-247L20.3	CDKL1	0.670291	5.66792e-12
DICER1-AS1	ZNF846	0.670224	5.70564e-12
RP11-619A14.2	PDCD1	0.67015	5.74744e-12
RP11-428J1.5	SCCPDH	0.670091	5.78076e-12
RP11-428J1.5	IPO9	0.670067	5.7949e-12
RP3-414A15.2	ZNF248	0.670019	5.82236e-12
RP11-428J1.5	CD58	0.669883	5.90057e-12
MCM3AP-AS1	PTCD2	0.66987	5.90848e-12
RP11-15E18.1	NAPSA	0.669838	5.92702e-12
RP11-418J17.1	RAD50	0.669721	5.99568e-12
CTC-248O19.1	CYFIP2	0.669681	6.01941e-12
RP11-977G19.12	LHX4	0.669629	6.05025e-12
RP11-418J17.1	FAN1	0.669466	6.14837e-12
RP11-619A14.2	PDGFA	0.6693	6.2498e-12
RP3-414A15.2	GEMIN8	0.669296	6.25204e-12
RP11-428J1.5	UGDH	0.669255	6.27736e-12
ZNRD1-AS1	CDKL1	0.66925	6.28055e-12
RP11-54A4.2	ECE1	0.669239	6.28708e-12
CTD-2619J13.14	NDUFAF6	0.669216	6.30129e-12
RP11-227G15.2	CAPS	0.669162	6.33502e-12
DICER1-AS1	LHX4	0.66912	6.36126e-12
RP11-477N3.1	NDUFAF6	0.669003	6.43523e-12
RP11-1105O14.1	CSGALNACT1	0.668875	6.51609e-12
RP11-452L6.1	TTYH1	0.668777	6.57927e-12
AD000090.2	FAN1	0.668695	6.63256e-12
CTD-2541M15.1	CRELD1	0.668636	6.67139e-12
RP5-1180C10.2	ZNF763	0.668574	6.7119e-12
INTS6-AS1	HEXDC	0.668542	6.73268e-12
AC009948.5	BET1	0.66854	6.734e-12
AC007551.3	CDKL1	0.668478	6.77542e-12
RAD51-AS1	C10orf95	0.668449	6.79463e-12
RP11-960L18.1	CCDC91	0.668321	6.8808e-12
INTS6-AS1	CCDC53	0.668198	6.96367e-12
RBFADN	TRNAU1AP	0.668116	7.02023e-12
RP11-35G9.3	CDKL1	0.667975	7.11761e-12
RP11-568J23.5	EMC8	0.667958	7.12931e-12
RP11-848P1.3	C21orf67	0.667942	7.14074e-12
RP11-752G15.8	LHX4	0.667936	7.14471e-12
RP11-196G11.2	CAPS	0.66782	7.22687e-12
BDNF-AS	ZNF248	0.667792	7.24627e-12
RP11-35G9.3	ARMC10	0.667741	7.28274e-12
RP11-576N17.5	SMARCAL1	0.667621	7.36849e-12
AC093627.12	CD300LD	0.667595	7.38739e-12
AC007228.11	CDKL1	0.667573	7.40359e-12
IQCH-AS1	PTCD2	0.667566	7.40809e-12
RP11-523O18.5	ANAPC7	0.667525	7.43798e-12
RP11-428J1.5	LHX4	0.667481	7.46995e-12
RP11-885B4.2	TMEM106A	0.667342	7.5725e-12
RP5-1180C10.2	TMEM180	0.667207	7.67305e-12
RP11-466F5.8	PTCD2	0.667141	7.72272e-12
TMEM44-AS1	CCDC53	0.666962	7.85854e-12
RP11-18I14.10	ACYP2	0.66693	7.88269e-12
RP11-16E12.2	CDKL1	0.666863	7.9343e-12
RP11-806H10.4	PGS1	0.666789	7.99194e-12
RP5-886K2.3	CCDC91	0.66674	8.02997e-12
RP3-467K16.4	DGAT2	0.666532	8.19445e-12
ZBED3-AS1	FMO5	0.666428	8.27784e-12
ZBED3-AS1	LHX4	0.666327	8.35975e-12
RP11-218L14.4	TMLHE	0.66632	8.36525e-12
RP11-90L20.2	NAV1	0.666218	8.44926e-12
PRSS51	CD84	0.6662	8.46348e-12
RP5-1086K13.1	CIITA	0.666126	8.52517e-12
RP11-63K6.7	ANKRD30B	0.666059	8.581e-12
TMEM44-AS1	SMARCAL1	0.666003	8.62716e-12
RP11-977G19.12	WDR4	0.66594	8.68036e-12
FAM225A	CD300E	0.665932	8.68724e-12
RP11-672A2.4	SLC37A1	0.665908	8.70776e-12
CKMT2-AS1	DCP1B	0.665849	8.75745e-12
ZBED3-AS1	ZNF248	0.665695	8.8896e-12
RP11-295M18.2	ZNF862	0.665546	9.01926e-12
CTC-301O7.4	CD37	0.66541	9.1389e-12
RP11-122G18.5	HDHD2	0.665307	9.23068e-12
RP11-333E1.1	LHX4	0.665301	9.23556e-12
BDNF-AS	PTCD2	0.6653	9.23696e-12
AC003682.16	LHX4	0.665248	9.28343e-12
RP11-977G19.12	ZNF573	0.665182	9.34265e-12
INTS6-AS1	C14orf93	0.665153	9.36873e-12
RP11-430C7.4	MDM4	0.665147	9.37412e-12
IQCH-AS1	ZNF862	0.66514	9.38125e-12
AC007551.3	GEMIN8	0.665028	9.48276e-12
RP11-18I14.10	ZNF862	0.664918	9.58487e-12
RP11-523O18.5	FMO5	0.664904	9.59804e-12
UGDH-AS1	SLAMF6	0.664773	9.72054e-12
USP46-AS1	NAPSA	0.664751	9.7408e-12
RP11-379F4.4	BET1	0.664591	9.89284e-12
AD000090.2	CIITA	0.664476	1.00033e-11
INTS6-AS1	ZNF846	0.664418	1.00589e-11
RAD51-AS1	NDUFAF6	0.664362	1.01139e-11
CTD-2201I18.1	KANK1	0.664327	1.01483e-11
RP11-355N15.1	ZNF594	0.664315	1.01596e-11
RAD51-AS1	FITM2	0.664281	1.01936e-11
RP13-228J13.1	C14orf93	0.664236	1.02373e-11
CCND2-AS1	MADCAM1	0.664218	1.02552e-11
ZBED3-AS1	SMUG1	0.664213	1.02603e-11
RP11-967K21.1	ZNF862	0.664128	1.03452e-11
RP11-473M20.14	SMARCAL1	0.664125	1.03483e-11
RAD51-AS1	PRCD	0.664117	1.03561e-11
RP11-162G10.5	SMARCAL1	0.66396	1.05139e-11
RP11-477N3.1	ZNF846	0.663801	1.06759e-11
RP11-333E1.1	ZNF248	0.663764	1.07143e-11
RP11-171I2.1	TTN	0.663633	1.08502e-11
AC098820.3	C14orf93	0.66356	1.09273e-11
AC007228.11	ZNF470	0.663467	1.10254e-11
RP11-318M2.2	FZD6	0.663301	1.12031e-11
RP11-689B22.2	CIITA	0.663016	1.15139e-11
LINC00959	ZNF248	0.66294	1.15985e-11
RP3-414A15.2	FITM2	0.662868	1.16792e-11
AC007551.3	FITM2	0.66285	1.16995e-11
ALG13-AS1	CDKL1	0.662726	1.18395e-11
RP11-685M7.3	GEMIN8	0.66267	1.19028e-11
CTD-2245F17.3	ZNF846	0.662627	1.19521e-11
LINC00959	PTCD2	0.662577	1.20094e-11
RP11-575L7.2	IGFL4	0.662525	1.20696e-11
MCM3AP-AS1	KIAA1841	0.662492	1.21082e-11
CTD-2619J13.3	FMO5	0.662455	1.21507e-11
RP11-452L6.1	ZNF573	0.662411	1.2202e-11
RP11-333E1.1	CDKL1	0.662317	1.23131e-11
MCM3AP-AS1	TMLHE	0.662306	1.23257e-11
TOB1-AS1	ZNF862	0.6623	1.23328e-11
RP5-886K2.3	CCDC53	0.662223	1.2424e-11
AC004840.9	C10orf95	0.662045	1.26382e-11
AC068039.4	CCDC91	0.662044	1.26394e-11
RP11-18I14.10	CEP41	0.662017	1.26711e-11
INTS6-AS1	CARD8	0.662008	1.26826e-11
AC009948.5	C10orf95	0.661945	1.27598e-11
CKMT2-AS1	METTL4	0.661883	1.2835e-11
CTD-2619J13.3	C10orf95	0.661701	1.30606e-11
LINC00959	ZNF573	0.66169	1.30746e-11
RP5-1086K13.1	LHX4	0.661677	1.309e-11
RP11-425I13.3	ZNF862	0.661631	1.31486e-11
RP11-418J17.1	PTCD2	0.661611	1.31729e-11
LINC00959	CIITA	0.661584	1.3208e-11
RP11-18I14.10	TMEM106A	0.661452	1.3375e-11
RP3-329E20.2	CD300LD	0.661447	1.33819e-11
LINC00959	RHBDD1	0.661429	1.34045e-11
RP11-10K16.1	TMEM106A	0.661368	1.34828e-11
RP11-196G11.2	ZNF862	0.661363	1.34895e-11
AP001189.4	FGF2	0.661341	1.3518e-11
RP11-554I8.1	NMUR1	0.661175	1.37332e-11
RP11-54O7.18	GAL3ST2	0.661105	1.38259e-11
RP11-295M18.2	MADCAM1	0.661087	1.38486e-11
TMCC1-AS1	MADCAM1	0.660985	1.39847e-11
UGDH-AS1	ZNF248	0.660955	1.40245e-11
RP11-122G18.5	GPR89B	0.660899	1.40992e-11
RP11-619A14.2	GAL3ST2	0.660826	1.41986e-11
RP11-162G10.5	LHX4	0.660785	1.42534e-11
RP11-328D5.1	FMO5	0.660738	1.43179e-11
ZBED3-AS1	ANAPC7	0.660691	1.43819e-11
CTB-179K24.3	CIITA	0.660625	1.44728e-11
RP11-379F4.4	NAPSA	0.660576	1.45409e-11
RP5-888M10.2	SMARCAL1	0.660455	1.47082e-11
RP11-576N17.5	ZNF846	0.660449	1.47176e-11
AC012358.7	GEMIN8	0.660442	1.47275e-11
AP001625.6	PDCD1	0.660365	1.48345e-11
UGDH-AS1	HDHD2	0.660168	1.51151e-11
LINC00959	BET1	0.660167	1.51177e-11
AC012309.5	CDKL1	0.660113	1.51946e-11
RP5-888M10.2	C14orf93	0.660102	1.52111e-11
INTS6-AS1	HDHD2	0.659926	1.54669e-11
MCM3AP-AS1	TRMT2B	0.659882	1.55318e-11
INTS6-AS1	SMARCAL1	0.659804	1.56467e-11
RP11-425I13.3	HEXDC	0.659764	1.5707e-11
LENG8-AS1	CTBP1	0.659725	1.57652e-11
UGDH-AS1	C10orf95	0.659626	1.59132e-11
RP11-35G9.3	LHX4	0.659611	1.59372e-11
RP11-186F10.2	CD84	0.659556	1.60197e-11
CTD-2006C1.12	C10orf95	0.659475	1.61433e-11
RP11-305E17.6	DBNL	0.659378	1.62931e-11
AC098820.3	ZNF248	0.659356	1.63263e-11
AC012358.7	MCM3AP	0.659219	1.65392e-11
RP4-655J12.4	DET1	0.659213	1.65498e-11
IQCH-AS1	CCDC91	0.659193	1.65808e-11
RP11-452L6.1	FITM2	0.659182	1.65982e-11
CTD-2555O16.1	CD37	0.659004	1.68802e-11
LENG8-AS1	C10orf95	0.658985	1.69097e-11
MRPL23-AS1	RP11-1055B8.7	0.658979	1.69193e-11
CTD-2541M15.1	ARMC10	0.658911	1.70295e-11
RP5-1180C10.2	METTL4	0.658701	1.73713e-11
TOB1-AS1	NAPSA	0.658528	1.7656e-11
ZNF205-AS1	CDKL1	0.658516	1.76769e-11
CCDC183-AS1	CTBP1	0.65846	1.77698e-11
CTD-2245F17.3	MCM3AP	0.658359	1.79409e-11
RP11-707G14.7	ZNF248	0.658226	1.81673e-11
RP5-1180C10.2	DBNL	0.658184	1.82391e-11
RP11-473M20.14	CIITA	0.658153	1.82927e-11
RP11-10K16.1	TMLHE	0.657939	1.86653e-11
RP11-18I14.10	CIITA	0.657914	1.87099e-11
RP4-655J12.4	CCDC180	0.657827	1.88632e-11
UGDH-AS1	ZNF846	0.657813	1.88892e-11
RP11-960L18.1	PLCG2	0.657705	1.90818e-11
ALG13-AS1	ZNF862	0.6577	1.90908e-11
RP11-16E12.2	ZNF763	0.657619	1.92365e-11
CTD-2006K23.1	LGALS9B	0.657587	1.92951e-11
STAG3L5P-PVRIG2P-PILRB	CARD8	0.657579	1.931e-11
OSER1-AS1	CEP41	0.657573	1.93214e-11
RP11-218L14.4	MCM3AP	0.657562	1.93398e-11
BDNF-AS	C10orf95	0.657485	1.94818e-11
CTD-2541M15.1	FMO5	0.657337	1.97542e-11
LENG8-AS1	ZNF594	0.657201	2.00076e-11
RP11-473M20.14	CCDC53	0.657196	2.00172e-11
AC017116.11	ARHGEF18	0.657112	2.01761e-11
RP11-379F4.4	DCP1B	0.657098	2.02035e-11
UGDH-AS1	DET1	0.657095	2.02086e-11
CTD-2528L19.6	LHX4	0.657032	2.0329e-11
RP11-229P13.20	ZNF763	0.656864	2.06513e-11
RP11-305E17.6	CCDC53	0.65678	2.08162e-11
RP11-575L7.2	CARD8	0.656736	2.09017e-11
RP11-15E18.1	DET1	0.656679	2.10138e-11
RP11-186F10.2	PRSS27	0.656676	2.10198e-11
AC009501.4	ZNF862	0.656645	2.10816e-11
ZNRD1-AS1	GEMIN7	0.656453	2.14636e-11
AC098820.3	ZNF607	0.656453	2.14643e-11
AC009501.4	HDHD2	0.656377	2.16164e-11
RP11-977G19.12	DCP1B	0.656279	2.18162e-11
RP11-806H10.4	FAM20A	0.656234	2.19085e-11
RP11-379F4.4	TMEM106A	0.656148	2.20852e-11
LINC00959	TMLHE	0.65606	2.22677e-11
TMLHE-AS1	ZNF573	0.655953	2.2493e-11
CTD-2223O18.1	TTYH1	0.655945	2.251e-11
RP1-93H18.1	ZNF846	0.655903	2.25985e-11
AP001056.1	NAPSA	0.655891	2.26234e-11
RP11-977G19.12	GPR89B	0.655862	2.26848e-11
IQCH-AS1	GEMIN8	0.655817	2.27802e-11
AC007551.3	PTCD2	0.655757	2.29091e-11
AC104532.4	LHX4	0.655736	2.2954e-11
LINC00959	MADCAM1	0.655699	2.30333e-11
RP11-932O9.7	ZFHX2	0.655642	2.31552e-11
UGDH-AS1	C2orf74	0.655507	2.34496e-11
RP5-1180C10.2	RHBDD1	0.654996	2.4595e-11
AC104532.4	CIITA	0.654967	2.46622e-11
RP11-960L18.1	GLCCI1	0.654819	2.50035e-11
TMEM44-AS1	ZNF862	0.654786	2.5082e-11
RP11-707G14.7	CARD8	0.654763	2.51359e-11
RP11-379F4.4	MADCAM1	0.654732	2.52079e-11
CTD-2006C1.12	GEMIN8	0.654688	2.53108e-11
DICER1-AS1	PTGR2	0.654545	2.56498e-11
RP4-655J12.4	MADCAM1	0.654305	2.62301e-11
RP11-333E1.1	PTCD2	0.65413	2.66597e-11
RP11-473M20.14	ZNF213	0.654113	2.67023e-11
CTD-2619J13.14	LHX4	0.654024	2.69227e-11
CCDC183-AS1	TAF6	0.653983	2.70268e-11
OSER1-AS1	CNPY2	0.653971	2.70569e-11
RP11-49K24.4	FAN1	0.653777	2.75468e-11
AC093627.12	FAM20A	0.653762	2.75853e-11
LINC00959	CRELD1	0.653562	2.81031e-11
RP13-228J13.1	NAPSA	0.653457	2.8378e-11
RP11-834C11.3	ZNF248	0.653431	2.84455e-11
AC003682.16	FAN1	0.65342	2.84744e-11
RP11-540B6.6	TTYH1	0.653372	2.86026e-11
RP11-308D16.4	SMARCAL1	0.653241	2.89526e-11
LINC00954	ZFHX2	0.653119	2.92803e-11
RP11-428J1.5	ZNF573	0.652978	2.96661e-11
AC068039.4	FAN1	0.652953	2.97347e-11
RP13-228J13.1	ZNF573	0.652931	2.9795e-11
AC007551.3	KIAA1841	0.65292	2.98237e-11
CTD-2245F17.3	TMEM106A	0.652857	2.99986e-11
RP11-572M11.3	CTBP1	0.652805	3.01421e-11
RP11-350J20.5	FAM20A	0.652724	3.03712e-11
ZNRD1-AS1	CEP41	0.652665	3.05366e-11
UGDH-AS1	ZNF607	0.65257	3.08055e-11
RP11-35G9.3	NAPSA	0.652565	3.08204e-11
RP11-18F14.1	GNAT1	0.652504	3.09939e-11
AC098820.3	KIAA1841	0.652449	3.11508e-11
RP11-266L9.5	STX16	0.652444	3.1165e-11
RP11-418J17.1	MADCAM1	0.652387	3.13314e-11
TMEM44-AS1	CTBP1	0.652287	3.162e-11
RP11-267N12.3	GEMIN8	0.652236	3.17707e-11
RP1-37C10.3	ATP13A2	0.652216	3.18285e-11
FAM225B	TRPV4	0.652185	3.19195e-11
MCM3AP-AS1	CIITA	0.652142	3.20456e-11
CTD-2245F17.3	PTGR2	0.652086	3.22109e-11
RP11-528G1.2	FMO5	0.652013	3.24301e-11
RP11-122G18.5	FAN1	0.651917	3.27196e-11
RP11-473M20.14	SMUG1	0.651854	3.29082e-11
RP11-418J17.1	CIITA	0.651819	3.30148e-11
RP11-473M20.14	TMEM106A	0.651662	3.34945e-11
RP5-888M10.2	CDKL1	0.651622	3.36196e-11
RAD51-AS1	CARD8	0.651531	3.39024e-11
RBFADN	CNPY2	0.65146	3.41229e-11
CTD-2006C1.12	FITM2	0.651408	3.42863e-11
CTD-2561B21.10	C10orf95	0.651312	3.45915e-11
RP11-672A2.4	ALPK2	0.651146	3.51232e-11
MRPL23-AS1	CTBP1	0.651133	3.51662e-11
RP11-418J17.1	NAPSA	0.651111	3.52368e-11
RP11-18F14.1	BAIAP2	0.651097	3.5282e-11
TMCC1-AS1	CIITA	0.651044	3.54531e-11
RP11-967K21.1	C10orf95	0.651038	3.54728e-11
AC017076.5	TYMP	0.651004	3.55853e-11
ZNF582-AS1	TRMT2B	0.650991	3.56264e-11
AC007551.3	LHX4	0.650981	3.56586e-11
RP11-428J1.5	METTL4	0.650961	3.57243e-11
RP11-575L7.2	KIAA1841	0.65095	3.57608e-11
RP11-418J17.1	RHBDD1	0.650908	3.58998e-11
ZNRD1-AS1	CIITA	0.650879	3.59947e-11
RAD51-AS1	MADCAM1	0.650846	3.61057e-11
RP11-466F5.8	LHX4	0.650844	3.61114e-11
RP11-477N3.1	TMLHE	0.650788	3.62965e-11
LA16c-390H2.4	DSCR3	0.650566	3.70433e-11
RP11-35G9.3	DBNL	0.650508	3.72405e-11
APCDD1L-AS1	NDUFV1	0.6505	3.72677e-11
RP11-418J17.1	BLNK	0.650495	3.72848e-11
RP11-452L6.1	C10orf95	0.650488	3.73101e-11
RP5-888M10.2	PKNOX1	0.650416	3.75583e-11
OSER1-AS1	DET1	0.650406	3.7593e-11
AC098820.3	TMLHE	0.650393	3.76352e-11
RP5-888M10.2	DET1	0.650192	3.83373e-11
ZBED3-AS1	BLNK	0.650156	3.84624e-11
RP11-18I14.10	CARD8	0.650129	3.85562e-11
RP1-37C10.3	MFAP2	0.650091	3.86936e-11
CTD-2528L19.6	SMARCAL1	0.649886	3.94253e-11
RP11-118B18.1	SIGLEC14	0.649846	3.95698e-11
CCDC183-AS1	RHBDD1	0.6497	4.01001e-11
RP11-333E1.1	KIAA1841	0.649678	4.01822e-11
AD000090.2	CEP41	0.649561	4.0614e-11
AC004840.9	ZNF573	0.649542	4.06829e-11
AC009501.4	RAD50	0.649469	4.09544e-11
RP11-10K16.1	CRELD1	0.649421	4.11353e-11
RP11-267N12.3	DBNL	0.649402	4.12086e-11
IQCH-AS1	ANAPC7	0.649338	4.14493e-11
RP11-430C7.4	LRRN2	0.649084	4.24205e-11
RP3-414A15.2	TMEM106A	0.649035	4.26092e-11
AC009948.5	HDHD2	0.649016	4.26857e-11
RP11-473M20.11	STX16	0.649	4.27452e-11
RP11-305E17.6	CCDC91	0.64894	4.29821e-11
BDNF-AS	LHX4	0.648908	4.31063e-11
RP11-383C5.5	NAV1	0.648868	4.32649e-11
RP11-35G9.3	DCP1B	0.648737	4.37839e-11
RP11-122G18.5	BLNK	0.648721	4.38485e-11
RP11-305E17.6	ARMC10	0.6487	4.39327e-11
RP11-170N16.3	NUDT6	0.648617	4.42651e-11
RP11-389O22.1	PTCD2	0.648414	4.50888e-11
RP11-267N12.3	RAD50	0.648379	4.52331e-11
AC009948.5	FAN1	0.648368	4.52769e-11
RP11-692D12.1	CDKL1	0.648366	4.52875e-11
AC098820.3	DET1	0.648362	4.53039e-11
CTD-2006C1.12	CTBP1	0.648353	4.53415e-11
RP11-576N17.5	GEMIN8	0.648306	4.55354e-11
RP11-523O18.5	DET1	0.648243	4.57955e-11
AC012309.5	ZNF573	0.648175	4.60799e-11
PPP1R26-AS1	SOX13	0.648143	4.62142e-11
CTD-2245F17.3	LHX4	0.648129	4.62741e-11
RP11-960L18.1	CDKL1	0.648109	4.63561e-11
RP11-165F24.3	DBNL	0.648099	4.63988e-11
RP11-122G18.5	IPO9	0.648055	4.65859e-11
TMEM44-AS1	CIITA	0.647976	4.69191e-11
RP11-10K16.1	MADCAM1	0.647966	4.69655e-11
AC007228.11	TMEM106A	0.647926	4.71338e-11
STAG3L5P-PVRIG2P-PILRB	ZNF248	0.647888	4.72993e-11
LENG8-AS1	KIAA1841	0.647884	4.73138e-11
AC098820.3	PTCD2	0.647828	4.75536e-11
RP11-428J1.5	PDIA6	0.647824	4.75724e-11
RP11-418J17.1	MPND	0.647821	4.75842e-11
CTB-179K24.3	LHX4	0.647792	4.77124e-11
RP11-1079K10.3	TMEM106A	0.64777	4.78046e-11
AC104532.4	DBT	0.647759	4.78559e-11
RP13-228J13.1	TRMT2B	0.647756	4.78688e-11
RP11-308D16.4	GEMIN7	0.647716	4.80404e-11
TMCC1-AS1	RAD50	0.647631	4.84131e-11
ZNF205-AS1	ZNF470	0.647583	4.86233e-11
RP11-967K21.1	TACR1	0.647569	4.86854e-11
LENG8-AS1	NAPSA	0.647565	4.87051e-11
AC093627.12	CD300E	0.647561	4.87211e-11
RP11-576N17.5	TRMT2B	0.647463	4.91571e-11
RP11-308D16.4	ZNF248	0.647427	4.93162e-11
OSER1-AS1	BET1	0.647391	4.94762e-11
RP1-93H18.1	KIAA1841	0.647346	4.96805e-11
RP11-967K21.1	FMO5	0.647297	4.99036e-11
CTD-2619J13.14	KIAA1841	0.647236	5.01771e-11
RP11-532F12.5	NDUFV1	0.647043	5.10617e-11
RP11-701H24.3	C14orf93	0.646977	5.13689e-11
RP5-1180C10.2	ZNF846	0.646959	5.14505e-11
RP5-888M10.2	HDHD2	0.646823	5.209e-11
RP11-428J1.5	WDR4	0.646746	5.24535e-11
RP1-249H1.4	SIGLEC14	0.646714	5.26049e-11
RP11-433J8.1	COL25A1	0.646632	5.29951e-11
AC008746.3	FAN1	0.646507	5.35957e-11
AC114730.3	GAL3ST2	0.646444	5.39059e-11
ZNRD1-AS1	GEMIN8	0.646435	5.39488e-11
RP11-359G22.2	PTCD2	0.646433	5.39561e-11
RP11-118B18.1	HAS1	0.646405	5.4092e-11
RP11-18I14.10	BLNK	0.6464	5.41165e-11
AC091729.9	PRCD	0.646378	5.42281e-11
RP13-228J13.1	TMEM106A	0.646194	5.51364e-11
ZNF205-AS1	PTGR2	0.646107	5.55707e-11
RP11-373N22.3	FMO5	0.646032	5.59431e-11
RP11-229P13.20	ZNF846	0.646001	5.61028e-11
ZBED3-AS1	MPND	0.645887	5.66815e-11
AC098820.3	LHX4	0.645783	5.72159e-11
RP11-707G14.7	DET1	0.645706	5.76138e-11
USP46-AS1	ZNF862	0.645661	5.78448e-11
UGDH-AS1	ZNF862	0.64561	5.81155e-11
CTD-2245F17.3	ZNF862	0.645545	5.84534e-11
RP11-295M18.2	CD34	0.645399	5.92273e-11
RP11-267N12.3	CNPY2	0.645398	5.92332e-11
CCDC183-AS1	DET1	0.645362	5.94232e-11
RP11-528G1.2	MGAT5B	0.645334	5.95726e-11
AC098820.3	INTS3	0.645329	5.96041e-11
RP3-414A15.2	NAPSA	0.645251	6.00235e-11
RP11-575L7.4	MCM3AP	0.645216	6.02127e-11
RP11-359G22.2	BET1	0.645179	6.04095e-11
AC009501.4	KIAA1841	0.645102	6.08327e-11
RP11-162G10.5	CCDC180	0.645008	6.13461e-11
CTC-301O7.4	TMLHE	0.644915	6.186e-11
RP11-466F5.8	HDHD2	0.644863	6.21521e-11
CKMT2-AS1	ZNF862	0.644807	6.24634e-11
ZBED3-AS1	TTYH1	0.644768	6.26841e-11
RP11-229P13.20	PRCD	0.644739	6.28442e-11
RP11-473M20.14	CEP41	0.64472	6.29516e-11
UGDH-AS1	TAF6	0.644685	6.31518e-11
RP11-575L7.2	CIITA	0.644632	6.34528e-11
RP11-967K21.1	PTCD2	0.644632	6.34544e-11
RP5-886K2.3	HDHD2	0.644614	6.35527e-11
ZNF582-AS1	INTS3	0.644557	6.38822e-11
RP11-122G18.5	ZNF763	0.644554	6.38958e-11
RP11-477N3.1	KIAA1841	0.644517	6.41078e-11
AC008746.3	CARD8	0.644374	6.49372e-11
AC017116.11	SEMA4B	0.644369	6.49663e-11
ZNRD1-AS1	DET1	0.644341	6.51286e-11
TMCC1-AS1	BET1	0.644231	6.57734e-11
RP5-1180C10.2	TTYH1	0.64416	6.61939e-11
RP11-568J23.5	ANKRD12	0.644116	6.64576e-11
RP11-379F4.4	ZNF763	0.644044	6.68879e-11
RP11-685M7.3	CARD8	0.644039	6.69144e-11
RP11-35G9.3	RHBDD1	0.643974	6.73035e-11
SRRM2-AS1	CIITA	0.643869	6.79428e-11
RP11-379F4.4	CCDC53	0.643802	6.8352e-11
RP11-35G9.3	ZNF607	0.643801	6.8356e-11
RP11-932O9.7	CARD8	0.643553	6.98907e-11
AC006378.2	CARD8	0.643509	7.01629e-11
FAM225B	CD300E	0.643508	7.01682e-11
RP11-528G1.2	CD34	0.643455	7.05003e-11
RP11-79N23.1	CIITA	0.643438	7.0608e-11
RP11-960L18.1	GEMIN7	0.643435	7.06303e-11
RP11-35J23.1	TMEM106A	0.643409	7.07923e-11
ZNF582-AS1	ZNF862	0.643327	7.13135e-11
AC104532.4	CAPS	0.643312	7.14084e-11
BDNF-AS	RAD50	0.643257	7.17614e-11
RP11-87C12.5	FMO5	0.643185	7.22242e-11
RP11-15E18.1	LHX4	0.643126	7.26059e-11
CTD-2541M15.1	RAD50	0.643117	7.266e-11
RP11-576N17.5	INTS3	0.643018	7.33072e-11
TMEM44-AS1	HDHD2	0.643012	7.33421e-11
DICER1-AS1	GEMIN7	0.642914	7.39877e-11
ZNRD1-AS1	INTS3	0.642827	7.45634e-11
USP46-AS1	ARMC10	0.642818	7.46255e-11
RP11-122G18.5	INTS3	0.642731	7.52073e-11
LINC00910	ZNF862	0.642723	7.52572e-11
ZNRD1-AS1	HDHD2	0.642594	7.61259e-11
AC009948.5	ARMC10	0.642586	7.61849e-11
AC009501.4	BET1	0.64258	7.62237e-11
CTD-2528L19.6	DCP1B	0.642458	7.70551e-11
IGF2-AS	IGF2	0.642456	7.70671e-11
RP11-473M20.14	CRELD1	0.642447	7.71311e-11
RP11-23J9.4	ZFHX2	0.642411	7.73761e-11
RP11-572M11.3	MADCAM1	0.642374	7.76343e-11
RAD51-AS1	LHX4	0.642327	7.79611e-11
RP11-350J20.5	UPB1	0.642288	7.82285e-11
RP11-977G19.12	CARD8	0.642192	7.89014e-11
RP11-575L7.4	PLCG2	0.642171	7.90514e-11
CTD-3064H18.4	ZNF677	0.642096	7.95738e-11
ALG13-AS1	GEMIN8	0.64205	7.99024e-11
ZNF582-AS1	TMLHE	0.641942	8.06764e-11
RP3-414A15.2	SMUG1	0.641905	8.09353e-11
CTD-2006C1.12	TAF6	0.641884	8.10914e-11
AC009501.4	ARMC10	0.641871	8.11854e-11
AC020594.5	SLAMF6	0.64177	8.19166e-11
RP11-15E18.1	MADCAM1	0.641708	8.23659e-11
RP11-418J17.1	CEP41	0.641702	8.24097e-11
AD000090.2	RAD50	0.6417	8.24257e-11
CTD-2619J13.3	DET1	0.641688	8.25119e-11
RP11-428J1.5	GLRX3	0.641644	8.28348e-11
TAPT1-AS1	CIITA	0.641617	8.30341e-11
RP5-888M10.2	ZNF470	0.64156	8.34578e-11
RP11-379F4.4	METTL4	0.641532	8.36642e-11
ZNRD1-AS1	FITM2	0.641414	8.45415e-11
RP11-295M18.2	CARD8	0.641388	8.47355e-11
RP11-418J17.1	ZNF862	0.641327	8.51951e-11
INTS6-AS1	KIAA1841	0.641315	8.52886e-11
TRAPPC12-AS1	SPINT1	0.6413	8.54042e-11
RP11-572M11.3	FMO5	0.641279	8.55585e-11
CTD-2541M15.1	MADCAM1	0.641255	8.57458e-11
RP11-308D16.4	CCDC53	0.641248	8.57923e-11
RP11-229P13.20	CCDC53	0.64123	8.59334e-11
RP11-715J22.2	LRRC18	0.641188	8.62517e-11
BDNF-AS	SMARCAL1	0.641166	8.64225e-11
RP11-576N17.5	CARD8	0.641163	8.64413e-11
SRRM2-AS1	ANAPC7	0.641115	8.68091e-11
LENG8-AS1	HEXDC	0.641055	8.72772e-11
RP5-886K2.3	IGFL4	0.641049	8.7322e-11
RP11-122G18.5	H6PD	0.640995	8.77377e-11
RP11-379F4.4	CD58	0.640973	8.79148e-11
RP11-418J17.1	CCDC91	0.640845	8.89142e-11
RP11-651L5.2	MARC1	0.640838	8.89686e-11
IQCH-AS1	ARMC10	0.640735	8.97851e-11
RP11-229P13.20	TMEM106A	0.640596	9.08947e-11
RP11-473M20.14	HEXDC	0.640553	9.1235e-11
CTD-2528L19.6	CD58	0.640518	9.15195e-11
ZBED3-AS1	BET1	0.64047	9.19136e-11
MCM3AP-AS1	ZNF470	0.64039	9.25599e-11
RP11-347C18.3	C10orf95	0.640381	9.26314e-11
RP11-267N12.3	ZNF248	0.640302	9.3281e-11
RP11-452L6.1	PTGR2	0.640284	9.34337e-11
AC098820.3	METTL4	0.640231	9.38725e-11
ZNF582-AS1	ZNF846	0.640203	9.40997e-11
RP11-576N17.5	CIITA	0.640086	9.50811e-11
IQCH-AS1	FITM2	0.640057	9.53213e-11
CCND2-AS2	MADCAM1	0.640053	9.5354e-11
RP5-1180C10.2	GPR89B	0.639944	9.62737e-11
RP11-347C18.3	TP53INP1	0.639885	9.67825e-11
RP11-333E1.1	NUDT7	0.639774	9.77286e-11
ZBED3-AS1	CARD8	0.639729	9.81232e-11
RP11-379F4.4	SLAMF6	0.63969	9.84533e-11
RP11-18I14.10	MADCAM1	0.639617	9.90923e-11
CTD-2530H12.2	UNCX	0.63954	9.97692e-11
RP5-888M10.2	ZNF248	0.639539	9.97725e-11
AP001056.1	C14orf93	0.639487	1.0023e-10
RP5-886K2.3	CRELD1	0.639474	1.00348e-10
SOCS2-AS1	CCDC53	0.639459	1.00478e-10
RP11-528G1.2	TTYH1	0.639348	1.01468e-10
RP11-389O22.1	DCP1B	0.63932	1.01717e-10
PRRT3-AS1	CRELD1	0.639219	1.02628e-10
CTD-2201I18.1	ZNF248	0.639201	1.02783e-10
CTD-2528L19.6	DET1	0.639183	1.02952e-10
INTS6-AS1	STX16	0.639092	1.03779e-10
RP11-267N12.3	TAF6	0.639058	1.0409e-10
CCND2-AS2	ZNF862	0.639009	1.04536e-10
LENG8-AS1	PTCD2	0.638952	1.05067e-10
LINC00959	ARMC10	0.63895	1.05077e-10
RP11-267N12.3	CIITA	0.638949	1.05092e-10
RP11-351I24.1	ADM	0.638771	1.0675e-10
RP11-692D12.1	KIF27	0.638767	1.06783e-10
RP3-414A15.2	CARD8	0.638755	1.06896e-10
CTD-2245F17.3	ALG13	0.638664	1.07752e-10
RP11-1157N2-B.2	CD84	0.638611	1.0826e-10
ZNF205-AS1	ZNF573	0.638525	1.0908e-10
CTD-2006C1.12	CCDC53	0.638492	1.09394e-10
RP11-572M11.3	DET1	0.638488	1.09427e-10
RP11-418J17.1	CTBP1	0.638387	1.10402e-10
FAM225A	TYMP	0.638386	1.10408e-10
RP5-1180C10.2	IPO9	0.638347	1.10791e-10
RP11-267N12.3	BLNK	0.638322	1.11037e-10
LENG8-AS1	BET1	0.638212	1.12107e-10
RP5-1180C10.2	DBT	0.638163	1.12593e-10
CTB-179K24.3	KIAA1841	0.63811	1.13116e-10
RP11-359G22.2	CNPY2	0.637921	1.14999e-10
AC091729.9	ZNF846	0.63788	1.15416e-10
RP11-326C3.2	B4GALNT4	0.637872	1.15502e-10
RP5-888M10.2	CCDC91	0.637836	1.1586e-10
OSER1-AS1	TAF6	0.637817	1.16055e-10
RP11-1079K10.3	MCM3AP	0.63781	1.16126e-10
OSER1-AS1	CCDC91	0.63779	1.1633e-10
CTB-133G6.2	ARHGEF18	0.637632	1.17949e-10
LINC00954	CD84	0.63761	1.18173e-10
RP11-685M7.3	FITM2	0.637575	1.18538e-10
RP11-379F4.4	CRELD1	0.637528	1.19026e-10
RP11-960L18.1	CARD8	0.637475	1.19574e-10
CKMT2-AS1	ARMC10	0.637465	1.19686e-10
INTS6-AS1	CRELD1	0.637442	1.19925e-10
RP11-295M18.2	SMUG1	0.637354	1.20849e-10
RP11-575L7.4	LHX4	0.637353	1.20859e-10
RP11-967K21.1	MADCAM1	0.637345	1.20944e-10
CCND2-AS2	DET1	0.637287	1.21555e-10
ZNF205-AS1	TMEM106A	0.637095	1.23612e-10
RP11-295M18.2	ZBED5	0.637045	1.24154e-10
RP13-228J13.1	CIITA	0.637039	1.24223e-10
RP11-196G11.2	DET1	0.637018	1.24446e-10
CTD-2006C1.12	CEP41	0.636968	1.24987e-10
MRPL23-AS1	FITM2	0.636947	1.25222e-10
RP11-159F24.6	STX16	0.636669	1.28292e-10
RP11-473M20.11	ZNF862	0.636664	1.28351e-10
RP3-414A15.2	TRMT2B	0.636539	1.29758e-10
RP11-692D12.1	CIITA	0.636477	1.30452e-10
RP11-227G15.2	C17orf75	0.636354	1.31861e-10
CTD-2530H12.2	ACTR3	0.636262	1.32925e-10
RP11-227G15.2	CTBP1	0.636256	1.32984e-10
DICER1-AS1	CIITA	0.636255	1.33002e-10
RP11-473M20.14	ZNF763	0.636214	1.33478e-10
TMEM44-AS1	ARMC10	0.636135	1.34399e-10
RP1-93H18.1	C10orf95	0.636112	1.34671e-10
RP5-888M10.2	GEMIN7	0.636064	1.35226e-10
RAD51-AS1	TTYH1	0.635951	1.36563e-10
RP5-886K2.3	MADCAM1	0.635835	1.37945e-10
RP5-886K2.3	RAD50	0.635805	1.38312e-10
IQCH-AS1	CAPS	0.635715	1.39397e-10
AC007228.11	RNF135	0.635656	1.4011e-10
RP11-752G15.8	ZNF862	0.635533	1.4161e-10
LUCAT1	ATP13A3	0.635516	1.41825e-10
RP11-473M20.11	GEMIN7	0.635507	1.4193e-10
TMEM44-AS1	TAF6	0.635434	1.42836e-10
RP11-752G15.8	C10orf95	0.635423	1.42972e-10
RP5-888M10.2	SMUG1	0.63542	1.43013e-10
AC005224.2	CIITA	0.635319	1.44266e-10
RP11-196G11.2	ZNF248	0.635253	1.45096e-10
RP11-15E18.1	INTS3	0.635215	1.45567e-10
BDNF-AS	DET1	0.635189	1.45896e-10
RP11-162G10.5	C10orf95	0.635077	1.47327e-10
RP11-389O22.1	GPR89B	0.635071	1.47394e-10
CTD-2201I18.1	PTCD2	0.634959	1.48834e-10
RP11-122G18.5	DCP1B	0.634927	1.49252e-10
RP11-18I14.10	ZNF763	0.634883	1.4982e-10
RP13-228J13.1	CARD8	0.634865	1.50052e-10
INTS6-AS1	GEMIN8	0.634863	1.50074e-10
DICER1-AS1	STX16	0.634795	1.50964e-10
CKMT2-AS1	ZNF594	0.634745	1.51623e-10
RP11-15E18.1	HEXDC	0.634744	1.51634e-10
RAD51-AS1	DBT	0.634735	1.51755e-10
RP11-54O7.18	SLC37A1	0.6347	1.52212e-10
RP11-1070N10.6	GPR42	0.634657	1.52777e-10
CTD-2619J13.3	CIITA	0.634628	1.53161e-10
AD000090.2	LHX4	0.634572	1.5391e-10
CTD-2324F15.2	CD84	0.634452	1.55507e-10
AC007551.3	STX16	0.63443	1.55804e-10
CTD-2245F17.3	GEMIN8	0.63439	1.56342e-10
DICER1-AS1	KIAA1841	0.634338	1.5705e-10
RP11-267N12.3	FAN1	0.634336	1.57074e-10
DICER1-AS1	CCDC53	0.634277	1.57879e-10
CCND2-AS2	CD34	0.634228	1.58546e-10
AC008746.3	DET1	0.634164	1.59425e-10
RP11-122G18.5	CARD8	0.634027	1.61319e-10
CTD-2528L19.6	SMUG1	0.633879	1.63397e-10
RP11-260M19.2	KIF26A	0.633878	1.63414e-10
AP001056.1	ZNF862	0.633822	1.64202e-10
RP11-932O9.7	CIITA	0.633734	1.65455e-10
CTD-2201I18.1	ZNF470	0.63373	1.65509e-10
AC006378.2	CCDC91	0.633612	1.67203e-10
TMCC1-AS1	CARD8	0.633352	1.70986e-10
RP13-228J13.1	INTS3	0.633318	1.71488e-10
LINC00959	CTBP1	0.633258	1.72379e-10
RP5-1086K13.1	ARMC10	0.633209	1.73114e-10
RP11-389O22.1	LRP11	0.6332	1.73243e-10
RP11-308D16.4	CARD8	0.633176	1.73603e-10
AC005224.2	FMO5	0.633173	1.73652e-10
RP11-35G9.3	C21orf33	0.633076	1.75105e-10
RP11-35G9.3	KIAA1841	0.633009	1.76119e-10
CTD-2245F17.3	C14orf144	0.632988	1.76434e-10
RP11-359G22.2	CEP41	0.632963	1.76812e-10
SRRM2-AS1	ANKRD30B	0.63295	1.77009e-10
RAD51-AS1	DET1	0.63295	1.77011e-10
RP11-418J17.1	ARMC10	0.632844	1.78631e-10
BDNF-AS	GEMIN8	0.632833	1.78797e-10
AC009948.5	KIAA1841	0.632807	1.79198e-10
CTD-2541M15.1	HDHD2	0.632743	1.8019e-10
USP46-AS1	GEMIN8	0.63267	1.81317e-10
RP11-433J8.1	ANKRD30B	0.632645	1.8171e-10
LENG8-AS1	ZFHX2	0.632607	1.823e-10
AC005775.2	SMARCAL1	0.632603	1.82367e-10
RP11-267N12.3	ZNF862	0.632553	1.83151e-10
RP11-576N17.5	C14orf144	0.632489	1.84155e-10
RP11-428J1.5	ZNF607	0.632474	1.84397e-10
RP5-888M10.2	DBT	0.632379	1.85909e-10
RP11-477N3.1	CCDC53	0.632204	1.88714e-10
CTD-2006C1.12	METTL4	0.63217	1.89268e-10
RP11-473M20.7	NDUFAF6	0.632151	1.89579e-10
UGDH-AS1	DBNL	0.63209	1.90563e-10
RP11-473M20.11	ZNF846	0.63206	1.91063e-10
ZBED3-AS1	CEP41	0.632049	1.91244e-10
ZBED3-AS1	TACR1	0.632022	1.91685e-10
RP11-686D22.8	ARL4D	0.631943	1.92988e-10
AP001056.1	TMLHE	0.631936	1.93097e-10
RP11-229P13.20	NDUFAF6	0.6319	1.93705e-10
AC005224.2	FAN1	0.631862	1.94334e-10
RP11-333E1.1	NAPSA	0.631849	1.94549e-10
RP11-575L7.4	TMEM106A	0.631791	1.95519e-10
RP11-672A2.4	ETNK2	0.63176	1.96034e-10
AC009948.5	PTCD2	0.631747	1.96246e-10
RP11-389O22.1	C5orf28	0.631563	1.99371e-10
RP11-575L7.4	CTB-133G6.1	0.63156	1.99412e-10
RBFADN	RBFA	0.631518	2.00142e-10
UGDH-AS1	METTL4	0.631496	2.00518e-10
RP11-418J17.1	INTS3	0.631467	2.0101e-10
RP1-93H18.1	TMLHE	0.631435	2.01567e-10
AC006378.2	ZNF862	0.631402	2.0213e-10
AC009501.4	MADCAM1	0.631294	2.04001e-10
RP11-87C12.5	PRSS27	0.631195	2.05747e-10
RP3-329E20.2	ATP13A3	0.631043	2.08418e-10
AC009948.5	RP11-1055B8.7	0.631027	2.08709e-10
RP11-227G15.2	FITM2	0.631017	2.08888e-10
RP11-308D16.4	ZNF573	0.630998	2.09222e-10
DICER1-AS1	GEMIN8	0.630988	2.09411e-10
RP11-806H10.4	ACSL1	0.630972	2.09686e-10
AC004041.2	FAN1	0.63091	2.10799e-10
AC098820.3	HDHD2	0.63091	2.10802e-10
LENG8-AS1	CCDC91	0.630812	2.12571e-10
RP11-977G19.12	SMARCAL1	0.6308	2.12791e-10
AC007551.3	SMARCAL1	0.630749	2.1373e-10
RP1-93H18.1	HDHD2	0.630632	2.15858e-10
RP11-418J17.1	ANAPC7	0.630606	2.16346e-10
RP11-389O22.1	METTL4	0.630557	2.17247e-10
RP11-328D5.1	DET1	0.630547	2.17428e-10
RP11-35G9.3	CMPK2	0.630512	2.18087e-10
RP11-473M20.7	ZNF846	0.630502	2.18278e-10
LINC00514	LDB3	0.630401	2.20154e-10
RP11-977G19.12	IPO9	0.6304	2.20179e-10
RP11-35G9.3	SLAMF6	0.630362	2.20885e-10
RP11-10K16.1	LHX4	0.630341	2.21283e-10
RP5-888M10.2	FAN1	0.630324	2.21611e-10
RP1-93H18.1	LHX4	0.630297	2.22124e-10
RP11-379F4.4	TMLHE	0.630265	2.22712e-10
MCM3AP-AS1	SMUG1	0.630193	2.24082e-10
AC007228.11	GEMIN7	0.630168	2.24562e-10
RP5-888M10.2	FITM2	0.630034	2.27135e-10
RP11-308D16.4	PTCD2	0.630017	2.27473e-10
LA16c-390H2.4	SLX4	0.630007	2.27663e-10
CTD-2006C1.12	ZNF248	0.63	2.27808e-10
RP5-1086K13.1	CTBP1	0.629885	2.30038e-10
RP11-981G7.1	LHX4	0.629844	2.30836e-10
TAPT1-AS1	MADCAM1	0.629711	2.33467e-10
RP11-806H10.4	CD300E	0.629645	2.34782e-10
TMCC1-AS1	SMUG1	0.629594	2.35791e-10
RP11-171I2.1	PRCD	0.629531	2.37056e-10
AC008746.3	ANAPC7	0.629527	2.37145e-10
ZBED3-AS1	CRELD1	0.62948	2.38093e-10
RP11-554I8.1	ZNF248	0.62947	2.38292e-10
RP11-379F4.4	TAF6	0.629338	2.40989e-10
RP11-379F4.4	INTS3	0.629301	2.41745e-10
RP11-18F14.1	HS3ST3B1	0.629272	2.42333e-10
UGDH-AS1	CEP41	0.629191	2.44011e-10
RP11-1157N2-B.2	FMO5	0.629167	2.44498e-10
RP11-473M20.11	INTS3	0.629147	2.44912e-10
CTD-2006K23.1	VAT1L	0.629146	2.44946e-10
TMLHE-AS1	TRMT2B	0.629093	2.46038e-10
RP1-249H1.4	MARC1	0.629021	2.47559e-10
OSER1-AS1	ARMC10	0.629007	2.47842e-10
RP11-575L7.4	HDHD2	0.628995	2.48094e-10
RP11-18F14.1	GPR32	0.628989	2.48215e-10
UGDH-AS1	HEXDC	0.628985	2.48299e-10
RP11-122G18.5	RAD50	0.628954	2.48955e-10
AC008746.3	RAD50	0.62895	2.49052e-10
ZNRD1-AS1	FAN1	0.628839	2.5139e-10
RP11-371F15.3	FMO5	0.628827	2.5165e-10
LUCAT1	PYGL	0.62877	2.52878e-10
RP11-506M12.1	FAN1	0.62874	2.53522e-10
IQCH-AS1	MADCAM1	0.628728	2.53778e-10
AC098820.3	CCDC91	0.62868	2.54813e-10
RP11-347C12.10	CD2BP2	0.628598	2.56571e-10
RP11-305E17.6	CIITA	0.628581	2.56951e-10
CTD-2555O16.1	TRMT2B	0.628559	2.57428e-10
SPTY2D1-AS1	LRRC18	0.628537	2.57915e-10
AC009948.5	TMEM106A	0.628478	2.59206e-10
INTS6-AS1	DBNL	0.628296	2.6322e-10
LINC00910	PRSS27	0.62828	2.63583e-10
RP11-575L7.4	GEMIN7	0.628221	2.64889e-10
RP11-459E5.1	LRRC32	0.628213	2.65062e-10
LENG8-AS1	ACYP2	0.62813	2.66939e-10
RP11-267N12.3	METTL4	0.628085	2.67954e-10
RP11-682N22.1	ZNF607	0.628059	2.68547e-10
AC006378.2	FAN1	0.628007	2.69736e-10
RP11-229P13.20	ENG	0.62795	2.71019e-10
LINC00959	GEMIN7	0.627862	2.73042e-10
RP11-418J17.1	HDHD2	0.627823	2.73953e-10
RP11-333E1.1	GEMIN8	0.62782	2.74011e-10
RP11-428J1.5	TRNAU1AP	0.627759	2.75423e-10
APCDD1L-AS1	RP11-1055B8.7	0.627731	2.76094e-10
RP11-359G22.2	GPR89B	0.627702	2.76758e-10
RP11-473M20.11	ENG	0.627664	2.77653e-10
RP11-459E5.1	RARRES1	0.627641	2.78192e-10
RP4-655J12.4	CARD8	0.627544	2.80477e-10
DICER1-AS1	TMEM106A	0.627524	2.80942e-10
UGDH-AS1	FAN1	0.627516	2.81142e-10
RP11-373N22.3	SPINK7	0.6275	2.8151e-10
RP11-689B22.2	NAPSA	0.627496	2.81612e-10
AC020594.5	DCP1B	0.627454	2.82604e-10
LENG8-AS1	SLAMF6	0.627435	2.8306e-10
RP11-506M12.1	TAF6	0.627394	2.84035e-10
CKMT2-AS1	CCDC53	0.627369	2.84634e-10
RP11-418J17.1	ZNF846	0.627255	2.874e-10
AC007551.3	CARD8	0.627206	2.88582e-10
RP11-960L18.1	DBNL	0.627195	2.88835e-10
AC104532.4	ZNF763	0.627155	2.89821e-10
RP11-305E17.6	ZNF846	0.627089	2.9143e-10
LENG8-AS1	CEP41	0.627069	2.91924e-10
RP11-162G10.5	DET1	0.627049	2.92414e-10
RP11-80H8.4	CHST2	0.626981	2.94104e-10
TMLHE-AS1	CARD8	0.626945	2.95e-10
RP11-308D16.4	BLNK	0.626941	2.95078e-10
TMEM44-AS1	KIAA1841	0.626918	2.95661e-10
RP11-428J1.5	CCDC91	0.626813	2.98286e-10
LINC00471	SCCPDH	0.626762	2.99569e-10
TMEM44-AS1	HEXDC	0.626738	3.00165e-10
PRSS51	PRSS55	0.626661	3.02128e-10
MCM3AP-AS1	ZNF248	0.626617	3.03245e-10
RP11-18I14.10	RAD50	0.626557	3.04766e-10
RP3-329E20.2	UPB1	0.626485	3.06632e-10
RP11-18I14.10	KIAA1841	0.626473	3.06942e-10
CTD-2555O16.1	ZNF763	0.626391	3.09037e-10
SRRM2-AS1	RP11-1055B8.7	0.626337	3.10462e-10
LA16c-390H2.4	EIF4G3	0.626325	3.10755e-10
RP11-575L7.4	C14orf93	0.626286	3.11794e-10
CTD-2006C1.12	PTCD2	0.626231	3.13235e-10
RP11-87C12.5	LRRC18	0.626199	3.14082e-10
RP11-227G15.2	HEXDC	0.626172	3.14785e-10
CTB-191K22.6	ZNF573	0.626087	3.17026e-10
PPP1R26-AS1	KRT7	0.626034	3.18458e-10
RP5-1077I2.3	ISM1	0.626006	3.19205e-10
TMEM44-AS1	CEP41	0.625746	3.26238e-10
RP5-1180C10.2	ZNF607	0.625691	3.27749e-10
GRIFIN	ZNF573	0.6256	3.30232e-10
IQCH-AS1	TAF6	0.625573	3.31005e-10
RP11-575L7.4	TRMT2B	0.625516	3.32569e-10
CTD-3116E22.7	PTGR2	0.625449	3.34454e-10
RP11-967K21.1	ZFHX2	0.625417	3.35353e-10
LA16c-390H2.4	DBNL	0.625414	3.35415e-10
RP5-1077I2.3	CD84	0.625385	3.36243e-10
AC005224.2	CCDC91	0.625375	3.36524e-10
CTD-2619J13.3	MADCAM1	0.62525	3.40073e-10
RP11-473M20.14	INTS3	0.625176	3.42171e-10
RP11-806H10.4	ECE1	0.625175	3.42213e-10
CTD-3060P21.1	C21orf67	0.625166	3.42462e-10
TMEM44-AS1	ZNF573	0.62516	3.42617e-10
RP11-685M7.3	MADCAM1	0.625036	3.46199e-10
LENG8-AS1	TAF6	0.625023	3.46573e-10
CTD-2530H12.2	CD300LD	0.625008	3.47016e-10
RP11-692D12.1	C10orf95	0.62498	3.47812e-10
DICER1-AS1	SMARCAL1	0.624975	3.4797e-10
RP11-477N3.1	INTS3	0.624948	3.48742e-10
AC005775.2	CYFIP2	0.624822	3.52433e-10
SOCS2-AS1	KIAA1841	0.624783	3.53604e-10
FAM225A	TRPV4	0.624736	3.54983e-10
TMEM44-AS1	MADCAM1	0.624699	3.56093e-10
RP5-886K2.3	PTGR2	0.624683	3.5656e-10
LENG8-AS1	FMO5	0.624643	3.57763e-10
AC093627.12	ACSL1	0.624625	3.58285e-10
RP11-309L24.2	GAL3ST2	0.624544	3.60706e-10
AC104532.4	CCDC91	0.624471	3.62918e-10
RP11-218M22.1	SMARCAL1	0.624399	3.65115e-10
AC114730.2	NEU4	0.624237	3.7006e-10
AC006378.2	TAF6	0.624196	3.7135e-10
RP11-473M20.14	CCDC91	0.624188	3.71588e-10
RP4-655J12.4	ZNF573	0.624159	3.72492e-10
RP11-35G9.3	ZNF573	0.624156	3.72589e-10
CTD-2619J13.14	C10orf95	0.624106	3.74135e-10
SOCS2-AS1	ZNF862	0.624076	3.7506e-10
XXbac-B135H6.15	TYMP	0.624007	3.77236e-10
DICER1-AS1	PRCD	0.623933	3.79562e-10
LENG8-AS1	ZBED5	0.62391	3.8029e-10
AC007551.3	INTS3	0.623907	3.80396e-10
RP11-466F5.8	ZNF248	0.623834	3.82692e-10
RP11-876N24.4	MADCAM1	0.623814	3.83351e-10
RP11-932O9.7	DBNL	0.623785	3.84264e-10
TMCC1-AS1	CD34	0.623701	3.86966e-10
INTS6-AS1	FAN1	0.623669	3.87975e-10
RP11-16E12.2	ZNF846	0.623639	3.88947e-10
CTD-2006C1.12	RAD50	0.623631	3.89231e-10
RP4-782L23.1	ZNF573	0.6236	3.90227e-10
AC017116.11	CD37	0.623571	3.91169e-10
AC009948.5	MADCAM1	0.623477	3.94243e-10
RP11-418J17.1	HEXDC	0.623449	3.95165e-10
RP11-885B4.2	ZNF846	0.623437	3.95542e-10
RP5-886K2.3	C10orf95	0.623424	3.95981e-10
RPL34-AS1	PRSS27	0.623421	3.96084e-10
RP11-981G7.1	TACR1	0.623419	3.96141e-10
LINC00959	RAD50	0.623405	3.96598e-10
CCND2-AS1	PRSS27	0.623393	3.96997e-10
AC104532.4	C10orf95	0.623363	3.97972e-10
RP11-350J20.5	ATP13A3	0.623334	3.98928e-10
CTD-2619J13.3	ZNF862	0.623319	3.99444e-10
AC098820.3	ZNF594	0.623245	4.01918e-10
RP11-885B4.2	TMLHE	0.623219	4.02779e-10
RP1-93H18.1	ZNF573	0.623151	4.05059e-10
RP11-10K16.1	ZNF846	0.623142	4.0537e-10
MCM3AP-AS1	WDR4	0.623079	4.07495e-10
CKMT2-AS1	BET1	0.623011	4.09783e-10
UGDH-AS1	DBT	0.622971	4.11135e-10
DICER1-AS1	HEXDC	0.622913	4.1313e-10
AC009501.4	METTL4	0.622892	4.13841e-10
RP11-473M20.14	ACYP2	0.622881	4.14227e-10
DICER1-AS1	SMUG1	0.622879	4.14304e-10
RP3-510O8.4	KANK1	0.622822	4.16247e-10
OSER1-AS1	CARD8	0.622804	4.16874e-10
AP001056.1	MCM3AP	0.622691	4.20812e-10
RP11-359G22.2	SMUG1	0.622606	4.23779e-10
MCM3AP-AS1	CCDC91	0.622573	4.24957e-10
RP11-122G18.5	DET1	0.622419	4.3038e-10
CTD-2528L19.6	WDR4	0.622365	4.32318e-10
RP11-707G14.7	RAD50	0.622318	4.34015e-10
RP11-267N12.3	CRELD1	0.622306	4.34443e-10
SRRM2-AS1	CD84	0.622171	4.39323e-10
CTD-2555O16.1	SEMA4B	0.622153	4.39969e-10
RP1-187B23.1	ADARB1	0.622094	4.42133e-10
CTB-191K22.6	TRMT2B	0.621936	4.47954e-10
RP11-1079K10.3	CTB-133G6.1	0.621878	4.50092e-10
MRPL23-AS1	DET1	0.62179	4.53387e-10
CTD-2528L19.6	CNPY2	0.621759	4.54559e-10
RP11-707G14.7	CEP41	0.621757	4.54623e-10
MCM3AP-AS1	GEMIN8	0.621742	4.5519e-10
AC009948.5	IGFL4	0.621697	4.5688e-10
RP11-10K16.1	CARD8	0.621694	4.56981e-10
LENG8-AS1	CCDC180	0.621647	4.58758e-10
SRRM2-AS1	MADCAM1	0.621642	4.58948e-10
AC009948.5	INTS3	0.621624	4.59643e-10
RP11-333E1.2	GEMIN7	0.62159	4.6092e-10
RP11-981G7.1	FAN1	0.62154	4.62845e-10
RP11-967K21.1	SMARCAL1	0.621493	4.64637e-10
RP11-1079K10.3	ALG13	0.621361	4.6971e-10
RP11-885B4.2	LHX4	0.621298	4.72168e-10
RP1-249H1.4	PYGL	0.621283	4.72735e-10
RP11-379F4.4	CNPY2	0.621269	4.73317e-10
RP3-416H24.1	FLNC	0.621262	4.73561e-10
RP11-159F24.6	GEMIN7	0.621242	4.74342e-10
BDNF-AS	NDUFAF6	0.621182	4.76705e-10
TRAPPC12-AS1	METTL4	0.62116	4.7757e-10
AC004840.9	TMEM106A	0.621133	4.78635e-10
SPTY2D1-AS1	TTYH1	0.621118	4.79224e-10
RP11-298I3.4	C14orf93	0.621029	4.82742e-10
CTD-2006C1.12	CRELD1	0.620998	4.83979e-10
RP11-355N15.1	KIAA1841	0.620963	4.85374e-10
RP11-473M20.14	DBNL	0.62096	4.85524e-10
RP11-389O22.1	SLAMF6	0.620932	4.86614e-10
RP11-425I13.3	C21orf33	0.620923	4.86983e-10
RP11-452L6.1	CIITA	0.620885	4.88532e-10
INTS6-AS1	FITM2	0.620883	4.88593e-10
TRAPPC12-AS1	HDHD2	0.620871	4.89082e-10
LINC00959	BLNK	0.620795	4.92151e-10
AC004840.9	SMARCAL1	0.620794	4.9217e-10
AC007551.3	CCDC53	0.620755	4.93765e-10
RP11-10K16.1	CIITA	0.62069	4.96438e-10
ZNF582-AS1	ZNF582	0.620635	4.98676e-10
ZNRD1-AS1	ZNF763	0.620523	5.033e-10
RP11-473M20.7	OBFC1	0.620507	5.03951e-10
RP11-359G22.2	KIAA1841	0.620478	5.05164e-10
RP11-308D16.4	FITM2	0.62037	5.09647e-10
AC009948.5	CRELD1	0.62031	5.12193e-10
LINC00959	FAN1	0.620287	5.13145e-10
RP11-359G22.2	ZNF607	0.620269	5.13897e-10
RP11-531A24.5	TMEM105	0.620263	5.1414e-10
AC009501.4	ZNF573	0.620262	5.14181e-10
AC098820.3	C21orf33	0.620184	5.17525e-10
RP11-428J1.5	SORD	0.620178	5.17775e-10
RP11-266L9.5	PRCD	0.620151	5.18924e-10
RP11-295M18.2	CRELD1	0.620147	5.19089e-10
TMCC1-AS1	FMO5	0.620136	5.19541e-10
RP5-1086K13.1	CNPY2	0.620104	5.20936e-10
AC012358.7	C14orf93	0.619974	5.26509e-10
RP11-229P13.20	OBFC1	0.61979	5.34504e-10
RP11-218L14.4	ALG13	0.619651	5.40644e-10
ZNRD1-AS1	BLNK	0.619578	5.43876e-10
MCM3AP-AS1	ZNF607	0.619574	5.44061e-10
ALG13-AS1	NAPSA	0.619571	5.44212e-10
SPTY2D1-AS1	CIITA	0.619505	5.47169e-10
RP11-2E11.5	CCDC180	0.619458	5.49264e-10
AC147651.3	PSD3	0.619407	5.51565e-10
RP11-80H8.3	MGAT5B	0.619382	5.52676e-10
RP11-389O22.1	CNPY2	0.619315	5.55734e-10
RP11-359G22.2	CARD8	0.619274	5.57609e-10
RP11-295M18.2	PRSS27	0.619191	5.61412e-10
RAD51-AS1	RAD50	0.619136	5.63943e-10
LINC00471	BLNK	0.619133	5.64102e-10
RP11-473M20.14	PRCD	0.619122	5.6459e-10
RP11-682N22.1	LHX4	0.619089	5.66121e-10
RP11-228B15.4	STX16	0.619076	5.66704e-10
RP11-389O22.1	NDUFV3	0.619048	5.68016e-10
RP11-473M20.14	BLNK	0.619047	5.68081e-10
AC068039.4	C10orf95	0.619036	5.68567e-10
UGDH-AS1	GEMIN7	0.618977	5.71322e-10
BDNF-AS	FITM2	0.618973	5.71515e-10
RP11-575L7.4	CIITA	0.618844	5.77593e-10
IQCH-AS1	OBFC1	0.618746	5.8222e-10
RP11-715J22.2	IGFL4	0.618663	5.86202e-10
TRAPPC12-AS1	LHX4	0.618659	5.86352e-10
TRAPPC12-AS1	WDR4	0.618637	5.87411e-10
RP11-418J17.1	C10orf95	0.618438	5.97045e-10
RP11-506M12.1	LHX4	0.618436	5.97153e-10
AP001056.1	TRMT2B	0.618392	5.99293e-10
MCM3AP-AS1	HDHD2	0.618392	5.99304e-10
ZNF582-AS1	C14orf93	0.618338	6.01932e-10
AC093627.12	BAIAP2	0.618331	6.02285e-10
RAD51-AS1	ANAPC7	0.618303	6.03679e-10
RP11-425I13.3	INTS3	0.618298	6.03937e-10
SPTY2D1-AS1	FMO5	0.618233	6.07114e-10
CTB-191K22.6	HEXDC	0.618191	6.09214e-10
RP11-333E1.1	MADCAM1	0.618162	6.10672e-10
UGDH-AS1	CRELD1	0.618161	6.10679e-10
RP11-981G7.1	LRRC18	0.618088	6.1434e-10
BDNF-AS	ZNF862	0.617996	6.18987e-10
RP11-977G19.12	CCDC91	0.617908	6.23449e-10
RP11-418J17.1	PTGR2	0.617896	6.24047e-10
RP11-672A2.4	FGF2	0.617817	6.28048e-10
AC009501.4	PTCD2	0.617708	6.33673e-10
UGDH-AS1	CDKL1	0.617683	6.34947e-10
RP11-305E17.6	SMUG1	0.617638	6.37288e-10
TMCC1-AS1	LHX4	0.617567	6.40975e-10
RP11-932O9.7	ZNF862	0.617538	6.42522e-10
OSER1-AS1	CD58	0.617518	6.43549e-10
RP13-228J13.1	SMARCAL1	0.617463	6.46408e-10
MCM3AP-AS1	TMEM106A	0.617457	6.46746e-10
FAM222A-AS1	GPR32	0.61743	6.48158e-10
CTD-2528L19.6	HDHD2	0.617406	6.49431e-10
RP5-886K2.3	ZNF862	0.61736	6.51859e-10
OSER1-AS1	ZNF573	0.617319	6.54074e-10
CTD-2006C1.12	BLNK	0.617303	6.54926e-10
RP11-568J23.6	HIAT1	0.617268	6.56768e-10
AC093627.12	ATP13A3	0.6172	6.6042e-10
RP11-1079K10.3	SPINK9	0.617062	6.67831e-10
SOCS2-AS1	OBFC1	0.617001	6.71185e-10
RP11-355N15.1	ZNF573	0.616987	6.71951e-10
AC004041.2	RAD50	0.616983	6.72167e-10
CTD-2528L19.6	METTL4	0.616873	6.78169e-10
RP11-452L6.1	LHX4	0.61673	6.86127e-10
AC005775.2	CEP41	0.616712	6.87081e-10
RP11-359G22.2	HDHD2	0.616665	6.89754e-10
RP11-165F24.3	KIF27	0.616656	6.9026e-10
RP11-960L18.1	HDHD2	0.616562	6.95542e-10
RP11-576N17.5	CCDC53	0.616507	6.98617e-10
TOB1-AS1	GEMIN7	0.616497	6.99204e-10
RP3-329E20.2	UNCX	0.616462	7.01202e-10
TMLHE-AS1	PTGR2	0.616379	7.05899e-10
LINC00959	ZNF607	0.616302	7.10327e-10
RP11-118B18.1	FAM20C	0.616274	7.11941e-10
IGF2-AS	TSKU	0.61622	7.15089e-10
RP11-848P1.3	RNF135	0.616211	7.15586e-10
RP3-414A15.2	ARMC10	0.616187	7.16992e-10
RP11-752G15.8	CEP41	0.616116	7.21128e-10
RP11-932O9.7	ZNF846	0.616111	7.21387e-10
CTD-2541M15.1	PTCD2	0.616064	7.24186e-10
RP11-308D16.4	WDR4	0.616048	7.25089e-10
CTD-2619J13.3	LHX4	0.616031	7.26076e-10
TMEM44-AS1	FBXO38	0.616	7.27941e-10
RP11-162G10.5	BLNK	0.615966	7.29937e-10
AC008746.3	ZNF862	0.615874	7.35397e-10
RP11-267N12.3	GPR89B	0.615797	7.39966e-10
IQCH-AS1	CTBP1	0.615773	7.41438e-10
FAM225B	TYMP	0.615761	7.4213e-10
RAD51-AS1	CIITA	0.61574	7.43399e-10
RP11-932O9.7	CDKL1	0.615734	7.43751e-10
AC009501.4	CTBP1	0.615673	7.47403e-10
TMCC1-AS1	ZNF573	0.615561	7.54251e-10
RP11-355N15.1	SLAMF6	0.615519	7.56809e-10
LINC00959	GEMIN8	0.615492	7.5842e-10
RP11-35G9.3	TMEM106A	0.615492	7.58429e-10
RP11-247L20.3	TMLHE	0.615487	7.58757e-10
SRRM2-AS1	NAPSA	0.615417	7.63032e-10
ZNF205-AS1	TRMT2B	0.615373	7.65791e-10
RP11-308D16.4	CNPY2	0.615318	7.6921e-10
ALG13-AS1	FUT7	0.615293	7.7071e-10
AC005775.2	SMUG1	0.615213	7.75699e-10
RP11-15E18.1	TMLHE	0.615147	7.79871e-10
AC009948.5	C14orf93	0.615116	7.81853e-10
RP11-523O18.5	RP11-1055B8.7	0.615057	7.85555e-10
DICER1-AS1	CARD8	0.615034	7.87027e-10
RP11-540B6.6	C10orf95	0.615024	7.8766e-10
RP11-576N17.5	ZFHX2	0.615022	7.87799e-10
RP11-981G7.1	CARD8	0.615015	7.88246e-10
CTD-2555O16.1	ZNF470	0.614876	7.97135e-10
TOB1-AS1	CDKL1	0.614792	8.02541e-10
AC007551.3	NAPSA	0.6147	8.0849e-10
RP11-379F4.4	ACYP2	0.614651	8.11694e-10
AC007551.3	HDHD2	0.614632	8.12906e-10
RP11-568J23.5	CAB39	0.614601	8.14961e-10
RP11-452L6.1	GEMIN8	0.614599	8.15105e-10
SRRM2-AS1	CD34	0.614465	8.23955e-10
UGDH-AS1	ZNF213	0.614455	8.24623e-10
RP11-308D16.4	METTL4	0.614435	8.25919e-10
RP11-379F4.4	CEP41	0.614421	8.26862e-10
CTD-2561B21.10	FAN1	0.614418	8.27058e-10
SRRM2-AS1	PRSS27	0.614364	8.30655e-10
LENG8-AS1	ZNF846	0.614355	8.31288e-10
RP4-655J12.4	SMARCAL1	0.614256	8.37936e-10
AC012309.5	ZNF846	0.614236	8.39295e-10
RP5-888M10.2	PTCD2	0.614165	8.44081e-10
RP11-122G18.5	METTL4	0.614106	8.48074e-10
BDNF-AS	CCDC53	0.61409	8.49176e-10
RAD51-AS1	GEMIN8	0.614076	8.5012e-10
AC007551.3	MCM3AP	0.614032	8.53153e-10
LINC00959	ZNF846	0.614021	8.53906e-10
RP11-87C12.5	MGAT5B	0.614006	8.54938e-10
RP11-885B4.2	ZNF573	0.613969	8.57489e-10
AC005224.2	CRELD1	0.613877	8.63813e-10
MCM3AP-AS1	ZFHX2	0.613763	8.71799e-10
RP11-159F24.6	MADCAM1	0.613757	8.72236e-10
RP5-1180C10.2	GEMIN7	0.61362	8.81824e-10
AC009948.5	STX16	0.613607	8.82804e-10
TMLHE-AS1	MADCAM1	0.613484	8.91525e-10
CTB-133G6.2	GEMIN7	0.613361	9.0036e-10
MCM3AP-AS1	PTGR2	0.613304	9.04528e-10
RP11-692D12.1	ZNF846	0.61326	9.07666e-10
RP11-267N12.3	ZNF763	0.613198	9.12237e-10
AC004840.9	DET1	0.613193	9.1262e-10
MCM3AP-AS1	DCP1B	0.613188	9.12915e-10
RP11-477N3.1	LHX4	0.613186	9.13121e-10
CTD-2006C1.12	SMARCAL1	0.613152	9.15615e-10
RP3-414A15.2	FAN1	0.613129	9.17302e-10
RP11-932O9.7	MADCAM1	0.613054	9.22841e-10
RP3-414A15.2	CCDC91	0.613051	9.23026e-10
RP11-796E2.4	FXYD2	0.613022	9.25143e-10
CTD-3060P21.1	TMEM106A	0.613006	9.26334e-10
AC005775.2	ZNF862	0.61298	9.28272e-10
CTB-191K22.6	SPINT1	0.612925	9.32409e-10
AP001189.4	SLC37A1	0.612918	9.32879e-10
CCDC183-AS1	GLCCI1	0.612918	9.32922e-10
CCDC183-AS1	SMARCAL1	0.612894	9.34744e-10
RP11-554I8.1	GPR157	0.612704	9.49034e-10
RP11-333E1.1	CEP41	0.612682	9.50719e-10
AP001056.1	TMEM106A	0.612673	9.51423e-10
RP11-425I13.3	HDHD2	0.612624	9.55135e-10
RP11-418J17.1	CRELD1	0.612606	9.56466e-10
RP11-977G19.12	PKNOX1	0.612603	9.56718e-10
RP11-977G19.12	HDHD2	0.612581	9.58378e-10
RP5-886K2.3	CNPY2	0.612493	9.65144e-10
INTS6-AS1	NDUFAF6	0.612482	9.66041e-10
AC020594.5	ZNF607	0.612468	9.67086e-10
AC104532.4	FAN1	0.612407	9.71828e-10
RP11-267N12.3	PKNOX1	0.612385	9.7355e-10
RP11-967K21.1	IGFL4	0.612335	9.77442e-10
RP11-229P13.20	HDHD2	0.612302	9.80019e-10
CTD-2245F17.3	ZNF763	0.612297	9.80399e-10
AC004041.2	LHX4	0.612225	9.86068e-10
CKMT2-AS1	FAN1	0.612175	9.90014e-10
AC104532.4	TMEM106A	0.612147	9.92206e-10
INTS6-AS1	CEP41	0.612132	9.93442e-10
AC009948.5	GEMIN8	0.612112	9.95038e-10
TOB1-AS1	PTGR2	0.612083	9.97361e-10
RP11-473M20.7	PTGR2	0.612076	9.97863e-10
CTD-2619J13.14	DET1	0.612058	9.99355e-10
AC007551.3	DBNL	0.612053	9.99694e-10
RP11-473M20.14	OBFC1	0.612006	1.00349e-09
AC006378.2	HEXDC	0.611971	1.0063e-09
RP11-305E17.6	ZNF862	0.611906	1.01151e-09
AC009501.4	ANAPC7	0.611875	1.01405e-09
RP11-528G1.2	BCL7A	0.61182	1.01846e-09
RP5-1180C10.2	DCP1B	0.611708	1.0276e-09
RP11-981G7.1	ZNF573	0.611659	1.03163e-09
CCDC183-AS1	CEP41	0.611611	1.03561e-09
AC005775.2	ZNF573	0.611578	1.03829e-09
RP11-876N24.4	CIITA	0.611561	1.03972e-09
AD000090.2	CARD8	0.611499	1.04484e-09
CKMT2-AS1	C2orf74	0.611497	1.045e-09
AC098820.3	DCP1B	0.611465	1.04768e-09
RP11-473M20.7	CRELD1	0.611396	1.05351e-09
USP46-AS1	CCDC91	0.611387	1.05423e-09
RBFADN	HDHD2	0.611365	1.05605e-09
PRRT3-AS1	INTS3	0.611364	1.05621e-09
CTD-3116E22.7	ZNF846	0.611291	1.06237e-09
RP11-54O7.18	AGRN	0.611197	1.07031e-09
IGF2-AS	MUC12	0.611178	1.0719e-09
RP5-1180C10.2	INTS3	0.611171	1.07255e-09
RP11-18I14.10	CRELD1	0.611048	1.08307e-09
MIR503HG	SIGLEC14	0.610998	1.08736e-09
AC068039.4	SLAMF6	0.610998	1.0874e-09
TMLHE-AS1	KIAA1841	0.610934	1.09291e-09
RP5-888M10.2	KIAA1841	0.61091	1.09505e-09
RP11-981G7.1	CIITA	0.610868	1.09872e-09
INTS6-AS1	ACYP2	0.61083	1.10204e-09
RP11-462B18.2	ANAPC7	0.610735	1.1104e-09
RAD51-AS1	SMUG1	0.610716	1.11208e-09
RP5-1086K13.1	SDHC	0.610715	1.1121e-09
RP11-452L6.1	CARD8	0.610612	1.12127e-09
RP5-1180C10.2	IGFL4	0.610582	1.12394e-09
RP11-35J23.1	KIF27	0.610504	1.13091e-09
RP11-425I13.3	DET1	0.61047	1.13401e-09
RP11-18I14.10	CCDC180	0.61044	1.13667e-09
CTD-2619J13.14	CARD8	0.61039	1.14117e-09
RP11-122G18.5	ZNF213	0.610335	1.14619e-09
RP11-87G24.3	PGAM2	0.610317	1.1478e-09
CTD-2541M15.1	GEMIN8	0.610277	1.15147e-09
RP11-80H8.4	RP11-1055B8.7	0.610253	1.15365e-09
TRAPPC12-AS1	CCDC91	0.610225	1.15621e-09
RP11-752G15.8	TACR1	0.610178	1.16052e-09
CCDC183-AS1	DBT	0.610123	1.16561e-09
RP5-886K2.3	TACR1	0.61012	1.1659e-09
AC009501.4	CEP41	0.610106	1.1672e-09
CTB-179K24.3	ZNF573	0.610102	1.16759e-09
RAD51-AS1	HEXDC	0.610032	1.17406e-09
RP11-15F12.1	IGF2	0.610003	1.1768e-09
PRRT3-AS1	LHX4	0.609958	1.18096e-09
CTD-2619J13.3	FAN1	0.609891	1.18724e-09
RP11-159F24.6	CAPS	0.609846	1.19148e-09
RP5-1180C10.2	ZBED5	0.609845	1.19158e-09
RP11-1079K10.3	ZNF470	0.609793	1.1965e-09
RP11-308D16.4	ZNF470	0.609769	1.19878e-09
RP11-15E18.1	CRELD1	0.609723	1.20315e-09
RP11-295M18.2	CCDC91	0.609714	1.20405e-09
RP11-885B4.2	NDUFAF6	0.609603	1.21468e-09
AC007228.11	TRMT2B	0.609588	1.21607e-09
RP11-218M22.1	CIITA	0.60958	1.2169e-09
RP11-355N15.1	ZNF607	0.609573	1.21754e-09
RP11-267N12.3	TMEM106A	0.609563	1.21853e-09
CTB-191K22.6	SMARCAL1	0.609559	1.21888e-09
RP11-196G11.2	TTYH1	0.609508	1.22381e-09
AD000090.2	FMO5	0.609501	1.22454e-09
IQCH-AS1	KIAA1841	0.609488	1.22574e-09
RP11-351I24.1	RDH10	0.609484	1.22619e-09
RP5-1086K13.1	C10orf95	0.609476	1.22696e-09
RP11-16E12.2	TMEM106A	0.609471	1.22744e-09
SLC38A3	FOXK2	0.609465	1.22805e-09
LINC00959	TCEA2	0.609392	1.23507e-09
RP11-885B4.2	CARD8	0.609388	1.23554e-09
AC009948.5	TACR1	0.60927	1.24708e-09
RP11-267N12.3	TACR1	0.60927	1.24712e-09
RP1-93H18.1	METTL4	0.609098	1.26418e-09
AC009948.5	TMLHE	0.609037	1.27027e-09
AC004840.9	FAN1	0.608868	1.28733e-09
RP11-707G14.7	SMARCAL1	0.608841	1.29002e-09
AC074289.1	CD300E	0.608777	1.29657e-09
RP11-576N17.5	BDNF	0.60873	1.30141e-09
RP11-477N3.1	ZNF248	0.608718	1.30261e-09
RP11-473M20.14	FITM2	0.608693	1.30526e-09
RP11-433J8.1	NETO2	0.608665	1.30806e-09
AC009501.4	TAF6	0.608624	1.31237e-09
RP11-473M20.14	TMLHE	0.608619	1.31287e-09
CTD-2005H7.2	NDUFAF6	0.6086	1.31482e-09
CCND2-AS1	FMO5	0.60856	1.31899e-09
RP11-389O22.1	KIAA1841	0.608502	1.32508e-09
CTD-2006C1.12	SMUG1	0.608496	1.32563e-09
USP46-AS1	SMUG1	0.608486	1.32671e-09
RP11-977G19.12	CIITA	0.608471	1.32828e-09
RP11-267N12.3	IPO9	0.608395	1.33627e-09
IQCH-AS1	ZNF763	0.608364	1.33954e-09
RP11-15E18.1	ZFHX2	0.608357	1.34025e-09
LUCAT1	CD300LD	0.608309	1.34535e-09
AC009948.5	PTGR2	0.608258	1.35079e-09
ZNRD1-AS1	ZNF470	0.608232	1.35357e-09
STAG3L5P-PVRIG2P-PILRB	HEXDC	0.608231	1.35362e-09
AC009501.4	CCDC91	0.608211	1.35583e-09
ZNF582-AS1	CARD8	0.608177	1.35944e-09
AC098820.3	CDKL1	0.608017	1.37661e-09
UGDH-AS1	DCP1B	0.607949	1.38405e-09
PRRT3-AS1	SMARCAL1	0.607833	1.39674e-09
AC098820.3	TRMT2B	0.607819	1.39824e-09
RP11-692D12.1	STX16	0.607759	1.40483e-09
AC012358.7	KIF27	0.607752	1.40569e-09
RP11-932O9.7	DET1	0.607728	1.40836e-09
TMCC1-AS1	IGFL4	0.607721	1.40908e-09
CCDC183-AS1	DBNL	0.607697	1.41174e-09
AC002511.3	MMP25	0.607651	1.41685e-09
TRAPPC12-AS1	SMARCAL1	0.607641	1.41802e-09
RP11-87C12.5	ZFHX2	0.607612	1.42124e-09
RP11-389O22.1	VAT1L	0.607589	1.42383e-09
RP11-379F4.4	C10orf95	0.607585	1.42428e-09
VAV3-AS1	DET1	0.607567	1.4262e-09
INTS6-AS1	CDKL1	0.607536	1.42972e-09
OSER1-AS1	METTL4	0.607534	1.42997e-09
TMEM44-AS1	BLNK	0.607501	1.43367e-09
OSER1-AS1	C10orf95	0.607433	1.44136e-09
RP11-10K16.1	KIAA1841	0.607428	1.44188e-09
RP1-93H18.1	PTCD2	0.607412	1.44372e-09
RP11-308D16.4	ARMC10	0.607393	1.44593e-09
AP001625.6	NLRP6	0.607381	1.4472e-09
XXbac-B135H6.15	MARC1	0.607378	1.44758e-09
[truncated: 2,060 more rows]

## Sheet: Table S3_E
	The pathways enriched for relapse-specific lncRNAs in DUX4 subtype based on strongly correlated cis PC genes
Cis PC genes correlated with DUX4 relapse-specific lncRNAs (Gene Symbols)	Pathways	Number of cis PC genes correlated with DUX4 DE lncRNAs	P-value
ME3; CMPK2; MGAT5B; RDH10; DBT; TYMP; ACSL1; FPGS; FUT7; COQ2; ST8SIA5; LIPC; LSS; NDUFV1; NDUFV3; UPB1; PGAM2; PLCG2; ETNK2; CSGALNACT1; PYGL; SDHC; SORD; UGDH; UCK2; ALG13; DGAT2; PGS1; H6PD;	hsa01100: Metabolic pathways	29	0.000215047
INS; IRS1; SOCS2; CACNA1G;	hsa04930: Type II diabetes mellitus	4	0.00307473
FGF2; GNG11; NR4A1; IL2RA; INS; IRS1; MCL1; PDGFA; GNG13; THBS4; TCL1A;	hsa04151: PI3K-Akt signaling pathway	11	0.00323594
IL13; PLCG2; MAP2K7; GAB2;	hsa04664: Fc epsilon RI signaling pathway	4	0.0107245
INS; IRS1; FXYD2;	hsa04960: Aldosterone-regulated sodium reabsorption	3	0.0126169
RAD50; DNTT;	hsa03450: Non-homologous end-joining	2	0.0126774
FGF2; FLNC; NR4A1; PDGFA; PPM1B; MAP2K7; BDNF; CACNA1G;	hsa04010: MAPK signaling pathway	8	0.0132333
RPP40; CYFIP2; GEMIN8; NUP37; GEMIN7; EIF4G3;	hsa03013: RNA transport	6	0.0148698
GNAS; GNG11; H2AFB2; GNG13; BDNF; H2AFB3;	hsa05034: Alcoholism	6	0.0215335
NEU4; HEXDC;	hsa00511: Other glycan degradation	2	0.0220863
DNTT; IL2RA; CD34; CD37;	hsa04640: Hematopoietic cell lineage	4	0.0221853
TYMP; UPB1; UCK2;	hsa00983: Drug metabolism - other enzymes	3	0.0246422
CSGALNACT1; CHST3;	hsa00532: Glycosaminoglycan biosynthesis - chondroitin sulfate / dermatan sulfate	2	0.0264494
GNAS; GNG11; GNG13; CACNA1G;	hsa04713: Circadian entrainment	4	0.0299351
PDCD1; MADCAM1; CLDN9; CD34; CD58;	hsa04514: Cell adhesion molecules (CAMs)	5	0.0313909
INS; IRS1; CAB39;	hsa04150: mTOR signaling pathway	3	0.036593
FOXA2; INS;	hsa04950: Maturity onset diabetes of the young	2	0.0387037
BMPR1A; WNT11; FZD6; TEAD2; AJUBA;	hsa04390: Hippo signaling pathway	5	0.0396493
CMPK2; TYMP; UPB1; UCK2;	hsa00240: Pyrimidine metabolism	4	0.040205
ITK; PDCD1; PRKCQ; MAP2K7;	hsa04660: T cell receptor signaling pathway	4	0.0413291
IL2RA; IL15RA; ANAPC7; PDGFA; WNT11; FZD6; TP53INP1;	hsa05166: HTLV-I infection	7	0.0416962
BAIAP2; FGF2; CYFIP2; GSN; INS; PDGFA;	hsa04810: Regulation of actin cytoskeleton	6	0.0442274

## Sheet: Table S3_F
61 relapse-specific lncRNAs overlapped with prognostic markers (S-phase lncRNAs) from various cancers
Hypergeometric test is done on the overlap between relapse-specific lncRNAs (864, without duplicated lncRNAs) on 634 S-phase prognostic lncRNAs from Pan-cancer paper, we got a P-value of 0.00026 on the overlap
Geneid	Log Fold change	Subtype	freq	CANCERS
ENSG00000271966	1.89859	Ph-like	2	KICH
ENSG00000271966	1.89859	Ph-like	2	HNSC
ENSG00000271797	1.8237	DUX4	1	LIHC
ENSG00000214145	1.77415	NH-HeH	1	LIHC
ENSG00000249635	1.51711	DUX4	1	KIRC
ENSG00000225806	1.27449	DUX4	2	KIRC
ENSG00000225806	1.27449	DUX4	1	LIHC
ENSG00000267745	1.25311	DUX4	1	KIRC
ENSG00000229989	1.2083	DUX4	1	KIRC
ENSG00000258210	1.17875	DUX4	2	COAD
ENSG00000224950	1.16226	DUX4	1	HNSC
ENSG00000272377	1.15185	NH-HeH	1	STAD
ENSG00000251141	1.08203	NH-HeH	1	KIRC
ENSG00000235477	1.03684	DUX4	1	KIRC
ENSG00000272377	1.00079	DUX4	1	STAD
ENSG00000225431	0.979279	NH-HeH	1	KIRC
ENSG00000259005	0.97544	Ph-like	2	HNSC
ENSG00000259005	0.97544	Ph-like	1	THCA
ENSG00000245904	0.96976	NH-HeH	1	KIRC
ENSG00000245904	0.96976	NH-HeH	1	HNSC
ENSG00000253854	0.968324	NH-HeH	1	HNSC
ENSG00000258458	0.965853	NH-HeH	2	KICH
ENSG00000132832	0.954231	NH-HeH	2	KIRC
ENSG00000132832	0.954231	NH-HeH	1	KIRC
ENSG00000269275	0.950854	Ph-like	1	KIRP
ENSG00000273007	0.929317	DUX4	1	KICH
ENSG00000229956	0.923071	DUX4	3	BLCA
ENSG00000257496	0.907137	DUX4	1	KIRC
ENSG00000273321	0.88698	Ph-like	1	KIRC
ENSG00000232995	0.846196	DUX4	2	KICH
ENSG00000254343	0.840965	DUX4	1	KIRC
ENSG00000261971	0.81221	DUX4	1	KIRC
ENSG00000261971	0.81221	DUX4	1	HNSC
ENSG00000255142	0.802642	NH-HeH	1	KIRC
ENSG00000271270	0.797275	DUX4	2	KICH
ENSG00000271270	0.797275	DUX4	1	LIHC
ENSG00000262903	0.790551	NH-HeH	2	HNSC
ENSG00000262903	0.790551	NH-HeH	1	KIRC
ENSG00000203327	0.777733	DUX4	2	KIRC
ENSG00000203327	0.777733	DUX4	1	KIRC
ENSG00000249684	0.775187	DUX4	1	KIRC
ENSG00000203327	0.772392	NH-HeH	2	KIRC
ENSG00000203327	0.772392	NH-HeH	1	KIRC
ENSG00000224616	0.77007	DUX4	2	COAD
ENSG00000231154	0.74027	NH-HeH	1	HNSC
ENSG00000225177	0.732319	DUX4	2	COAD
ENSG00000225177	0.732319	DUX4	2	KIRC
ENSG00000245904	0.724871	DUX4	1	KIRC
ENSG00000245904	0.724871	DUX4	1	HNSC
ENSG00000227953	0.72159	DUX4	3	COAD
ENSG00000227953	0.72159	DUX4	2	COAD
ENSG00000231160	0.719502	DUX4	1	HNSC
ENSG00000251141	0.705541	DUX4	1	KIRC
ENSG00000272142	0.705163	DUX4	2	BLCA
ENSG00000272142	0.705163	DUX4	2	BLCA
ENSG00000237489	0.704421	DUX4	1	HNSC
ENSG00000251432	0.692845	DUX4	2	KICH
ENSG00000242798	0.665652	DUX4	2	KIRC
ENSG00000242798	0.665652	DUX4	1	KIRC
ENSG00000251661	0.652163	DUX4	1	BRCA
ENSG00000179406	0.634164	DUX4	1	KIRC
ENSG00000179406	0.634164	DUX4	1	KIRC
ENSG00000228544	0.624845	DUX4	1	KIRC
ENSG00000232931	0.619006	DUX4	2	HNSC
ENSG00000232931	0.619006	DUX4	2	HNSC
ENSG00000240291	0.618851	DUX4	2	HNSC
ENSG00000240291	0.618851	DUX4	1	KIRC
ENSG00000231770	0.58306	DUX4	1	BRCA
ENSG00000260219	-0.641505	DUX4	1	HNSC
ENSG00000237471	-0.696257	DUX4	1	KIRC
ENSG00000203999	-0.765603	DUX4	3	BRCA
ENSG00000203999	-0.765603	DUX4	2	COAD
ENSG00000237476	-0.772447	DUX4	2	BRCA
ENSG00000237476	-0.772447	DUX4	1	LUSC
ENSG00000223486	-0.797838	DUX4	1	KIRC
ENSG00000269959	-0.864987	DUX4	2	HNSC
ENSG00000269959	-0.864987	DUX4	2	KICH
ENSG00000261189	-0.972775	DUX4	2	BLCA
ENSG00000262152	-1.05997	DUX4	2	COAD
ENSG00000262152	-1.05997	DUX4	2	COAD
ENSG00000272502	-1.0858	NH-HeH	3	BRCA
ENSG00000272502	-1.0858	NH-HeH	2	KIRP
ENSG00000258701	-1.1876	DUX4	1	BLCA
ENSG00000248323	-1.18942	DUX4	3	KICH
ENSG00000248323	-1.18942	DUX4	3	KIRC
ENSG00000234432	-1.24077	NH-HeH	1	HNSC
ENSG00000259498	-1.31298	NH-HeH	1	BLCA
ENSG00000261584	-1.55421	DUX4	1	KIRC
ENSG00000261584	-1.55421	DUX4	1	HNSC
ENSG00000229619	-1.95917	NH-HeH	1	THCA
ENSG00000229619	-1.95917	NH-HeH	1	KIRC

## Sheet: Table S3_I
The relapse-specific lncRNAs co-expressed with PC genes which are activated in metabolic pathway. The PC genes are in proximity of >100 Kb
Highlighted lncRNAs are overlapped with recently published list of lncRNAs synergistically dysregulate metabolic pathways in pan-cancer
The lncRNAs are positively correlated and the following tables represents the Pearson correlation coefficient with P-value
Relapse specific DUX4 lncRNAs	Metabolic genes	Pearson correlation	P-value
AP000355.2	UPB1	0.921588	1.27416e-34
RP11-434I12.2	RDH10	0.827143	1.01734e-21
AC074289.1	PYGL	0.822198	2.83684e-21
ALG13-AS1	ALG13	0.817472	7.34237e-21
AC017076.5	CMPK2	0.801853	1.4136e-19
RP11-74C13.3	ETNK2	0.758469	1.5472e-16
RP11-651L5.2	PYGL	0.72009	2.45259e-14
RP11-54A4.2	UPB1	0.719107	2.76163e-14
RP11-619A14.2	LSS	0.710701	7.46679e-14
RP11-742D12.2	ST8SIA5	0.701126	2.22284e-13
RP11-80H8.4	MGAT5B	0.695607	4.08875e-13
TMEM44-AS1	DBT	0.690241	7.29972e-13
CTD-2530H12.2	PYGL	0.682446	1.65735e-12
CTD-2005H7.2	ME3	0.677849	2.65678e-12
RP3-329E20.2	PYGL	0.676299	3.10918e-12
PPP1R26-AS1	ETNK2	0.672781	4.42655e-12
RP11-1105O14.1	CSGALNACT1	0.668875	6.51609e-12
RP11-960L18.1	PLCG2	0.657705	1.90818e-11
APCDD1L-AS1	NDUFV1	0.6505	3.72677e-11
AC104532.4	DBT	0.647759	4.78559e-11
RP11-532F12.5	NDUFV1	0.647043	5.10617e-11
RP11-528G1.2	MGAT5B	0.645334	5.95726e-11
RP11-350J20.5	UPB1	0.642288	7.82285e-11
CTD-2245F17.3	ALG13	0.638664	1.07752e-10
FAM225A	TYMP	0.638386	1.10408e-10
RP5-1180C10.2	DBT	0.638163	1.12593e-10
RAD51-AS1	DBT	0.634735	1.51755e-10
RP5-888M10.2	DBT	0.632379	1.85909e-10
RP11-672A2.4	ETNK2	0.63176	1.96034e-10
LUCAT1	PYGL	0.62877	2.52878e-10
XXbac-B135H6.15	TYMP	0.624007	3.77236e-10
UGDH-AS1	DBT	0.622971	4.11135e-10
RP11-1079K10.3	ALG13	0.621361	4.6971e-10
RP1-249H1.4	PYGL	0.621283	4.72735e-10
RP11-218L14.4	ALG13	0.619651	5.40644e-10
RP11-80H8.3	MGAT5B	0.619382	5.52676e-10
FAM225B	TYMP	0.615761	7.4213e-10
RP11-87C12.5	MGAT5B	0.614006	8.54938e-10
RP5-1086K13.1	SDHC	0.610715	1.1121e-09
RP11-87G24.3	PGAM2	0.610317	1.1478e-09
CCDC183-AS1	DBT	0.610123	1.16561e-09
RP11-351I24.1	RDH10	0.609484	1.22619e-09
RP11-267N12.3	DBT	0.605422	1.68709e-09
MRPL23-AS1	NDUFV1	0.604652	1.79136e-09
RP11-94C24.11	ETNK2	0.604647	1.79204e-09
SRRM2-AS1	MGAT5B	0.604511	1.8112e-09
CTD-2384B11.2	PLCG2	0.604221	1.85239e-09
LINC00471	SORD	0.604012	1.8828e-09
LENG8-AS1	DBT	0.602062	2.18929e-09
RP11-418J17.1	DBT	0.596801	3.27283e-09
RP11-473M20.14	DBT	0.596513	3.34487e-09
TRAPPC12-AS1	UGDH	0.595922	3.49777e-09
ZNRD1-AS1	COQ2	0.595622	3.5776e-09
RP11-806H10.4	PYGL	0.595425	3.63125e-09
AC104024.1	ST8SIA5	0.59448	3.89897e-09
RP3-414A15.2	DBT	0.593912	4.06864e-09
RP11-218M22.1	DBT	0.59364	4.15266e-09
RP11-760H22.2	NDUFV3	0.592653	4.47062e-09
RP11-685M7.3	DBT	0.592557	4.50263e-09
CTD-2541M15.1	DBT	0.591692	4.8026e-09
RP11-228B15.4	FPGS	0.591597	4.8368e-09
RP11-575L7.4	DBT	0.589856	5.50325e-09
AD000090.2	DBT	0.589003	5.86134e-09
RP11-466F5.8	UGDH	0.585676	7.48078e-09
RP11-572M11.3	NDUFV1	0.58543	7.61571e-09
RP11-97O12.7	NDUFV1	0.585389	7.63878e-09
RP11-701P16.5	ACSL1	0.582965	9.10766e-09
RP3-467K16.4	PYGL	0.581383	1.02068e-08
RP11-328D5.1	MGAT5B	0.579348	1.18087e-08
RP11-305E17.6	DBT	0.579219	1.1918e-08
AC004840.9	LIPC	0.578	1.29983e-08
AC147651.3	ALG13	0.576449	1.4509e-08
RP11-186F10.2	MGAT5B	0.576272	1.46918e-08
CTD-2555O16.1	ALG13	0.576232	1.47326e-08
AP001056.1	ALG13	0.575992	1.49852e-08
RP11-54O7.18	ETNK2	0.573478	1.78805e-08
RP11-165F24.3	PLCG2	0.572739	1.88281e-08
USP46-AS1	DBT	0.572622	1.89828e-08
RP11-459E5.1	ETNK2	0.57247	1.91855e-08
AC008746.3	DBT	0.572371	1.93183e-08
RP11-389O22.1	H6PD	0.571718	2.02177e-08
AC009501.4	H6PD	0.571103	2.10998e-08
RP11-977G19.12	UGDH	0.57101	2.12365e-08
SPATA41	MGAT5B	0.569664	2.33128e-08
RP11-523O18.5	NDUFV1	0.568776	2.47849e-08
CTD-2324F15.2	LIPC	0.568703	2.49095e-08
IQCH-AS1	DBT	0.568092	2.59793e-08
RP11-506M12.1	DBT	0.56787	2.638e-08
CTD-2283N19.1	DBT	0.567332	2.7372e-08
CTD-2528L19.6	UGDH	0.566332	2.93109e-08
RP11-35G9.3	COQ2	0.565712	3.05782e-08
RP11-16E12.2	FUT7	0.563505	3.55269e-08
RP11-428J1.5	UCK2	0.563371	3.58486e-08
RP11-359G22.2	NDUFV3	0.56227	3.8619e-08
LINC00959	PLCG2	0.56194	3.94876e-08
TMCC1-AS1	NDUFV1	0.561925	3.95271e-08
RP11-122G18.5	UCK2	0.561797	3.9869e-08
MCM3AP-AS1	H6PD	0.560742	4.2798e-08
RP11-308D16.4	DBT	0.560403	4.37821e-08
ZBED3-AS1	UCK2	0.559975	4.50567e-08
AC020594.5	UGDH	0.559695	4.59078e-08
AP001189.4	UPB1	0.559675	4.59689e-08
RP11-355F16.1	UCK2	0.558777	4.8809e-08
INTS6-AS1	DBT	0.558523	4.9643e-08
RP11-159F24.6	DBT	0.557637	5.26546e-08
AC093627.12	PYGL	0.557309	5.38144e-08
RBFADN	SORD	0.556076	5.83903e-08
RP5-886K2.3	SORD	0.555838	5.9316e-08
RP11-355N15.1	UGDH	0.554762	6.36761e-08
RP11-752G15.8	DBT	0.553604	6.87042e-08
PRSS51	UCK2	0.552415	7.42651e-08
CTD-2006C1.12	H6PD	0.552117	7.57229e-08
CTD-2006K23.1	UGDH	0.552077	7.59199e-08
AC007551.3	ALG13	0.551682	7.78996e-08
RP11-395N3.2	PGAM2	0.551609	7.82693e-08
CTB-179K24.3	DBT	0.551401	7.93375e-08
RP11-885B4.2	CSGALNACT1	0.551048	8.11761e-08
DICER1-AS1	DBT	0.550958	8.16553e-08
AC007228.11	CMPK2	0.550051	8.66056e-08
